# Supplementary material
Source: publisher figshare collection journal article supplement (https://springernature.figshare.com/articles/dataset/_/21300114)
Supplement: Supplementary file 1 [file 1]

## Sheet: jgi_alignment_hits
Hit	Hsp	Score	EValue	Alignment Length	% Hit Coverage	Hit Identity	% Hit Identity	Query Name	Query Start	Query End	Hit Name	Hit Start	Hit End	Organism	Dataset
NeoWI3_1|898151	1-184:910.0	910	1.11e-117	184	1	168	0.913	102822 No KEGG functional class	1	184	jgi|NeoWI3_1|898151|fgenesh2_kg.7___109___TRINITY_DN12262_c1_g2_i3	1	184	Neocallimastix sp. WI3-B v1.0	NeoWI3_1_GeneCatalog_proteins_20201119.aa
NeoWI3_1|898150	1-184:919.0	919	6.35e-119	184	1	171	0.9293	102822 No KEGG functional class	1	184	jgi|NeoWI3_1|898150|fgenesh2_kg.7___108___TRINITY_DN12262_c1_g2_i3	1	184	Neocallimastix sp. WI3-B v1.0	NeoWI3_1_GeneCatalog_proteins_20201119.aa
NeoWI3_1|244662	1-184:917.0	917	1.2e-118	184	1	171	0.9293	102822 No KEGG functional class	1	184	jgi|NeoWI3_1|244662|CE244661_192	1	184	Neocallimastix sp. WI3-B v1.0	NeoWI3_1_GeneCatalog_proteins_20201119.aa
Neosp1|706029	1-184:975.0	975	8.04e-127	184	1	182	0.9891	102822 No KEGG functional class	1	184	jgi|Neosp1|706029|fgenesh2_kg.200_#_13_#_Locus2303v1rpkm37.03	1	184	Neocallimastix californiae G1 v1.0	Neosp1_GeneCatalog_proteins_20170918.aa
Neosp1|102822	1-184:984.0	984	4.6e-128	184	1	184	1	102822 No KEGG functional class	1	184	jgi|Neosp1|102822|CE102821_434	1	184	Neocallimastix californiae G1 v1.0	Neosp1_GeneCatalog_proteins_20170918.aa
Neolan1|1311704	1-184:973.0	973	2.04e-126	184	1	182	0.9891	102822 No KEGG functional class	1	184	jgi|Neolan1|1311704|estExt_fgenesh1_pg.C_690097	1	184	Neocallimastix lanati v1.0	Neolan1_GeneCatalog_proteins_20200610.aa
Neolan1|1047975	1-184:984.0	984	6.19e-128	184	1	184	1	102822 No KEGG functional class	1	184	jgi|Neolan1|1047975|estExt_Genewise1Plus.C_690213	1	184	Neocallimastix lanati v1.0	Neolan1_GeneCatalog_proteins_20200610.aa
NeoGfMa1|719305	1-184:910.0	910	1.12e-117	184	1	168	0.913	102822 No KEGG functional class	1	184	jgi|NeoGfMa1|719305|fgenesh2_kg.26___58___TRINITY_DN10679_c0_g1_i1	1	184	Neocallimastix sp. Gf-Ma3-1 v1.0	NeoGfMa1_GeneCatalog_proteins_20201119.aa
NeoGfMa1|62005	1-184:919.0	919	6.42e-119	184	1	171	0.9293	102822 No KEGG functional class	1	184	jgi|NeoGfMa1|62005|CE62004_50	1	184	Neocallimastix sp. Gf-Ma3-1 v1.0	NeoGfMa1_GeneCatalog_proteins_20201119.aa
NeoGfMa1|62004	1-184:917.0	917	1.21e-118	184	1	171	0.9293	102822 No KEGG functional class	1	184	jgi|NeoGfMa1|62004|CE62003_213	1	184	Neocallimastix sp. Gf-Ma3-1 v1.0	NeoGfMa1_GeneCatalog_proteins_20201119.aa
Piromy_p0_1|532019	56-107:243.0 1-57:222.0 57-102:183.0 19-54:81.0	729	1.46e-51	191	0.3996	117	0.6126	106854 No KEGG functional class	1	107	jgi|Piromy_p0_1|532019|fgenesh2_kg.chromosome_5___1492___TRINITY_DN6743_c0_g1_i1	1	149	Piromyces sp. UH3-1 v2.0	Piromy_p0_1_GeneCatalog_proteins_20200513.aa
Pecora1|1979	1-107:474.0 57-99:187.0 23-54:81.0	742	4.17e-58	182	0.3768	120	0.6593	106854 No KEGG functional class	1	107	jgi|Pecora1|1979|allA01929	1	144	Pecoramyces sp. F1	Pecora1_ExternalModels_proteins_2021-11-19.fasta
NeoWI3_1|756078	1-107:498.0 57-100:167.0 19-54:79.0	744	3.31e-61	187	0.3542	122	0.6524	106854 No KEGG functional class	1	107	jgi|NeoWI3_1|756078|estExt_Genemark4.C_12_t20319	1	145	Neocallimastix sp. WI3-B v1.0	NeoWI3_1_GeneCatalog_proteins_20201119.aa
NeoWI3_1|152484	1-108:539.0 57-96:160.0 23-54:82.0	781	6.68e-67	180	0.3734	129	0.7167	106854 No KEGG functional class	1	108	jgi|NeoWI3_1|152484|CE152483_37238	1	141	Neocallimastix sp. WI3-B v1.0	NeoWI3_1_GeneCatalog_proteins_20201119.aa
Neosp1|141915	1-107:474.0 57-96:166.0 19-54:81.0	721	4.86e-58	183	0.688	117	0.6393	106854 No KEGG functional class	1	107	jgi|Neosp1|141915|CE141914_2110	1	141	Neocallimastix californiae G1 v1.0	Neosp1_GeneCatalog_proteins_20170918.aa
Neosp1|106854	1-128:666.0 161-184:117.0	783	1.84e-95	152	0.8261	142	0.9342	106854 No KEGG functional class	1	184	jgi|Neosp1|106854|CE106853_7595	1	184	Neocallimastix californiae G1 v1.0	Neosp1_GeneCatalog_proteins_20170918.aa
Neolan1|1741721	1-108:570.0 57-96:166.0 23-54:86.0	822	3.03e-71	180	0.3734	136	0.7556	106854 No KEGG functional class	1	108	jgi|Neolan1|1741721|fgenesh2_kg.164___73___TRINITY_DN369_c4_g1_i1	1	141	Neocallimastix lanati v1.0	Neolan1_GeneCatalog_proteins_20200610.aa
Neolan1|932305	1-107:474.0 57-96:166.0 19-54:81.0	721	6.54e-58	183	0.3805	117	0.6393	106854 No KEGG functional class	1	107	jgi|Neolan1|932305|e_gw1.23.486.1	1	141	Neocallimastix lanati v1.0	Neolan1_GeneCatalog_proteins_20200610.aa
NeoGfMa1|412775	1-108:539.0 57-96:160.0 23-54:82.0	781	6.75e-67	180	0.3734	129	0.7167	106854 No KEGG functional class	1	108	jgi|NeoGfMa1|412775|estExt_Genewise1Plus.C_450004	1	141	Neocallimastix sp. Gf-Ma3-1 v1.0	NeoGfMa1_GeneCatalog_proteins_20201119.aa
NeoGfMa1|394911	1-107:498.0 57-100:167.0 19-54:79.0	744	3.34e-61	187	0.3896	122	0.6524	106854 No KEGG functional class	1	107	jgi|NeoGfMa1|394911|estExt_Genewise1Plus.C_8_t10211	1	145	Neocallimastix sp. Gf-Ma3-1 v1.0	NeoGfMa1_GeneCatalog_proteins_20201119.aa
NeoWI3_1|222524	23-285:1270.0 279-375:478.0	1748	0	360	0.9574	317	0.8806	150710 No KEGG functional class	23	375	jgi|NeoWI3_1|222524|CE222523_1351	23	376	Neocallimastix sp. WI3-B v1.0	NeoWI3_1_GeneCatalog_proteins_20201119.aa
NeoWI3_1|222509	23-285:1271.0 279-375:478.0	1749	0	360	0.9574	318	0.8833	150710 No KEGG functional class	23	375	jgi|NeoWI3_1|222509|CE222508_1439	23	376	Neocallimastix sp. WI3-B v1.0	NeoWI3_1_GeneCatalog_proteins_20201119.aa
Neosp1|409744	23-375:1824.0	1824	0	353	0.9413	333	0.9433	150710 No KEGG functional class	23	375	jgi|Neosp1|409744|e_gw1.69.190.1	23	375	Neocallimastix californiae G1 v1.0	Neosp1_GeneCatalog_proteins_20170918.aa
Neosp1|375710	136-284:544.0 23-132:443.0 330-375:205.0 296-327:97.0 284-301:64.0 326-344:75.0 353-368:73.0	1501	1.83e-156	390	0.9873	257	0.659	150710 No KEGG functional class	23	375	jgi|Neosp1|375710|estExt_Genewise1.C_90199	24	395	Neocallimastix californiae G1 v1.0	Neosp1_GeneCatalog_proteins_20170918.aa
Neosp1|150710	23-375:1866.0	1866	0	353	0.9413	343	0.9717	150710 No KEGG functional class	23	375	jgi|Neosp1|150710|CE150709_2596	23	375	Neocallimastix californiae G1 v1.0	Neosp1_GeneCatalog_proteins_20170918.aa
Neolan1|991298	136-284:544.0 23-132:443.0 330-375:205.0 296-327:97.0 284-301:64.0 326-344:75.0 353-368:73.0	1501	2.47e-156	390	0.9873	257	0.659	150710 No KEGG functional class	23	375	jgi|Neolan1|991298|estExt_Genewise1.C_380396	24	395	Neocallimastix lanati v1.0	Neolan1_GeneCatalog_proteins_20200610.aa
Neolan1|386075	23-375:1824.0	1824	0	353	0.9413	333	0.9433	150710 No KEGG functional class	23	375	jgi|Neolan1|386075|CE386074_4816	23	375	Neocallimastix lanati v1.0	Neolan1_GeneCatalog_proteins_20200610.aa
Neolan1|85209	23-375:1866.0	1866	0	353	0.9413	343	0.9717	150710 No KEGG functional class	23	375	jgi|Neolan1|85209|CE85208_9562	23	375	Neocallimastix lanati v1.0	Neolan1_GeneCatalog_proteins_20200610.aa
NeoGfMa1|575131	23-285:1270.0 279-375:478.0	1748	0	360	0.9574	317	0.8806	150710 No KEGG functional class	23	375	jgi|NeoGfMa1|575131|estExt_Genemark4.C_590050	23	376	Neocallimastix sp. Gf-Ma3-1 v1.0	NeoGfMa1_GeneCatalog_proteins_20201119.aa
NeoGfMa1|116221	23-285:1271.0 279-375:478.0	1749	0	360	0.9574	318	0.8833	150710 No KEGG functional class	23	375	jgi|NeoGfMa1|116221|CE116220_654	23	376	Neocallimastix sp. Gf-Ma3-1 v1.0	NeoGfMa1_GeneCatalog_proteins_20201119.aa
Piromy_p0_1|467863	577-625:146.0 635-684:115.0 117-162:106.0 724-756:81.0 784-813:81.0 474-519:80.0 695-715:73.0 163-192:71.0 439-465:69.0 325-360:66.0 275-302:62.0 522-542:61.0 42-75:53.0 390-438:50.0 566-631:136.0 629-673:90.0 439-465:85.0 330-358:73.0 492-521:73.0 695-717:62.0 368-403:50.0 276-293:47.0 522-534:43.0 577-627:124.0 643-686:97.0 718-777:92.0 522-568:70.0 771-822:66.0 476-521:77.0 439-473:76.0 330-35…	2801	7.66e-72	1312	0.6233	520	0.3963	151298 No KEGG functional class	42	822	jgi|Piromy_p0_1|467863|gm4.9303_g	19	2070	Piromyces sp. UH3-1 v2.0	Piromy_p0_1_GeneCatalog_proteins_20200513.aa
PirE2_1|9784	117-190:163.0 573-625:137.0 629-684:116.0 476-521:90.0 786-821:76.0 325-360:72.0 190-240:68.0 695-720:68.0 724-756:68.0 426-465:66.0 523-542:59.0 575-632:154.0 635-687:117.0 439-467:72.0 680-713:72.0 488-521:61.0 368-403:57.0 522-565:49.0 577-631:126.0 718-770:118.0 643-684:94.0 771-819:83.0 528-564:50.0 695-715:50.0 577-629:135.0 629-673:102.0 368-403:72.0 434-467:72.0 695-715:66.0 318-365:57.0 …	3208	2.11e-67	1616	0.6084	623	0.3855	151298 No KEGG functional class	37	821	jgi|PirE2_1|9784|gm1.8730_g	97	2653	Piromyces sp. E2 v1.0	PirE2_1_GeneCatalog_proteins_20110421.aa
Pecora1|16076	293-441:361.0 558-625:235.0 635-712:163.0 177-220:135.0 708-747:128.0 151-181:107.0 118-147:84.0 39-87:72.0 521-543:70.0 500-516:67.0 786-823:55.0 275-293:50.0 755-775:49.0 648-700:121.0 325-360:99.0 591-631:95.0 436-475:94.0 706-738:88.0 493-527:66.0 274-323:60.0 287-368:148.0 419-470:95.0 500-543:71.0 633-673:69.0 58-79:63.0 575-600:63.0 203-235:62.0 606-627:60.0 626-684:104.0 432-468:86.0 476-…	3995	3.71e-135	1824	0.6486	751	0.4117	151298 No KEGG functional class	39	823	jgi|Pecora1|16076|allA16787	22	2765	Pecoramyces sp. F1	Pecora1_ExternalModels_proteins_2021-11-19.fasta
Orpsp1_1|1184963	293-441:361.0 694-790:242.0 558-625:233.0 177-233:166.0 151-181:107.0 118-147:84.0 39-87:72.0 521-543:70.0 500-516:67.0 275-293:49.0 635-712:162.0 423-468:80.0 488-507:47.0 333-360:67.0 432-465:65.0 274-323:59.0 377-404:44.0	1975	6.74e-138	824	0.8747	363	0.4405	151298 No KEGG functional class	39	790	jgi|Orpsp1_1|1184963|evm.model.c7180000091734.1	15	935	Orpinomyces sp.	Orpsp1_1_GeneCatalog_proteins_20140826.aa
NeoWI3_1|791593	117-479:1496.0 708-814:492.0 478-499:54.0 472-706:933.0 706-736:87.0 775-822:69.0 222-254:49.0 629-692:128.0 319-361:119.0 706-741:95.0 591-627:88.0 442-467:79.0 498-565:71.0 299-368:121.0 500-564:86.0 572-602:80.0 443-467:76.0 600-627:70.0 633-663:63.0 391-416:49.0 688-745:139.0 626-684:109.0 329-360:80.0 432-484:72.0 576-600:65.0 374-391:60.0 274-335:91.0 439-467:69.0 328-360:62.0	5052	0	1758	0.6363	945	0.5375	151298 No KEGG functional class	117	822	jgi|NeoWI3_1|791593|estExt_fgenesh1_pm.C_190144	1	2703	Neocallimastix sp. WI3-B v1.0	NeoWI3_1_GeneCatalog_proteins_20201119.aa
Neosp1|518250	686-813:166.0 576-631:149.0 631-684:126.0 119-178:124.0 337-371:76.0 440-465:72.0 488-521:71.0 274-289:52.0 39-64:51.0 293-360:120.0 430-475:98.0 473-516:98.0 604-631:79.0 626-665:66.0 662-691:57.0 687-706:52.0 755-817:52.0 576-598:47.0 724-732:47.0 374-389:42.0 521-577:42.0	1687	1.49e-66	879	0.6579	317	0.3606	151298 No KEGG functional class	39	817	jgi|Neosp1|518250|fgenesh1_pg.365_#_6	41	1334	Neocallimastix californiae G1 v1.0	Neosp1_GeneCatalog_proteins_20170918.aa
Neosp1|151298	1-826:4221.0	4221	0	826	1	800	0.9685	151298 No KEGG functional class	1	826	jgi|Neosp1|151298|CE151297_2349	1	826	Neocallimastix californiae G1 v1.0	Neosp1_GeneCatalog_proteins_20170918.aa
Neolan1|959017	1-826:4216.0	4216	0	826	1	799	0.9673	151298 No KEGG functional class	1	826	jgi|Neolan1|959017|e_gw1.117.97.1	1	826	Neocallimastix lanati v1.0	Neolan1_GeneCatalog_proteins_20200610.aa
NeoGfMa1|401648	472-706:938.0 281-460:834.0 708-798:400.0 649-698:131.0 319-361:119.0 691-741:102.0 591-631:90.0 442-467:73.0 485-527:54.0 222-254:49.0 299-368:121.0 500-564:86.0 572-602:80.0 443-467:76.0 600-627:70.0 633-663:63.0 391-416:49.0 688-745:139.0 626-684:109.0 329-360:80.0 432-484:72.0 759-814:64.0 374-391:60.0 584-600:50.0 706-731:69.0 602-630:66.0 376-416:54.0 575-600:53.0 476-506:47.0	4198	0	1515	0.6271	783	0.5168	151298 No KEGG functional class	222	814	jgi|NeoGfMa1|401648|estExt_Genewise1Plus.C_17_t10259	1	2356	Neocallimastix sp. Gf-Ma3-1 v1.0	NeoGfMa1_GeneCatalog_proteins_20201119.aa
Caecom1|460220	294-437:349.0 500-625:343.0 708-790:209.0 635-692:170.0 462-486:63.0 275-288:52.0 708-747:124.0 635-684:122.0 476-543:108.0 420-468:85.0 579-600:66.0 758-776:49.0 594-620:43.0 686-698:42.0 629-693:129.0 325-360:107.0 708-738:105.0 437-475:84.0 592-631:82.0 500-516:49.0 787-813:47.0 423-459:102.0 500-521:70.0 708-733:63.0 601-630:57.0 577-604:53.0 487-505:50.0 280-366:131.0 333-360:84.0 501-536:69…	3212	1e-128	1356	0.5797	602	0.444	151298 No KEGG functional class	275	813	jgi|Caecom1|460220|fgenesh1_kg.301_#_19_#_TRINITY_DN2174_c0_g1_i1	20	2110	Caecomyces churrovis A v1.0	Caecom1_GeneCatalog_proteins_20171213.aa
NeoWI3_1|752292	13-183:866.0 1-18:54.0	920	2.92e-113	189	1.0272	174	0.9206	153645 No KEGG functional class	1	183	jgi|NeoWI3_1|752292|estExt_Genemark4.C_5_t10180	1	184	Neocallimastix sp. WI3-B v1.0	NeoWI3_1_GeneCatalog_proteins_20201119.aa
NeoWI3_1|565721	13-183:865.0 1-18:49.0	914	1.95e-112	189	1.0272	173	0.9153	153645 No KEGG functional class	1	183	jgi|NeoWI3_1|565721|estExt_Genewise1Plus.C_5_t10234	1	184	Neocallimastix sp. WI3-B v1.0	NeoWI3_1_GeneCatalog_proteins_20201119.aa
NeoWI3_1|565716	13-183:878.0 1-18:50.0	928	2.33e-114	189	1.0272	176	0.9312	153645 No KEGG functional class	1	183	jgi|NeoWI3_1|565716|estExt_Genewise1Plus.C_5_t10229	1	184	Neocallimastix sp. WI3-B v1.0	NeoWI3_1_GeneCatalog_proteins_20201119.aa
Neosp1|699332	1-183:960.0	960	1.71e-124	183	1	183	1	153645 No KEGG functional class	1	183	jgi|Neosp1|699332|fgenesh2_kg.29_#_76_#_Locus7818v1rpkm5.08	1	183	Neocallimastix californiae G1 v1.0	Neosp1_GeneCatalog_proteins_20170918.aa
Neosp1|153645	1-183:960.0	960	1.71e-124	183	1	183	1	153645 No KEGG functional class	1	183	jgi|Neosp1|153645|CE153644_248	1	183	Neocallimastix californiae G1 v1.0	Neosp1_GeneCatalog_proteins_20170918.aa
Neolan1|1629563	1-183:960.0	960	2.3e-124	183	1	183	1	153645 No KEGG functional class	1	183	jgi|Neolan1|1629563|fgenesh2_kg.7___206___TRINITY_DN8939_c0_g1_i1	1	183	Neocallimastix lanati v1.0	Neolan1_GeneCatalog_proteins_20200610.aa
Neolan1|538121	1-183:953.0	953	2.12e-123	183	1	181	0.9891	153645 No KEGG functional class	1	183	jgi|Neolan1|538121|CE538120_463	1	183	Neocallimastix lanati v1.0	Neolan1_GeneCatalog_proteins_20200610.aa
NeoGfMa1|668776	13-183:871.0 1-18:54.0	925	6.08e-114	189	1.0272	175	0.9259	153645 No KEGG functional class	1	183	jgi|NeoGfMa1|668776|MIX62391_41_95	1	184	Neocallimastix sp. Gf-Ma3-1 v1.0	NeoGfMa1_GeneCatalog_proteins_20201119.aa
NeoGfMa1|592146	13-183:878.0 1-18:54.0	932	6.65e-115	189	1.0272	177	0.9365	153645 No KEGG functional class	1	183	jgi|NeoGfMa1|592146|estExt_fgenesh1_pg.C_690026	1	184	Neocallimastix sp. Gf-Ma3-1 v1.0	NeoGfMa1_GeneCatalog_proteins_20201119.aa
NeoGfMa1|575999	13-183:871.0 1-18:54.0	925	6.08e-114	189	1.0272	175	0.9259	153645 No KEGG functional class	1	183	jgi|NeoGfMa1|575999|estExt_Genemark4.C_690027	1	184	Neocallimastix sp. Gf-Ma3-1 v1.0	NeoGfMa1_GeneCatalog_proteins_20201119.aa
Pecora1|1759	19-218:689.0	689	1.94e-86	200	0.9132	128	0.64	162452 No KEGG functional class	19	218	jgi|Pecora1|1759|allA01738	19	218	Pecoramyces sp. F1	Pecora1_ExternalModels_proteins_2021-11-19.fasta
Orpsp1_1|1191923	19-218:689.0	689	1.63e-86	200	0.9174	128	0.64	162452 No KEGG functional class	19	218	jgi|Orpsp1_1|1191923|evm.model.d7180000089387.1	19	218	Orpinomyces sp.	Orpsp1_1_GeneCatalog_proteins_20140826.aa
NeoWI3_1|888412	1-218:920.0	920	8.34e-118	218	1	176	0.8073	162452 No KEGG functional class	1	218	jgi|NeoWI3_1|888412|fgenesh2_kg.1___1157___TRINITY_DN7619_c0_g2_i1	1	218	Neocallimastix sp. WI3-B v1.0	NeoWI3_1_GeneCatalog_proteins_20201119.aa
NeoWI3_1|561994	1-209:579.0 188-218:116.0	695	3.69e-71	240	1.106	127	0.5292	162452 No KEGG functional class	1	218	jgi|NeoWI3_1|561994|estExt_Genewise1Plus.C_1_t40230	1	217	Neocallimastix sp. WI3-B v1.0	NeoWI3_1_GeneCatalog_proteins_20201119.aa
Neosp1|705478	1-210:584.0 188-218:116.0	700	5.21e-72	241	1.1106	133	0.5519	162452 No KEGG functional class	1	218	jgi|Neosp1|705478|fgenesh2_kg.176_#_11_#_Locus10043v1rpkm3.05	1	217	Neocallimastix californiae G1 v1.0	Neosp1_GeneCatalog_proteins_20170918.aa
Neosp1|162452	1-218:1002.0	1002	3.45e-129	218	1	195	0.8945	162452 No KEGG functional class	1	218	jgi|Neosp1|162452|CE162451_415	1	218	Neocallimastix californiae G1 v1.0	Neosp1_GeneCatalog_proteins_20170918.aa
Neolan1|1620831	1-210:584.0 188-218:116.0	700	7.02e-72	241	1.1106	133	0.5519	162452 No KEGG functional class	1	218	jgi|Neolan1|1620831|fgenesh2_kg.2___2369___TRINITY_DN98_c2_g3_i1	1	217	Neocallimastix lanati v1.0	Neolan1_GeneCatalog_proteins_20200610.aa
Neolan1|359164	1-218:997.0	997	2.24e-128	218	1	194	0.8899	162452 No KEGG functional class	1	218	jgi|Neolan1|359164|CE359163_3316	1	218	Neocallimastix lanati v1.0	Neolan1_GeneCatalog_proteins_20200610.aa
NeoGfMa1|698260	1-209:579.0 188-218:116.0	695	3.74e-71	240	1.106	127	0.5292	162452 No KEGG functional class	1	218	jgi|NeoGfMa1|698260|fgenesh2_kg.1___788___TRINITY_DN13585_c0_g1_i1	1	217	Neocallimastix sp. Gf-Ma3-1 v1.0	NeoGfMa1_GeneCatalog_proteins_20201119.aa
NeoGfMa1|563218	1-218:920.0	920	8.44e-118	218	1	176	0.8073	162452 No KEGG functional class	1	218	jgi|NeoGfMa1|563218|estExt_Genemark4.C_3_t20371	1	218	Neocallimastix sp. Gf-Ma3-1 v1.0	NeoGfMa1_GeneCatalog_proteins_20201119.aa
Piromy_p0_1|430669	83-204:691.0 1-59:237.0	928	1.65e-114	181	0.8873	164	0.9061	166397 No KEGG functional class	1	204	jgi|Piromy_p0_1|430669|fgenesh1_pm.chromosome_4_#_1097	1	204	Piromyces sp. UH3-1 v2.0	Piromy_p0_1_GeneCatalog_proteins_20200513.aa
Pecora1|3051	83-204:692.0 1-59:241.0	933	3.04e-115	181	0.3901	165	0.9116	166397 No KEGG functional class	1	204	jgi|Pecora1|3051|allA03093	1	204	Pecoramyces sp. F1	Pecora1_ExternalModels_proteins_2021-11-19.fasta
Orpsp1_1|1187037	83-204:692.0 1-59:241.0	933	2.58e-115	181	0.3987	165	0.9116	166397 No KEGG functional class	1	204	jgi|Orpsp1_1|1187037|evm.model.d7180000055017.1	1	204	Orpinomyces sp.	Orpsp1_1_GeneCatalog_proteins_20140826.aa
NeoWI3_1|771987	83-204:691.0 1-59:241.0	932	7.16e-115	181	0.8873	164	0.9061	166397 No KEGG functional class	1	204	jgi|NeoWI3_1|771987|fgenesh1_pm.6_#_277	1	204	Neocallimastix sp. WI3-B v1.0	NeoWI3_1_GeneCatalog_proteins_20201119.aa
NeoWI3_1|508193	83-205:702.0 1-59:248.0	950	2.41e-117	182	0.8708	168	0.9231	166397 No KEGG functional class	1	205	jgi|NeoWI3_1|508193|e_gw1.65.100.1	1	205	Neocallimastix sp. WI3-B v1.0	NeoWI3_1_GeneCatalog_proteins_20201119.aa
Neosp1|166397	83-209:727.0 1-59:249.0	976	4.4e-121	186	0.89	173	0.9301	166397 No KEGG functional class	1	209	jgi|Neosp1|166397|CE166396_12755	1	209	Neocallimastix californiae G1 v1.0	Neosp1_GeneCatalog_proteins_20170918.aa
Neosp1|144849	83-204:691.0 49-59:55.0	746	1.7e-89	133	0.8526	130	0.9774	166397 No KEGG functional class	49	204	jgi|Neosp1|144849|CE144848_6241	1	156	Neocallimastix californiae G1 v1.0	Neosp1_GeneCatalog_proteins_20170918.aa
Neolan1|1275190	83-209:727.0 1-59:249.0	976	5.92e-121	186	0.89	173	0.9301	166397 No KEGG functional class	1	209	jgi|Neolan1|1275190|fgenesh1_pm.43_#_104	1	209	Neocallimastix lanati v1.0	Neolan1_GeneCatalog_proteins_20200610.aa
NeoGfMa1|596883	83-204:691.0 1-59:241.0	932	7.24e-115	181	0.8873	164	0.9061	166397 No KEGG functional class	1	204	jgi|NeoGfMa1|596883|estExt_fgenesh1_pm.C_60268	1	204	Neocallimastix sp. Gf-Ma3-1 v1.0	NeoGfMa1_GeneCatalog_proteins_20201119.aa
NeoGfMa1|557060	83-205:702.0 1-59:248.0	950	2.44e-117	182	0.8708	168	0.9231	166397 No KEGG functional class	1	205	jgi|NeoGfMa1|557060|fgenesh1_pm.49_#_9	1	205	Neocallimastix sp. Gf-Ma3-1 v1.0	NeoGfMa1_GeneCatalog_proteins_20201119.aa
NeoWI3_1|919266	1-74:304.0	304	5.74e-35	74	0.3682	57	0.7703	189361 No KEGG functional class	1	74	jgi|NeoWI3_1|919266|fgenesh2_kg.25___189___TRINITY_DN12447_c3_g1_i1	1	74	Neocallimastix sp. WI3-B v1.0	NeoWI3_1_GeneCatalog_proteins_20201119.aa
NeoWI3_1|752112	1-75:249.0	249	2.62e-27	75	0.375	46	0.6133	189361 No KEGG functional class	1	75	jgi|NeoWI3_1|752112|estExt_Genemark4.C_4_t30010	1	75	Neocallimastix sp. WI3-B v1.0	NeoWI3_1_GeneCatalog_proteins_20201119.aa
NeoWI3_1|565349	1-75:249.0	249	2.62e-27	75	0.375	46	0.6133	189361 No KEGG functional class	1	75	jgi|NeoWI3_1|565349|estExt_Genewise1Plus.C_4_t30223	1	75	Neocallimastix sp. WI3-B v1.0	NeoWI3_1_GeneCatalog_proteins_20201119.aa
Neosp1|189365	1-75:356.0	356	2.3e-42	75	1	72	0.96	189361 No KEGG functional class	1	75	jgi|Neosp1|189365|CE189364_1267	1	75	Neocallimastix californiae G1 v1.0	Neosp1_GeneCatalog_proteins_20170918.aa
Neosp1|189361	1-75:368.0	368	4.9e-44	75	1	75	1	189361 No KEGG functional class	1	75	jgi|Neosp1|189361|CE189360_1290	1	75	Neocallimastix californiae G1 v1.0	Neosp1_GeneCatalog_proteins_20170918.aa
Neolan1|1664763	1-75:345.0	345	1.06e-40	75	0.375	70	0.9333	189361 No KEGG functional class	1	75	jgi|Neolan1|1664763|fgenesh2_kg.32___946___TRINITY_DN2_c2_g1_i4	1	75	Neocallimastix lanati v1.0	Neolan1_GeneCatalog_proteins_20200610.aa
Neolan1|1664761	1-75:357.0	357	2.27e-42	75	0.375	73	0.9733	189361 No KEGG functional class	1	75	jgi|Neolan1|1664761|fgenesh2_kg.32___944___TRINITY_DN2_c2_g1_i3	1	75	Neocallimastix lanati v1.0	Neolan1_GeneCatalog_proteins_20200610.aa
NeoGfMa1|700209	1-75:249.0	249	2.65e-27	75	0.375	46	0.6133	189361 No KEGG functional class	1	75	jgi|NeoGfMa1|700209|fgenesh2_kg.2___1033___TRINITY_DN11830_c1_g2_i1	1	75	Neocallimastix sp. Gf-Ma3-1 v1.0	NeoGfMa1_GeneCatalog_proteins_20201119.aa
NeoGfMa1|700204	1-75:249.0	249	2.65e-27	75	0.375	46	0.6133	189361 No KEGG functional class	1	75	jgi|NeoGfMa1|700204|fgenesh2_kg.2___1028___TRINITY_DN11830_c1_g2_i1	1	75	Neocallimastix sp. Gf-Ma3-1 v1.0	NeoGfMa1_GeneCatalog_proteins_20201119.aa
NeoGfMa1|587514	1-74:304.0	304	5.81e-35	74	0.3814	57	0.7703	189361 No KEGG functional class	1	74	jgi|NeoGfMa1|587514|estExt_fgenesh1_pg.C_270090	1	74	Neocallimastix sp. Gf-Ma3-1 v1.0	NeoGfMa1_GeneCatalog_proteins_20201119.aa
NeoWI3_1|919266	1-74:297.0	297	8.58e-34	74	0.3682	57	0.7703	189365 No KEGG functional class	1	74	jgi|NeoWI3_1|919266|fgenesh2_kg.25___189___TRINITY_DN12447_c3_g1_i1	1	74	Neocallimastix sp. WI3-B v1.0	NeoWI3_1_GeneCatalog_proteins_20201119.aa
NeoWI3_1|752112	1-75:251.0	251	2.03e-27	75	0.375	48	0.64	189365 No KEGG functional class	1	75	jgi|NeoWI3_1|752112|estExt_Genemark4.C_4_t30010	1	75	Neocallimastix sp. WI3-B v1.0	NeoWI3_1_GeneCatalog_proteins_20201119.aa
NeoWI3_1|565349	1-75:251.0	251	2.03e-27	75	0.375	48	0.64	189365 No KEGG functional class	1	75	jgi|NeoWI3_1|565349|estExt_Genewise1Plus.C_4_t30223	1	75	Neocallimastix sp. WI3-B v1.0	NeoWI3_1_GeneCatalog_proteins_20201119.aa
Neosp1|189365	1-75:366.0	366	1.64e-43	75	1	75	1	189365 No KEGG functional class	1	75	jgi|Neosp1|189365|CE189364_1267	1	75	Neocallimastix californiae G1 v1.0	Neosp1_GeneCatalog_proteins_20170918.aa
Neosp1|189361	1-75:356.0	356	3.99e-42	75	1	72	0.96	189365 No KEGG functional class	1	75	jgi|Neosp1|189361|CE189360_1290	1	75	Neocallimastix californiae G1 v1.0	Neosp1_GeneCatalog_proteins_20170918.aa
Neolan1|1664763	1-75:355.0	355	7.23e-42	75	0.375	73	0.9733	189365 No KEGG functional class	1	75	jgi|Neolan1|1664763|fgenesh2_kg.32___946___TRINITY_DN2_c2_g1_i4	1	75	Neocallimastix lanati v1.0	Neolan1_GeneCatalog_proteins_20200610.aa
Neolan1|1664761	1-75:345.0	345	1.76e-40	75	0.375	70	0.9333	189365 No KEGG functional class	1	75	jgi|Neolan1|1664761|fgenesh2_kg.32___944___TRINITY_DN2_c2_g1_i3	1	75	Neocallimastix lanati v1.0	Neolan1_GeneCatalog_proteins_20200610.aa
NeoGfMa1|700209	1-75:251.0	251	2.05e-27	75	0.375	48	0.64	189365 No KEGG functional class	1	75	jgi|NeoGfMa1|700209|fgenesh2_kg.2___1033___TRINITY_DN11830_c1_g2_i1	1	75	Neocallimastix sp. Gf-Ma3-1 v1.0	NeoGfMa1_GeneCatalog_proteins_20201119.aa
NeoGfMa1|700204	1-75:251.0	251	2.05e-27	75	0.375	48	0.64	189365 No KEGG functional class	1	75	jgi|NeoGfMa1|700204|fgenesh2_kg.2___1028___TRINITY_DN11830_c1_g2_i1	1	75	Neocallimastix sp. Gf-Ma3-1 v1.0	NeoGfMa1_GeneCatalog_proteins_20201119.aa
NeoGfMa1|587514	1-74:297.0	297	8.67e-34	74	0.3814	57	0.7703	189365 No KEGG functional class	1	74	jgi|NeoGfMa1|587514|estExt_fgenesh1_pg.C_270090	1	74	Neocallimastix sp. Gf-Ma3-1 v1.0	NeoGfMa1_GeneCatalog_proteins_20201119.aa
NeoWI3_1|750297	25-166:728.0 228-243:73.0	801	5.81e-96	158	0.6667	152	0.962	250252 No KEGG functional class	25	243	jgi|NeoWI3_1|750297|estExt_Genemark4.C_1_t10439	25	237	Neocallimastix sp. WI3-B v1.0	NeoWI3_1_GeneCatalog_proteins_20201119.aa
NeoWI3_1|2659	25-166:720.0 228-243:77.0	797	2.05e-95	158	0.6667	152	0.962	250252 No KEGG functional class	25	243	jgi|NeoWI3_1|2659|CE2658_290	25	237	Neocallimastix sp. WI3-B v1.0	NeoWI3_1_GeneCatalog_proteins_20201119.aa
NeoWI3_1|2650	25-164:708.0 228-243:65.0	773	3.96e-92	156	0.6582	145	0.9295	250252 No KEGG functional class	25	243	jgi|NeoWI3_1|2650|CE2649_145	25	237	Neocallimastix sp. WI3-B v1.0	NeoWI3_1_GeneCatalog_proteins_20201119.aa
Neosp1|701555	25-166:749.0 228-243:77.0	826	1.55e-99	158	0.6502	158	1	250252 No KEGG functional class	25	243	jgi|Neosp1|701555|fgenesh2_kg.67_#_19_#_Locus5799v1rpkm8.70	25	243	Neocallimastix californiae G1 v1.0	Neosp1_GeneCatalog_proteins_20170918.aa
Neosp1|250252	25-166:749.0 228-243:77.0	826	1.55e-99	158	0.6502	158	1	250252 No KEGG functional class	25	243	jgi|Neosp1|250252|CE250251_939	25	243	Neocallimastix californiae G1 v1.0	Neosp1_GeneCatalog_proteins_20170918.aa
Neolan1|1691936	25-166:745.0 228-243:77.0	822	7.32e-99	158	0.6502	157	0.9937	250252 No KEGG functional class	25	243	jgi|Neolan1|1691936|fgenesh2_kg.61___573___TRINITY_DN1323_c1_g1_i1	25	243	Neocallimastix lanati v1.0	Neolan1_GeneCatalog_proteins_20200610.aa
Neolan1|1293380	25-166:749.0 228-243:77.0	826	2.07e-99	158	0.6502	158	1	250252 No KEGG functional class	25	243	jgi|Neolan1|1293380|estExt_fgenesh1_pm.C_610072	25	243	Neocallimastix lanati v1.0	Neolan1_GeneCatalog_proteins_20200610.aa
NeoGfMa1|563277	25-166:732.0 228-243:73.0	805	1.66e-96	158	0.6667	153	0.9684	250252 No KEGG functional class	25	243	jgi|NeoGfMa1|563277|estExt_Genemark4.C_3_t30058	25	237	Neocallimastix sp. Gf-Ma3-1 v1.0	NeoGfMa1_GeneCatalog_proteins_20201119.aa
NeoGfMa1|390289	25-166:720.0 228-243:77.0	797	2.07e-95	158	0.6667	152	0.962	250252 No KEGG functional class	25	243	jgi|NeoGfMa1|390289|estExt_Genewise1Plus.C_3_t40124	25	237	Neocallimastix sp. Gf-Ma3-1 v1.0	NeoGfMa1_GeneCatalog_proteins_20201119.aa
NeoGfMa1|352545	25-164:708.0 228-243:65.0	773	4e-92	156	0.6582	145	0.9295	250252 No KEGG functional class	25	243	jgi|NeoGfMa1|352545|estExt_Genewise1.C_3_t40173	25	237	Neocallimastix sp. Gf-Ma3-1 v1.0	NeoGfMa1_GeneCatalog_proteins_20201119.aa
Pecora1|10207	1-85:314.0 86-112:77.0	391	2.82e-42	112	0.4746	69	0.6161	275965 No KEGG functional class	1	112	jgi|Pecora1|10207|allA10468	1	108	Pecoramyces sp. F1	Pecora1_ExternalModels_proteins_2021-11-19.fasta
NeoWI3_1|896646	1-84:366.0 86-112:90.0	456	4.06e-51	111	0.5388	83	0.7477	275965 No KEGG functional class	1	112	jgi|NeoWI3_1|896646|fgenesh2_kg.6___447___TRINITY_DN12651_c5_g2_i2	1	109	Neocallimastix sp. WI3-B v1.0	NeoWI3_1_GeneCatalog_proteins_20201119.aa
NeoWI3_1|489148	1-112:568.0	568	3.76e-72	112	0.8	103	0.9196	275965 No KEGG functional class	1	112	jgi|NeoWI3_1|489148|e_gw1.25.83.1	1	112	Neocallimastix sp. WI3-B v1.0	NeoWI3_1_GeneCatalog_proteins_20201119.aa
Neosp1|703516	1-112:463.0	463	1.54e-57	112	0.5411	81	0.7232	275965 No KEGG functional class	1	112	jgi|Neosp1|703516|fgenesh2_kg.110_#_39_#_Locus1331v1rpkm82.06	1	112	Neocallimastix californiae G1 v1.0	Neosp1_GeneCatalog_proteins_20170918.aa
Neosp1|275965	1-129:615.0	615	6.26e-79	129	1	116	0.8992	275965 No KEGG functional class	1	129	jgi|Neosp1|275965|CE275964_4339	1	129	Neocallimastix californiae G1 v1.0	Neosp1_GeneCatalog_proteins_20170918.aa
Neolan1|1738742	1-112:463.0	463	2.06e-57	112	0.5411	81	0.7232	275965 No KEGG functional class	1	112	jgi|Neolan1|1738742|fgenesh2_kg.152___344___TRINITY_DN159_c0_g2_i1	1	112	Neocallimastix lanati v1.0	Neolan1_GeneCatalog_proteins_20200610.aa
Neolan1|989043	1-112:609.0	609	5.86e-78	112	0.4706	112	1	275965 No KEGG functional class	1	112	jgi|Neolan1|989043|estExt_Genewise1.C_32_t10465	1	112	Neocallimastix lanati v1.0	Neolan1_GeneCatalog_proteins_20200610.aa
NeoGfMa1|554061	1-99:511.0	511	3.99e-64	99	0.4459	92	0.9293	275965 No KEGG functional class	1	99	jgi|NeoGfMa1|554061|fgenesh1_pm.27_#_121	1	99	Neocallimastix sp. Gf-Ma3-1 v1.0	NeoGfMa1_GeneCatalog_proteins_20201119.aa
NeoGfMa1|355894	1-84:366.0 86-112:90.0	456	4.11e-51	111	0.5388	83	0.7477	275965 No KEGG functional class	1	112	jgi|NeoGfMa1|355894|estExt_Genewise1.C_6_t30365	1	109	Neocallimastix sp. Gf-Ma3-1 v1.0	NeoGfMa1_GeneCatalog_proteins_20201119.aa
Anasp1|290872	5-112:320.0	320	1.38e-37	108	0.6667	54	0.5	275965 No KEGG functional class	5	112	jgi|Anasp1|290872|estExt_Genemark1.C_390049	6	113	Anaeromyces robustus v1.0	Anasp1_GeneCatalog_proteins_20160330.aa
Piromy_p0_1|294411	284-463:651.0 170-279:456.0 74-118:148.0 20-44:91.0 150-167:84.0 121-145:81.0 53-72:60.0	1571	2.95e-178	423	0.8868	291	0.6879	286880 No KEGG functional class	20	463	jgi|Piromy_p0_1|294411|e_gw1.9.4103.1	21	469	Piromyces sp. UH3-1 v2.0	Piromy_p0_1_GeneCatalog_proteins_20200513.aa
Pecora1|15240	85-273:771.0 275-452:761.0	1532	0	367	0.2347	286	0.7793	286880 No KEGG functional class	85	452	jgi|Pecora1|15240|allA15992	2	367	Pecoramyces sp. F1	Pecora1_ExternalModels_proteins_2021-11-19.fasta
Pecora1|15184	351-451:255.0 286-357:198.0 110-171:179.0 233-283:119.0 74-106:89.0 23-65:80.0 170-193:62.0 191-244:112.0	1094	1.76e-98	440	0.5116	210	0.4773	286880 No KEGG functional class	23	451	jgi|Pecora1|15184|allA15812	242	649	Pecoramyces sp. F1	Pecora1_ExternalModels_proteins_2021-11-19.fasta
Orpsp1_1|1175098	26-273:946.0 275-452:761.0	1707	0	426	0.6265	320	0.7512	286880 No KEGG functional class	26	452	jgi|Orpsp1_1|1175098|evm.model.c7180000052599.1	10	434	Orpinomyces sp.	Orpsp1_1_GeneCatalog_proteins_20140826.aa
Neosp1|286880	20-464:2318.0	2318	0	445	0.9591	445	1	286880 No KEGG functional class	20	464	jgi|Neosp1|286880|CE286879_566	20	464	Neocallimastix californiae G1 v1.0	Neosp1_GeneCatalog_proteins_20170918.aa
Neolan1|203782	20-352:1738.0	1738	0	333	0.9098	333	1	286880 No KEGG functional class	20	352	jgi|Neolan1|203782|CE203781_3657	20	352	Neocallimastix lanati v1.0	Neolan1_GeneCatalog_proteins_20200610.aa
NeoGfMa1|330130	20-463:2103.0	2103	0	444	0.9548	400	0.9009	286880 No KEGG functional class	20	463	jgi|NeoGfMa1|330130|e_gw1.42.118.1	20	463	Neocallimastix sp. Gf-Ma3-1 v1.0	NeoGfMa1_GeneCatalog_proteins_20201119.aa
Caecom1|526461	286-411:293.0 194-271:252.0 106-171:162.0 26-69:104.0 81-106:77.0 170-185:56.0 438-450:45.0	989	1.8e-99	369	0.5034	178	0.4824	286880 No KEGG functional class	26	450	jgi|Caecom1|526461|estExt_fgenesh1_pg.C_1320004	32	458	Caecomyces churrovis A v1.0	Caecom1_GeneCatalog_proteins_20171213.aa
Caecom1|32261	205-436:835.0 97-171:231.0 170-203:113.0 24-49:56.0 48-68:44.0	1279	7.33e-148	388	0.8838	234	0.6031	286880 No KEGG functional class	24	436	jgi|Caecom1|32261|CE32260_601	21	427	Caecomyces churrovis A v1.0	Caecom1_GeneCatalog_proteins_20171213.aa
Anasp1|142496	275-452:637.0 20-165:447.0 166-272:330.0	1414	3.66e-176	431	0.8796	260	0.6032	286880 No KEGG functional class	20	452	jgi|Anasp1|142496|CE142495_1059	20	451	Anaeromyces robustus v1.0	Anasp1_GeneCatalog_proteins_20160330.aa
Pecora1|16937	1-236:1113.0	1113	1.62e-145	236	0.7024	205	0.8686	339068 No KEGG functional class	1	236	jgi|Pecora1|16937|allA17733	1	236	Pecoramyces sp. F1	Pecora1_ExternalModels_proteins_2021-11-19.fasta
Orpsp1_1|1174880	1-236:1121.0	1121	1.08e-146	236	0.7045	206	0.8729	339068 No KEGG functional class	1	236	jgi|Orpsp1_1|1174880|evm.model.c7180000051802.1	1	236	Orpinomyces sp.	Orpsp1_1_GeneCatalog_proteins_20140826.aa
NeoWI3_1|815471	1-236:1134.0	1134	3.54e-148	236	0.9793	206	0.8729	339068 No KEGG functional class	1	236	jgi|NeoWI3_1|815471|estExt_fgenesh1_pg.C_780028	1	236	Neocallimastix sp. WI3-B v1.0	NeoWI3_1_GeneCatalog_proteins_20201119.aa
NeoWI3_1|764977	1-236:1203.0	1203	1.1e-157	236	0.6841	223	0.9449	339068 No KEGG functional class	1	236	jgi|NeoWI3_1|764977|estExt_Genemark4.C_490278	1	236	Neocallimastix sp. WI3-B v1.0	NeoWI3_1_GeneCatalog_proteins_20201119.aa
Neosp1|339068	1-236:1264.0	1264	2.93e-166	236	1	236	1	339068 No KEGG functional class	1	236	jgi|Neosp1|339068|gw1.193.132.1	1	236	Neocallimastix californiae G1 v1.0	Neosp1_GeneCatalog_proteins_20170918.aa
Neosp1|333454	17-235:1092.0	1092	1.48e-142	219	0.991	199	0.9087	339068 No KEGG functional class	17	235	jgi|Neosp1|333454|gw1.206.55.1	3	221	Neocallimastix californiae G1 v1.0	Neosp1_GeneCatalog_proteins_20170918.aa
Neolan1|1301273	1-236:1133.0	1133	4.46e-148	236	0.7352	208	0.8814	339068 No KEGG functional class	1	236	jgi|Neolan1|1301273|estExt_fgenesh1_pg.C_30008	1	236	Neocallimastix lanati v1.0	Neolan1_GeneCatalog_proteins_20200610.aa
Neolan1|30025	1-236:1264.0	1264	3.95e-166	236	0.6962	236	1	339068 No KEGG functional class	1	236	jgi|Neolan1|30025|CE30024_16887	1	236	Neocallimastix lanati v1.0	Neolan1_GeneCatalog_proteins_20200610.aa
NeoGfMa1|582810	1-236:1134.0	1134	3.58e-148	236	0.9793	206	0.8729	339068 No KEGG functional class	1	236	jgi|NeoGfMa1|582810|estExt_fgenesh1_pg.C_9_t10031	1	236	Neocallimastix sp. Gf-Ma3-1 v1.0	NeoGfMa1_GeneCatalog_proteins_20201119.aa
NeoGfMa1|419777	1-236:1203.0	1203	1.11e-157	236	0.6841	223	0.9449	339068 No KEGG functional class	1	236	jgi|NeoGfMa1|419777|estExt_Genewise1Plus.C_830104	1	236	Neocallimastix sp. Gf-Ma3-1 v1.0	NeoGfMa1_GeneCatalog_proteins_20201119.aa
Piromy_p0_1|483774	1-279:1135.0 350-395:232.0 302-346:177.0 369-388:98.0 350-365:64.0 328-350:87.0 308-320:59.0	1852	0	442	1.1218	320	0.724	375710 No KEGG functional class	1	395	jgi|Piromy_p0_1|483774|estExt_Genemark4.C_chromosome_5_t20392	1	394	Piromyces sp. UH3-1 v2.0	Piromy_p0_1_GeneCatalog_proteins_20200513.aa
Pirfi3|583007	1-279:1182.0 348-395:219.0 305-348:173.0 369-393:103.0 350-362:68.0 328-345:80.0 308-320:56.0	1881	0	440	1.1253	324	0.7364	375710 No KEGG functional class	1	395	jgi|Pirfi3|583007|fgenesh2_kg.18_#_110_#_Locus171v1rpkm580.00	1	391	Piromyces finnis v3.0	Pirfi3_GeneCatalog_proteins_20160330.aa
PirE2_1|38082	1-277:1162.0 350-395:213.0 305-347:182.0 368-388:98.0 350-362:77.0 328-345:75.0 306-320:63.0	1870	0	433	1.1131	324	0.7483	375710 No KEGG functional class	1	395	jgi|PirE2_1|38082|e_gw1.11.61.1	1	389	Piromyces sp. E2 v1.0	PirE2_1_GeneCatalog_proteins_20110421.aa
PirE2_1|15570	1-280:1118.0 351-395:217.0 306-347:175.0 369-388:94.0 350-361:66.0 328-345:86.0 310-320:62.0	1818	0	428	1.0439	314	0.7336	375710 No KEGG functional class	1	395	jgi|PirE2_1|15570|gm1.14516_g	1	410	Piromyces sp. E2 v1.0	PirE2_1_GeneCatalog_proteins_20110421.aa
Orpsp1_1|1178477	1-279:1121.0 350-395:228.0 304-350:165.0 369-393:100.0 350-363:69.0 328-345:83.0 304-320:59.0	1825	0	446	1.1436	312	0.6996	375710 No KEGG functional class	1	395	jgi|Orpsp1_1|1178477|evm.model.c7180000065466.1	1	390	Orpinomyces sp.	Orpsp1_1_GeneCatalog_proteins_20140826.aa
Orpsp1_1|1175005	1-275:1171.0 350-395:236.0 308-346:141.0 327-345:95.0 309-320:66.0 365-390:92.0 351-363:64.0	1865	0	430	1.067	329	0.7651	375710 No KEGG functional class	1	395	jgi|Orpsp1_1|1175005|evm.model.c7180000052288.1	6	403	Orpinomyces sp.	Orpsp1_1_GeneCatalog_proteins_20140826.aa
Neosp1|375710	1-280:1344.0 301-395:547.0 365-388:94.0 350-365:76.0 328-345:88.0 309-320:66.0	2215	0	445	1.1266	396	0.8899	375710 No KEGG functional class	1	395	jgi|Neosp1|375710|estExt_Genewise1.C_90199	1	395	Neocallimastix californiae G1 v1.0	Neosp1_GeneCatalog_proteins_20170918.aa
Caecom1|209919	1-280:1140.0 350-395:198.0 301-344:154.0 369-392:89.0 350-365:72.0 327-345:88.0 303-320:64.0	1805	0	447	1.1037	309	0.6913	375710 No KEGG functional class	1	395	jgi|Caecom1|209919|CE209918_5216	1	405	Caecomyces churrovis A v1.0	Caecom1_GeneCatalog_proteins_20171213.aa
Anasp1|326982	5-279:1117.0 350-395:227.0 329-348:100.0 310-321:69.0 328-345:96.0 1-30:67.0 309-320:58.0 369-388:85.0 351-368:69.0	1888	0	451	1.1447	331	0.7339	375710 No KEGG functional class	1	395	jgi|Anasp1|326982|fgenesh2_kg.102_#_4_#_Locus3813v1rpkm9.91	1	394	Anaeromyces robustus v1.0	Anasp1_GeneCatalog_proteins_20160330.aa
Anasp1|2620	5-279:1065.0 328-395:318.0 308-320:68.0 369-391:84.0 350-364:62.0 328-345:81.0 310-320:62.0	1740	0	423	1.0874	302	0.7139	375710 No KEGG functional class	5	395	jgi|Anasp1|2620|CE2619_94195	6	389	Anaeromyces robustus v1.0	Anasp1_GeneCatalog_proteins_20160330.aa
Pirfi3|583814	84-461:1588.0	1588	0	378	0.8381	280	0.7407	377127 No KEGG functional class	84	461	jgi|Pirfi3|583814|fgenesh2_kg.23_#_136_#_Locus976v1rpkm40.21	1	378	Piromyces finnis v3.0	Pirfi3_GeneCatalog_proteins_20160330.aa
Pirfi3|403078	21-206:715.0 216-330:462.0 336-460:437.0	1614	0	426	0.8288	289	0.6784	377127 No KEGG functional class	21	460	jgi|Pirfi3|403078|estExt_fgenesh1_pm.C_90217	21	462	Piromyces finnis v3.0	Pirfi3_GeneCatalog_proteins_20160330.aa
PirE2_1|11239	81-461:1555.0 21-70:187.0	1742	0	431	0.8056	312	0.7239	377127 No KEGG functional class	21	461	jgi|PirE2_1|11239|gm1.10185_g	21	447	Piromyces sp. E2 v1.0	PirE2_1_GeneCatalog_proteins_20110421.aa
PirE2_1|4038	21-400:1499.0 410-461:193.0	1692	0	432	0.8166	305	0.706	377127 No KEGG functional class	21	461	jgi|PirE2_1|4038|gm1.2984_g	21	449	Piromyces sp. E2 v1.0	PirE2_1_GeneCatalog_proteins_20110421.aa
Orpsp1_1|1182574	21-348:1437.0 345-464:503.0	1940	0	448	0.8485	345	0.7701	377127 No KEGG functional class	21	464	jgi|Orpsp1_1|1182574|evm.model.c7180000081862.1	21	466	Orpinomyces sp.	Orpsp1_1_GeneCatalog_proteins_20140826.aa
Orpsp1_1|1179419	21-461:1842.0	1842	0	441	0.3503	335	0.7596	377127 No KEGG functional class	21	461	jgi|Orpsp1_1|1179419|evm.model.c7180000069266.1	21	461	Orpinomyces sp.	Orpsp1_1_GeneCatalog_proteins_20140826.aa
Caecom1|521168	21-314:1179.0 317-416:405.0 417-461:178.0	1762	0	439	0.5515	314	0.7153	377127 No KEGG functional class	21	461	jgi|Caecom1|521168|estExt_fgenesh1_pg.C_20043	21	463	Caecomyces churrovis A v1.0	Caecom1_GeneCatalog_proteins_20171213.aa
Caecom1|442546	21-314:1184.0 317-416:402.0 417-461:188.0	1774	0	439	0.7967	318	0.7244	377127 No KEGG functional class	21	461	jgi|Caecom1|442546|fgenesh1_kg.2_#_85_#_TRINITY_DN7973_c1_g1_i1	21	463	Caecomyces churrovis A v1.0	Caecom1_GeneCatalog_proteins_20171213.aa
Anasp1|282730	21-289:991.0 298-400:397.0 409-461:204.0	1592	0	425	0.8049	293	0.6894	377127 No KEGG functional class	21	461	jgi|Anasp1|282730|gm1.8996_g	21	438	Anaeromyces robustus v1.0	Anasp1_GeneCatalog_proteins_20160330.aa
Anasp1|267478	21-461:1896.0	1896	0	441	0.5705	343	0.7778	377127 No KEGG functional class	21	461	jgi|Anasp1|267478|estExt_fgenesh1_pg.C_890017	21	461	Anaeromyces robustus v1.0	Anasp1_GeneCatalog_proteins_20160330.aa
Pirfi3|585503	1-424:1764.0 468-510:178.0 436-468:133.0 465-506:150.0 436-464:97.0 419-437:50.0	2372	0	590	1.1569	408	0.6915	379692 No KEGG functional class	1	510	jgi|Pirfi3|585503|fgenesh2_kg.38_#_11_#_Locus393v1rpkm150.23	1	509	Piromyces finnis v3.0	Pirfi3_GeneCatalog_proteins_20160330.aa
PirE2_1|11019	1-424:1799.0 436-466:97.0 468-491:95.0 464-506:145.0	2136	0	522	1.0631	379	0.7261	379692 No KEGG functional class	1	506	jgi|PirE2_1|11019|gm1.9965_g	1	490	Piromyces sp. E2 v1.0	PirE2_1_GeneCatalog_proteins_20110421.aa
Pecora1|12187	32-328:1088.0 333-410:242.0 475-511:158.0 436-471:113.0 408-437:91.0 470-508:141.0	1833	0	517	1.0682	314	0.6074	379692 No KEGG functional class	32	511	jgi|Pecora1|12187|allA12739	3	483	Pecoramyces sp. F1	Pecora1_ExternalModels_proteins_2021-11-19.fasta
Pecora1|11937	1-415:1957.0 422-511:397.0 436-464:107.0 406-425:55.0 425-437:50.0 481-506:110.0	2676	0	593	1.1492	464	0.7825	379692 No KEGG functional class	1	511	jgi|Pecora1|11937|allA12318	1	515	Pecoramyces sp. F1	Pecora1_ExternalModels_proteins_2021-11-19.fasta
Neosp1|706678	1-430:2007.0 468-512:222.0 395-469:206.0 481-509:114.0 408-429:59.0 436-461:110.0	2718	0	627	1.2151	486	0.7751	379692 No KEGG functional class	1	512	jgi|Neosp1|706678|fgenesh2_kg.226_#_9_#_Locus3422v1rpkm20.49	1	516	Neocallimastix californiae G1 v1.0	Neosp1_GeneCatalog_proteins_20170918.aa
Neosp1|702500	1-410:1403.0 436-471:137.0 475-506:137.0 407-438:58.0 475-511:154.0 436-470:120.0 469-506:171.0 13-46:44.0 454-470:41.0 436-464:104.0	2369	0	700	1.2153	399	0.57	379692 No KEGG functional class	1	511	jgi|Neosp1|702500|fgenesh2_kg.89_#_8_#_Locus1778v1rpkm54.00	1	576	Neocallimastix californiae G1 v1.0	Neosp1_GeneCatalog_proteins_20170918.aa
Neosp1|379692	1-512:2766.0 481-509:124.0 436-464:124.0 471-484:50.0 425-438:50.0	3114	0	598	1.168	557	0.9314	379692 No KEGG functional class	1	512	jgi|Neosp1|379692|estExt_Genewise1.C_440061	1	512	Neocallimastix californiae G1 v1.0	Neosp1_GeneCatalog_proteins_20170918.aa
Caecom1|421937	1-407:1716.0 471-510:166.0 436-471:130.0 408-437:74.0 464-506:148.0 436-461:93.0 420-437:58.0	2385	0	600	1.1278	409	0.6817	379692 No KEGG functional class	1	510	jgi|Caecom1|421937|estExt_Genewise1.C_3230019	3	530	Caecomyces churrovis A v1.0	Caecom1_GeneCatalog_proteins_20171213.aa
Anasp1|325259	1-425:1882.0 467-511:218.0 436-469:143.0 422-437:69.0 444-506:166.0 436-464:113.0	2591	0	612	1.186	448	0.732	379692 No KEGG functional class	1	511	jgi|Anasp1|325259|fgenesh2_kg.29_#_21_#_Locus592v1rpkm185.08	1	516	Anaeromyces robustus v1.0	Anasp1_GeneCatalog_proteins_20160330.aa
Anasp1|217060	1-415:1519.0 475-512:173.0 436-469:135.0 472-506:139.0 436-461:94.0 406-437:73.0	2133	0	580	1.1111	359	0.619	379692 No KEGG functional class	1	512	jgi|Anasp1|217060|estExt_Genewise1.C_360018	1	522	Anaeromyces robustus v1.0	Anasp1_GeneCatalog_proteins_20160330.aa
Pirfi3|585678	175-569:2077.0 22-65:210.0 111-146:158.0 76-104:121.0 63-76:73.0 65-105:156.0 29-58:106.0 65-101:91.0 121-146:84.0 111-122:69.0	3145	0	664	1.1711	522	0.7861	381575 No KEGG functional class	22	569	jgi|Pirfi3|585678|fgenesh2_kg.40_#_22_#_Locus479v1rpkm109.37	19	567	Piromyces finnis v3.0	Pirfi3_GeneCatalog_proteins_20160330.aa
PirE2_1|69191	179-395:1044.0 395-567:832.0 99-124:91.0	1967	0	416	0.9306	333	0.8005	381575 No KEGG functional class	99	567	jgi|PirE2_1|69191|estExt_fgenesh1_pg.C_1060015	12	446	Piromyces sp. E2 v1.0	PirE2_1_GeneCatalog_proteins_20110421.aa
PirE2_1|60245	211-395:978.0 396-569:762.0 194-202:47.0 181-189:46.0	1833	0	377	0.9617	318	0.8435	381575 No KEGG functional class	181	569	jgi|PirE2_1|60245|fgenesh1_pg.96_#_3	5	392	Piromyces sp. E2 v1.0	PirE2_1_GeneCatalog_proteins_20110421.aa
PirE2_1|21030	175-395:1189.0 395-569:888.0 22-104:365.0 105-146:155.0 65-146:246.0 66-104:157.0 31-58:82.0	3082	0	670	1.1817	515	0.7687	381575 No KEGG functional class	22	569	jgi|PirE2_1|21030|estExt_Genemark1.C_2650011	19	567	Piromyces sp. E2 v1.0	PirE2_1_GeneCatalog_proteins_20110421.aa
Orpsp1_1|1181999	175-394:1092.0 76-146:265.0 395-446:244.0 29-102:258.0	1859	0	417	1.127	306	0.7338	381575 No KEGG functional class	29	446	jgi|Orpsp1_1|1181999|evm.model.c7180000079479.1	1	370	Orpinomyces sp.	Orpsp1_1_GeneCatalog_proteins_20140826.aa
Orpsp1_1|1178757	175-395:1222.0 395-569:941.0 22-76:269.0 110-146:169.0 76-104:112.0 66-125:155.0 121-146:84.0 66-111:129.0 29-56:109.0	3190	0	677	1.1961	534	0.7888	381575 No KEGG functional class	22	569	jgi|Orpsp1_1|1178757|evm.model.c7180000066629.1	21	566	Orpinomyces sp.	Orpsp1_1_GeneCatalog_proteins_20140826.aa
Neosp1|707399	175-569:2136.0 58-108:221.0 22-65:203.0 108-146:182.0 61-111:153.0 31-59:81.0 112-146:134.0 63-101:91.0	3201	0	683	1.1982	539	0.7892	381575 No KEGG functional class	22	569	jgi|Neosp1|707399|fgenesh2_kg.262_#_17_#_Locus3186v1rpkm22.86	18	570	Neocallimastix californiae G1 v1.0	Neosp1_GeneCatalog_proteins_20170918.aa
Neosp1|448341	175-569:2162.0 22-66:207.0 63-108:193.0 108-146:186.0 112-146:139.0 63-101:92.0 62-110:138.0 22-59:91.0	3208	0	686	1.2056	544	0.793	381575 No KEGG functional class	22	569	jgi|Neosp1|448341|estExt_Genewise1Plus.C_40166	18	569	Neocallimastix californiae G1 v1.0	Neosp1_GeneCatalog_proteins_20170918.aa
Neosp1|381575	175-569:2245.0 22-146:761.0 61-146:224.0 22-101:216.0	3446	0	686	1.2056	594	0.8659	381575 No KEGG functional class	22	569	jgi|Neosp1|381575|estExt_Genewise1.C_670137	16	569	Neocallimastix californiae G1 v1.0	Neosp1_GeneCatalog_proteins_20170918.aa
Anasp1|284628	175-395:1189.0 395-567:860.0 22-76:258.0 76-105:122.0 106-132:102.0 131-146:82.0 65-122:164.0 121-146:80.0 29-56:96.0 75-107:84.0	3037	0	667	1.1826	508	0.7616	381575 No KEGG functional class	22	567	jgi|Anasp1|284628|gm1.10894_g	19	564	Anaeromyces robustus v1.0	Anasp1_GeneCatalog_proteins_20160330.aa
Piromy_p0_1|529749	227-474:1035.0 1-98:432.0 180-231:201.0 104-144:179.0 29-98:231.0 323-394:163.0 411-475:126.0 16-29:44.0 254-322:138.0 180-234:136.0 104-144:121.0 72-98:97.0 62-73:45.0 29-57:111.0 11-33:74.0	3133	0	916	1.9163	530	0.5786	382578 No KEGG functional class	1	475	jgi|Piromy_p0_1|529749|fgenesh2_kg.chromosome_4___3243___TRINITY_DN726_c0_g1_i1	1	478	Piromyces sp. UH3-1 v2.0	Piromy_p0_1_GeneCatalog_proteins_20200513.aa
Pirfi3|586096	180-474:1238.0 1-100:409.0 104-147:199.0 29-98:213.0 331-395:151.0 411-474:142.0 19-34:50.0 180-234:140.0 104-144:135.0 254-322:133.0 72-98:74.0 29-62:102.0 19-33:64.0 118-144:101.0	3151	0	922	1.937	535	0.5803	382578 No KEGG functional class	1	474	jgi|Pirfi3|586096|fgenesh2_kg.45_#_5_#_Locus104v1rpkm1669.34	1	476	Piromyces finnis v3.0	Pirfi3_GeneCatalog_proteins_20160330.aa
PirE2_1|67985	180-478:1316.0 1-103:467.0 107-147:192.0 323-395:156.0 104-144:134.0 411-475:134.0 72-98:84.0 62-73:45.0 254-318:145.0 180-234:141.0 56-98:118.0 29-55:84.0 19-29:48.0 29-55:101.0 6-33:71.0 118-144:105.0	3341	0	944	1.9832	570	0.6038	382578 No KEGG functional class	1	478	jgi|PirE2_1|67985|estExt_fgenesh1_pm.C_130011	1	476	Piromyces sp. E2 v1.0	PirE2_1_GeneCatalog_proteins_20110421.aa
Pecora1|11889	328-389:237.0 180-257:200.0 285-333:161.0 108-145:155.0 392-441:148.0 1-32:135.0 58-103:133.0 444-475:127.0 29-59:112.0 273-284:49.0 331-395:177.0 103-144:155.0 60-107:144.0 444-474:101.0 62-102:147.0 180-232:127.0 29-61:98.0 287-321:91.0 17-29:62.0 108-147:141.0 367-417:69.0 29-55:95.0 15-32:60.0	2924	1.85e-147	927	1.9272	494	0.5329	382578 No KEGG functional class	1	475	jgi|Pecora1|11889|allA12411	1	480	Pecoramyces sp. F1	Pecora1_ExternalModels_proteins_2021-11-19.fasta
Orpsp1_1|1179413	332-389:235.0 180-257:200.0 285-333:165.0 108-145:155.0 392-441:148.0 58-103:133.0 444-475:127.0 29-59:112.0 273-284:49.0 331-395:177.0 103-144:156.0 72-107:115.0 444-474:101.0 62-102:147.0 180-232:127.0 29-61:98.0 287-321:91.0 17-29:63.0 29-55:95.0 367-417:69.0 15-32:60.0 116-147:109.0	2732	3.89e-134	871	1.9143	462	0.5304	382578 No KEGG functional class	15	475	jgi|Orpsp1_1|1179413|evm.model.c7180000069236.1	1	455	Orpinomyces sp.	Orpsp1_1_GeneCatalog_proteins_20140826.aa
NeoWI3_1|888976	180-335:701.0 1-107:522.0 388-478:406.0 331-388:274.0 103-144:209.0 323-395:162.0 411-475:139.0 104-144:128.0 72-98:92.0 62-73:44.0 254-318:145.0 58-100:125.0 180-232:122.0 29-55:88.0 19-29:49.0 29-55:113.0 19-33:60.0 118-144:105.0 108-123:65.0	3549	0	956	1.9958	599	0.6266	382578 No KEGG functional class	1	478	jgi|NeoWI3_1|888976|fgenesh2_kg.1___1721___TRINITY_DN12967_c3_g1_i1	1	479	Neocallimastix sp. WI3-B v1.0	NeoWI3_1_GeneCatalog_proteins_20201119.aa
Neosp1|382578	180-478:1588.0 1-147:852.0 323-395:153.0 411-475:143.0 58-98:121.0 29-55:93.0 18-29:44.0 254-318:143.0 180-234:123.0 104-144:121.0 72-98:93.0 62-73:44.0 118-144:107.0 29-55:107.0	3732	0	918	1.9205	656	0.7146	382578 No KEGG functional class	1	478	jgi|Neosp1|382578|estExt_Genewise1.C_810144	1	478	Neocallimastix californiae G1 v1.0	Neosp1_GeneCatalog_proteins_20170918.aa
Neolan1|1022217	180-478:1588.0 1-147:852.0 323-395:153.0 411-475:143.0 58-98:121.0 29-55:93.0 18-29:44.0 254-318:143.0 180-234:123.0 104-144:121.0 72-98:93.0 62-73:44.0 118-144:107.0 29-55:107.0	3732	0	918	1.9205	656	0.7146	382578 No KEGG functional class	1	478	jgi|Neolan1|1022217|estExt_Genewise1Plus.C_2_t10173	1	478	Neocallimastix lanati v1.0	Neolan1_GeneCatalog_proteins_20200610.aa
NeoGfMa1|561621	180-335:701.0 1-107:522.0 388-478:406.0 331-388:274.0 103-144:210.0 323-395:162.0 411-475:139.0 104-144:128.0 72-98:92.0 62-73:44.0 254-318:145.0 58-100:125.0 180-232:122.0 29-55:88.0 19-29:49.0 29-55:113.0 19-33:59.0 118-144:105.0 108-123:65.0	3549	0	956	1.9958	599	0.6266	382578 No KEGG functional class	1	478	jgi|NeoGfMa1|561621|estExt_Genemark4.C_1_t10396	1	479	Neocallimastix sp. Gf-Ma3-1 v1.0	NeoGfMa1_GeneCatalog_proteins_20201119.aa
Caecom1|522642	328-440:426.0 1-59:232.0 257-333:213.0 180-260:198.0 105-145:169.0 444-475:133.0 58-102:130.0 72-144:226.0 321-395:180.0 417-474:134.0 394-409:46.0 180-234:147.0 62-98:135.0 29-57:102.0 286-321:98.0 254-282:60.0 16-32:55.0	2684	1.01e-166	873	1.778	463	0.5304	382578 No KEGG functional class	1	475	jgi|Caecom1|522642|estExt_fgenesh1_pg.C_230049	5	491	Caecomyces churrovis A v1.0	Caecom1_GeneCatalog_proteins_20171213.aa
NeoWI3_1|808606	139-594:2082.0 14-118:582.0	2664	0	561	0.8919	471	0.8396	382908 No KEGG functional class	14	594	jgi|NeoWI3_1|808606|estExt_fgenesh1_pg.C_270026	51	629	Neocallimastix sp. WI3-B v1.0	NeoWI3_1_GeneCatalog_proteins_20201119.aa
NeoWI3_1|540675	139-594:2378.0 1-118:646.0 23-35:72.0 43-72:65.0	3161	0	617	1.0387	560	0.9076	382908 No KEGG functional class	1	594	jgi|NeoWI3_1|540675|estExt_Genewise1.C_27_t10047	1	594	Neocallimastix sp. WI3-B v1.0	NeoWI3_1_GeneCatalog_proteins_20201119.aa
Neosp1|705908	139-594:1952.0 1-116:537.0	2489	0	572	0.9778	432	0.7552	382908 No KEGG functional class	1	594	jgi|Neosp1|705908|fgenesh2_kg.193_#_17_#_Locus1616v1rpkm61.90	1	584	Neocallimastix californiae G1 v1.0	Neosp1_GeneCatalog_proteins_20170918.aa
Neosp1|670098	139-594:2163.0 1-118:692.0	2855	0	574	0.9663	511	0.8902	382908 No KEGG functional class	1	594	jgi|Neosp1|670098|estExt_fgenesh1_pg.C_860047	1	594	Neocallimastix californiae G1 v1.0	Neosp1_GeneCatalog_proteins_20170918.aa
Neosp1|513728	139-594:1989.0 19-114:475.0 6-19:42.0	2506	0	566	0.9481	432	0.7633	382908 No KEGG functional class	6	594	jgi|Neosp1|513728|fgenesh1_pg.200_#_47	5	597	Neocallimastix californiae G1 v1.0	Neosp1_GeneCatalog_proteins_20170918.aa
Neosp1|382908	139-594:2482.0 1-118:694.0	3176	0	574	0.9663	574	1	382908 No KEGG functional class	1	594	jgi|Neosp1|382908|estExt_Genewise1.C_860118	1	594	Neocallimastix californiae G1 v1.0	Neosp1_GeneCatalog_proteins_20170918.aa
Neolan1|1718597	139-594:1952.0 1-116:537.0	2489	0	572	0.9778	432	0.7552	382908 No KEGG functional class	1	594	jgi|Neolan1|1718597|fgenesh2_kg.105___52___TRINITY_DN2122_c0_g2_i5	1	584	Neocallimastix lanati v1.0	Neolan1_GeneCatalog_proteins_20200610.aa
Neolan1|1428634	139-594:1989.0 19-114:479.0	2468	0	552	0.9246	425	0.7699	382908 No KEGG functional class	19	594	jgi|Neolan1|1428634|estExt_Genemark4.C_690156	28	597	Neocallimastix lanati v1.0	Neolan1_GeneCatalog_proteins_20200610.aa
Neolan1|101020	139-594:2482.0 1-118:694.0	3176	0	574	0.9663	574	1	382908 No KEGG functional class	1	594	jgi|Neolan1|101020|CE101019_3933	1	594	Neocallimastix lanati v1.0	Neolan1_GeneCatalog_proteins_20200610.aa
Neolan1|101009	139-594:2160.0 1-118:692.0	2852	0	574	0.9663	510	0.8885	382908 No KEGG functional class	1	594	jgi|Neolan1|101009|CE101008_2209	1	594	Neocallimastix lanati v1.0	Neolan1_GeneCatalog_proteins_20200610.aa
Pirfi3|348526	189-732:2002.0 1-82:318.0 106-158:197.0 75-102:107.0 169-191:72.0 73-127:189.0 120-147:105.0 63-111:190.0 36-62:75.0 118-156:128.0 28-55:108.0	3491	0	956	1.3132	582	0.6088	383322 No KEGG functional class	1	732	jgi|Pirfi3|348526|estExt_Genewise1Plus.C_11_t20127	1	727	Piromyces finnis v3.0	Pirfi3_GeneCatalog_proteins_20160330.aa
Pirfi3|348520	198-729:1962.0 1-82:306.0 106-172:213.0 75-102:111.0 73-129:190.0 126-147:102.0 145-191:80.0 63-110:179.0 36-62:82.0 118-156:131.0 28-55:113.0	3469	0	977	1.3384	590	0.6039	383322 No KEGG functional class	1	729	jgi|Pirfi3|348520|estExt_Genewise1Plus.C_11_t20121	1	725	Piromyces finnis v3.0	Pirfi3_GeneCatalog_proteins_20160330.aa
Pirfi3|341733	198-730:2027.0 61-126:237.0 1-62:223.0 126-163:94.0 105-156:182.0 73-100:91.0 148-191:83.0 327-355:43.0 28-81:154.0 84-111:85.0	3219	0	934	1.269	542	0.5803	383322 No KEGG functional class	1	730	jgi|Pirfi3|341733|estExt_Genewise1Plus.C_1_t50006	1	735	Piromyces finnis v3.0	Pirfi3_GeneCatalog_proteins_20160330.aa
Pirfi3|337684	198-730:1991.0 1-62:223.0 61-107:161.0 129-164:93.0 103-126:80.0 168-191:80.0 105-154:177.0 73-100:93.0 28-55:96.0 81-110:88.0 67-81:72.0	3154	0	877	1.1835	532	0.6066	383322 No KEGG functional class	1	730	jgi|Pirfi3|337684|estExt_Genewise1.C_670115	1	740	Piromyces finnis v3.0	Pirfi3_GeneCatalog_proteins_20160330.aa
PirE2_1|15589	198-730:2023.0 125-158:103.0 75-102:84.0 155-191:79.0 112-123:65.0 81-111:99.0 40-55:62.0 67-78:61.0	2576	0	703	1.0652	440	0.6259	383322 No KEGG functional class	40	730	jgi|PirE2_1|15589|gm1.14535_g	4	659	Piromyces sp. E2 v1.0	PirE2_1_GeneCatalog_proteins_20110421.aa
PirE2_1|10097	151-729:2057.0 1-82:308.0 101-149:189.0 75-102:108.0 73-127:178.0 120-147:110.0 63-111:191.0 18-55:85.0 118-156:126.0 28-55:104.0	3456	0	975	1.314	586	0.601	383322 No KEGG functional class	1	729	jgi|PirE2_1|10097|gm1.9043_g	1	737	Piromyces sp. E2 v1.0	PirE2_1_GeneCatalog_proteins_20110421.aa
PirE2_1|10096	198-730:2020.0 19-82:264.0 125-153:116.0 151-191:73.0 75-94:65.0 73-127:179.0 120-139:65.0 81-119:112.0 18-49:57.0 118-154:125.0	3076	0	870	1.2482	526	0.6046	383322 No KEGG functional class	18	730	jgi|PirE2_1|10096|gm1.9042_g	2	691	Piromyces sp. E2 v1.0	PirE2_1_GeneCatalog_proteins_20110421.aa
PirE2_1|10083	198-729:2021.0 1-82:286.0 105-163:205.0 75-111:110.0 61-111:208.0 21-55:84.0 150-191:71.0 73-127:167.0 120-158:116.0 118-145:105.0	3373	0	960	1.2851	565	0.5885	383322 No KEGG functional class	1	729	jgi|PirE2_1|10083|gm1.9029_g	1	743	Piromyces sp. E2 v1.0	PirE2_1_GeneCatalog_proteins_20110421.aa
PirE2_1|10082	462-729:936.0 198-432:833.0 1-111:410.0 151-191:80.0 73-166:315.0 118-156:115.0 28-55:106.0	2795	0	816	1.2289	481	0.5895	383322 No KEGG functional class	1	729	jgi|PirE2_1|10082|gm1.9028_g	1	659	Piromyces sp. E2 v1.0	PirE2_1_GeneCatalog_proteins_20110421.aa
Anasp1|223704	189-729:1839.0 57-161:385.0 1-61:211.0 28-110:260.0 153-191:98.0 111-154:178.0 73-110:95.0 118-153:103.0	3169	0	947	1.3008	534	0.5639	383322 No KEGG functional class	1	729	jgi|Anasp1|223704|estExt_Genewise1.C_2660040	1	724	Anaeromyces robustus v1.0	Anasp1_GeneCatalog_proteins_20160330.aa
Pecora1|13592	1-395:1760.0 274-359:308.0 317-395:288.0 358-395:149.0 276-317:146.0	2651	0	640	1.5311	453	0.7078	383415 No KEGG functional class	1	395	jgi|Pecora1|13592|allA14086	1	400	Pecoramyces sp. F1	Pecora1_ExternalModels_proteins_2021-11-19.fasta
Orpsp1_1|1175221	2-313:1175.0 359-395:118.0 328-355:102.0 312-330:65.0 317-355:124.0 369-395:102.0 353-370:65.0 319-354:105.0 287-314:96.0 268-289:61.0 355-395:138.0 274-313:106.0	2257	6.32e-178	647	1.4839	391	0.6043	383415 No KEGG functional class	2	395	jgi|Orpsp1_1|1175221|evm.model.c7180000053075.1	3	410	Orpinomyces sp.	Orpsp1_1_GeneCatalog_proteins_20140826.aa
NeoWI3_1|622731	1-395:2010.0 317-395:317.0 276-354:299.0 358-395:155.0 276-317:144.0	2925	0	633	1.529	498	0.7867	383415 No KEGG functional class	1	395	jgi|NeoWI3_1|622731|fgenesh1_pg.43_#_207	1	399	Neocallimastix sp. WI3-B v1.0	NeoWI3_1_GeneCatalog_proteins_20201119.aa
NeoWI3_1|548553	9-313:1183.0 356-395:148.0 328-355:97.0 319-330:54.0 317-359:137.0 369-395:93.0 358-370:61.0 328-355:105.0 369-395:91.0 358-370:59.0 316-359:132.0 287-314:94.0 355-396:153.0 276-314:129.0	2536	5.75e-178	689	1.4061	427	0.6197	383415 No KEGG functional class	9	396	jgi|NeoWI3_1|548553|estExt_Genewise1.C_43_t10470	10	471	Neocallimastix sp. WI3-B v1.0	NeoWI3_1_GeneCatalog_proteins_20201119.aa
Neosp1|456489	9-313:1184.0 356-395:135.0 328-355:109.0 316-330:64.0 317-364:139.0 369-395:92.0 358-370:61.0 287-314:97.0 328-355:94.0 319-330:57.0 358-396:152.0 316-359:123.0 274-302:71.0 276-314:120.0 369-395:89.0 354-370:58.0	2645	1.71e-179	739	1.499	443	0.5995	383415 No KEGG functional class	9	396	jgi|Neosp1|456489|estExt_Genewise1Plus.C_910059	10	475	Neocallimastix californiae G1 v1.0	Neosp1_GeneCatalog_proteins_20170918.aa
Neosp1|383415	1-396:2163.0 317-395:319.0 276-354:319.0 276-317:146.0 358-395:145.0	3092	0	634	1.5167	537	0.847	383415 No KEGG functional class	1	396	jgi|Neosp1|383415|estExt_Genewise1.C_910068	1	399	Neocallimastix californiae G1 v1.0	Neosp1_GeneCatalog_proteins_20170918.aa
Neolan1|1050239	9-313:1184.0 356-395:135.0 328-355:109.0 316-330:64.0 317-364:139.0 369-395:92.0 358-370:61.0 287-314:97.0 328-355:94.0 319-330:57.0 358-396:152.0 316-359:123.0 274-302:71.0 276-314:120.0 369-395:89.0 354-370:58.0	2645	2.28e-179	739	1.499	443	0.5995	383415 No KEGG functional class	9	396	jgi|Neolan1|1050239|estExt_Genewise1Plus.C_800116	10	475	Neocallimastix lanati v1.0	Neolan1_GeneCatalog_proteins_20200610.aa
Neolan1|1002352	1-396:2163.0 317-395:319.0 276-354:319.0 276-317:146.0 358-395:145.0	3092	0	634	1.5167	537	0.847	383415 No KEGG functional class	1	396	jgi|Neolan1|1002352|estExt_Genewise1.C_800111	1	399	Neocallimastix lanati v1.0	Neolan1_GeneCatalog_proteins_20200610.aa
NeoGfMa1|598070	1-395:2010.0 317-395:317.0 276-354:299.0 358-395:155.0 276-317:144.0	2925	0	633	1.529	498	0.7867	383415 No KEGG functional class	1	395	jgi|NeoGfMa1|598070|estExt_fgenesh1_pm.C_100082	1	399	Neocallimastix sp. Gf-Ma3-1 v1.0	NeoGfMa1_GeneCatalog_proteins_20201119.aa
NeoGfMa1|549639	9-313:1183.0 356-395:148.0 328-355:97.0 319-330:54.0 317-359:137.0 369-395:93.0 358-370:61.0 328-355:105.0 369-395:91.0 358-370:59.0 316-359:132.0 287-314:94.0 355-396:153.0 276-314:129.0	2536	5.74e-178	689	1.4119	427	0.6197	383415 No KEGG functional class	9	396	jgi|NeoGfMa1|549639|fgenesh1_pm.10_#_78	10	471	Neocallimastix sp. Gf-Ma3-1 v1.0	NeoGfMa1_GeneCatalog_proteins_20201119.aa
Pirfi3|580005	371-487:557.0 162-294:513.0 317-366:240.0 490-516:134.0 67-92:125.0 23-55:123.0 527-561:113.0 297-317:71.0 560-572:70.0 115-136:47.0 10-28:41.0 104-136:126.0 71-90:68.0 34-59:81.0 71-109:74.0 22-50:95.0 93-103:41.0	2519	0	654	1.1414	430	0.6575	384271 No KEGG functional class	10	572	jgi|Pirfi3|580005|fgenesh2_kg.4_#_50_#_Locus185v1rpkm497.10	11	573	Piromyces finnis v3.0	Pirfi3_GeneCatalog_proteins_20160330.aa
PirE2_1|48697	180-573:2028.0	2028	0	394	1	358	0.9086	384271 No KEGG functional class	180	573	jgi|PirE2_1|48697|e_gw1.604.1.1	1	394	Piromyces sp. E2 v1.0	PirE2_1_GeneCatalog_proteins_20110421.aa
Orpsp1_1|1190895	162-436:1403.0 98-133:147.0 70-99:113.0 17-45:78.0 44-56:56.0 1-17:55.0 105-139:108.0 73-108:85.0 68-91:108.0 45-60:43.0	2196	0	511	1.1561	379	0.7417	384271 No KEGG functional class	1	436	jgi|Orpsp1_1|1190895|evm.model.d7180000081927.1	1	442	Orpinomyces sp.	Orpsp1_1_GeneCatalog_proteins_20140826.aa
Orpsp1_1|1183248	162-572:2116.0 98-133:147.0 70-99:113.0 68-91:108.0 45-60:43.0 105-139:108.0	2635	0	552	0.8693	463	0.8388	384271 No KEGG functional class	45	572	jgi|Orpsp1_1|1183248|evm.model.c7180000084419.1	17	534	Orpinomyces sp.	Orpsp1_1_GeneCatalog_proteins_20140826.aa
Orpsp1_1|1181943	162-294:535.0 367-487:527.0 317-369:234.0 490-516:141.0 527-557:116.0 23-57:105.0 67-90:90.0 297-317:84.0 560-572:62.0 115-136:61.0 1-26:60.0 104-135:122.0 71-91:75.0 135-141:44.0 71-92:89.0 35-48:64.0	2409	0	602	1.047	411	0.6827	384271 No KEGG functional class	1	572	jgi|Orpsp1_1|1181943|evm.model.c7180000079212.1	1	575	Orpinomyces sp.	Orpsp1_1_GeneCatalog_proteins_20140826.aa
Orpsp1_1|1180068	162-294:541.0 369-487:529.0 317-369:231.0 490-516:141.0 9-59:121.0 527-553:114.0 67-90:95.0 297-317:84.0 560-572:66.0 115-136:64.0 104-135:137.0 71-91:85.0 71-92:92.0 27-59:77.0	2377	0	598	1.0436	410	0.6856	384271 No KEGG functional class	9	572	jgi|Orpsp1_1|1180068|evm.model.c7180000072012.1	10	573	Orpinomyces sp.	Orpsp1_1_GeneCatalog_proteins_20140826.aa
Neosp1|384271	162-573:2301.0 1-141:816.0 111-139:132.0 67-95:132.0 77-92:59.0 31-46:59.0 92-101:43.0 45-54:43.0	3585	0	663	1.1571	623	0.9397	384271 No KEGG functional class	1	573	jgi|Neosp1|384271|estExt_Genewise1.C_1040013	1	573	Neocallimastix californiae G1 v1.0	Neosp1_GeneCatalog_proteins_20170918.aa
Caecom1|625282	250-572:1672.0 162-248:392.0 99-136:161.0 8-57:147.0 68-102:110.0 68-92:109.0 1-22:77.0 33-53:66.0 112-133:74.0 73-88:47.0 90-104:46.0	2901	0	654	1.101	503	0.7691	384271 No KEGG functional class	1	572	jgi|Caecom1|625282|estExt_Genemark1.C_2540017	1	593	Caecomyces churrovis A v1.0	Caecom1_GeneCatalog_proteins_20171213.aa
Anasp1|229961	162-572:2095.0 104-136:151.0 17-57:132.0 68-104:132.0 1-17:58.0 112-139:99.0 90-108:58.0 73-87:48.0 67-92:105.0 45-57:45.0	2923	0	640	1.115	503	0.7859	384271 No KEGG functional class	1	572	jgi|Anasp1|229961|estExt_Genewise1Plus.C_400040	1	572	Anaeromyces robustus v1.0	Anasp1_GeneCatalog_proteins_20160330.aa
Anasp1|222663	370-487:540.0 162-292:510.0 317-369:244.0 490-516:134.0 527-553:112.0 67-120:105.0 23-62:98.0 297-317:89.0 560-572:70.0 1-26:56.0 121-133:41.0 104-133:130.0 71-91:63.0	2192	0	574	0.9965	378	0.6585	384271 No KEGG functional class	1	572	jgi|Anasp1|222663|estExt_Genewise1.C_2090013	1	570	Anaeromyces robustus v1.0	Anasp1_GeneCatalog_proteins_20160330.aa
NeoWI3_1|806159	1-247:1115.0 263-308:68.0	1183	3.19e-148	293	0.9734	230	0.785	388081 No KEGG functional class	1	308	jgi|NeoWI3_1|806159|estExt_fgenesh1_pg.C_18_t10007	1	301	Neocallimastix sp. WI3-B v1.0	NeoWI3_1_GeneCatalog_proteins_20201119.aa
NeoWI3_1|578761	1-247:1109.0 263-308:71.0	1180	8.21e-148	293	0.9734	228	0.7782	388081 No KEGG functional class	1	308	jgi|NeoWI3_1|578761|estExt_Genewise1Plus.C_18_t10014	1	301	Neocallimastix sp. WI3-B v1.0	NeoWI3_1_GeneCatalog_proteins_20201119.aa
NeoWI3_1|566829	1-309:1498.0	1498	0	309	1	291	0.9417	388081 No KEGG functional class	1	309	jgi|NeoWI3_1|566829|estExt_Genewise1Plus.C_6_t10165	1	309	Neocallimastix sp. WI3-B v1.0	NeoWI3_1_GeneCatalog_proteins_20201119.aa
NeoWI3_1|534691	1-247:1119.0 263-308:69.0	1188	6.62e-149	293	0.9734	230	0.785	388081 No KEGG functional class	1	308	jgi|NeoWI3_1|534691|estExt_Genewise1.C_18_t10019	1	301	Neocallimastix sp. WI3-B v1.0	NeoWI3_1_GeneCatalog_proteins_20201119.aa
Neosp1|388081	1-309:1590.0	1590	0	309	1	309	1	388081 No KEGG functional class	1	309	jgi|Neosp1|388081|estExt_Genewise1.C_1850089	1	309	Neocallimastix californiae G1 v1.0	Neosp1_GeneCatalog_proteins_20170918.aa
Neolan1|1012277	1-309:1587.0	1587	0	309	1	308	0.9968	388081 No KEGG functional class	1	309	jgi|Neolan1|1012277|estExt_Genewise1.C_1390077	1	309	Neocallimastix lanati v1.0	Neolan1_GeneCatalog_proteins_20200610.aa
NeoGfMa1|594001	1-247:1115.0 263-308:68.0	1183	3.23e-148	293	0.9734	230	0.785	388081 No KEGG functional class	1	308	jgi|NeoGfMa1|594001|estExt_fgenesh1_pg.C_1140044	1	301	Neocallimastix sp. Gf-Ma3-1 v1.0	NeoGfMa1_GeneCatalog_proteins_20201119.aa
NeoGfMa1|422224	1-247:1119.0 263-308:69.0	1188	6.7e-149	293	0.9734	230	0.785	388081 No KEGG functional class	1	308	jgi|NeoGfMa1|422224|estExt_Genewise1Plus.C_1140098	1	301	Neocallimastix sp. Gf-Ma3-1 v1.0	NeoGfMa1_GeneCatalog_proteins_20201119.aa
NeoGfMa1|421197	1-309:1498.0	1498	0	309	1	291	0.9417	388081 No KEGG functional class	1	309	jgi|NeoGfMa1|421197|estExt_Genewise1Plus.C_990002	1	309	Neocallimastix sp. Gf-Ma3-1 v1.0	NeoGfMa1_GeneCatalog_proteins_20201119.aa
NeoGfMa1|384867	1-247:1118.0 263-308:68.0	1186	1.26e-148	293	0.9734	230	0.785	388081 No KEGG functional class	1	308	jgi|NeoGfMa1|384867|estExt_Genewise1.C_1140112	1	301	Neocallimastix sp. Gf-Ma3-1 v1.0	NeoGfMa1_GeneCatalog_proteins_20201119.aa
Pirfi3|343522	204-472:1290.0 133-202:271.0 65-100:173.0 30-58:114.0 20-31:46.0 72-100:138.0 21-56:125.0	2157	0	481	0.9544	353	0.7339	391416 No KEGG functional class	20	472	jgi|Pirfi3|343522|estExt_Genewise1Plus.C_4_t10170	22	497	Piromyces finnis v3.0	Pirfi3_GeneCatalog_proteins_20160330.aa
Pirfi3|334117	130-471:1818.0 1-64:262.0 75-101:120.0 61-79:86.0 28-65:133.0	2419	0	490	1.0338	413	0.8429	391416 No KEGG functional class	1	471	jgi|Pirfi3|334117|estExt_Genewise1.C_430328	1	473	Piromyces finnis v3.0	Pirfi3_GeneCatalog_proteins_20160330.aa
PirE2_1|41166	261-472:1122.0 138-236:515.0	1637	0	311	0.9968	286	0.9196	391416 No KEGG functional class	138	472	jgi|PirE2_1|41166|e_gw1.72.8.1	1	312	Piromyces sp. E2 v1.0	PirE2_1_GeneCatalog_proteins_20110421.aa
Orpsp1_1|1181902	130-312:1007.0 317-461:785.0 72-101:151.0	1943	0	358	0.9251	331	0.9246	391416 No KEGG functional class	72	461	jgi|Orpsp1_1|1181902|evm.model.c7180000079077.1	1	387	Orpinomyces sp.	Orpsp1_1_GeneCatalog_proteins_20140826.aa
Orpsp1_1|1180594	130-471:1861.0 1-65:322.0 66-101:185.0 64-100:125.0 12-65:103.0	2596	0	534	1.129	448	0.839	391416 No KEGG functional class	1	471	jgi|Orpsp1_1|1180594|evm.model.c7180000074024.1	1	472	Orpinomyces sp.	Orpsp1_1_GeneCatalog_proteins_20140826.aa
Neosp1|518456	204-472:1270.0 133-202:266.0 72-100:141.0 30-58:117.0 20-31:58.0 30-57:113.0 17-31:55.0 72-100:117.0	2137	0	481	0.9469	351	0.7297	391416 No KEGG functional class	17	472	jgi|Neosp1|518456|fgenesh1_pg.379_#_2	22	501	Neocallimastix californiae G1 v1.0	Neosp1_GeneCatalog_proteins_20170918.aa
Neosp1|460043	130-472:1867.0 1-63:300.0 66-101:187.0 64-100:114.0 18-55:108.0	2576	0	517	1.0816	437	0.8453	391416 No KEGG functional class	1	472	jgi|Neosp1|460043|estExt_Genewise1Plus.C_1600055	1	478	Neocallimastix californiae G1 v1.0	Neosp1_GeneCatalog_proteins_20170918.aa
Neosp1|391416	130-472:1953.0 1-101:589.0 18-65:122.0 63-100:119.0	2783	0	530	1.1229	486	0.917	391416 No KEGG functional class	1	472	jgi|Neosp1|391416|estExt_Genewise1.C_2980043	1	472	Neocallimastix californiae G1 v1.0	Neosp1_GeneCatalog_proteins_20170918.aa
Caecom1|421053	204-472:1284.0 133-202:267.0 72-100:130.0 30-62:108.0 20-32:49.0 72-100:122.0 30-56:103.0	2063	0	470	0.9038	338	0.7191	391416 No KEGG functional class	20	472	jgi|Caecom1|421053|estExt_Genewise1.C_2470015	22	514	Caecomyces churrovis A v1.0	Caecom1_GeneCatalog_proteins_20171213.aa
Anasp1|220853	130-472:1793.0 1-65:299.0 74-101:101.0 32-58:98.0 20-32:60.0 64-100:114.0	2465	0	513	1.0665	416	0.8109	391416 No KEGG functional class	1	472	jgi|Anasp1|220853|estExt_Genewise1.C_1420013	1	475	Anaeromyces robustus v1.0	Anasp1_GeneCatalog_proteins_20160330.aa
Piromy_p0_1|316329	81-263:823.0 265-341:286.0 1-17:54.0	1163	4.42e-138	277	0.761	212	0.7653	392758 No KEGG functional class	1	341	jgi|Piromy_p0_1|316329|estExt_Genewise1.C_chromosome_4_t30236	1	299	Piromyces sp. UH3-1 v2.0	Piromy_p0_1_GeneCatalog_proteins_20200513.aa
Pecora1|5642	107-331:985.0 69-104:131.0	1116	1.85e-138	261	0.2719	203	0.7778	392758 No KEGG functional class	69	331	jgi|Pecora1|5642|allA05704	28	291	Pecoramyces sp. F1	Pecora1_ExternalModels_proteins_2021-11-19.fasta
NeoWI3_1|568453	65-349:1369.0 39-73:96.0 1-21:89.0 43-82:108.0 49-81:105.0	1767	0	414	1.0725	332	0.8019	392758 No KEGG functional class	1	349	jgi|NeoWI3_1|568453|estExt_Genewise1Plus.C_7_t10426	1	362	Neocallimastix sp. WI3-B v1.0	NeoWI3_1_GeneCatalog_proteins_20201119.aa
NeoWI3_1|565957	71-341:1194.0 1-19:69.0	1263	2.82e-157	290	0.9206	234	0.8069	392758 No KEGG functional class	1	341	jgi|NeoWI3_1|565957|estExt_Genewise1Plus.C_5_t20029	1	285	Neocallimastix sp. WI3-B v1.0	NeoWI3_1_GeneCatalog_proteins_20201119.aa
Neosp1|697010	75-341:1190.0 1-17:51.0	1241	1.89e-154	284	0.9016	228	0.8028	392758 No KEGG functional class	1	341	jgi|Neosp1|697010|fgenesh2_kg.3_#_106_#_Locus13081v1rpkm1.62	1	285	Neocallimastix californiae G1 v1.0	Neosp1_GeneCatalog_proteins_20170918.aa
Neosp1|392758	39-349:1657.0 1-21:101.0	1758	0	332	0.8877	332	1	392758 No KEGG functional class	1	349	jgi|Neosp1|392758|estExt_Genewise1.C_4170017	1	349	Neocallimastix californiae G1 v1.0	Neosp1_GeneCatalog_proteins_20170918.aa
Neolan1|1630546	75-341:1190.0 1-17:51.0	1241	2.54e-154	284	0.9016	228	0.8028	392758 No KEGG functional class	1	341	jgi|Neolan1|1630546|fgenesh2_kg.7___1189___TRINITY_DN484_c0_g4_i1	1	285	Neocallimastix lanati v1.0	Neolan1_GeneCatalog_proteins_20200610.aa
Neolan1|1010833	39-349:1657.0 1-21:101.0	1758	0	332	0.8877	332	1	392758 No KEGG functional class	1	349	jgi|Neolan1|1010833|estExt_Genewise1.C_1280074	1	349	Neocallimastix lanati v1.0	Neolan1_GeneCatalog_proteins_20200610.aa
NeoGfMa1|601113	65-349:1369.0 39-73:96.0 1-21:89.0 43-82:108.0 49-81:105.0	1767	0	414	1.0725	332	0.8019	392758 No KEGG functional class	1	349	jgi|NeoGfMa1|601113|estExt_fgenesh1_pm.C_260136	1	362	Neocallimastix sp. Gf-Ma3-1 v1.0	NeoGfMa1_GeneCatalog_proteins_20201119.aa
NeoGfMa1|600465	71-341:1206.0 1-19:67.0	1273	1.24e-158	290	0.9206	236	0.8138	392758 No KEGG functional class	1	341	jgi|NeoGfMa1|600465|estExt_fgenesh1_pm.C_220248	1	285	Neocallimastix sp. Gf-Ma3-1 v1.0	NeoGfMa1_GeneCatalog_proteins_20201119.aa
NeoWI3_1|833686	9-71:226.0 63-102:134.0	360	6.56e-38	103	0.2506	60	0.5825	400191 No KEGG functional class	9	102	jgi|NeoWI3_1|833686|MIX16795_1_12	9	103	Neocallimastix sp. WI3-B v1.0	NeoWI3_1_GeneCatalog_proteins_20201119.aa
NeoWI3_1|605824	8-102:360.0	360	4.58e-43	95	0.5655	56	0.5895	400191 No KEGG functional class	8	102	jgi|NeoWI3_1|605824|fgenesh1_pg.2_#_716	8	102	Neocallimastix sp. WI3-B v1.0	NeoWI3_1_GeneCatalog_proteins_20201119.aa
Neosp1|698746	8-102:377.0	377	1.27e-45	95	0.2241	59	0.6211	400191 No KEGG functional class	8	102	jgi|Neosp1|698746|fgenesh2_kg.21_#_74_#_Locus18326v1rpkm0.66	8	102	Neocallimastix californiae G1 v1.0	Neosp1_GeneCatalog_proteins_20170918.aa
Neosp1|400191	1-102:580.0	580	3.34e-74	102	1	102	1	400191 No KEGG functional class	1	102	jgi|Neosp1|400191|e_gw1.21.136.1	1	102	Neocallimastix californiae G1 v1.0	Neosp1_GeneCatalog_proteins_20170918.aa
Neosp1|400147	8-70:230.0 72-102:145.0	375	1.42e-40	94	0.9126	61	0.6489	400191 No KEGG functional class	8	102	jgi|Neosp1|400147|e_gw1.21.163.1	8	103	Neocallimastix californiae G1 v1.0	Neosp1_GeneCatalog_proteins_20170918.aa
Neolan1|1624882	8-102:377.0	377	1.73e-45	95	0.2241	59	0.6211	400191 No KEGG functional class	8	102	jgi|Neolan1|1624882|fgenesh2_kg.4___465___TRINITY_DN45618_c1_g1_i1	8	102	Neocallimastix lanati v1.0	Neolan1_GeneCatalog_proteins_20200610.aa
Neolan1|1624879	1-102:580.0	580	4.54e-74	102	0.2277	102	1	400191 No KEGG functional class	1	102	jgi|Neolan1|1624879|fgenesh2_kg.4___462___TRINITY_DN2633_c7_g1_i1	1	102	Neocallimastix lanati v1.0	Neolan1_GeneCatalog_proteins_20200610.aa
Neolan1|1301765	8-70:230.0 72-102:145.0	375	4.96e-40	94	0.2156	61	0.6489	400191 No KEGG functional class	8	102	jgi|Neolan1|1301765|estExt_fgenesh1_pg.C_40078	8	103	Neocallimastix lanati v1.0	Neolan1_GeneCatalog_proteins_20200610.aa
NeoGfMa1|631275	9-71:226.0 63-102:134.0	360	6.61e-38	103	0.1823	60	0.5825	400191 No KEGG functional class	9	102	jgi|NeoGfMa1|631275|MIX24890_4_25	9	103	Neocallimastix sp. Gf-Ma3-1 v1.0	NeoGfMa1_GeneCatalog_proteins_20201119.aa
NeoGfMa1|318340	8-102:352.0	352	6.19e-42	95	0.7661	55	0.5789	400191 No KEGG functional class	8	102	jgi|NeoGfMa1|318340|e_gw1.21.774.1	8	102	Neocallimastix sp. Gf-Ma3-1 v1.0	NeoGfMa1_GeneCatalog_proteins_20201119.aa
Pecora1|17298	1-278:1260.0	1260	3.35e-165	278	0.5673	232	0.8345	403614 No KEGG functional class	1	278	jgi|Pecora1|17298|allA18247	1	278	Pecoramyces sp. F1	Pecora1_ExternalModels_proteins_2021-11-19.fasta
NeoWI3_1|498860	1-278:1416.0	1416	0	278	0.9929	263	0.946	403614 No KEGG functional class	1	278	jgi|NeoWI3_1|498860|e_gw1.40.273.1	1	278	Neocallimastix sp. WI3-B v1.0	NeoWI3_1_GeneCatalog_proteins_20201119.aa
NeoWI3_1|480629	1-278:1348.0	1348	4.6e-177	278	0.9055	245	0.8813	403614 No KEGG functional class	1	278	jgi|NeoWI3_1|480629|e_gw1.15.602.1	1	278	Neocallimastix sp. WI3-B v1.0	NeoWI3_1_GeneCatalog_proteins_20201119.aa
Neosp1|403614	1-278:1478.0	1478	0	278	0.9175	278	1	403614 No KEGG functional class	1	278	jgi|Neosp1|403614|e_gw1.36.1.1	1	278	Neocallimastix californiae G1 v1.0	Neosp1_GeneCatalog_proteins_20170918.aa
Neosp1|181162	1-274:1276.0	1276	2.46e-167	274	0.8867	237	0.865	403614 No KEGG functional class	1	274	jgi|Neosp1|181162|CE181161_5940	1	274	Neocallimastix californiae G1 v1.0	Neosp1_GeneCatalog_proteins_20170918.aa
Neolan1|1725571	1-274:1276.0	1276	3.33e-167	274	0.5249	237	0.865	403614 No KEGG functional class	1	274	jgi|Neolan1|1725571|fgenesh2_kg.118___91___TRINITY_DN66_c11_g3_i1	1	274	Neocallimastix lanati v1.0	Neolan1_GeneCatalog_proteins_20200610.aa
Neolan1|959217	1-278:1478.0	1478	0	278	0.936	278	1	403614 No KEGG functional class	1	278	jgi|Neolan1|959217|e_gw1.118.134.1	1	278	Neocallimastix lanati v1.0	Neolan1_GeneCatalog_proteins_20200610.aa
Neolan1|884128	1-278:1328.0	1328	2.37e-174	278	0.936	242	0.8705	403614 No KEGG functional class	1	278	jgi|Neolan1|884128|gw1.64.238.1	1	278	Neocallimastix lanati v1.0	Neolan1_GeneCatalog_proteins_20200610.aa
NeoGfMa1|326119	1-278:1348.0	1348	4.65e-177	278	0.9055	245	0.8813	403614 No KEGG functional class	1	278	jgi|NeoGfMa1|326119|e_gw1.34.139.1	1	278	Neocallimastix sp. Gf-Ma3-1 v1.0	NeoGfMa1_GeneCatalog_proteins_20201119.aa
NeoGfMa1|298110	1-278:1416.0	1416	0	278	0.9929	263	0.946	403614 No KEGG functional class	1	278	jgi|NeoGfMa1|298110|e_gw1.3.644.1	1	278	Neocallimastix sp. Gf-Ma3-1 v1.0	NeoGfMa1_GeneCatalog_proteins_20201119.aa
Piromy_p0_1|298288	253-362:399.0 359-460:398.0 21-75:197.0 162-222:187.0 223-251:131.0 124-145:96.0 107-124:61.0	1469	7.06e-156	397	0.4818	264	0.665	407772 No KEGG functional class	21	460	jgi|Piromy_p0_1|298288|e_gw1.9.2067.1	22	546	Piromyces sp. UH3-1 v2.0	Piromy_p0_1_GeneCatalog_proteins_20200513.aa
Pirfi3|317432	253-362:397.0 359-460:393.0 179-251:230.0 18-96:227.0 93-145:159.0 162-175:47.0	1453	6.13e-159	431	0.5269	261	0.6056	407772 No KEGG functional class	18	460	jgi|Pirfi3|317432|estExt_Genewise1.C_3_t30223	18	549	Piromyces finnis v3.0	Pirfi3_GeneCatalog_proteins_20160330.aa
PirE2_1|3458	104-316:601.0 359-460:383.0 318-361:133.0	1117	7.58e-133	359	0.8253	213	0.5933	407772 No KEGG functional class	104	460	jgi|PirE2_1|3458|gm1.2404_g	69	426	Piromyces sp. E2 v1.0	PirE2_1_GeneCatalog_proteins_20110421.aa
NeoWI3_1|517434	98-460:1608.0 18-75:289.0 80-106:61.0 95-460:1605.0	3563	0	814	0.6061	684	0.8403	407772 No KEGG functional class	18	460	jgi|NeoWI3_1|517434|estExt_Genewise1.C_1_t30425	18	950	Neocallimastix sp. WI3-B v1.0	NeoWI3_1_GeneCatalog_proteins_20201119.aa
Neosp1|673106	307-446:724.0 206-295:403.0 64-105:209.0 161-197:189.0 357-408:267.0 298-345:256.0 201-251:239.0 92-144:213.0	2500	1.15e-179	513	0.9048	482	0.9396	407772 No KEGG functional class	64	446	jgi|Neosp1|673106|estExt_fgenesh1_pg.C_1490062	12	567	Neocallimastix californiae G1 v1.0	Neosp1_GeneCatalog_proteins_20170918.aa
Neosp1|407772	18-460:2172.0	2172	0	443	0.963	418	0.9436	407772 No KEGG functional class	18	460	jgi|Neosp1|407772|e_gw1.57.181.1	18	460	Neocallimastix californiae G1 v1.0	Neosp1_GeneCatalog_proteins_20170918.aa
Neolan1|225291	18-460:2154.0 92-460:1700.0	3854	0	812	0.6795	742	0.9138	407772 No KEGG functional class	18	460	jgi|Neolan1|225291|CE225290_64862	18	892	Neocallimastix lanati v1.0	Neolan1_GeneCatalog_proteins_20200610.aa
NeoGfMa1|530300	98-460:1613.0 18-75:289.0 80-106:61.0 95-460:1613.0	3576	0	814	0.5869	687	0.844	407772 No KEGG functional class	18	460	jgi|NeoGfMa1|530300|gm4.29293_g	18	950	Neocallimastix sp. Gf-Ma3-1 v1.0	NeoGfMa1_GeneCatalog_proteins_20201119.aa
Caecom1|491304	223-365:491.0 359-460:424.0 105-226:279.0 25-58:118.0 55-78:83.0 223-362:475.0 359-460:412.0 94-220:257.0	2539	2.26e-155	794	0.5917	461	0.5806	407772 No KEGG functional class	25	460	jgi|Caecom1|491304|fgenesh1_pg.94_#_34	18	997	Caecomyces churrovis A v1.0	Caecom1_GeneCatalog_proteins_20171213.aa
Anasp1|189848	161-321:533.0 354-460:395.0 320-355:140.0 104-144:125.0	1193	3.63e-138	345	0.9176	221	0.6406	407772 No KEGG functional class	104	460	jgi|Anasp1|189848|gw1.481.3.1	16	376	Anaeromyces robustus v1.0	Anasp1_GeneCatalog_proteins_20160330.aa
Pirfi3|587682	295-479:744.0 179-285:399.0 486-535:201.0 43-111:184.0 114-149:164.0 151-171:81.0	1773	0	468	0.8432	320	0.6838	417089 No KEGG functional class	43	535	jgi|Pirfi3|587682|fgenesh2_kg.76_#_21_#_Locus1352v1rpkm26.17	42	551	Piromyces finnis v3.0	Pirfi3_GeneCatalog_proteins_20160330.aa
Pirfi3|584243	286-535:928.0 179-285:361.0 54-113:165.0 115-149:128.0 151-175:74.0	1656	0	477	0.8472	294	0.6164	417089 No KEGG functional class	54	535	jgi|Pirfi3|584243|fgenesh2_kg.26_#_75_#_Locus5493v1rpkm3.44	52	559	Piromyces finnis v3.0	Pirfi3_GeneCatalog_proteins_20160330.aa
Pirfi3|583722	139-496:1256.0 7-147:384.0 482-535:216.0	1856	0	553	0.9893	343	0.6203	417089 No KEGG functional class	7	535	jgi|Pirfi3|583722|fgenesh2_kg.23_#_44_#_Locus1445v1rpkm23.67	5	555	Piromyces finnis v3.0	Pirfi3_GeneCatalog_proteins_20160330.aa
Pirfi3|410414	151-543:1581.0 50-147:327.0 571-590:72.0	1980	0	511	0.7515	347	0.6791	417089 No KEGG functional class	50	590	jgi|Pirfi3|410414|estExt_fgenesh1_pg.C_90257	47	663	Piromyces finnis v3.0	Pirfi3_GeneCatalog_proteins_20160330.aa
Pirfi3|325635	152-543:1814.0 1-151:591.0 572-590:49.0	2454	0	562	0.8963	437	0.7776	417089 No KEGG functional class	1	590	jgi|Pirfi3|325635|estExt_Genewise1.C_18_t10293	1	610	Piromyces finnis v3.0	Pirfi3_GeneCatalog_proteins_20160330.aa
Orpsp1_1|1181365	152-383:1161.0 7-151:548.0 571-600:65.0 364-543:808.0	2582	0	587	0.9186	468	0.7973	417089 No KEGG functional class	7	600	jgi|Orpsp1_1|1181365|evm.model.c7180000076975.1	6	629	Orpinomyces sp.	Orpsp1_1_GeneCatalog_proteins_20140826.aa
Anasp1|324372	151-478:1399.0 43-151:430.0 479-542:259.0 572-590:65.0 20-30:42.0	2195	0	531	0.8389	388	0.7307	417089 No KEGG functional class	20	590	jgi|Anasp1|324372|fgenesh2_kg.6_#_43_#_Locus994v1rpkm90.22	18	608	Anaeromyces robustus v1.0	Anasp1_GeneCatalog_proteins_20160330.aa
Anasp1|281081	152-543:1872.0 21-151:493.0 573-590:78.0	2443	0	541	0.844	431	0.7967	417089 No KEGG functional class	21	590	jgi|Anasp1|281081|gm1.7347_g	19	618	Anaeromyces robustus v1.0	Anasp1_GeneCatalog_proteins_20160330.aa
Anasp1|266873	290-506:778.0 164-282:422.0 43-113:163.0 115-149:142.0	1505	0	442	0.7282	264	0.5973	417089 No KEGG functional class	43	506	jgi|Anasp1|266873|estExt_fgenesh1_pg.C_700014	43	528	Anaeromyces robustus v1.0	Anasp1_GeneCatalog_proteins_20160330.aa
Anasp1|208105	294-480:712.0 179-285:403.0 43-111:198.0 483-537:198.0 115-151:158.0 152-172:71.0 20-30:41.0	1781	0	487	0.8775	321	0.6591	417089 No KEGG functional class	20	537	jgi|Anasp1|208105|e_gw1.257.14.1	18	553	Anaeromyces robustus v1.0	Anasp1_GeneCatalog_proteins_20160330.aa
Pirfi3|404536	17-179:729.0 378-533:729.0 183-247:297.0 537-601:291.0 380-533:730.0 537-601:298.0 24-179:726.0 183-247:290.0 291-355:297.0 289-355:296.0	4683	0	1021	2.0543	842	0.8247	425520 No KEGG functional class	17	601	jgi|Pirfi3|404536|estExt_fgenesh1_pm.C_220014	12	496	Piromyces finnis v3.0	Pirfi3_GeneCatalog_proteins_20160330.aa
Pirfi3|252512	377-533:731.0 13-179:727.0 183-247:302.0 537-601:302.0 380-533:722.0 537-601:303.0 625-654:106.0 664-688:61.0 614-626:44.0 657-665:42.0 3-179:729.0 183-247:301.0 291-355:285.0 625-652:81.0 613-628:62.0 289-355:290.0	5088	0	1168	1.8423	904	0.774	425520 No KEGG functional class	3	688	jgi|Pirfi3|252512|gw1.1.1814.1	1	634	Piromyces finnis v3.0	Pirfi3_GeneCatalog_proteins_20160330.aa
Pirfi3|62279	17-179:720.0 378-533:719.0 183-249:295.0 537-601:292.0 380-533:717.0 537-603:296.0 613-651:152.0 656-688:109.0 24-179:716.0 183-247:291.0 291-355:287.0 613-651:162.0 501-533:161.0 289-355:289.0 147-179:158.0 657-688:108.0 183-195:60.0	5532	0	1247	1.3569	978	0.7843	425520 No KEGG functional class	17	688	jgi|Pirfi3|62279|CE62278_93685	12	669	Piromyces finnis v3.0	Pirfi3_GeneCatalog_proteins_20160330.aa
Pirfi3|8340	378-533:744.0 21-179:725.0 537-601:296.0 183-247:295.0 380-533:726.0 537-601:296.0 612-651:169.0 656-688:117.0 24-179:741.0 183-247:295.0 291-355:300.0 613-651:157.0 289-355:308.0 656-688:117.0	5286	0	1162	1.0478	930	0.8003	425520 No KEGG functional class	21	688	jgi|Pirfi3|8340|CE8339_978	18	797	Piromyces finnis v3.0	Pirfi3_GeneCatalog_proteins_20160330.aa
Pirfi3|8252	9-179:736.0 378-533:725.0 537-601:302.0 183-250:294.0 380-533:735.0 537-604:295.0 613-651:136.0 657-688:102.0 8-179:729.0 183-247:301.0 291-355:301.0 613-651:155.0 657-688:105.0 289-355:285.0 613-654:163.0	5364	0	1235	1.6533	944	0.7644	425520 No KEGG functional class	8	688	jgi|Pirfi3|8252|CE8251_196070	7	647	Piromyces finnis v3.0	Pirfi3_GeneCatalog_proteins_20160330.aa
Orpsp1_1|1184756	378-533:742.0 9-179:722.0 534-601:284.0 180-247:279.0 380-533:719.0 534-615:285.0 609-651:165.0 660-688:93.0 14-179:739.0 180-247:283.0 291-355:302.0 614-651:153.0 656-688:97.0 289-355:315.0 613-651:141.0 656-688:107.0	5426	0	1280	1.9692	954	0.7453	425520 No KEGG functional class	9	688	jgi|Orpsp1_1|1184756|evm.model.c7180000090878.1	7	649	Orpinomyces sp.	Orpsp1_1_GeneCatalog_proteins_20140826.aa
Orpsp1_1|1179544	378-612:999.0 25-248:986.0 21-249:996.0 379-602:989.0 289-355:275.0 290-355:274.0	4519	0	1045	1.8111	797	0.7627	425520 No KEGG functional class	21	612	jgi|Orpsp1_1|1179544|evm.model.c7180000069816.1	32	516	Orpinomyces sp.	Orpsp1_1_GeneCatalog_proteins_20140826.aa
Anasp1|328525	11-179:704.0 380-533:697.0 182-249:313.0 536-610:313.0 646-666:44.0 379-533:700.0 536-610:313.0 14-179:695.0 182-249:313.0 290-355:270.0 291-355:267.0	4629	0	1082	1.2927	817	0.7551	425520 No KEGG functional class	11	666	jgi|Anasp1|328525|fgenesh2_kg.208_#_1_#_Locus5219v2rpkm0.00_PRE	7	632	Anaeromyces robustus v1.0	Anasp1_GeneCatalog_proteins_20160330.aa
Anasp1|222402	378-533:747.0 11-179:735.0 537-601:304.0 183-247:301.0 380-533:735.0 537-601:302.0 611-651:141.0 656-688:110.0 24-179:744.0 183-247:303.0 291-355:298.0 610-651:152.0 289-355:310.0	5182	0	1143	1.7887	913	0.7988	425520 No KEGG functional class	11	688	jgi|Anasp1|222402|estExt_Genewise1.C_1980013	9	639	Anaeromyces robustus v1.0	Anasp1_GeneCatalog_proteins_20160330.aa
Anasp1|105274	7-179:745.0 378-533:745.0 289-355:312.0 183-247:297.0 537-601:293.0 378-533:748.0 290-355:301.0 537-601:293.0 24-179:745.0 289-355:303.0 183-247:292.0 15-179:744.0 379-533:738.0 537-601:298.0 183-247:292.0 611-651:160.0 652-688:109.0 614-651:155.0 656-688:110.0	7680	0	1700	1.5152	1356	0.7976	425520 No KEGG functional class	7	688	jgi|Anasp1|105274|CE105273_236668	19	875	Anaeromyces robustus v1.0	Anasp1_GeneCatalog_proteins_20160330.aa
Neosp1|706210	16-236:1248.0 1-20:74.0	1322	3.91e-170	241	1.0255	233	0.9668	427438 No KEGG functional class	1	236	jgi|Neosp1|706210|fgenesh2_kg.207_#_3_#_Locus3513v1rpkm19.61	1	235	Neocallimastix californiae G1 v1.0	Neosp1_GeneCatalog_proteins_20170918.aa
Neosp1|706209	16-236:1247.0 1-20:78.0	1325	1.5e-170	241	1.0255	233	0.9668	427438 No KEGG functional class	1	236	jgi|Neosp1|706209|fgenesh2_kg.207_#_2_#_Locus4528v1rpkm13.09	1	235	Neocallimastix californiae G1 v1.0	Neosp1_GeneCatalog_proteins_20170918.aa
Neosp1|427438	1-236:1342.0	1342	1.15e-178	236	1	236	1	427438 No KEGG functional class	1	236	jgi|Neosp1|427438|e_gw1.207.109.1	1	236	Neocallimastix californiae G1 v1.0	Neosp1_GeneCatalog_proteins_20170918.aa
Neosp1|427432	1-236:1337.0	1337	5.68e-178	236	1	235	0.9958	427438 No KEGG functional class	1	236	jgi|Neosp1|427432|e_gw1.207.84.1	1	236	Neocallimastix californiae G1 v1.0	Neosp1_GeneCatalog_proteins_20170918.aa
Neolan1|1431723	1-236:1342.0	1342	1.55e-178	236	1	236	1	427438 No KEGG functional class	1	236	jgi|Neolan1|1431723|estExt_Genemark4.C_1020072	1	236	Neocallimastix lanati v1.0	Neolan1_GeneCatalog_proteins_20200610.aa
Neolan1|1431722	16-236:1245.0 1-20:78.0	1323	3.83e-170	241	1.0255	233	0.9668	427438 No KEGG functional class	1	236	jgi|Neolan1|1431722|estExt_Genemark4.C_1020071	1	235	Neocallimastix lanati v1.0	Neolan1_GeneCatalog_proteins_20200610.aa
Neolan1|1314361	1-236:1332.0	1332	3.8e-177	236	1	234	0.9915	427438 No KEGG functional class	1	236	jgi|Neolan1|1314361|estExt_fgenesh1_pg.C_1020047	1	236	Neocallimastix lanati v1.0	Neolan1_GeneCatalog_proteins_20200610.aa
Neolan1|1314358	1-236:1334.0	1334	2e-177	236	1	234	0.9915	427438 No KEGG functional class	1	236	jgi|Neolan1|1314358|estExt_fgenesh1_pg.C_1020044	1	236	Neocallimastix lanati v1.0	Neolan1_GeneCatalog_proteins_20200610.aa
Neolan1|1006591	16-236:1267.0 1-20:78.0	1345	3.4e-173	241	1.0255	237	0.9834	427438 No KEGG functional class	1	236	jgi|Neolan1|1006591|estExt_Genewise1.C_1020100	1	235	Neocallimastix lanati v1.0	Neolan1_GeneCatalog_proteins_20200610.aa
Neolan1|24345	16-236:1248.0 1-20:74.0	1322	5.27e-170	241	1.0255	233	0.9668	427438 No KEGG functional class	1	236	jgi|Neolan1|24345|CE24344_6393	1	235	Neocallimastix lanati v1.0	Neolan1_GeneCatalog_proteins_20200610.aa
Piromy_p0_1|499031	45-120:226.0 79-119:192.0 66-120:192.0 61-120:178.0 77-120:155.0 85-120:146.0 46-84:44.0 85-120:146.0 80-119:141.0 46-79:42.0	1462	3.29e-23	461	0.8088	239	0.5184	436430 No KEGG functional class	45	120	jgi|Piromy_p0_1|499031|MIX8211_220_100	33	524	Piromyces sp. UH3-1 v2.0	Piromy_p0_1_GeneCatalog_proteins_20200513.aa
Piromy_p0_1|343234	45-120:229.0 1-14:46.0 43-119:224.0 45-119:165.0 84-120:149.0 60-89:48.0 84-119:140.0 45-83:45.0 76-120:141.0	1187	2.04e-24	429	0.9619	202	0.4709	436430 No KEGG functional class	1	120	jgi|Piromy_p0_1|343234|estExt_Genewise1Plus.C_chromosome_3_t10254	1	401	Piromyces sp. UH3-1 v2.0	Piromy_p0_1_GeneCatalog_proteins_20200513.aa
Piromy_p0_1|66989	48-119:225.0 1-13:47.0 53-119:217.0 38-119:200.0 66-120:192.0 61-120:178.0 77-120:155.0 77-120:155.0 84-120:148.0 46-84:43.0 85-120:146.0 80-119:141.0	1847	1.63e-24	589	0.839	306	0.5195	436430 No KEGG functional class	1	120	jgi|Piromy_p0_1|66989|CE66988_381	1	656	Piromyces sp. UH3-1 v2.0	Piromy_p0_1_GeneCatalog_proteins_20200513.aa
Pirfi3|326376	45-119:215.0 82-119:142.0	357	6.47e-22	113	0.1865	54	0.4779	436430 No KEGG functional class	45	119	jgi|Pirfi3|326376|estExt_Genewise1.C_20_t10160	447	568	Piromyces finnis v3.0	Pirfi3_GeneCatalog_proteins_20160330.aa
Pecora1|13040	45-121:219.0 45-119:201.0 45-119:186.0 83-119:145.0 83-119:142.0 85-120:129.0	1022	2.66e-22	337	0.6407	166	0.4926	436430 No KEGG functional class	45	121	jgi|Pecora1|13040|allA13525	27	479	Pecoramyces sp. F1	Pecora1_ExternalModels_proteins_2021-11-19.fasta
NeoWI3_1|149535	73-121:271.0 45-71:91.0 1-14:63.0 41-119:203.0 83-120:152.0 83-120:143.0 85-119:137.0	1060	2.24e-40	280	0.7292	176	0.6286	436430 No KEGG functional class	1	121	jgi|NeoWI3_1|149535|CE149534_722	1	336	Neocallimastix sp. WI3-B v1.0	NeoWI3_1_GeneCatalog_proteins_20201119.aa
Neosp1|700145	41-121:257.0 1-13:57.0 45-119:214.0 46-120:184.0 83-120:146.0 45-84:42.0 83-120:145.0 83-119:138.0	1183	3.95e-30	397	0.7649	197	0.4962	436430 No KEGG functional class	1	121	jgi|Neosp1|700145|fgenesh2_kg.42_#_19_#_Locus2032v1rpkm44.05	1	480	Neocallimastix californiae G1 v1.0	Neosp1_GeneCatalog_proteins_20170918.aa
Neosp1|436430	38-121:450.0 1-14:67.0	517	1.12e-57	98	0.8099	98	1	436430 No KEGG functional class	1	121	jgi|Neosp1|436430|e_gw1.338.72.1	1	121	Neocallimastix californiae G1 v1.0	Neosp1_GeneCatalog_proteins_20170918.aa
Neolan1|1437232	41-121:257.0 1-13:57.0 66-119:211.0 47-120:183.0 83-120:146.0 83-120:145.0 83-119:138.0	1137	5.36e-30	335	0.5574	184	0.5493	436430 No KEGG functional class	1	121	jgi|Neolan1|1437232|estExt_Genemark4.C_2270009	1	487	Neocallimastix lanati v1.0	Neolan1_GeneCatalog_proteins_20200610.aa
Neolan1|1011228	38-121:450.0 1-14:67.0 57-120:203.0 45-65:44.0 61-119:191.0 83-120:147.0 85-119:138.0 45-82:46.0 83-117:135.0	1421	2.46e-57	388	0.8083	245	0.6314	436430 No KEGG functional class	1	121	jgi|Neolan1|1011228|estExt_Genewise1.C_1310057	1	431	Neocallimastix lanati v1.0	Neolan1_GeneCatalog_proteins_20200610.aa
Pirfi3|585603	1-686:2980.0	2980	0	686	0.6806	555	0.809	450186 No KEGG functional class	1	686	jgi|Pirfi3|585603|fgenesh2_kg.39_#_23_#_Locus8612v1rpkm1.05	1	686	Piromyces finnis v3.0	Pirfi3_GeneCatalog_proteins_20160330.aa
Pirfi3|296583	430-566:517.0 283-377:300.0 202-291:284.0 376-426:177.0 571-635:170.0 89-139:107.0 144-186:82.0 656-677:72.0 61-89:62.0 637-647:45.0	1816	0	594	0.9014	326	0.5488	450186 No KEGG functional class	61	677	jgi|Pirfi3|296583|e_gw1.33.619.1	11	627	Piromyces finnis v3.0	Pirfi3_GeneCatalog_proteins_20160330.aa
Pirfi3|280357	426-575:489.0 60-171:301.0 331-426:289.0 190-279:269.0 571-636:157.0 629-684:139.0 279-326:114.0 21-51:55.0	1813	0	649	0.8143	333	0.5131	450186 No KEGG functional class	21	684	jgi|Pirfi3|280357|e_gw1.7.588.1	23	687	Piromyces finnis v3.0	Pirfi3_GeneCatalog_proteins_20160330.aa
PirE2_1|46235	77-679:2681.0	2681	0	603	0.9983	492	0.8159	450186 No KEGG functional class	77	679	jgi|PirE2_1|46235|e_gw1.287.24.1	1	603	Piromyces sp. E2 v1.0	PirE2_1_GeneCatalog_proteins_20110421.aa
PirE2_1|24367	426-566:470.0 60-171:302.0 331-426:291.0 190-279:264.0 571-636:157.0 629-681:122.0 280-326:119.0	1725	0	605	0.9424	318	0.5256	450186 No KEGG functional class	60	681	jgi|PirE2_1|24367|gw1.152.5.1	21	641	Piromyces sp. E2 v1.0	PirE2_1_GeneCatalog_proteins_20110421.aa
PirE2_1|7054	430-563:547.0 205-280:253.0 281-361:253.0 571-635:168.0 385-426:156.0 78-139:134.0 144-201:75.0 656-681:72.0 36-54:51.0 637-651:48.0	1757	0	578	0.6553	316	0.5467	450186 No KEGG functional class	36	681	jgi|PirE2_1|7054|gm1.6000_g	22	664	Piromyces sp. E2 v1.0	PirE2_1_GeneCatalog_proteins_20110421.aa
Orpsp1_1|1180901	430-575:497.0 60-171:298.0 328-426:291.0 190-282:269.0 571-634:166.0 629-684:132.0 21-53:61.0 267-326:125.0	1839	0	663	0.8216	337	0.5083	450186 No KEGG functional class	21	684	jgi|Orpsp1_1|1180901|evm.model.c7180000075072.1	23	689	Orpinomyces sp.	Orpsp1_1_GeneCatalog_proteins_20140826.aa
Anasp1|271403	1-697:2851.0	2851	0	697	0.7407	528	0.7575	450186 No KEGG functional class	1	697	jgi|Anasp1|271403|estExt_fgenesh1_pg.C_3100017	1	697	Anaeromyces robustus v1.0	Anasp1_GeneCatalog_proteins_20160330.aa
Anasp1|210269	430-566:536.0 283-378:317.0 202-278:274.0 380-426:171.0 571-635:171.0 94-147:109.0 144-195:82.0 656-675:74.0 61-86:61.0 637-651:48.0 39-51:43.0	1886	0	602	0.7432	337	0.5598	450186 No KEGG functional class	39	675	jgi|Anasp1|210269|e_gw1.354.6.1	18	655	Anaeromyces robustus v1.0	Anasp1_GeneCatalog_proteins_20160330.aa
Anasp1|205435	430-566:483.0 60-171:299.0 328-426:283.0 190-270:272.0 571-619:145.0 635-681:116.0 271-322:111.0 21-51:58.0	1767	0	608	0.7525	323	0.5312	450186 No KEGG functional class	21	681	jgi|Anasp1|205435|e_gw1.170.5.1	23	687	Anaeromyces robustus v1.0	Anasp1_GeneCatalog_proteins_20160330.aa
Piromy_p0_1|535322	1-236:962.0 291-305:48.0	1010	6.3e-125	251	0.6992	178	0.7092	450319 No KEGG functional class	1	305	jgi|Piromy_p0_1|535322|fgenesh2_kg.chromosome_6___1988___TRINITY_DN8447_c3_g1_i1	1	347	Piromyces sp. UH3-1 v2.0	Piromy_p0_1_GeneCatalog_proteins_20200513.aa
Pirfi3|398422	15-236:909.0 290-306:54.0	963	1.14e-118	239	0.6829	172	0.7197	450319 No KEGG functional class	15	306	jgi|Pirfi3|398422|fgenesh1_pm.30_#_33	1	339	Piromyces finnis v3.0	Pirfi3_GeneCatalog_proteins_20160330.aa
Pecora1|6085	1-237:1060.0	1060	1.99e-138	237	0.4455	193	0.8143	450319 No KEGG functional class	1	237	jgi|Pecora1|6085|allA06110	215	451	Pecoramyces sp. F1	Pecora1_ExternalModels_proteins_2021-11-19.fasta
Orpsp1_1|1177473	1-237:1060.0 288-305:49.0	1109	9.74e-139	255	0.8044	202	0.7922	450319 No KEGG functional class	1	305	jgi|Orpsp1_1|1177473|evm.model.c7180000061569.1	1	305	Orpinomyces sp.	Orpsp1_1_GeneCatalog_proteins_20140826.aa
NeoWI3_1|588088	1-237:1163.0 286-305:90.0	1253	2.86e-158	257	0.7981	233	0.9066	450319 No KEGG functional class	1	305	jgi|NeoWI3_1|588088|estExt_Genewise1Plus.C_33_t10258	1	310	Neocallimastix sp. WI3-B v1.0	NeoWI3_1_GeneCatalog_proteins_20201119.aa
Neosp1|450319	1-237:1256.0 286-306:105.0	1361	2.51e-173	258	0.8139	258	1	450319 No KEGG functional class	1	306	jgi|Neosp1|450319|estExt_Genewise1Plus.C_180119	1	306	Neocallimastix californiae G1 v1.0	Neosp1_GeneCatalog_proteins_20170918.aa
Neolan1|1305577	1-237:1256.0 286-306:105.0	1361	3.37e-173	258	0.8139	258	1	450319 No KEGG functional class	1	306	jgi|Neolan1|1305577|estExt_fgenesh1_pg.C_220138	1	306	Neocallimastix lanati v1.0	Neolan1_GeneCatalog_proteins_20200610.aa
NeoGfMa1|572255	1-237:1167.0 286-305:85.0	1252	4.18e-158	257	0.7649	234	0.9105	450319 No KEGG functional class	1	305	jgi|NeoGfMa1|572255|estExt_Genemark4.C_360015	1	324	Neocallimastix sp. Gf-Ma3-1 v1.0	NeoGfMa1_GeneCatalog_proteins_20201119.aa
Caecom1|397762	1-234:955.0	955	5.75e-124	234	0.6705	173	0.7393	450319 No KEGG functional class	1	234	jgi|Caecom1|397762|e_gw1.9.28.1	1	234	Caecomyces churrovis A v1.0	Caecom1_GeneCatalog_proteins_20171213.aa
Anasp1|215905	1-234:939.0	939	8.21e-122	234	0.6882	165	0.7051	450319 No KEGG functional class	1	234	jgi|Anasp1|215905|estExt_Genewise1.C_160109	1	234	Anaeromyces robustus v1.0	Anasp1_GeneCatalog_proteins_20160330.aa
Pirfi3|356166	63-448:1869.0 19-43:101.0	1970	0	411	0.7473	341	0.8297	450949 No KEGG functional class	19	448	jgi|Pirfi3|356166|estExt_Genewise1Plus.C_33_t10032	19	448	Piromyces finnis v3.0	Pirfi3_GeneCatalog_proteins_20160330.aa
Pirfi3|337443	63-475:1987.0 485-511:97.0 468-486:71.0 28-43:68.0 453-557:445.0 531-557:91.0 521-532:51.0	2810	0	619	1.0975	479	0.7738	450949 No KEGG functional class	28	557	jgi|Pirfi3|337443|estExt_Genewise1.C_640063	27	562	Piromyces finnis v3.0	Pirfi3_GeneCatalog_proteins_20160330.aa
PirE2_1|57501	63-434:1830.0 22-43:78.0	1908	0	394	0.8894	334	0.8477	450949 No KEGG functional class	22	434	jgi|PirE2_1|57501|fgenesh1_pg.13_#_22	24	436	Piromyces sp. E2 v1.0	PirE2_1_GeneCatalog_proteins_20110421.aa
PirE2_1|9765	63-448:1825.0 22-43:91.0	1916	0	408	0.7351	331	0.8113	450949 No KEGG functional class	22	448	jgi|PirE2_1|9765|gm1.8711_g	2	428	Piromyces sp. E2 v1.0	PirE2_1_GeneCatalog_proteins_20110421.aa
Orpsp1_1|1175048	63-475:1936.0 472-558:441.0 19-43:115.0 531-557:97.0 519-532:61.0 485-511:93.0 468-486:56.0	2799	0	612	1.0794	477	0.7794	450949 No KEGG functional class	19	558	jgi|Orpsp1_1|1175048|evm.model.c7180000052428.1	19	566	Orpinomyces sp.	Orpsp1_1_GeneCatalog_proteins_20140826.aa
Neosp1|704281	63-448:1782.0 19-43:96.0	1878	0	411	0.7261	325	0.7908	450949 No KEGG functional class	19	448	jgi|Neosp1|704281|fgenesh2_kg.131_#_33_#_Locus8916v1rpkm3.94	19	448	Neocallimastix californiae G1 v1.0	Neosp1_GeneCatalog_proteins_20170918.aa
Neosp1|450949	63-559:2779.0 19-43:135.0 531-557:91.0 485-511:91.0 519-532:61.0 474-487:61.0	3218	0	604	1.0805	570	0.9437	450949 No KEGG functional class	19	559	jgi|Neosp1|450949|estExt_Genewise1Plus.C_240044	19	559	Neocallimastix californiae G1 v1.0	Neosp1_GeneCatalog_proteins_20170918.aa
Caecom1|453577	79-448:1760.0 19-43:97.0 63-80:94.0	1951	0	413	0.6672	342	0.8281	450949 No KEGG functional class	19	448	jgi|Caecom1|453577|fgenesh1_kg.131_#_10_#_TRINITY_DN8062_c8_g2_i1	19	447	Caecomyces churrovis A v1.0	Caecom1_GeneCatalog_proteins_20171213.aa
Caecom1|415502	63-374:1546.0 467-558:373.0 376-470:364.0 20-43:100.0 531-557:93.0 519-533:51.0	2527	0	565	1	427	0.7558	450949 No KEGG functional class	20	558	jgi|Caecom1|415502|estExt_Genewise1.C_230004	22	564	Caecomyces churrovis A v1.0	Caecom1_GeneCatalog_proteins_20171213.aa
Anasp1|219757	63-448:1964.0 470-557:395.0 19-43:124.0 485-511:101.0 468-486:57.0	2641	0	545	0.9495	447	0.8202	450949 No KEGG functional class	19	557	jgi|Anasp1|219757|estExt_Genewise1.C_1050029	19	572	Anaeromyces robustus v1.0	Anasp1_GeneCatalog_proteins_20160330.aa
Pirfi3|587211	1-545:2057.0	2057	0	545	0.9191	362	0.6642	451319 No KEGG functional class	1	545	jgi|Pirfi3|587211|fgenesh2_kg.65_#_16_#_Locus1513v1rpkm22.28	1	545	Piromyces finnis v3.0	Pirfi3_GeneCatalog_proteins_20160330.aa
Pirfi3|583296	277-574:1156.0 18-275:1100.0	2256	0	556	0.9376	405	0.7284	451319 No KEGG functional class	18	574	jgi|Pirfi3|583296|fgenesh2_kg.20_#_95_#_Locus1664v1rpkm19.86	17	572	Piromyces finnis v3.0	Pirfi3_GeneCatalog_proteins_20160330.aa
Pirfi3|361804	17-548:2043.0	2043	0	532	0.8793	362	0.6805	451319 No KEGG functional class	17	548	jgi|Pirfi3|361804|estExt_Genewise1Plus.C_590045	16	547	Piromyces finnis v3.0	Pirfi3_GeneCatalog_proteins_20160330.aa
Pirfi3|326531	18-549:2304.0	2304	0	532	0.8567	416	0.782	451319 No KEGG functional class	18	549	jgi|Pirfi3|326531|estExt_Genewise1.C_20_t10367	18	549	Piromyces finnis v3.0	Pirfi3_GeneCatalog_proteins_20160330.aa
Orpsp1_1|1178343	277-566:1382.0 17-275:1151.0 568-593:49.0	2582	0	575	0.9696	469	0.8157	451319 No KEGG functional class	17	593	jgi|Orpsp1_1|1178343|evm.model.c7180000064929.1	17	590	Orpinomyces sp.	Orpsp1_1_GeneCatalog_proteins_20140826.aa
Caecom1|495155	17-546:2313.0	2313	0	530	0.866	416	0.7849	451319 No KEGG functional class	17	546	jgi|Caecom1|495155|fgenesh1_pg.227_#_1	17	546	Caecomyces churrovis A v1.0	Caecom1_GeneCatalog_proteins_20171213.aa
Caecom1|264746	17-546:2313.0	2313	0	530	0.866	416	0.7849	451319 No KEGG functional class	17	546	jgi|Caecom1|264746|CE264745_653	17	546	Caecomyces churrovis A v1.0	Caecom1_GeneCatalog_proteins_20171213.aa
Anasp1|298677	1-562:2066.0	2066	0	562	0.9525	370	0.6584	451319 No KEGG functional class	1	562	jgi|Anasp1|298677|estExt_Genemark1.C_8010001	1	562	Anaeromyces robustus v1.0	Anasp1_GeneCatalog_proteins_20160330.aa
Anasp1|268887	18-548:2047.0	2047	0	531	0.885	364	0.6855	451319 No KEGG functional class	18	548	jgi|Anasp1|268887|estExt_fgenesh1_pg.C_1460002	18	548	Anaeromyces robustus v1.0	Anasp1_GeneCatalog_proteins_20160330.aa
Anasp1|267245	1-569:2255.0	2255	0	569	0.9499	407	0.7153	451319 No KEGG functional class	1	569	jgi|Anasp1|267245|estExt_fgenesh1_pg.C_820010	1	569	Anaeromyces robustus v1.0	Anasp1_GeneCatalog_proteins_20160330.aa
Piromy_p0_1|439236	93-311:995.0 319-491:694.0 1-88:348.0 520-555:189.0 489-527:155.0	2381	0	555	0.9771	424	0.764	452532 No KEGG functional class	1	555	jgi|Piromy_p0_1|439236|estExt_fgenesh1_pg.C_chromosome_3_t10382	1	568	Piromyces sp. UH3-1 v2.0	Piromy_p0_1_GeneCatalog_proteins_20200513.aa
Pirfi3|346838	93-316:1014.0 319-527:856.0 1-88:326.0 520-554:177.0	2373	0	556	0.9911	420	0.7554	452532 No KEGG functional class	1	554	jgi|Pirfi3|346838|estExt_Genewise1Plus.C_9_t10014	1	560	Piromyces finnis v3.0	Pirfi3_GeneCatalog_proteins_20160330.aa
Pecora1|2885	1-313:1400.0 478-501:76.0 298-555:1100.0	2576	0	595	1.074	457	0.7681	452532 No KEGG functional class	1	555	jgi|Pecora1|2885|allA02875	1	553	Pecoramyces sp. F1	Pecora1_ExternalModels_proteins_2021-11-19.fasta
NeoWI3_1|920332	1-313:1532.0 319-554:1228.0	2760	0	549	0.9839	507	0.9235	452532 No KEGG functional class	1	554	jgi|NeoWI3_1|920332|fgenesh2_kg.26___195___TRINITY_DN12479_c6_g6_i1	1	557	Neocallimastix sp. WI3-B v1.0	NeoWI3_1_GeneCatalog_proteins_20201119.aa
Neosp1|663240	320-555:1031.0 69-307:970.0 1-63:232.0	2233	0	538	0.9746	394	0.7323	452532 No KEGG functional class	1	555	jgi|Neosp1|663240|estExt_fgenesh1_pg.C_20181	1	552	Neocallimastix californiae G1 v1.0	Neosp1_GeneCatalog_proteins_20170918.aa
Neosp1|452532	1-555:2974.0	2974	0	555	1	555	1	452532 No KEGG functional class	1	555	jgi|Neosp1|452532|estExt_Genewise1Plus.C_400014	1	555	Neocallimastix californiae G1 v1.0	Neosp1_GeneCatalog_proteins_20170918.aa
Neolan1|1300655	320-555:1031.0 69-307:970.0 1-63:232.0	2233	0	538	0.9746	394	0.7323	452532 No KEGG functional class	1	555	jgi|Neolan1|1300655|estExt_fgenesh1_pg.C_10271	1	552	Neocallimastix lanati v1.0	Neolan1_GeneCatalog_proteins_20200610.aa
Neolan1|1042036	1-555:2974.0	2974	0	555	1	555	1	452532 No KEGG functional class	1	555	jgi|Neolan1|1042036|estExt_Genewise1Plus.C_460301	1	555	Neocallimastix lanati v1.0	Neolan1_GeneCatalog_proteins_20200610.aa
Caecom1|524310	83-307:930.0 321-527:767.0 1-91:282.0 520-554:183.0	2162	0	558	1.0182	385	0.69	452532 No KEGG functional class	1	554	jgi|Caecom1|524310|estExt_fgenesh1_pg.C_590055	1	548	Caecomyces churrovis A v1.0	Caecom1_GeneCatalog_proteins_20171213.aa
Anasp1|329637	83-311:1022.0 319-527:826.0 1-90:346.0 520-554:179.0	2373	0	563	0.9895	426	0.7567	452532 No KEGG functional class	1	554	jgi|Anasp1|329637|fgenesh2_kg.334_#_7_#_Locus3423v1rpkm12.18	1	569	Anaeromyces robustus v1.0	Anasp1_GeneCatalog_proteins_20160330.aa
Pecora1|3211	163-323:633.0 1-133:492.0 133-166:142.0	1267	7.26e-157	328	0.948	222	0.6768	453291 No KEGG functional class	1	323	jgi|Pecora1|3211|allA03262	1	322	Pecoramyces sp. F1	Pecora1_ExternalModels_proteins_2021-11-19.fasta
Orpsp1_1|1181983	163-323:633.0 1-133:492.0 133-166:142.0	1267	6.14e-157	328	0.9507	222	0.6768	453291 No KEGG functional class	1	323	jgi|Orpsp1_1|1181983|evm.model.c7180000079406.1	1	322	Orpinomyces sp.	Orpsp1_1_GeneCatalog_proteins_20140826.aa
NeoWI3_1|910620	1-332:1378.0	1378	0	332	0.9568	245	0.738	453291 No KEGG functional class	1	332	jgi|NeoWI3_1|910620|fgenesh2_kg.16___442___TRINITY_DN10536_c0_g2_i2	1	332	Neocallimastix sp. WI3-B v1.0	NeoWI3_1_GeneCatalog_proteins_20201119.aa
NeoWI3_1|557120	1-332:1569.0	1569	0	332	0.9568	284	0.8554	453291 No KEGG functional class	1	332	jgi|NeoWI3_1|557120|estExt_Genewise1.C_760190	1	332	Neocallimastix sp. WI3-B v1.0	NeoWI3_1_GeneCatalog_proteins_20201119.aa
Neosp1|708006	1-332:1362.0	1362	0	332	0.9568	243	0.7319	453291 No KEGG functional class	1	332	jgi|Neosp1|708006|fgenesh2_kg.299_#_15_#_Locus7441v1rpkm5.58	1	332	Neocallimastix californiae G1 v1.0	Neosp1_GeneCatalog_proteins_20170918.aa
Neosp1|453291	1-332:1709.0	1709	0	332	0.9568	319	0.9608	453291 No KEGG functional class	1	332	jgi|Neosp1|453291|estExt_Genewise1Plus.C_490025	1	332	Neocallimastix californiae G1 v1.0	Neosp1_GeneCatalog_proteins_20170918.aa
Neolan1|1623987	1-332:1709.0	1709	0	332	0.9568	319	0.9608	453291 No KEGG functional class	1	332	jgi|Neolan1|1623987|fgenesh2_kg.3___1940___TRINITY_DN11473_c2_g1_i1	1	332	Neocallimastix lanati v1.0	Neolan1_GeneCatalog_proteins_20200610.aa
Neolan1|1424227	1-332:1362.0	1362	1.11e-180	332	0.9568	243	0.7319	453291 No KEGG functional class	1	332	jgi|Neolan1|1424227|estExt_Genemark4.C_360295	1	332	Neocallimastix lanati v1.0	Neolan1_GeneCatalog_proteins_20200610.aa
NeoGfMa1|597944	1-332:1569.0	1569	0	332	0.9568	284	0.8554	453291 No KEGG functional class	1	332	jgi|NeoGfMa1|597944|estExt_fgenesh1_pm.C_90330	1	332	Neocallimastix sp. Gf-Ma3-1 v1.0	NeoGfMa1_GeneCatalog_proteins_20201119.aa
NeoGfMa1|321061	1-332:1379.0	1379	0	332	0.9568	246	0.741	453291 No KEGG functional class	1	332	jgi|NeoGfMa1|321061|e_gw1.25.762.1	1	332	Neocallimastix sp. Gf-Ma3-1 v1.0	NeoGfMa1_GeneCatalog_proteins_20201119.aa
NeoWI3_1|872655	172-303:637.0 73-176:529.0 22-58:213.0	1379	5.35e-171	273	0.901	254	0.9304	454886 No KEGG functional class	22	303	jgi|NeoWI3_1|872655|MIX55764_17_69	22	303	Neocallimastix sp. WI3-B v1.0	NeoWI3_1_GeneCatalog_proteins_20201119.aa
NeoWI3_1|872653	172-303:637.0 73-176:529.0 22-58:213.0	1379	5.35e-171	273	0.901	254	0.9304	454886 No KEGG functional class	22	303	jgi|NeoWI3_1|872653|MIX55762_21_83	22	303	Neocallimastix sp. WI3-B v1.0	NeoWI3_1_GeneCatalog_proteins_20201119.aa
NeoWI3_1|872643	172-303:637.0 73-176:532.0 22-58:213.0	1382	2.07e-171	273	0.901	255	0.9341	454886 No KEGG functional class	22	303	jgi|NeoWI3_1|872643|MIX55752_13_70	22	303	Neocallimastix sp. WI3-B v1.0	NeoWI3_1_GeneCatalog_proteins_20201119.aa
Neosp1|506480	22-303:1412.0	1412	0	282	0.9307	263	0.9326	454886 No KEGG functional class	22	303	jgi|Neosp1|506480|fgenesh1_pg.70_#_16	22	303	Neocallimastix californiae G1 v1.0	Neosp1_GeneCatalog_proteins_20170918.aa
Neosp1|454886	22-303:1432.0	1432	0	282	0.9307	268	0.9504	454886 No KEGG functional class	22	303	jgi|Neosp1|454886|estExt_Genewise1Plus.C_700037	22	303	Neocallimastix californiae G1 v1.0	Neosp1_GeneCatalog_proteins_20170918.aa
Neolan1|1736347	22-303:1432.0	1432	0	282	0.9307	268	0.9504	454886 No KEGG functional class	22	303	jgi|Neolan1|1736347|fgenesh2_kg.145___233___TRINITY_DN6164_c0_g2_i1	22	303	Neocallimastix lanati v1.0	Neolan1_GeneCatalog_proteins_20200610.aa
Neolan1|1736297	22-303:1412.0	1412	0	282	0.9307	263	0.9326	454886 No KEGG functional class	22	303	jgi|Neolan1|1736297|fgenesh2_kg.145___183___TRINITY_DN6164_c0_g2_i1	22	303	Neocallimastix lanati v1.0	Neolan1_GeneCatalog_proteins_20200610.aa
NeoGfMa1|680066	172-303:637.0 73-176:529.0 22-58:213.0	1379	5.41e-171	273	0.901	254	0.9304	454886 No KEGG functional class	22	303	jgi|NeoGfMa1|680066|MIX73681_20_41	22	303	Neocallimastix sp. Gf-Ma3-1 v1.0	NeoGfMa1_GeneCatalog_proteins_20201119.aa
NeoGfMa1|593456	172-303:637.0 73-176:529.0 22-58:213.0	1379	5.41e-171	273	0.901	254	0.9304	454886 No KEGG functional class	22	303	jgi|NeoGfMa1|593456|estExt_fgenesh1_pg.C_960030	22	303	Neocallimastix sp. Gf-Ma3-1 v1.0	NeoGfMa1_GeneCatalog_proteins_20201119.aa
NeoGfMa1|577412	172-303:641.0 73-176:528.0 22-58:213.0	1382	2.1e-171	273	0.901	255	0.9341	454886 No KEGG functional class	22	303	jgi|NeoGfMa1|577412|estExt_Genemark4.C_960055	22	303	Neocallimastix sp. Gf-Ma3-1 v1.0	NeoGfMa1_GeneCatalog_proteins_20201119.aa
Pirfi3|353302	270-549:1278.0 48-100:228.0 18-57:140.0 146-163:46.0	1692	0	391	1.013	297	0.7596	456027 No KEGG functional class	18	549	jgi|Pirfi3|353302|estExt_Genewise1Plus.C_23_t10384	16	385	Piromyces finnis v3.0	Pirfi3_GeneCatalog_proteins_20160330.aa
Pirfi3|338401	249-549:1447.0 122-248:477.0 60-100:204.0 34-50:75.0 20-34:51.0	2254	0	501	0.9244	400	0.7984	456027 No KEGG functional class	20	549	jgi|Pirfi3|338401|estExt_Genewise1.C_750056	20	541	Piromyces finnis v3.0	Pirfi3_GeneCatalog_proteins_20160330.aa
Pirfi3|327921	278-549:1210.0 48-100:221.0 18-57:135.0 146-163:45.0	1611	0	383	1.0052	281	0.7337	456027 No KEGG functional class	18	549	jgi|Pirfi3|327921|estExt_Genewise1.C_23_t10417	16	381	Piromyces finnis v3.0	Pirfi3_GeneCatalog_proteins_20160330.aa
Orpsp1_1|1192701	121-508:1660.0 504-549:243.0 57-100:183.0 1-50:151.0 21-61:116.0	2353	0	569	1.0308	419	0.7364	456027 No KEGG functional class	1	549	jgi|Orpsp1_1|1192701|evm.model.d7180000095272.1	1	549	Orpinomyces sp.	Orpsp1_1_GeneCatalog_proteins_20140826.aa
Orpsp1_1|1174597	247-508:1203.0 122-250:460.0 504-549:242.0	1905	0	437	0.9932	351	0.8032	456027 No KEGG functional class	122	549	jgi|Orpsp1_1|1174597|evm.model.c7180000050695.1	13	440	Orpinomyces sp.	Orpsp1_1_GeneCatalog_proteins_20140826.aa
Anasp1|292095	273-550:1318.0 142-210:268.0 55-99:189.0 121-138:83.0 30-50:80.0 1-34:63.0 216-233:56.0 237-249:42.0 21-58:103.0 252-283:59.0	2261	0	566	1.0071	401	0.7085	456027 No KEGG functional class	1	550	jgi|Anasp1|292095|estExt_Genemark1.C_760026	1	562	Anaeromyces robustus v1.0	Anasp1_GeneCatalog_proteins_20160330.aa
Anasp1|277414	250-550:1376.0 121-247:427.0 56-100:192.0 33-50:75.0 18-34:54.0	2124	0	508	0.9338	372	0.7323	456027 No KEGG functional class	18	550	jgi|Anasp1|277414|gm1.3680_g	17	543	Anaeromyces robustus v1.0	Anasp1_GeneCatalog_proteins_20160330.aa
Anasp1|235246	249-549:1463.0 121-248:470.0 62-108:197.0 18-50:112.0	2242	0	509	0.9322	397	0.78	456027 No KEGG functional class	18	549	jgi|Anasp1|235246|estExt_Genewise1Plus.C_2200008	19	543	Anaeromyces robustus v1.0	Anasp1_GeneCatalog_proteins_20160330.aa
Anasp1|233346	278-549:1229.0 18-51:142.0 48-82:124.0 76-106:99.0	1594	0	372	0.9841	276	0.7419	456027 No KEGG functional class	18	549	jgi|Anasp1|233346|estExt_Genewise1Plus.C_1420020	17	377	Anaeromyces robustus v1.0	Anasp1_GeneCatalog_proteins_20160330.aa
Anasp1|218094	250-549:1469.0 121-211:375.0 55-107:196.0 1-50:134.0 215-247:120.0	2294	0	527	0.9723	405	0.7685	456027 No KEGG functional class	1	549	jgi|Anasp1|218094|estExt_Genewise1.C_580043	1	541	Anaeromyces robustus v1.0	Anasp1_GeneCatalog_proteins_20160330.aa
Pirfi3|349339	126-454:1485.0 1-59:216.0 66-95:141.0 28-53:111.0 18-29:55.0 68-93:104.0 202-226:48.0	2160	0	507	1.1118	358	0.7061	456134 No KEGG functional class	1	454	jgi|Pirfi3|349339|estExt_Genewise1Plus.C_13_t20011	1	455	Piromyces finnis v3.0	Pirfi3_GeneCatalog_proteins_20160330.aa
Pecora1|3273	156-454:1463.0 29-54:118.0 58-80:104.0 128-165:132.0 67-93:113.0	1930	0	413	1.0456	321	0.7772	456134 No KEGG functional class	29	454	jgi|Pecora1|3273|allA03279	4	393	Pecoramyces sp. F1	Pecora1_ExternalModels_proteins_2021-11-19.fasta
Pecora1|2934	123-301:903.0 300-455:774.0 1-54:236.0 54-95:174.0 28-53:105.0 67-93:50.0 68-95:112.0	2354	0	512	1.1204	395	0.7715	456134 No KEGG functional class	1	455	jgi|Pecora1|2934|allA02926	1	456	Pecoramyces sp. F1	Pecora1_ExternalModels_proteins_2021-11-19.fasta
Orpsp1_1|1183643	195-454:1313.0 156-193:144.0 128-165:132.0	1589	0	336	0.9683	267	0.7946	456134 No KEGG functional class	128	454	jgi|Orpsp1_1|1183643|evm.model.c7180000086096.1	21	346	Orpinomyces sp.	Orpsp1_1_GeneCatalog_proteins_20140826.aa
Orpsp1_1|1181857	123-301:903.0 300-455:774.0 1-54:237.0 54-95:174.0 68-95:113.0 28-53:105.0 67-93:50.0	2356	0	512	1.1228	395	0.7715	456134 No KEGG functional class	1	455	jgi|Orpsp1_1|1181857|evm.model.c7180000078893.2	1	456	Orpinomyces sp.	Orpsp1_1_GeneCatalog_proteins_20140826.aa
Orpsp1_1|1179810	195-454:1313.0 156-193:144.0 128-165:132.0	1589	0	336	0.9683	267	0.7946	456134 No KEGG functional class	128	454	jgi|Orpsp1_1|1179810|evm.model.c7180000070825.1	21	346	Orpinomyces sp.	Orpsp1_1_GeneCatalog_proteins_20140826.aa
Neosp1|673436	123-454:1785.0 1-95:449.0 28-53:117.0 69-93:50.0 68-93:117.0	2518	0	504	1.115	429	0.8512	456134 No KEGG functional class	1	454	jgi|Neosp1|673436|estExt_fgenesh1_pg.C_1620006	1	451	Neocallimastix californiae G1 v1.0	Neosp1_GeneCatalog_proteins_20170918.aa
Neosp1|456134	123-455:1913.0 1-96:550.0 28-59:128.0 68-93:127.0	2718	0	487	1.0703	472	0.9692	456134 No KEGG functional class	1	455	jgi|Neosp1|456134|estExt_Genewise1Plus.C_870121	1	455	Neocallimastix californiae G1 v1.0	Neosp1_GeneCatalog_proteins_20170918.aa
Caecom1|417014	239-454:999.0 1-95:384.0 195-237:204.0 144-192:191.0 125-141:45.0 28-53:113.0 68-93:111.0 202-226:44.0	2091	0	497	1.0875	351	0.7062	456134 No KEGG functional class	1	454	jgi|Caecom1|417014|estExt_Genewise1.C_570005	1	456	Caecomyces churrovis A v1.0	Caecom1_GeneCatalog_proteins_20171213.aa
Anasp1|226002	128-454:1475.0 1-55:214.0 66-96:142.0 28-53:106.0 18-28:57.0 69-93:49.0 68-93:104.0 202-226:61.0	2208	0	526	1.1535	372	0.7072	456134 No KEGG functional class	1	454	jgi|Anasp1|226002|estExt_Genewise1.C_4490012	1	455	Anaeromyces robustus v1.0	Anasp1_GeneCatalog_proteins_20160330.aa
Pecora1|9910	199-364:598.0 479-544:249.0 417-484:223.0 631-682:203.0 113-160:197.0 761-795:146.0 720-754:141.0 551-588:137.0 1-35:124.0 588-622:120.0 180-204:78.0 47-62:67.0 93-103:62.0 371-426:192.0 65-109:134.0 761-795:133.0 23-35:74.0 45-62:55.0 74-111:132.0 720-751:125.0 128-155:103.0 47-64:62.0 16-31:44.0 74-125:162.0 127-155:78.0 23-48:65.0 47-64:55.0 761-793:130.0 720-749:96.0 77-110:72.0 129-155:53.0 …	4888	0	1449	1.2699	791	0.5459	456468 No KEGG functional class	1	795	jgi|Pecora1|9910|allA10163	1	1050	Pecoramyces sp. F1	Pecora1_ExternalModels_proteins_2021-11-19.fasta
Pecora1|9909	180-365:635.0 416-540:500.0 551-641:284.0 371-412:189.0 126-171:161.0 720-751:120.0 761-795:120.0 653-679:101.0 2-31:60.0 93-110:59.0 74-106:133.0 720-749:115.0 19-33:53.0 46-63:53.0 761-794:110.0 631-648:85.0 23-34:58.0 74-114:105.0 47-62:56.0 23-33:55.0 127-156:98.0 76-103:48.0 52-62:46.0	3244	0	929	1.1288	538	0.5791	456468 No KEGG functional class	2	795	jgi|Pecora1|9909|allA10162	3	743	Pecoramyces sp. F1	Pecora1_ExternalModels_proteins_2021-11-19.fasta
Pecora1|7958	206-423:815.0 420-549:507.0 551-632:276.0 117-177:235.0 631-686:197.0 181-206:111.0 68-103:105.0 720-750:102.0 1-26:72.0 22-34:72.0 47-64:63.0 720-749:124.0 74-111:117.0 761-793:101.0 129-163:70.0 124-160:125.0 761-794:122.0 723-749:98.0 77-108:97.0 127-155:79.0 761-790:77.0 47-64:72.0 30-42:52.0 711-753:157.0 764-792:83.0 65-103:103.0 128-155:89.0 47-62:50.0 22-34:46.0 755-792:145.0 74-104:101.0…	4516	0	1306	1.6744	743	0.5689	456468 No KEGG functional class	1	794	jgi|Pecora1|7958|allA08130	1	779	Pecoramyces sp. F1	Pecora1_ExternalModels_proteins_2021-11-19.fasta
Orpsp1_1|1177652	206-423:815.0 420-549:507.0 551-632:276.0 117-177:235.0 631-686:197.0 181-206:111.0 68-103:105.0 1-26:72.0 22-34:72.0 47-64:63.0 720-749:124.0 74-111:117.0 761-790:77.0 129-163:70.0 124-160:125.0 761-794:122.0 723-749:98.0 77-108:97.0 127-155:79.0 720-749:76.0 47-64:72.0 30-42:52.0 711-753:157.0 764-792:83.0 755-792:145.0 65-103:103.0 47-62:50.0 22-34:46.0	4146	0	1197	1.633	686	0.5731	456468 No KEGG functional class	1	794	jgi|Orpsp1_1|1177652|evm.model.c7180000062316.1	1	721	Orpinomyces sp.	Orpsp1_1_GeneCatalog_proteins_20140826.aa
Orpsp1_1|1177530	205-446:844.0 551-641:300.0 65-109:150.0 116-155:137.0 761-790:127.0 23-46:116.0 178-200:102.0 52-63:61.0 159-174:58.0 416-549:509.0 631-681:198.0 48-110:163.0 720-749:117.0 122-165:65.0 109-155:129.0 721-753:123.0 761-792:116.0 74-103:92.0 720-753:129.0 762-790:114.0 127-166:85.0 95-109:58.0 74-121:124.0 127-156:107.0 47-62:54.0 761-795:119.0 720-749:108.0 720-753:123.0 22-34:53.0 74-103:101.0 5…	4776	0	1403	1.7604	791	0.5638	456468 No KEGG functional class	22	795	jgi|Orpsp1_1|1177530|evm.model.c7180000061824.1	2	796	Orpinomyces sp.	Orpsp1_1_GeneCatalog_proteins_20140826.aa
Neosp1|702584	200-364:619.0 551-641:270.0 478-549:267.0 420-485:239.0 368-422:217.0 74-108:113.0 775-795:101.0 47-73:82.0 19-46:74.0 181-204:68.0 630-686:230.0 74-105:116.0 127-162:95.0 733-749:93.0 720-749:119.0 761-790:107.0 720-749:108.0 127-155:101.0 70-109:123.0 47-73:66.0 22-33:59.0 761-792:128.0	3395	0	956	1.2163	558	0.5837	456468 No KEGG functional class	19	795	jgi|Neosp1|702584|fgenesh2_kg.91_#_18_#_Locus5790v1rpkm8.72	17	690	Neocallimastix californiae G1 v1.0	Neosp1_GeneCatalog_proteins_20170918.aa
Neosp1|702582	204-375:573.0 423-549:473.0 631-682:216.0 551-592:139.0 113-160:138.0 720-752:133.0 761-793:119.0 74-103:107.0 19-34:94.0 180-200:73.0 371-440:216.0 591-641:144.0 720-770:135.0 65-103:102.0 23-34:72.0 47-62:53.0 320-366:44.0 720-758:139.0 761-790:113.0 127-155:74.0 761-790:111.0 720-754:101.0 70-108:123.0 23-33:61.0 38-62:55.0 70-105:105.0 127-155:79.0 127-155:92.0 762-790:69.0 74-103:66.0	4019	0	1251	1.3365	654	0.5228	456468 No KEGG functional class	19	793	jgi|Neosp1|702582|fgenesh2_kg.91_#_16_#_Locus2990v1rpkm25.16	17	872	Neocallimastix californiae G1 v1.0	Neosp1_GeneCatalog_proteins_20170918.aa
Neosp1|456468	1-686:3777.0 711-795:521.0 834-865:156.0 755-790:208.0 714-749:208.0 116-164:112.0 64-112:112.0 718-749:91.0 124-155:91.0 93-105:53.0 52-64:53.0 720-751:140.0 74-105:140.0 759-790:93.0 124-155:93.0 139-156:60.0 46-63:60.0 47-114:175.0 734-794:169.0	6312	0	1356	1.5676	1097	0.809	456468 No KEGG functional class	1	865	jgi|Neosp1|456468|estExt_Genewise1Plus.C_910033	1	865	Neocallimastix californiae G1 v1.0	Neosp1_GeneCatalog_proteins_20170918.aa
Neosp1|456457	209-365:602.0 482-544:265.0 428-487:225.0 627-681:208.0 368-416:206.0 713-751:168.0 753-792:165.0 584-622:134.0 128-171:118.0 1-34:72.0 77-103:72.0 180-202:57.0 714-751:171.0 74-114:128.0 124-155:89.0 22-41:66.0 39-77:52.0 714-751:168.0 551-597:122.0 140-162:69.0 191-212:65.0 754-790:161.0 124-155:86.0 22-33:64.0 93-108:51.0 74-107:128.0 124-155:93.0 47-62:58.0 753-790:151.0 723-749:78.0 74-105:1…	4278	0	1217	1.4335	702	0.5768	456468 No KEGG functional class	1	792	jgi|Neosp1|456457|estExt_Genewise1Plus.C_910022	1	848	Neocallimastix californiae G1 v1.0	Neosp1_GeneCatalog_proteins_20170918.aa
Neosp1|383375	180-416:865.0 479-549:260.0 428-487:234.0 631-686:229.0 714-750:185.0 128-171:146.0 551-583:130.0 775-795:75.0 761-778:58.0 754-790:175.0 591-641:135.0 1-43:103.0 51-63:53.0 456-476:45.0 74-109:138.0 734-749:64.0 720-737:60.0 20-34:57.0 17-37:72.0 74-92:62.0 93-114:60.0	3206	0	889	1.1744	530	0.5962	456468 No KEGG functional class	1	795	jgi|Neosp1|383375|estExt_Genewise1.C_910023	1	689	Neocallimastix californiae G1 v1.0	Neosp1_GeneCatalog_proteins_20170918.aa
Pirfi3|280357	286-689:1554.0 1-286:1115.0 716-785:230.0 797-854:149.0	3048	0	818	1.0263	539	0.6589	457029 No KEGG functional class	1	854	jgi|Pirfi3|280357|e_gw1.7.588.1	1	794	Piromyces finnis v3.0	Pirfi3_GeneCatalog_proteins_20160330.aa
PirE2_1|24367	286-687:1486.0 44-286:982.0	2468	0	645	1.0047	443	0.6868	457029 No KEGG functional class	44	687	jgi|PirE2_1|24367|gw1.152.5.1	1	642	Piromyces sp. E2 v1.0	PirE2_1_GeneCatalog_proteins_20110421.aa
Orpsp1_1|1180901	1-689:2820.0 707-785:311.0 797-854:134.0	3265	0	826	1.0235	582	0.7046	457029 No KEGG functional class	1	854	jgi|Orpsp1_1|1180901|evm.model.c7180000075072.1	1	804	Orpinomyces sp.	Orpsp1_1_GeneCatalog_proteins_20140826.aa
Neosp1|668659	64-286:518.0 432-577:416.0 338-433:284.0 573-635:167.0 290-339:130.0 640-689:130.0 5-55:74.0	1719	0	679	0.7317	319	0.4698	457029 No KEGG functional class	5	689	jgi|Neosp1|668659|estExt_fgenesh1_pg.C_610041	3	684	Neocallimastix californiae G1 v1.0	Neosp1_GeneCatalog_proteins_20170918.aa
Neosp1|457029	1-855:4435.0 785-854:138.0 715-784:138.0	4711	0	995	1.1637	872	0.8764	457029 No KEGG functional class	1	855	jgi|Neosp1|457029|estExt_Genewise1Plus.C_990117	1	855	Neocallimastix californiae G1 v1.0	Neosp1_GeneCatalog_proteins_20170918.aa
Neosp1|450186	64-286:516.0 432-577:420.0 338-433:258.0 574-637:161.0 291-336:120.0 634-689:119.0 5-55:83.0	1677	0	682	0.9045	313	0.4589	457029 No KEGG functional class	5	689	jgi|Neosp1|450186|estExt_Genewise1Plus.C_170175	3	684	Neocallimastix californiae G1 v1.0	Neosp1_GeneCatalog_proteins_20170918.aa
Neosp1|394421	286-674:1586.0 1-287:1220.0 709-785:269.0 675-689:58.0 796-854:143.0	3276	0	827	1.0235	587	0.7098	457029 No KEGG functional class	1	854	jgi|Neosp1|394421|e_gw1.1.198.1	1	805	Neocallimastix californiae G1 v1.0	Neosp1_GeneCatalog_proteins_20170918.aa
Caecom1|437022	370-689:1154.0 1-282:1021.0 286-368:289.0 718-785:235.0 795-854:148.0	2847	0	813	1	502	0.6175	457029 No KEGG functional class	1	854	jgi|Caecom1|437022|estExt_Genewise1Plus.C_4670003	1	810	Caecomyces churrovis A v1.0	Caecom1_GeneCatalog_proteins_20171213.aa
Anasp1|271403	432-577:410.0 338-433:294.0 192-286:268.0 64-175:265.0 573-635:162.0 291-336:124.0 641-689:119.0 5-55:81.0	1723	0	658	0.6993	319	0.4848	457029 No KEGG functional class	5	689	jgi|Anasp1|271403|estExt_fgenesh1_pg.C_3100017	3	684	Anaeromyces robustus v1.0	Anasp1_GeneCatalog_proteins_20160330.aa
Anasp1|205435	1-641:2496.0 709-785:235.0 679-689:46.0 632-676:162.0 797-854:142.0	3081	0	832	1.0297	546	0.6562	457029 No KEGG functional class	1	854	jgi|Anasp1|205435|e_gw1.170.5.1	1	805	Anaeromyces robustus v1.0	Anasp1_GeneCatalog_proteins_20160330.aa
Piromy_p0_1|530194	21-192:761.0 194-332:546.0 352-449:331.0	1638	0	409	0.8777	288	0.7042	457800 No KEGG functional class	21	449	jgi|Piromy_p0_1|530194|fgenesh2_kg.chromosome_4___3688___TRINITY_DN6705_c0_g2_i2	19	445	Piromyces sp. UH3-1 v2.0	Piromy_p0_1_GeneCatalog_proteins_20200513.aa
Pirfi3|586224	1-192:788.0 226-332:461.0 352-452:339.0 194-228:122.0	1710	0	435	0.9395	301	0.692	457800 No KEGG functional class	1	452	jgi|Pirfi3|586224|fgenesh2_kg.46_#_59_#_Locus8331v1rpkm1.19	1	449	Piromyces finnis v3.0	Pirfi3_GeneCatalog_proteins_20160330.aa
PirE2_1|59468	1-192:779.0 226-332:463.0 352-447:342.0 194-228:124.0	1708	0	430	0.9149	297	0.6907	457800 No KEGG functional class	1	447	jgi|PirE2_1|59468|fgenesh1_pg.66_#_15	1	444	Piromyces sp. E2 v1.0	PirE2_1_GeneCatalog_proteins_20110421.aa
Pecora1|13335	1-192:880.0 194-330:690.0 352-447:378.0	1948	0	425	0.9101	353	0.8306	457800 No KEGG functional class	1	447	jgi|Pecora1|13335|allA15229	1	446	Pecoramyces sp. F1	Pecora1_ExternalModels_proteins_2021-11-19.fasta
Neosp1|670018	1-333:1610.0 352-435:392.0 435-462:62.0	2064	0	445	0.9408	376	0.8449	457800 No KEGG functional class	1	462	jgi|Neosp1|670018|estExt_fgenesh1_pg.C_850034	1	473	Neocallimastix californiae G1 v1.0	Neosp1_GeneCatalog_proteins_20170918.aa
Neosp1|457800	1-333:1798.0 352-462:597.0	2395	0	444	0.961	444	1	457800 No KEGG functional class	1	462	jgi|Neosp1|457800|estExt_Genewise1Plus.C_1100087	1	462	Neocallimastix californiae G1 v1.0	Neosp1_GeneCatalog_proteins_20170918.aa
Neolan1|1738840	1-333:1798.0 352-462:597.0	2395	0	444	0.961	444	1	457800 No KEGG functional class	1	462	jgi|Neolan1|1738840|fgenesh2_kg.152___442___TRINITY_DN2663_c8_g1_i1	1	462	Neocallimastix lanati v1.0	Neolan1_GeneCatalog_proteins_20200610.aa
Neolan1|1665048	1-333:1610.0 352-435:392.0 435-462:57.0	2059	0	445	0.9408	375	0.8427	457800 No KEGG functional class	1	462	jgi|Neolan1|1665048|fgenesh2_kg.32___1231___TRINITY_DN1620_c1_g1_i1	1	473	Neocallimastix lanati v1.0	Neolan1_GeneCatalog_proteins_20200610.aa
Caecom1|435792	2-190:780.0 228-333:460.0 352-435:294.0 194-228:117.0 436-457:43.0	1694	0	436	0.9437	304	0.6972	457800 No KEGG functional class	2	457	jgi|Caecom1|435792|estExt_Genewise1Plus.C_3020003	1	455	Caecomyces churrovis A v1.0	Caecom1_GeneCatalog_proteins_20171213.aa
Anasp1|290848	1-192:800.0 238-333:436.0 352-428:355.0 194-233:126.0	1717	0	405	0.871	304	0.7506	457800 No KEGG functional class	1	428	jgi|Anasp1|290848|estExt_Genemark1.C_390018	1	424	Anaeromyces robustus v1.0	Anasp1_GeneCatalog_proteins_20160330.aa
Pirfi3|343522	210-478:1289.0 139-208:262.0 57-104:169.0 30-57:119.0 20-55:126.0 76-104:120.0	2085	0	480	0.9524	345	0.7188	460043 No KEGG functional class	20	478	jgi|Pirfi3|343522|estExt_Genewise1Plus.C_4_t10170	30	497	Piromyces finnis v3.0	Pirfi3_GeneCatalog_proteins_20160330.aa
Pirfi3|334117	136-477:1835.0 1-85:364.0 79-105:96.0 28-55:127.0	2422	0	482	1.0169	412	0.8548	460043 No KEGG functional class	1	477	jgi|Pirfi3|334117|estExt_Genewise1.C_430328	1	473	Piromyces finnis v3.0	Pirfi3_GeneCatalog_proteins_20160330.aa
PirE2_1|41166	267-478:1119.0 144-242:545.0	1664	0	311	0.9968	290	0.9325	460043 No KEGG functional class	144	478	jgi|PirE2_1|41166|e_gw1.72.8.1	1	312	Piromyces sp. E2 v1.0	PirE2_1_GeneCatalog_proteins_20110421.aa
Orpsp1_1|1181902	135-318:1021.0 323-467:777.0 76-105:164.0	1962	0	359	0.9276	333	0.9276	460043 No KEGG functional class	76	467	jgi|Orpsp1_1|1181902|evm.model.c7180000079077.1	1	387	Orpinomyces sp.	Orpsp1_1_GeneCatalog_proteins_20140826.aa
Orpsp1_1|1180594	135-477:1875.0 1-63:322.0 66-105:203.0 68-104:103.0 9-55:102.0	2605	0	530	1.1205	448	0.8453	460043 No KEGG functional class	1	477	jgi|Orpsp1_1|1180594|evm.model.c7180000074024.1	1	472	Orpinomyces sp.	Orpsp1_1_GeneCatalog_proteins_20140826.aa
Neosp1|518456	210-478:1269.0 139-208:262.0 30-104:228.0 21-31:55.0 30-57:107.0 21-31:49.0 76-104:118.0	2088	0	493	0.9705	349	0.7079	460043 No KEGG functional class	21	478	jgi|Neosp1|518456|fgenesh1_pg.379_#_2	23	501	Neocallimastix californiae G1 v1.0	Neosp1_GeneCatalog_proteins_20170918.aa
Neosp1|460043	134-478:1961.0 1-105:611.0	2572	0	450	0.9414	450	1	460043 No KEGG functional class	1	478	jgi|Neosp1|460043|estExt_Genewise1Plus.C_1600055	1	478	Neocallimastix californiae G1 v1.0	Neosp1_GeneCatalog_proteins_20170918.aa
Neosp1|391416	134-478:1877.0 1-63:300.0 70-105:187.0 19-87:117.0 67-104:108.0	2589	0	551	1.1674	443	0.804	460043 No KEGG functional class	1	478	jgi|Neosp1|391416|estExt_Genewise1.C_2980043	1	472	Neocallimastix californiae G1 v1.0	Neosp1_GeneCatalog_proteins_20170918.aa
Caecom1|421053	210-478:1287.0 139-208:271.0 76-104:131.0 30-67:111.0 21-32:50.0 76-104:122.0 30-55:103.0	2075	0	473	0.9096	343	0.7252	460043 No KEGG functional class	21	478	jgi|Caecom1|421053|estExt_Genewise1.C_2470015	23	514	Caecomyces churrovis A v1.0	Caecom1_GeneCatalog_proteins_20171213.aa
Anasp1|220853	134-478:1840.0 1-62:286.0 78-105:98.0 36-55:89.0 21-31:57.0	2370	0	466	0.9688	399	0.8562	460043 No KEGG functional class	1	478	jgi|Anasp1|220853|estExt_Genewise1.C_1420013	1	475	Anaeromyces robustus v1.0	Anasp1_GeneCatalog_proteins_20160330.aa
Pirfi3|581176	126-507:1692.0 1-62:226.0 61-98:192.0 63-102:175.0 22-57:163.0	2448	0	558	1.0941	429	0.7688	460692 No KEGG functional class	1	507	jgi|Pirfi3|581176|fgenesh2_kg.8_#_172_#_Locus992v1rpkm39.29	1	510	Piromyces finnis v3.0	Pirfi3_GeneCatalog_proteins_20160330.aa
Pecora1|17092	330-507:790.0 127-329:747.0	1537	0	381	0.9248	284	0.7454	460692 No KEGG functional class	127	507	jgi|Pecora1|17092|allA17893	30	411	Pecoramyces sp. F1	Pecora1_ExternalModels_proteins_2021-11-19.fasta
Orpsp1_1|1186363	124-489:1440.0	1440	0	366	0.9127	269	0.735	460692 No KEGG functional class	124	489	jgi|Orpsp1_1|1186363|evm.model.d7180000049997.1	36	401	Orpinomyces sp.	Orpsp1_1_GeneCatalog_proteins_20140826.aa
Orpsp1_1|1180621	124-505:1490.0	1490	0	382	0.9161	280	0.733	460692 No KEGG functional class	124	505	jgi|Orpsp1_1|1180621|evm.model.c7180000074131.1	36	417	Orpinomyces sp.	Orpsp1_1_GeneCatalog_proteins_20140826.aa
Neosp1|708408	123-507:1815.0 1-58:245.0 61-98:185.0 63-98:186.0 22-57:170.0	2601	0	553	1.095	455	0.8228	460692 No KEGG functional class	1	507	jgi|Neosp1|708408|fgenesh2_kg.332_#_4_#_Locus1347v1rpkm80.57	1	504	Neocallimastix californiae G1 v1.0	Neosp1_GeneCatalog_proteins_20170918.aa
Neosp1|705926	124-331:845.0 329-506:744.0 1-62:243.0 60-102:214.0 62-102:196.0 22-61:183.0	2425	0	572	1.126	422	0.7378	460692 No KEGG functional class	1	506	jgi|Neosp1|705926|fgenesh2_kg.194_#_10_#_Locus1411v1rpkm75.35	1	507	Neocallimastix californiae G1 v1.0	Neosp1_GeneCatalog_proteins_20170918.aa
Neosp1|664085	132-331:782.0 329-507:767.0 1-62:208.0 63-90:115.0 62-100:176.0	2048	0	508	1.0855	359	0.7067	460692 No KEGG functional class	1	507	jgi|Neosp1|664085|estExt_fgenesh1_pg.C_90067	1	468	Neocallimastix californiae G1 v1.0	Neosp1_GeneCatalog_proteins_20170918.aa
Neosp1|460692	123-507:1986.0 1-102:592.0 63-102:178.0 22-61:178.0	2934	0	567	1.1183	529	0.933	460692 No KEGG functional class	1	507	jgi|Neosp1|460692|estExt_Genewise1Plus.C_1790029	1	507	Neocallimastix californiae G1 v1.0	Neosp1_GeneCatalog_proteins_20170918.aa
Neosp1|449056	124-331:821.0 324-507:761.0 1-62:199.0 63-102:186.0 62-100:182.0 20-62:169.0	2318	0	576	1.0971	402	0.6979	460692 No KEGG functional class	1	507	jgi|Neosp1|449056|estExt_Genewise1Plus.C_90120	1	525	Neocallimastix californiae G1 v1.0	Neosp1_GeneCatalog_proteins_20170918.aa
Anasp1|219082	123-507:1783.0 1-59:253.0 61-102:184.0 20-61:194.0 63-100:169.0	2583	0	566	1.1098	454	0.8021	460692 No KEGG functional class	1	507	jgi|Anasp1|219082|estExt_Genewise1.C_860001	1	510	Anaeromyces robustus v1.0	Anasp1_GeneCatalog_proteins_20160330.aa
Pirfi3|585177	317-615:1461.0 129-299:779.0 11-126:424.0 61-109:171.0 21-76:171.0	3006	0	691	1.1498	518	0.7496	462091 No KEGG functional class	11	615	jgi|Pirfi3|585177|fgenesh2_kg.35_#_8_#_Locus1663v1rpkm19.87	3	601	Piromyces finnis v3.0	Pirfi3_GeneCatalog_proteins_20160330.aa
PirE2_1|60141	317-614:1282.0 151-299:662.0	1944	0	447	0.845	337	0.7539	462091 No KEGG functional class	151	614	jgi|PirE2_1|60141|fgenesh1_pg.91_#_19	64	527	Piromyces sp. E2 v1.0	PirE2_1_GeneCatalog_proteins_20110421.aa
PirE2_1|13865	317-615:1494.0 136-299:790.0 1-126:486.0 50-110:172.0 21-64:163.0	3105	0	694	1.1377	539	0.7767	462091 No KEGG functional class	1	615	jgi|PirE2_1|13865|gm1.12811_g	1	610	Piromyces sp. E2 v1.0	PirE2_1_GeneCatalog_proteins_20110421.aa
PirE2_1|7747	317-614:1290.0 149-299:657.0	1947	0	449	0.9258	341	0.7595	462091 No KEGG functional class	149	614	jgi|PirE2_1|7747|gm1.6693_g	19	484	Piromyces sp. E2 v1.0	PirE2_1_GeneCatalog_proteins_20110421.aa
Orpsp1_1|1187390	317-614:1325.0 151-299:629.0	1954	0	447	0.7828	344	0.7696	462091 No KEGG functional class	151	614	jgi|Orpsp1_1|1187390|evm.model.d7180000057354.2	106	569	Orpinomyces sp.	Orpsp1_1_GeneCatalog_proteins_20140826.aa
Orpsp1_1|1180013	317-615:1421.0 240-299:268.0	1689	0	359	0.9548	301	0.8384	462091 No KEGG functional class	240	615	jgi|Orpsp1_1|1180013|evm.model.c7180000071787.2	1	376	Orpinomyces sp.	Orpsp1_1_GeneCatalog_proteins_20140826.aa
Neosp1|675080	317-614:1295.0 179-299:470.0	1765	0	419	0.9588	308	0.7351	462091 No KEGG functional class	179	614	jgi|Neosp1|675080|estExt_fgenesh1_pg.C_2190005	1	436	Neocallimastix californiae G1 v1.0	Neosp1_GeneCatalog_proteins_20170918.aa
Neosp1|664568	317-614:1292.0 152-299:609.0	1901	0	446	0.9139	332	0.7444	462091 No KEGG functional class	152	614	jgi|Neosp1|664568|estExt_fgenesh1_pg.C_130060	25	487	Neocallimastix californiae G1 v1.0	Neosp1_GeneCatalog_proteins_20170918.aa
Caecom1|443826	358-615:1238.0 129-299:731.0 1-125:446.0 317-375:219.0 50-109:166.0 21-62:153.0	2953	0	715	1.1645	517	0.7231	462091 No KEGG functional class	1	615	jgi|Caecom1|443826|fgenesh1_kg.9_#_137_#_TRINITY_DN8169_c7_g1_i1	1	614	Caecomyces churrovis A v1.0	Caecom1_GeneCatalog_proteins_20171213.aa
Anasp1|247635	317-615:1430.0 127-299:817.0 1-21:78.0	2325	0	493	0.9648	412	0.8357	462091 No KEGG functional class	1	615	jgi|Anasp1|247635|fgenesh1_pg.233_#_15	1	511	Anaeromyces robustus v1.0	Anasp1_GeneCatalog_proteins_20160330.aa
NeoWI3_1|578761	1-266:1192.0 282-305:94.0	1286	8.42e-163	290	0.9635	241	0.831	464995 No KEGG functional class	1	305	jgi|NeoWI3_1|578761|estExt_Genewise1Plus.C_18_t10014	1	300	Neocallimastix sp. WI3-B v1.0	NeoWI3_1_GeneCatalog_proteins_20201119.aa
NeoWI3_1|539495	1-251:1194.0 255-307:200.0	1394	1.31e-177	304	1	268	0.8816	464995 No KEGG functional class	1	307	jgi|NeoWI3_1|539495|estExt_Genewise1.C_25_t10228	1	304	Neocallimastix sp. WI3-B v1.0	NeoWI3_1_GeneCatalog_proteins_20201119.aa
NeoWI3_1|534691	1-266:1198.0 282-305:98.0	1296	3.59e-164	290	0.9635	242	0.8345	464995 No KEGG functional class	1	305	jgi|NeoWI3_1|534691|estExt_Genewise1.C_18_t10019	1	300	Neocallimastix sp. WI3-B v1.0	NeoWI3_1_GeneCatalog_proteins_20201119.aa
Neosp1|464995	1-307:1578.0	1578	0	307	1	307	1	464995 No KEGG functional class	1	307	jgi|Neosp1|464995|estExt_Genewise1Plus.C_3740001	1	307	Neocallimastix californiae G1 v1.0	Neosp1_GeneCatalog_proteins_20170918.aa
Neosp1|378816	1-265:1195.0 271-307:116.0	1311	2.14e-166	302	0.9869	250	0.8278	464995 No KEGG functional class	1	307	jgi|Neosp1|378816|estExt_Genewise1.C_340201	1	306	Neocallimastix californiae G1 v1.0	Neosp1_GeneCatalog_proteins_20170918.aa
Neolan1|988851	1-307:1578.0	1578	0	307	1	307	1	464995 No KEGG functional class	1	307	jgi|Neolan1|988851|estExt_Genewise1.C_32_t10245	1	307	Neocallimastix lanati v1.0	Neolan1_GeneCatalog_proteins_20200610.aa
NeoGfMa1|594003	1-266:1188.0 282-305:99.0	1287	6.21e-163	290	0.9635	241	0.831	464995 No KEGG functional class	1	305	jgi|NeoGfMa1|594003|estExt_fgenesh1_pg.C_1140046	1	300	Neocallimastix sp. Gf-Ma3-1 v1.0	NeoGfMa1_GeneCatalog_proteins_20201119.aa
NeoGfMa1|422224	1-266:1198.0 282-305:98.0	1296	3.63e-164	290	0.9635	242	0.8345	464995 No KEGG functional class	1	305	jgi|NeoGfMa1|422224|estExt_Genewise1Plus.C_1140098	1	300	Neocallimastix sp. Gf-Ma3-1 v1.0	NeoGfMa1_GeneCatalog_proteins_20201119.aa
NeoGfMa1|384867	1-266:1189.0 282-305:99.0	1288	4.53e-163	290	0.9635	242	0.8345	464995 No KEGG functional class	1	305	jgi|NeoGfMa1|384867|estExt_Genewise1.C_1140112	1	300	Neocallimastix sp. Gf-Ma3-1 v1.0	NeoGfMa1_GeneCatalog_proteins_20201119.aa
NeoGfMa1|369392	1-251:1194.0 255-307:200.0	1394	1.33e-177	304	1	268	0.8816	464995 No KEGG functional class	1	307	jgi|NeoGfMa1|369392|estExt_Genewise1.C_27_t10177	1	304	Neocallimastix sp. Gf-Ma3-1 v1.0	NeoGfMa1_GeneCatalog_proteins_20201119.aa
Pirfi3|580005	158-572:2076.0 10-109:354.0 107-144:167.0 115-148:104.0 75-100:94.0 113-138:133.0 26-51:94.0 75-100:69.0	3091	0	691	1.2059	518	0.7496	465072 No KEGG functional class	10	572	jgi|Pirfi3|580005|fgenesh2_kg.4_#_50_#_Locus185v1rpkm497.10	11	573	Piromyces finnis v3.0	Pirfi3_GeneCatalog_proteins_20160330.aa
PirE2_1|30615	190-569:1961.0	1961	0	380	1	340	0.8947	465072 No KEGG functional class	190	569	jgi|PirE2_1|30615|gw1.1595.5.1	1	380	Piromyces sp. E2 v1.0	PirE2_1_GeneCatalog_proteins_20110421.aa
Orpsp1_1|1183248	372-488:521.0 168-298:489.0 319-370:240.0 492-518:129.0 524-550:112.0 49-96:96.0 300-321:82.0 115-138:81.0 560-574:64.0 60-100:146.0 29-55:51.0	2011	0	531	0.8362	347	0.6535	465072 No KEGG functional class	29	574	jgi|Orpsp1_1|1183248|evm.model.c7180000084419.1	1	536	Orpinomyces sp.	Orpsp1_1_GeneCatalog_proteins_20140826.aa
Orpsp1_1|1181943	64-572:2457.0 1-59:281.0 109-148:87.0 75-100:82.0 26-51:87.0 75-98:65.0 24-49:107.0 113-138:106.0	3272	0	736	1.28	555	0.7541	465072 No KEGG functional class	1	572	jgi|Orpsp1_1|1181943|evm.model.c7180000079212.1	1	575	Orpinomyces sp.	Orpsp1_1_GeneCatalog_proteins_20140826.aa
Orpsp1_1|1180068	161-572:2103.0 55-145:374.0 1-59:257.0 109-148:91.0 75-100:88.0 26-51:95.0 75-107:70.0 113-138:105.0 24-49:103.0	3286	0	739	1.2897	558	0.7551	465072 No KEGG functional class	1	572	jgi|Orpsp1_1|1180068|evm.model.c7180000072012.1	1	573	Orpinomyces sp.	Orpsp1_1_GeneCatalog_proteins_20140826.aa
Neosp1|465072	1-574:3214.0 75-100:79.0 26-51:79.0 115-138:78.0 75-98:78.0 113-138:108.0 24-49:108.0	3744	0	726	1.2648	642	0.8843	465072 No KEGG functional class	1	574	jgi|Neosp1|465072|estExt_Genewise1Plus.C_3790048	1	574	Neocallimastix californiae G1 v1.0	Neosp1_GeneCatalog_proteins_20170918.aa
Caecom1|625282	372-488:518.0 167-254:323.0 319-367:234.0 256-300:170.0 24-76:134.0 492-518:133.0 524-550:108.0 72-102:99.0 115-138:86.0 300-321:74.0 560-572:62.0 1-27:52.0 60-101:162.0 26-49:75.0 115-140:83.0 81-107:74.0	2387	0	642	1.0808	400	0.6231	465072 No KEGG functional class	1	572	jgi|Caecom1|625282|estExt_Genemark1.C_2540017	1	593	Caecomyces churrovis A v1.0	Caecom1_GeneCatalog_proteins_20171213.aa
Caecom1|436955	164-473:1613.0 1-62:227.0 65-102:150.0 108-147:149.0 75-107:102.0 26-51:94.0 75-102:104.0 115-148:91.0 113-138:120.0	2650	0	597	1.2159	445	0.7454	465072 No KEGG functional class	1	473	jgi|Caecom1|436955|estExt_Genewise1Plus.C_4560005	1	491	Caecomyces churrovis A v1.0	Caecom1_GeneCatalog_proteins_20171213.aa
Anasp1|229961	372-488:524.0 163-300:507.0 319-367:238.0 492-518:129.0 24-68:121.0 524-550:108.0 72-96:96.0 300-321:85.0 115-138:84.0 560-574:63.0 1-18:57.0 54-102:161.0 26-55:46.0 83-98:64.0 115-133:57.0 135-149:42.0 113-147:101.0	2483	0	671	1.169	422	0.6289	465072 No KEGG functional class	1	574	jgi|Anasp1|229961|estExt_Genewise1Plus.C_400040	1	574	Anaeromyces robustus v1.0	Anasp1_GeneCatalog_proteins_20160330.aa
Anasp1|222663	163-572:2128.0 1-63:245.0 107-144:158.0 64-108:157.0 75-100:86.0 115-138:74.0 26-51:80.0 75-109:79.0 24-49:104.0 113-138:102.0	3213	0	719	1.2483	535	0.7441	465072 No KEGG functional class	1	572	jgi|Anasp1|222663|estExt_Genewise1.C_2090013	1	570	Anaeromyces robustus v1.0	Anasp1_GeneCatalog_proteins_20160330.aa
Pecora1|8606	301-404:289.0 255-306:169.0 1-85:158.0 103-125:85.0 129-153:75.0 400-415:54.0 226-281:112.0 66-102:78.0 384-420:60.0	1080	2.02e-77	435	1.0662	220	0.5057	499365 No KEGG functional class	1	420	jgi|Pecora1|8606|allA08791	1	407	Pecoramyces sp. F1	Pecora1_ExternalModels_proteins_2021-11-19.fasta
NeoWI3_1|945973	226-292:299.0 5-66:172.0 66-100:113.0 98-125:112.0 342-374:106.0 129-152:88.0 384-420:71.0 149-170:70.0 267-337:161.0 1-23:77.0	1269	4.65e-95	402	0.9393	246	0.6119	499365 No KEGG functional class	1	420	jgi|NeoWI3_1|945973|fgenesh2_kg.83___154___TRINITY_DN12082_c3_g1_i1	1	428	Neocallimastix sp. WI3-B v1.0	NeoWI3_1_GeneCatalog_proteins_20201119.aa
NeoWI3_1|918044	226-374:691.0 1-129:619.0 128-170:196.0 402-420:67.0	1573	0	340	0.8057	307	0.9029	499365 No KEGG functional class	1	420	jgi|NeoWI3_1|918044|fgenesh2_kg.23___429___TRINITY_DN11304_c0_g4_i1	1	422	Neocallimastix sp. WI3-B v1.0	NeoWI3_1_GeneCatalog_proteins_20201119.aa
Neosp1|702515	226-301:325.0 303-337:141.0 103-125:109.0 342-374:107.0 36-67:106.0 66-98:97.0 129-169:94.0 401-420:75.0 1-34:63.0	1117	1.45e-102	327	0.788	219	0.6697	499365 No KEGG functional class	1	420	jgi|Neosp1|702515|fgenesh2_kg.89_#_23_#_Locus11717v1rpkm2.12	1	415	Neocallimastix californiae G1 v1.0	Neosp1_GeneCatalog_proteins_20170918.aa
Neosp1|499365	226-420:931.0 1-170:877.0 188-209:109.0	1917	0	387	0.9214	380	0.9819	499365 No KEGG functional class	1	420	jgi|Neosp1|499365|fgenesh1_pg.6_#_19	1	420	Neocallimastix californiae G1 v1.0	Neosp1_GeneCatalog_proteins_20170918.aa
Neolan1|1314799	226-301:325.0 5-67:173.0 303-337:141.0 103-125:109.0 342-374:107.0 66-98:97.0 129-169:94.0 401-420:75.0	1121	5.66e-107	324	0.7624	218	0.6728	499365 No KEGG functional class	5	420	jgi|Neolan1|1314799|estExt_fgenesh1_pg.C_1080034	7	425	Neocallimastix lanati v1.0	Neolan1_GeneCatalog_proteins_20200610.aa
Neolan1|1272709	226-420:931.0 1-170:877.0 188-209:109.0	1917	0	387	0.9214	380	0.9819	499365 No KEGG functional class	1	420	jgi|Neolan1|1272709|fgenesh1_pm.25_#_117	1	420	Neocallimastix lanati v1.0	Neolan1_GeneCatalog_proteins_20200610.aa
NeoGfMa1|413971	226-374:691.0 1-129:619.0 128-170:196.0 402-420:67.0	1573	0	340	0.8057	307	0.9029	499365 No KEGG functional class	1	420	jgi|NeoGfMa1|413971|estExt_Genewise1Plus.C_480372	1	422	Neocallimastix sp. Gf-Ma3-1 v1.0	NeoGfMa1_GeneCatalog_proteins_20201119.aa
NeoGfMa1|407607	226-292:299.0 5-66:172.0 66-100:113.0 98-125:112.0 342-374:106.0 129-152:88.0 384-420:71.0 149-170:70.0 267-337:161.0 1-23:77.0	1269	4.7e-95	402	0.9393	246	0.6119	499365 No KEGG functional class	1	420	jgi|NeoGfMa1|407607|estExt_Genewise1Plus.C_290138	1	428	Neocallimastix sp. Gf-Ma3-1 v1.0	NeoGfMa1_GeneCatalog_proteins_20201119.aa
Anasp1|267512	258-294:128.0 1-54:116.0 308-337:116.0 104-125:67.0 67-77:43.0	470	1.48e-34	154	0.3649	88	0.5714	499365 No KEGG functional class	1	337	jgi|Anasp1|267512|estExt_fgenesh1_pg.C_900023	1	348	Anaeromyces robustus v1.0	Anasp1_GeneCatalog_proteins_20160330.aa
Pecora1|3716	67-141:213.0 40-71:60.0 172-185:54.0	327	3.62e-27	121	0.4432	55	0.4545	499478 No KEGG functional class	40	185	jgi|Pecora1|3716|allA03656	49	186	Pecoramyces sp. F1	Pecora1_ExternalModels_proteins_2021-11-19.fasta
Pecora1|3714	72-139:203.0 172-184:52.0	255	7.06e-22	81	0.3839	40	0.4938	499478 No KEGG functional class	72	184	jgi|Pecora1|3714|allA03654	20	127	Pecoramyces sp. F1	Pecora1_ExternalModels_proteins_2021-11-19.fasta
Orpsp1_1|1179897	72-139:203.0 40-60:54.0 172-184:52.0	309	7.49e-25	102	0.3984	49	0.4804	499478 No KEGG functional class	40	184	jgi|Orpsp1_1|1179897|evm.model.c7180000071254.1	48	182	Orpinomyces sp.	Orpsp1_1_GeneCatalog_proteins_20140826.aa
Orpsp1_1|1174078	67-141:213.0 40-71:60.0 172-185:54.0	327	3.07e-27	121	0.4449	55	0.4545	499478 No KEGG functional class	40	185	jgi|Orpsp1_1|1174078|evm.model.c7180000048839.1	49	186	Orpinomyces sp.	Orpsp1_1_GeneCatalog_proteins_20140826.aa
NeoWI3_1|836682	65-143:390.0 1-69:286.0 205-232:130.0 172-185:71.0	877	4.38e-96	190	0.7143	166	0.8737	499478 No KEGG functional class	1	232	jgi|NeoWI3_1|836682|MIX19791_25_96	1	223	Neocallimastix sp. WI3-B v1.0	NeoWI3_1_GeneCatalog_proteins_20201119.aa
Neosp1|499478	1-144:753.0 205-232:144.0 172-185:77.0 251-259:47.0	1021	1.25e-115	195	0.7529	195	1	499478 No KEGG functional class	1	259	jgi|Neosp1|499478|fgenesh1_pg.6_#_132	1	259	Neocallimastix californiae G1 v1.0	Neosp1_GeneCatalog_proteins_20170918.aa
Neolan1|1655959	1-144:753.0 205-232:144.0 172-185:77.0	974	6.33e-114	186	0.6667	186	1	499478 No KEGG functional class	1	232	jgi|Neolan1|1655959|fgenesh2_kg.25___112___TRINITY_DN1018_c1_g2_i1	1	232	Neocallimastix lanati v1.0	Neolan1_GeneCatalog_proteins_20200610.aa
NeoGfMa1|413735	65-143:390.0 1-69:286.0 205-232:130.0 172-185:71.0	877	4.43e-96	190	0.7143	166	0.8737	499478 No KEGG functional class	1	232	jgi|NeoGfMa1|413735|estExt_Genewise1Plus.C_480062	1	223	Neocallimastix sp. Gf-Ma3-1 v1.0	NeoGfMa1_GeneCatalog_proteins_20201119.aa
Caecom1|544067	66-139:180.0 40-69:82.0 172-184:51.0 1-22:42.0	355	9.32e-27	139	0.5305	62	0.446	499478 No KEGG functional class	1	184	jgi|Caecom1|544067|gm1.1855_g	1	178	Caecomyces churrovis A v1.0	Caecom1_GeneCatalog_proteins_20171213.aa
Caecom1|445707	77-140:179.0 40-71:81.0 172-184:55.0 1-22:51.0	366	3.35e-28	131	0.4645	65	0.4962	499478 No KEGG functional class	1	184	jgi|Caecom1|445707|fgenesh1_kg.25_#_37_#_TRINITY_DN11786_c0_g1_i1	1	187	Caecomyces churrovis A v1.0	Caecom1_GeneCatalog_proteins_20171213.aa
Pirfi3|587211	1-545:2076.0	2076	0	545	0.9191	366	0.6716	500392 No KEGG functional class	1	545	jgi|Pirfi3|587211|fgenesh2_kg.65_#_16_#_Locus1513v1rpkm22.28	1	545	Piromyces finnis v3.0	Pirfi3_GeneCatalog_proteins_20160330.aa
Pirfi3|583296	277-553:1128.0 9-275:1102.0	2230	0	544	0.9174	402	0.739	500392 No KEGG functional class	9	553	jgi|Pirfi3|583296|fgenesh2_kg.20_#_95_#_Locus1664v1rpkm19.86	8	551	Piromyces finnis v3.0	Pirfi3_GeneCatalog_proteins_20160330.aa
Pirfi3|361804	9-561:2070.0	2070	0	553	0.914	375	0.6781	500392 No KEGG functional class	9	561	jgi|Pirfi3|361804|estExt_Genewise1Plus.C_590045	8	560	Piromyces finnis v3.0	Pirfi3_GeneCatalog_proteins_20160330.aa
Pirfi3|326531	1-551:2405.0	2405	0	551	0.8873	432	0.784	500392 No KEGG functional class	1	551	jgi|Pirfi3|326531|estExt_Genewise1.C_20_t10367	1	551	Piromyces finnis v3.0	Pirfi3_GeneCatalog_proteins_20160330.aa
Orpsp1_1|1178343	277-553:1192.0 1-275:1087.0	2279	0	552	0.9309	407	0.7373	500392 No KEGG functional class	1	553	jgi|Orpsp1_1|1178343|evm.model.c7180000064929.1	1	552	Orpinomyces sp.	Orpsp1_1_GeneCatalog_proteins_20140826.aa
Caecom1|495155	1-559:2413.0	2413	0	559	0.9134	439	0.7853	500392 No KEGG functional class	1	559	jgi|Caecom1|495155|fgenesh1_pg.227_#_1	1	559	Caecomyces churrovis A v1.0	Caecom1_GeneCatalog_proteins_20171213.aa
Caecom1|264746	1-559:2413.0	2413	0	559	0.9134	439	0.7853	500392 No KEGG functional class	1	559	jgi|Caecom1|264746|CE264745_653	1	559	Caecomyces churrovis A v1.0	Caecom1_GeneCatalog_proteins_20171213.aa
Anasp1|298677	1-548:2101.0	2101	0	548	0.9288	378	0.6898	500392 No KEGG functional class	1	548	jgi|Anasp1|298677|estExt_Genemark1.C_8010001	1	548	Anaeromyces robustus v1.0	Anasp1_GeneCatalog_proteins_20160330.aa
Anasp1|268887	9-561:2104.0	2104	0	553	0.9217	384	0.6944	500392 No KEGG functional class	9	561	jgi|Anasp1|268887|estExt_fgenesh1_pg.C_1460002	9	561	Anaeromyces robustus v1.0	Anasp1_GeneCatalog_proteins_20160330.aa
Anasp1|267245	1-548:2328.0	2328	0	548	0.9149	420	0.7664	500392 No KEGG functional class	1	548	jgi|Anasp1|267245|estExt_fgenesh1_pg.C_820010	1	548	Anaeromyces robustus v1.0	Anasp1_GeneCatalog_proteins_20160330.aa
Pecora1|16237	82-169:351.0 172-236:263.0 36-80:138.0 4-21:50.0	802	6.73e-85	216	0.6034	145	0.6713	501524 No KEGG functional class	4	236	jgi|Pecora1|16237|allA17064	5	330	Pecoramyces sp. F1	Pecora1_ExternalModels_proteins_2021-11-19.fasta
Orpsp1_1|1188894	82-169:351.0 172-236:270.0 36-80:138.0 4-21:50.0	809	6.61e-86	216	0.605	146	0.6759	501524 No KEGG functional class	4	236	jgi|Orpsp1_1|1188894|evm.model.d7180000067982.1	5	330	Orpinomyces sp.	Orpsp1_1_GeneCatalog_proteins_20140826.aa
NeoWI3_1|934701	82-262:844.0 19-86:61.0 1-91:387.0	1292	6.74e-109	340	0.9632	245	0.7206	501524 No KEGG functional class	1	262	jgi|NeoWI3_1|934701|fgenesh2_kg.49___120___TRINITY_DN12652_c1_g4_i1	1	353	Neocallimastix sp. WI3-B v1.0	NeoWI3_1_GeneCatalog_proteins_20201119.aa
NeoWI3_1|813715	82-262:789.0 39-82:146.0 1-32:115.0	1050	3.95e-123	257	0.7219	190	0.7393	501524 No KEGG functional class	1	262	jgi|NeoWI3_1|813715|estExt_fgenesh1_pg.C_590116	1	356	Neocallimastix sp. WI3-B v1.0	NeoWI3_1_GeneCatalog_proteins_20201119.aa
Neosp1|664960	82-247:785.0 1-25:100.0 58-86:51.0 39-100:146.0	1082	7.43e-108	282	0.7944	196	0.695	501524 No KEGG functional class	1	247	jgi|Neosp1|664960|estExt_fgenesh1_pg.C_160120	1	341	Neocallimastix californiae G1 v1.0	Neosp1_GeneCatalog_proteins_20170918.aa
Neosp1|501524	1-262:1344.0	1344	2.61e-175	262	1	252	0.9618	501524 No KEGG functional class	1	262	jgi|Neosp1|501524|fgenesh1_pg.20_#_83	1	262	Neocallimastix californiae G1 v1.0	Neosp1_GeneCatalog_proteins_20170918.aa
Neolan1|1719088	82-262:898.0 54-86:50.0 1-91:448.0	1396	1.35e-115	305	0.8714	266	0.8721	501524 No KEGG functional class	1	262	jgi|Neolan1|1719088|fgenesh2_kg.106___174___TRINITY_DN1247_c2_g1_i4	1	350	Neocallimastix lanati v1.0	Neolan1_GeneCatalog_proteins_20200610.aa
Neolan1|974671	82-247:785.0 1-25:100.0 58-86:51.0 39-100:146.0	1082	9.88e-108	282	0.7944	196	0.695	501524 No KEGG functional class	1	247	jgi|Neolan1|974671|estExt_Genewise1.C_3_t10353	1	341	Neocallimastix lanati v1.0	Neolan1_GeneCatalog_proteins_20200610.aa
NeoGfMa1|678150	82-262:789.0 39-82:146.0 1-32:115.0	1050	3.99e-123	257	0.7219	190	0.7393	501524 No KEGG functional class	1	262	jgi|NeoGfMa1|678150|MIX71765_145_86	1	356	Neocallimastix sp. Gf-Ma3-1 v1.0	NeoGfMa1_GeneCatalog_proteins_20201119.aa
NeoGfMa1|604392	82-262:844.0 19-86:61.0 1-91:387.0	1292	6.82e-109	340	0.9632	245	0.7206	501524 No KEGG functional class	1	262	jgi|NeoGfMa1|604392|estExt_fgenesh1_pm.C_630086	1	353	Neocallimastix sp. Gf-Ma3-1 v1.0	NeoGfMa1_GeneCatalog_proteins_20201119.aa
Pirfi3|338401	73-498:1862.0 20-71:231.0	2093	0	478	0.8819	366	0.7657	503204 No KEGG functional class	20	498	jgi|Pirfi3|338401|estExt_Genewise1.C_750056	20	538	Piromyces finnis v3.0	Pirfi3_GeneCatalog_proteins_20160330.aa
PirE2_1|56978	126-498:1638.0	1638	0	373	0.9894	297	0.7962	503204 No KEGG functional class	126	498	jgi|PirE2_1|56978|fgenesh1_pg.5_#_13	1	373	Piromyces sp. E2 v1.0	PirE2_1_GeneCatalog_proteins_20110421.aa
Orpsp1_1|1192701	202-459:1114.0 453-498:220.0 33-53:103.0 55-71:81.0 18-34:64.0 118-149:58.0 74-229:529.0 36-51:70.0	2239	0	563	1.0199	401	0.7123	503204 No KEGG functional class	18	498	jgi|Orpsp1_1|1192701|evm.model.d7180000095272.1	18	546	Orpinomyces sp.	Orpsp1_1_GeneCatalog_proteins_20140826.aa
Orpsp1_1|1192496	141-498:1643.0	1643	0	358	0.989	296	0.8268	503204 No KEGG functional class	141	498	jgi|Orpsp1_1|1192496|evm.model.d7180000093787.1	1	358	Orpinomyces sp.	Orpsp1_1_GeneCatalog_proteins_20140826.aa
Orpsp1_1|1188300	74-459:1507.0 453-498:212.0 33-53:101.0 55-71:74.0 18-34:63.0 202-228:123.0 36-56:71.0 118-149:44.0	2195	0	567	1.0404	396	0.6984	503204 No KEGG functional class	18	498	jgi|Orpsp1_1|1188300|evm.model.d7180000063732.1	18	539	Orpinomyces sp.	Orpsp1_1_GeneCatalog_proteins_20140826.aa
Orpsp1_1|1174597	75-459:1557.0 453-498:219.0	1776	0	431	0.9795	321	0.7448	503204 No KEGG functional class	75	498	jgi|Orpsp1_1|1174597|evm.model.c7180000050695.1	13	437	Orpinomyces sp.	Orpsp1_1_GeneCatalog_proteins_20140826.aa
Anasp1|292095	199-498:1237.0 101-168:258.0 18-71:230.0 74-93:91.0 164-185:82.0 192-229:91.0 33-51:76.0 75-106:42.0	2107	0	553	0.984	375	0.6781	503204 No KEGG functional class	18	498	jgi|Anasp1|292095|estExt_Genemark1.C_760026	18	558	Anaeromyces robustus v1.0	Anasp1_GeneCatalog_proteins_20160330.aa
Anasp1|277414	72-498:1857.0 18-71:215.0	2072	0	481	0.8842	365	0.7588	503204 No KEGG functional class	18	498	jgi|Anasp1|277414|gm1.3680_g	17	539	Anaeromyces robustus v1.0	Anasp1_GeneCatalog_proteins_20160330.aa
Anasp1|235246	74-498:1845.0 34-53:108.0 58-71:71.0 18-33:51.0	2075	0	475	0.87	365	0.7684	503204 No KEGG functional class	18	498	jgi|Anasp1|235246|estExt_Genewise1Plus.C_2200008	19	540	Anaeromyces robustus v1.0	Anasp1_GeneCatalog_proteins_20160330.aa
Anasp1|218094	167-498:1483.0 74-164:385.0 33-72:194.0 18-34:57.0	2119	0	480	0.8856	376	0.7833	503204 No KEGG functional class	18	498	jgi|Anasp1|218094|estExt_Genewise1.C_580043	18	538	Anaeromyces robustus v1.0	Anasp1_GeneCatalog_proteins_20160330.aa
PirE2_1|55147	39-145:402.0 155-266:395.0 1-35:150.0	947	5.85e-113	254	0.5121	171	0.6732	503347 No KEGG functional class	1	266	jgi|PirE2_1|55147|estExt_Genewise1Plus.C_5210005	1	263	Piromyces sp. E2 v1.0	PirE2_1_GeneCatalog_proteins_20110421.aa
PirE2_1|55145	37-267:866.0 16-34:68.0	934	3.93e-116	250	0.641	165	0.66	503347 No KEGG functional class	16	267	jgi|PirE2_1|55145|estExt_Genewise1Plus.C_5210003	17	269	Piromyces sp. E2 v1.0	PirE2_1_GeneCatalog_proteins_20110421.aa
Pecora1|17296	7-266:1183.0	1183	4.57e-156	260	0.7855	215	0.8269	503347 No KEGG functional class	7	266	jgi|Pecora1|17296|allA18245	8	267	Pecoramyces sp. F1	Pecora1_ExternalModels_proteins_2021-11-19.fasta
Pecora1|13593	13-148:502.0 151-205:251.0 207-266:159.0 1-17:56.0	968	6.85e-111	268	0.7571	176	0.6567	503347 No KEGG functional class	1	266	jgi|Pecora1|13593|allA14087	1	265	Pecoramyces sp. F1	Pecora1_ExternalModels_proteins_2021-11-19.fasta
NeoWI3_1|763612	1-266:1329.0	1329	4.44e-176	266	0.8036	247	0.9286	503347 No KEGG functional class	1	266	jgi|NeoWI3_1|763612|estExt_Genemark4.C_400290	1	266	Neocallimastix sp. WI3-B v1.0	NeoWI3_1_GeneCatalog_proteins_20201119.aa
NeoWI3_1|532385	13-205:718.0 207-266:172.0 1-17:50.0	940	1.38e-111	270	0.8599	174	0.6444	503347 No KEGG functional class	1	266	jgi|NeoWI3_1|532385|estExt_Genewise1.C_15_t20017	1	266	Neocallimastix sp. WI3-B v1.0	NeoWI3_1_GeneCatalog_proteins_20201119.aa
Neosp1|503347	1-279:1470.0	1470	0	279	1	279	1	503347 No KEGG functional class	1	279	jgi|Neosp1|503347|fgenesh1_pg.36_#_21	1	279	Neocallimastix californiae G1 v1.0	Neosp1_GeneCatalog_proteins_20170918.aa
Neolan1|1325288	1-266:1401.0	1401	0	266	0.7893	265	0.9962	503347 No KEGG functional class	1	266	jgi|Neolan1|1325288|gm4.4898_g	1	266	Neocallimastix lanati v1.0	Neolan1_GeneCatalog_proteins_20200610.aa
NeoGfMa1|595663	1-266:1329.0	1329	4.49e-176	266	0.8036	247	0.9286	503347 No KEGG functional class	1	266	jgi|NeoGfMa1|595663|estExt_fgenesh1_pm.C_30105	1	266	Neocallimastix sp. Gf-Ma3-1 v1.0	NeoGfMa1_GeneCatalog_proteins_20201119.aa
NeoGfMa1|372010	13-205:718.0 207-266:172.0 1-17:50.0	940	1.4e-111	270	0.8599	174	0.6444	503347 No KEGG functional class	1	266	jgi|NeoGfMa1|372010|estExt_Genewise1.C_34_t10475	1	266	Neocallimastix sp. Gf-Ma3-1 v1.0	NeoGfMa1_GeneCatalog_proteins_20201119.aa
PirE2_1|11524	48-109:201.0 6-52:145.0	346	4e-36	109	0.5707	65	0.5963	504001 No KEGG functional class	6	109	jgi|PirE2_1|11524|gm1.10470_g	8	112	Piromyces sp. E2 v1.0	PirE2_1_GeneCatalog_proteins_20110421.aa
PirE2_1|1606	46-109:206.0 1-49:141.0	347	2.9e-36	113	0.4934	63	0.5575	504001 No KEGG functional class	1	109	jgi|PirE2_1|1606|gm1.552_g	1	112	Piromyces sp. E2 v1.0	PirE2_1_GeneCatalog_proteins_20110421.aa
Pecora1|965	46-109:196.0 1-44:155.0	351	1.2e-36	108	0.5714	66	0.6111	504001 No KEGG functional class	1	109	jgi|Pecora1|965|allA00990	1	112	Pecoramyces sp. F1	Pecora1_ExternalModels_proteins_2021-11-19.fasta
Pecora1|811	47-109:195.0 5-42:138.0	333	3.79e-34	101	0.472	61	0.604	504001 No KEGG functional class	5	109	jgi|Pecora1|811|allA00768	6	113	Pecoramyces sp. F1	Pecora1_ExternalModels_proteins_2021-11-19.fasta
NeoWI3_1|948044	47-108:179.0 1-47:144.0	323	1.57e-32	109	0.4977	60	0.5505	504001 No KEGG functional class	1	108	jgi|NeoWI3_1|948044|fgenesh2_kg.100___21___TRINITY_DN14460_c0_g1_i1	1	111	Neocallimastix sp. WI3-B v1.0	NeoWI3_1_GeneCatalog_proteins_20201119.aa
NeoWI3_1|773312	47-108:191.0 1-31:94.0 32-44:73.0	358	4.43e-33	106	0.4775	67	0.6321	504001 No KEGG functional class	1	108	jgi|NeoWI3_1|773312|fgenesh1_pm.9_#_187	1	112	Neocallimastix sp. WI3-B v1.0	NeoWI3_1_GeneCatalog_proteins_20201119.aa
Neosp1|504001	1-109:518.0	518	3.71e-65	109	1	96	0.8807	504001 No KEGG functional class	1	109	jgi|Neosp1|504001|fgenesh1_pg.42_#_11	1	109	Neocallimastix californiae G1 v1.0	Neosp1_GeneCatalog_proteins_20170918.aa
Neolan1|1713952	1-109:518.0	518	4.95e-65	109	1	96	0.8807	504001 No KEGG functional class	1	109	jgi|Neolan1|1713952|fgenesh2_kg.98___46___TRINITY_DN16154_c1_g1_i1	1	109	Neocallimastix lanati v1.0	Neolan1_GeneCatalog_proteins_20200610.aa
NeoGfMa1|572823	47-108:179.0 1-47:144.0	323	1.59e-32	109	0.4977	60	0.5505	504001 No KEGG functional class	1	108	jgi|NeoGfMa1|572823|estExt_Genemark4.C_390120	1	111	Neocallimastix sp. Gf-Ma3-1 v1.0	NeoGfMa1_GeneCatalog_proteins_20201119.aa
NeoGfMa1|553049	47-108:191.0 1-31:94.0 32-44:73.0	358	4.48e-33	106	0.4775	67	0.6321	504001 No KEGG functional class	1	108	jgi|NeoGfMa1|553049|fgenesh1_pm.23_#_64	1	112	Neocallimastix sp. Gf-Ma3-1 v1.0	NeoGfMa1_GeneCatalog_proteins_20201119.aa
NeoGfMa1|636564	31-208:643.0 263-426:625.0 423-521:335.0 536-593:175.0 237-269:91.0 537-567:114.0 37-63:60.0 20-45:52.0 530-569:120.0 566-590:53.0	2268	0	681	0.7739	398	0.5844	504126 No KEGG functional class	20	593	jgi|NeoGfMa1|636564|MIX30179_17_16	19	796	Neocallimastix sp. Gf-Ma3-1 v1.0	NeoGfMa1_GeneCatalog_proteins_20201119.aa
NeoGfMa1|636558	36-307:1012.0 424-518:325.0 317-387:283.0 527-593:170.0 1-19:47.0 375-426:176.0 530-567:116.0 569-585:56.0 522-568:115.0 36-65:58.0 537-567:114.0 37-63:53.0	2525	0	766	0.7562	437	0.5705	504126 No KEGG functional class	1	593	jgi|NeoGfMa1|636558|MIX30173_182_31	1	917	Neocallimastix sp. Gf-Ma3-1 v1.0	NeoGfMa1_GeneCatalog_proteins_20201119.aa
NeoGfMa1|586563	35-383:1366.0 428-524:345.0 525-622:301.0 375-426:189.0 537-565:114.0 1-43:73.0 527-544:63.0 536-567:121.0 36-62:62.0	2634	0	745	0.8544	465	0.6242	504126 No KEGG functional class	1	622	jgi|NeoGfMa1|586563|estExt_fgenesh1_pg.C_230066	1	783	Neocallimastix sp. Gf-Ma3-1 v1.0	NeoGfMa1_GeneCatalog_proteins_20201119.aa
NeoGfMa1|583144	36-251:729.0 309-380:318.0 430-507:250.0 245-300:203.0 382-421:174.0 516-552:70.0 1-36:69.0 558-588:49.0 529-552:84.0 546-566:82.0 35-62:72.0 539-569:92.0 35-62:70.0 573-589:56.0 539-570:83.0 297-328:68.0 567-583:55.0 539-572:81.0 35-62:67.0 572-583:46.0	2718	0	870	0.8657	473	0.5437	504126 No KEGG functional class	1	589	jgi|NeoGfMa1|583144|estExt_fgenesh1_pg.C_9_t20040	1	914	Neocallimastix sp. Gf-Ma3-1 v1.0	NeoGfMa1_GeneCatalog_proteins_20201119.aa
NeoGfMa1|570438	224-428:817.0 47-216:631.0 527-593:186.0 464-521:175.0 421-475:157.0 537-567:131.0 530-543:44.0 547-589:94.0 36-64:78.0 530-547:62.0 530-567:97.0 573-586:47.0	2519	0	742	0.7347	432	0.5822	504126 No KEGG functional class	36	593	jgi|NeoGfMa1|570438|estExt_Genemark4.C_25_t10355	46	926	Neocallimastix sp. Gf-Ma3-1 v1.0	NeoGfMa1_GeneCatalog_proteins_20201119.aa
NeoGfMa1|418367	121-259:454.0 35-122:341.0 425-525:290.0 311-383:284.0 265-308:169.0 527-565:128.0 567-616:96.0 375-426:180.0 539-565:76.0 524-546:68.0 573-583:49.0 36-66:71.0 539-565:69.0 529-540:60.0 21-38:48.0	2383	0	735	0.8277	406	0.5524	504126 No KEGG functional class	21	616	jgi|NeoGfMa1|418367|estExt_Genewise1Plus.C_710104	34	793	Neocallimastix sp. Gf-Ma3-1 v1.0	NeoGfMa1_GeneCatalog_proteins_20201119.aa
NeoGfMa1|406142	31-221:683.0 223-387:644.0 423-521:317.0 522-593:175.0 1-19:45.0 375-420:169.0 527-571:119.0 572-593:50.0 20-46:47.0 537-567:102.0 37-63:63.0 530-540:61.0 529-565:100.0 45-69:57.0 530-567:96.0 573-591:47.0	2775	0	874	0.7707	478	0.5469	504126 No KEGG functional class	1	593	jgi|NeoGfMa1|406142|estExt_Genewise1Plus.C_25_t20033	1	1054	Neocallimastix sp. Gf-Ma3-1 v1.0	NeoGfMa1_GeneCatalog_proteins_20201119.aa
NeoGfMa1|396597	61-212:502.0 430-553:384.0 319-427:367.0 262-308:162.0 224-259:124.0 566-589:56.0 44-62:53.0 519-591:191.0 35-62:63.0 519-572:152.0 565-589:71.0 44-62:51.0 521-572:146.0 566-589:63.0 525-565:156.0 44-62:56.0 539-566:77.0 527-546:71.0 566-593:59.0	2804	0	922	1.1016	453	0.4913	504126 No KEGG functional class	35	593	jgi|NeoGfMa1|396597|estExt_Genewise1Plus.C_9_t30146	19	837	Neocallimastix sp. Gf-Ma3-1 v1.0	NeoGfMa1_GeneCatalog_proteins_20201119.aa
NeoGfMa1|324812	1-619:3065.0	3065	0	619	0.9904	545	0.8805	504126 No KEGG functional class	1	619	jgi|NeoGfMa1|324812|e_gw1.31.233.1	1	619	Neocallimastix sp. Gf-Ma3-1 v1.0	NeoGfMa1_GeneCatalog_proteins_20201119.aa
NeoGfMa1|321132	215-383:628.0 17-216:622.0 527-593:194.0 421-463:153.0 488-521:104.0 463-491:86.0 375-425:180.0 547-587:96.0 522-547:66.0 553-587:92.0 36-66:71.0 537-558:66.0 537-567:112.0 37-63:60.0 530-567:98.0 573-588:56.0 518-572:99.0 370-424:50.0 571-583:50.0	2883	0	983	0.9052	501	0.5097	504126 No KEGG functional class	17	593	jgi|NeoGfMa1|321132|e_gw1.25.134.1	15	1000	Neocallimastix sp. Gf-Ma3-1 v1.0	NeoGfMa1_GeneCatalog_proteins_20201119.aa
Pirfi3|416132	113-578:1694.0 14-112:330.0 602-619:74.0 624-640:73.0	2171	0	600	0.8798	377	0.6283	505319 No KEGG functional class	14	640	jgi|Pirfi3|416132|estExt_fgenesh1_pg.C_650013	15	647	Piromyces finnis v3.0	Pirfi3_GeneCatalog_proteins_20160330.aa
Pirfi3|353806	144-294:468.0 351-485:399.0 485-576:330.0 20-112:295.0 290-346:223.0 602-641:147.0 110-141:84.0 1-19:49.0	1995	0	619	0.7689	348	0.5622	505319 No KEGG functional class	1	641	jgi|Pirfi3|353806|estExt_Genewise1Plus.C_240350	1	619	Piromyces finnis v3.0	Pirfi3_GeneCatalog_proteins_20160330.aa
Pirfi3|337294	103-579:1585.0 17-110:289.0 592-639:161.0	2035	0	619	0.8856	357	0.5767	505319 No KEGG functional class	17	639	jgi|Pirfi3|337294|estExt_Genewise1.C_630077	19	655	Piromyces finnis v3.0	Pirfi3_GeneCatalog_proteins_20160330.aa
NeoWI3_1|889082	1-582:2910.0 602-678:391.0	3301	0	659	0.9649	605	0.9181	505319 No KEGG functional class	1	678	jgi|NeoWI3_1|889082|fgenesh2_kg.1___1827___TRINITY_DN12714_c2_g2_i1	1	683	Neocallimastix sp. WI3-B v1.0	NeoWI3_1_GeneCatalog_proteins_20201119.aa
NeoWI3_1|767153	110-589:1584.0 596-640:160.0 19-127:288.0 609-643:70.0 1-22:48.0	2150	0	691	1.1021	374	0.5412	505319 No KEGG functional class	1	643	jgi|NeoWI3_1|767153|estExt_Genemark4.C_680174	1	627	Neocallimastix sp. WI3-B v1.0	NeoWI3_1_GeneCatalog_proteins_20201119.aa
NeoWI3_1|533003	93-580:1599.0 600-640:163.0 20-110:276.0 609-643:71.0	2109	0	655	1.0447	369	0.5634	505319 No KEGG functional class	20	643	jgi|NeoWI3_1|533003|estExt_Genewise1.C_16_t10083	22	627	Neocallimastix sp. WI3-B v1.0	NeoWI3_1_GeneCatalog_proteins_20201119.aa
NeoGfMa1|678476	110-589:1584.0 596-640:160.0 19-127:288.0 609-643:70.0 1-22:48.0	2150	0	691	1.1021	374	0.5412	505319 No KEGG functional class	1	643	jgi|NeoGfMa1|678476|MIX72091_9_28	1	627	Neocallimastix sp. Gf-Ma3-1 v1.0	NeoGfMa1_GeneCatalog_proteins_20201119.aa
NeoGfMa1|561640	1-582:2910.0 602-678:391.0	3301	0	659	0.9649	605	0.9181	505319 No KEGG functional class	1	678	jgi|NeoGfMa1|561640|estExt_Genemark4.C_1_t10445	1	683	Neocallimastix sp. Gf-Ma3-1 v1.0	NeoGfMa1_GeneCatalog_proteins_20201119.aa
NeoGfMa1|405861	93-580:1599.0 600-640:163.0 20-110:276.0 609-643:71.0	2109	0	655	1.0447	369	0.5634	505319 No KEGG functional class	20	643	jgi|NeoGfMa1|405861|estExt_Genewise1Plus.C_25_t10149	22	627	Neocallimastix sp. Gf-Ma3-1 v1.0	NeoGfMa1_GeneCatalog_proteins_20201119.aa
Anasp1|222214	385-579:599.0 103-314:566.0 21-110:265.0 351-380:107.0 602-626:66.0 629-642:66.0 1-19:54.0 302-347:194.0 550-578:66.0	1983	0	660	1.046	345	0.5227	505319 No KEGG functional class	1	642	jgi|Anasp1|222214|estExt_Genewise1.C_1920027	1	631	Anaeromyces robustus v1.0	Anasp1_GeneCatalog_proteins_20160330.aa
Pirfi3|586229	34-502:2152.0 1-31:105.0	2257	0	500	0.8052	412	0.824	509421 No KEGG functional class	1	502	jgi|Pirfi3|586229|fgenesh2_kg.46_#_64_#_Locus5656v1rpkm3.28	1	621	Piromyces finnis v3.0	Pirfi3_GeneCatalog_proteins_20160330.aa
PirE2_1|59474	34-502:2162.0 1-24:78.0	2240	0	493	0.9536	416	0.8438	509421 No KEGG functional class	1	502	jgi|PirE2_1|59474|fgenesh1_pg.66_#_21	1	517	Piromyces sp. E2 v1.0	PirE2_1_GeneCatalog_proteins_20110421.aa
Pecora1|4394	29-502:2154.0 1-32:116.0	2270	0	506	0.8228	419	0.8281	509421 No KEGG functional class	1	502	jgi|Pecora1|4394|allA04431	1	614	Pecoramyces sp. F1	Pecora1_ExternalModels_proteins_2021-11-19.fasta
Orpsp1_1|1190222	29-502:2153.0	2153	0	474	0.924	398	0.8397	509421 No KEGG functional class	29	502	jgi|Orpsp1_1|1190222|evm.model.d7180000077548.1	40	513	Orpinomyces sp.	Orpsp1_1_GeneCatalog_proteins_20140826.aa
NeoWI3_1|801307	34-502:2355.0 1-32:129.0	2484	0	501	0.9507	468	0.9341	509421 No KEGG functional class	1	502	jgi|NeoWI3_1|801307|estExt_fgenesh1_pg.C_6_t10132	1	527	Neocallimastix sp. WI3-B v1.0	NeoWI3_1_GeneCatalog_proteins_20201119.aa
Neosp1|509421	1-502:2579.0	2579	0	502	1	487	0.9701	509421 No KEGG functional class	1	502	jgi|Neosp1|509421|fgenesh1_pg.110_#_45	1	502	Neocallimastix californiae G1 v1.0	Neosp1_GeneCatalog_proteins_20170918.aa
Neolan1|1738826	34-502:2411.0 1-33:168.0	2579	0	502	0.8149	487	0.9701	509421 No KEGG functional class	1	502	jgi|Neolan1|1738826|fgenesh2_kg.152___428___TRINITY_DN3858_c1_g1_i1	1	616	Neocallimastix lanati v1.0	Neolan1_GeneCatalog_proteins_20200610.aa
NeoGfMa1|355933	1-502:2517.0	2517	0	502	1	473	0.9422	509421 No KEGG functional class	1	502	jgi|NeoGfMa1|355933|estExt_Genewise1.C_6_t30407	1	502	Neocallimastix sp. Gf-Ma3-1 v1.0	NeoGfMa1_GeneCatalog_proteins_20201119.aa
Caecom1|437134	34-502:2171.0 1-31:109.0	2280	0	500	0.8065	425	0.85	509421 No KEGG functional class	1	502	jgi|Caecom1|437134|estExt_Genewise1Plus.C_4780005	1	620	Caecomyces churrovis A v1.0	Caecom1_GeneCatalog_proteins_20171213.aa
Anasp1|325566	34-502:2205.0 1-32:125.0	2330	0	501	0.7853	434	0.8663	509421 No KEGG functional class	1	502	jgi|Anasp1|325566|fgenesh2_kg.39_#_18_#_Locus4536v1rpkm7.22	1	638	Anaeromyces robustus v1.0	Anasp1_GeneCatalog_proteins_20160330.aa
NeoWI3_1|792479	165-568:1429.0 1-60:173.0 124-159:156.0 86-116:79.0	1837	0	531	0.6277	330	0.6215	509615 No KEGG functional class	1	568	jgi|NeoWI3_1|792479|estExt_fgenesh1_pm.C_240140	5	573	Neocallimastix sp. WI3-B v1.0	NeoWI3_1_GeneCatalog_proteins_20201119.aa
NeoWI3_1|791566	84-573:2374.0 1-66:286.0	2660	0	556	0.9424	494	0.8885	509615 No KEGG functional class	1	573	jgi|NeoWI3_1|791566|estExt_fgenesh1_pm.C_190113	1	573	Neocallimastix sp. WI3-B v1.0	NeoWI3_1_GeneCatalog_proteins_20201119.aa
Neolan1|1670823	162-571:1504.0 1-66:225.0 118-162:137.0 84-116:118.0	1984	0	554	0.8484	359	0.648	509615 No KEGG functional class	1	571	jgi|Neolan1|1670823|fgenesh2_kg.37___814___TRINITY_DN478_c2_g1_i1	1	567	Neocallimastix lanati v1.0	Neolan1_GeneCatalog_proteins_20200610.aa
Neolan1|1666767	165-529:1305.0 14-66:183.0 86-116:117.0 126-156:114.0 536-563:71.0	1790	0	508	0.8581	313	0.6161	509615 No KEGG functional class	14	563	jgi|Neolan1|1666767|fgenesh2_kg.34___380___TRINITY_DN258_c3_g1_i1	18	561	Neocallimastix lanati v1.0	Neolan1_GeneCatalog_proteins_20200610.aa
Neolan1|1433093	165-569:1424.0 1-60:175.0 120-159:157.0 86-116:85.0	1841	0	536	0.6489	333	0.6213	509615 No KEGG functional class	1	569	jgi|Neolan1|1433093|estExt_Genemark4.C_1190074	5	574	Neocallimastix lanati v1.0	Neolan1_GeneCatalog_proteins_20200610.aa
Neolan1|1278947	165-294:458.0 328-427:375.0 444-576:325.0 13-66:177.0 119-162:140.0 86-116:93.0 303-330:54.0	1622	0	520	0.7761	283	0.5442	509615 No KEGG functional class	13	576	jgi|Neolan1|1278947|fgenesh1_pm.85_#_40	1	561	Neocallimastix lanati v1.0	Neolan1_GeneCatalog_proteins_20200610.aa
Neolan1|1074266	165-294:457.0 328-429:370.0 445-562:313.0 1-66:208.0 119-157:108.0 86-122:104.0 311-330:43.0	1603	0	512	0.7518	282	0.5508	509615 No KEGG functional class	1	562	jgi|Neolan1|1074266|fgenesh1_pg.23_#_54	1	559	Neocallimastix lanati v1.0	Neolan1_GeneCatalog_proteins_20200610.aa
Neolan1|1047215	338-568:713.0 161-309:564.0 120-162:147.0 84-117:106.0 47-64:62.0 311-358:138.0	1730	0	523	0.5381	306	0.5851	509615 No KEGG functional class	47	568	jgi|Neolan1|1047215|estExt_Genewise1Plus.C_660137	1	522	Neocallimastix lanati v1.0	Neolan1_GeneCatalog_proteins_20200610.aa
Neolan1|1009325	84-572:2604.0 1-66:313.0	2917	0	555	0.8284	552	0.9946	509615 No KEGG functional class	1	572	jgi|Neolan1|1009325|estExt_Genewise1.C_1170058	1	572	Neocallimastix lanati v1.0	Neolan1_GeneCatalog_proteins_20200610.aa
Neolan1|1002571	306-573:901.0 161-308:583.0 2-60:181.0 124-157:135.0 92-116:60.0	1860	0	534	0.7285	330	0.618	509615 No KEGG functional class	2	573	jgi|Neolan1|1002571|estExt_Genewise1.C_810116	6	575	Neocallimastix lanati v1.0	Neolan1_GeneCatalog_proteins_20200610.aa
Neolan1|1355084	1-421:1645.0 498-552:213.0 430-500:189.0	2047	0	547	0.8752	372	0.6801	511017 No KEGG functional class	1	552	jgi|Neolan1|1355084|gm4.34694_g	1	548	Neocallimastix lanati v1.0	Neolan1_GeneCatalog_proteins_20200610.aa
Neolan1|1298382	135-420:1062.0 1-137:458.0 500-552:182.0 430-500:176.0	1878	0	547	0.9056	344	0.6289	511017 No KEGG functional class	1	552	jgi|Neolan1|1298382|estExt_fgenesh1_pm.C_1560002	1	547	Neocallimastix lanati v1.0	Neolan1_GeneCatalog_proteins_20200610.aa
Neolan1|1297392	1-421:1561.0 430-488:180.0 500-553:178.0	1919	0	534	0.9144	343	0.6423	511017 No KEGG functional class	1	553	jgi|Neolan1|1297392|estExt_fgenesh1_pm.C_1290024	1	549	Neocallimastix lanati v1.0	Neolan1_GeneCatalog_proteins_20200610.aa
Neolan1|1281630	1-420:1633.0 494-557:206.0 430-500:185.0	2024	0	555	0.9407	366	0.6595	511017 No KEGG functional class	1	557	jgi|Neolan1|1281630|fgenesh1_pm.129_#_21	1	553	Neocallimastix lanati v1.0	Neolan1_GeneCatalog_proteins_20200610.aa
Neolan1|1279823	1-580:2878.0	2878	0	580	0.9667	551	0.95	511017 No KEGG functional class	1	580	jgi|Neolan1|1279823|fgenesh1_pm.99_#_3	1	580	Neocallimastix lanati v1.0	Neolan1_GeneCatalog_proteins_20200610.aa
Neolan1|1058631	1-420:1876.0 430-553:465.0 569-580:43.0	2384	0	556	0.9345	435	0.7824	511017 No KEGG functional class	1	580	jgi|Neolan1|1058631|estExt_Genewise1Plus.C_1290075	1	575	Neocallimastix lanati v1.0	Neolan1_GeneCatalog_proteins_20200610.aa
Neolan1|1036926	1-556:2452.0	2452	0	556	0.936	459	0.8255	511017 No KEGG functional class	1	556	jgi|Neolan1|1036926|estExt_Genewise1Plus.C_310353	1	556	Neocallimastix lanati v1.0	Neolan1_GeneCatalog_proteins_20200610.aa
Neolan1|1036920	1-494:1941.0 500-554:201.0	2142	0	549	0.8971	394	0.7177	511017 No KEGG functional class	1	554	jgi|Neolan1|1036920|estExt_Genewise1Plus.C_310347	1	552	Neocallimastix lanati v1.0	Neolan1_GeneCatalog_proteins_20200610.aa
Neolan1|1036917	1-420:1684.0 494-559:213.0 430-500:197.0	2094	0	557	0.9283	375	0.6732	511017 No KEGG functional class	1	559	jgi|Neolan1|1036917|estExt_Genewise1Plus.C_310344	1	555	Neocallimastix lanati v1.0	Neolan1_GeneCatalog_proteins_20200610.aa
Neolan1|955298	5-420:1658.0 500-552:209.0 430-488:190.0	2057	0	528	0.88	373	0.7064	511017 No KEGG functional class	5	552	jgi|Neolan1|955298|e_gw1.99.171.1	4	547	Neocallimastix lanati v1.0	Neolan1_GeneCatalog_proteins_20200610.aa
Pecora1|2046	12-274:944.0	944	8.16e-123	263	0.5871	169	0.6426	512757 No KEGG functional class	12	274	jgi|Pecora1|2046|allA02034	8	270	Pecoramyces sp. F1	Pecora1_ExternalModels_proteins_2021-11-19.fasta
Pecora1|2045	111-274:675.0 1-112:399.0	1074	3.53e-135	276	0.734	198	0.7174	512757 No KEGG functional class	1	274	jgi|Pecora1|2045|allA02033	3	277	Pecoramyces sp. F1	Pecora1_ExternalModels_proteins_2021-11-19.fasta
NeoWI3_1|561929	1-275:1445.0 293-303:46.0	1491	0	286	0.9439	274	0.958	512757 No KEGG functional class	1	303	jgi|NeoWI3_1|561929|estExt_Genewise1Plus.C_1_t40157	1	303	Neocallimastix sp. WI3-B v1.0	NeoWI3_1_GeneCatalog_proteins_20201119.aa
NeoWI3_1|512630	26-275:941.0	941	3.62e-122	250	0.7267	167	0.668	512757 No KEGG functional class	26	275	jgi|NeoWI3_1|512630|e_gw1.83.17.1	26	275	Neocallimastix sp. WI3-B v1.0	NeoWI3_1_GeneCatalog_proteins_20201119.aa
Neosp1|512757	1-275:1475.0 293-303:65.0	1540	0	286	0.9439	286	1	512757 No KEGG functional class	1	303	jgi|Neosp1|512757|fgenesh1_pg.176_#_44	1	303	Neocallimastix californiae G1 v1.0	Neosp1_GeneCatalog_proteins_20170918.aa
Neosp1|383222	23-275:950.0	950	1.39e-123	253	0.7229	168	0.664	512757 No KEGG functional class	23	275	jgi|Neosp1|383222|estExt_Genewise1.C_890127	23	275	Neocallimastix californiae G1 v1.0	Neosp1_GeneCatalog_proteins_20170918.aa
Neolan1|1620569	1-275:1475.0 293-303:65.0	1540	0	286	0.9439	286	1	512757 No KEGG functional class	1	303	jgi|Neolan1|1620569|fgenesh2_kg.2___2107___TRINITY_DN8806_c0_g1_i1	1	303	Neocallimastix lanati v1.0	Neolan1_GeneCatalog_proteins_20200610.aa
Neolan1|957104	23-275:950.0	950	1.88e-123	253	0.7229	168	0.664	512757 No KEGG functional class	23	275	jgi|Neolan1|957104|e_gw1.108.139.1	23	275	Neocallimastix lanati v1.0	Neolan1_GeneCatalog_proteins_20200610.aa
Caecom1|526816	16-274:957.0	957	1.15e-124	259	0.7618	170	0.6564	512757 No KEGG functional class	16	274	jgi|Caecom1|526816|estExt_fgenesh1_pg.C_1440022	11	269	Caecomyces churrovis A v1.0	Caecom1_GeneCatalog_proteins_20171213.aa
Anasp1|235266	26-274:958.0	958	7.35e-125	249	0.7324	168	0.6747	512757 No KEGG functional class	26	274	jgi|Anasp1|235266|estExt_Genewise1Plus.C_2220002	26	274	Anaeromyces robustus v1.0	Anasp1_GeneCatalog_proteins_20160330.aa
NeoWI3_1|709555	94-191:372.0 185-232:168.0 1-36:98.0 32-52:55.0 48-65:53.0	746	4.83e-74	221	0.4325	148	0.6697	512874 No KEGG functional class	1	232	jgi|NeoWI3_1|709555|gm4.3232_g	1	216	Neocallimastix sp. WI3-B v1.0	NeoWI3_1_GeneCatalog_proteins_20201119.aa
NeoWI3_1|464732	140-188:118.0 104-135:114.0 195-237:103.0 1-23:98.0 31-44:43.0 48-70:43.0	519	5.97e-40	184	0.8402	103	0.5598	512874 No KEGG functional class	1	237	jgi|NeoWI3_1|464732|e_gw1.3.1835.1	1	218	Neocallimastix sp. WI3-B v1.0	NeoWI3_1_GeneCatalog_proteins_20201119.aa
Neosp1|512874	1-237:1156.0	1156	2.49e-149	237	1	227	0.9578	512874 No KEGG functional class	1	237	jgi|Neosp1|512874|fgenesh1_pg.180_#_16	1	237	Neocallimastix californiae G1 v1.0	Neosp1_GeneCatalog_proteins_20170918.aa
Neosp1|512814	137-180:147.0 103-137:131.0 184-232:98.0 1-23:62.0 20-70:55.0 84-102:48.0 142-184:146.0 213-233:56.0 189-204:43.0 164-184:70.0 46-70:64.0 100-118:58.0 126-135:58.0	1036	5.18e-39	376	0.3064	198	0.5266	512874 No KEGG functional class	1	233	jgi|Neosp1|512814|fgenesh1_pg.178_#_23	1	712	Neocallimastix californiae G1 v1.0	Neosp1_GeneCatalog_proteins_20170918.aa
Neolan1|1438009	142-184:144.0 103-137:133.0 189-232:122.0 1-23:73.0 84-102:47.0 48-70:46.0 142-192:116.0 184-233:116.0 12-44:50.0 137-179:129.0 121-137:72.0 48-70:61.0 103-118:56.0 189-231:110.0 155-182:44.0	1319	9.84e-42	491	0.3495	259	0.5275	512874 No KEGG functional class	1	233	jgi|Neolan1|1438009|estExt_Genemark4.C_3190003	1	1164	Neocallimastix lanati v1.0	Neolan1_GeneCatalog_proteins_20200610.aa
Neolan1|1425538	140-184:155.0 103-137:128.0 189-232:122.0 1-23:73.0 84-102:47.0 48-70:46.0 141-177:119.0 184-233:118.0 12-44:50.0 137-179:121.0 121-136:67.0 48-70:61.0 103-118:56.0 189-231:106.0 155-182:57.0	1326	2.07e-42	478	0.3236	259	0.5418	512874 No KEGG functional class	1	233	jgi|Neolan1|1425538|estExt_Genemark4.C_450037	1	1164	Neocallimastix lanati v1.0	Neolan1_GeneCatalog_proteins_20200610.aa
Neolan1|1383280	142-184:144.0 103-137:134.0 189-232:122.0 1-23:73.0 84-102:47.0 48-70:46.0 141-177:119.0 184-231:108.0 12-44:50.0 137-179:125.0 122-137:68.0 48-70:61.0 103-118:56.0 189-231:106.0 155-182:57.0	1316	6.84e-42	474	0.3417	257	0.5422	512874 No KEGG functional class	1	232	jgi|Neolan1|1383280|MIX18155_9_13	1	1116	Neocallimastix lanati v1.0	Neolan1_GeneCatalog_proteins_20200610.aa
Neolan1|1081777	1-237:1152.0	1152	1.17e-148	237	1	226	0.9536	512874 No KEGG functional class	1	237	jgi|Neolan1|1081777|fgenesh1_pg.74_#_67	1	237	Neocallimastix lanati v1.0	Neolan1_GeneCatalog_proteins_20200610.aa
Neolan1|1068009	137-177:143.0 103-137:118.0 188-229:101.0 1-23:75.0 84-102:47.0 48-70:46.0	530	8.77e-39	183	0.274	100	0.5464	512874 No KEGG functional class	1	229	jgi|Neolan1|1068009|estExt_Genewise1Plus.C_8300004	1	638	Neocallimastix lanati v1.0	Neolan1_GeneCatalog_proteins_20200610.aa
NeoGfMa1|335715	96-191:211.0 183-235:164.0	375	8.82e-38	149	1.042	76	0.5101	512874 No KEGG functional class	96	235	jgi|NeoGfMa1|335715|e_gw1.57.190.1	3	143	Neocallimastix sp. Gf-Ma3-1 v1.0	NeoGfMa1_GeneCatalog_proteins_20201119.aa
Piromy_p0_1|487363	772-795:90.0 813-856:76.0 227-252:72.0 287-311:72.0 500-532:59.0 460-475:44.0 693-706:43.0	456	7.77e-21	182	0.2167	86	0.4725	512879 No KEGG functional class	227	856	jgi|Piromy_p0_1|487363|estExt_Genemark4.C_chromosome_9_t20453	471	834	Piromyces sp. UH3-1 v2.0	Piromy_p0_1_GeneCatalog_proteins_20200513.aa
Piromy_p0_1|475545	108-207:203.0 65-85:75.0 1-17:60.0 701-715:46.0 684-705:43.0	427	3.23e-27	175	0.3863	80	0.4571	512879 No KEGG functional class	1	715	jgi|Piromy_p0_1|475545|gm4.16985_g	1	284	Piromyces sp. UH3-1 v2.0	Piromy_p0_1_GeneCatalog_proteins_20200513.aa
Piromy_p0_1|475519	167-212:125.0 759-812:79.0 355-400:73.0 418-458:72.0 542-570:66.0 1-20:47.0	462	1.34e-25	236	0.2379	87	0.3686	512879 No KEGG functional class	1	812	jgi|Piromy_p0_1|475519|gm4.16959_g	1	815	Piromyces sp. UH3-1 v2.0	Piromy_p0_1_GeneCatalog_proteins_20200513.aa
Piromy_p0_1|390750	167-212:125.0 271-345:87.0 759-812:79.0 355-400:73.0 418-458:72.0 542-570:66.0 1-20:47.0	549	1.97e-32	311	0.3502	106	0.3408	512879 No KEGG functional class	1	812	jgi|Piromy_p0_1|390750|fgenesh1_pg.chromosome_9_#_1775	1	838	Piromyces sp. UH3-1 v2.0	Piromy_p0_1_GeneCatalog_proteins_20200513.aa
PirE2_1|68493	16-82:120.0 168-203:87.0 681-716:82.0 1-15:55.0	344	4.42e-21	154	0.2889	66	0.4286	512879 No KEGG functional class	1	716	jgi|PirE2_1|68493|estExt_fgenesh1_pg.C_80013	1	359	Piromyces sp. E2 v1.0	PirE2_1_GeneCatalog_proteins_20110421.aa
Pecora1|14694	128-217:150.0 414-460:77.0 393-411:68.0 1-22:62.0 515-573:60.0 280-297:52.0 715-729:46.0 840-865:45.0	560	1.34e-29	296	0.3406	109	0.3682	512879 No KEGG functional class	1	865	jgi|Pecora1|14694|allA15382	1	746	Pecoramyces sp. F1	Pecora1_ExternalModels_proteins_2021-11-19.fasta
Orpsp1_1|1185106	140-209:159.0 245-298:117.0 515-556:94.0 411-452:75.0 317-351:73.0 654-697:72.0 364-398:68.0 560-573:64.0 707-723:48.0	770	2.77e-52	353	0.4222	138	0.3909	512879 No KEGG functional class	140	723	jgi|Orpsp1_1|1185106|evm.model.c7180000092330.1	200	748	Orpinomyces sp.	Orpsp1_1_GeneCatalog_proteins_20140826.aa
Neosp1|512879	1-475:2523.0 609-871:1398.0 493-591:457.0	4378	0	837	0.961	826	0.9869	512879 No KEGG functional class	1	871	jgi|Neosp1|512879|fgenesh1_pg.180_#_21	1	871	Neocallimastix californiae G1 v1.0	Neosp1_GeneCatalog_proteins_20170918.aa
Neolan1|560757	1-475:2403.0 609-861:1318.0 493-591:408.0	4129	0	827	0.9605	778	0.9407	512879 No KEGG functional class	1	861	jgi|Neolan1|560757|CE560756_1273	1	861	Neocallimastix lanati v1.0	Neolan1_GeneCatalog_proteins_20200610.aa
Caecom1|487596	669-763:356.0 233-309:288.0 609-668:180.0 500-556:158.0 816-856:143.0 198-234:124.0 164-196:113.0 426-452:95.0 759-794:92.0 367-405:84.0 463-475:53.0 560-573:51.0	1737	4.28e-165	529	0.5738	311	0.5879	512879 No KEGG functional class	164	856	jgi|Caecom1|487596|fgenesh1_pg.17_#_50	227	920	Caecomyces churrovis A v1.0	Caecom1_GeneCatalog_proteins_20171213.aa
NeoWI3_1|808606	139-597:1942.0 28-120:473.0	2415	0	552	0.8776	422	0.7645	513728 No KEGG functional class	28	597	jgi|NeoWI3_1|808606|estExt_fgenesh1_pg.C_270026	56	629	Neocallimastix sp. WI3-B v1.0	NeoWI3_1_GeneCatalog_proteins_20201119.aa
NeoWI3_1|568140	139-597:2274.0 1-120:581.0	2855	0	579	0.9698	514	0.8877	513728 No KEGG functional class	1	597	jgi|NeoWI3_1|568140|estExt_Genewise1Plus.C_7_t10039	1	597	Neocallimastix sp. WI3-B v1.0	NeoWI3_1_GeneCatalog_proteins_20201119.aa
NeoWI3_1|550635	139-597:1850.0 28-120:437.0	2287	0	552	0.9436	398	0.721	513728 No KEGG functional class	28	597	jgi|NeoWI3_1|550635|estExt_Genewise1.C_490424	19	584	Neocallimastix sp. WI3-B v1.0	NeoWI3_1_GeneCatalog_proteins_20201119.aa
NeoWI3_1|540675	139-597:1915.0 28-120:472.0	2387	0	552	0.9293	414	0.75	513728 No KEGG functional class	28	597	jgi|NeoWI3_1|540675|estExt_Genewise1.C_27_t10047	19	594	Neocallimastix sp. WI3-B v1.0	NeoWI3_1_GeneCatalog_proteins_20201119.aa
Neolan1|1718597	139-597:1859.0 28-120:453.0	2312	0	552	0.9436	401	0.7264	513728 No KEGG functional class	28	597	jgi|Neolan1|1718597|fgenesh2_kg.105___52___TRINITY_DN2122_c0_g2_i5	19	584	Neocallimastix lanati v1.0	Neolan1_GeneCatalog_proteins_20200610.aa
Neolan1|1428634	139-597:2329.0 1-120:610.0	2939	0	579	0.9698	537	0.9275	513728 No KEGG functional class	1	597	jgi|Neolan1|1428634|estExt_Genemark4.C_690156	1	597	Neocallimastix lanati v1.0	Neolan1_GeneCatalog_proteins_20200610.aa
Neolan1|101020	139-597:1921.0 28-120:473.0	2394	0	552	0.9293	414	0.75	513728 No KEGG functional class	28	597	jgi|Neolan1|101020|CE101019_3933	19	594	Neocallimastix lanati v1.0	Neolan1_GeneCatalog_proteins_20200610.aa
Neolan1|101009	139-597:1947.0 28-120:473.0	2420	0	552	0.9293	421	0.7627	513728 No KEGG functional class	28	597	jgi|Neolan1|101009|CE101008_2209	19	594	Neocallimastix lanati v1.0	Neolan1_GeneCatalog_proteins_20200610.aa
NeoGfMa1|654058	139-597:1915.0 28-120:472.0	2387	0	552	0.9293	414	0.75	513728 No KEGG functional class	28	597	jgi|NeoGfMa1|654058|MIX47673_63_18	19	594	Neocallimastix sp. Gf-Ma3-1 v1.0	NeoGfMa1_GeneCatalog_proteins_20201119.aa
NeoGfMa1|368699	139-597:2274.0 1-120:581.0	2855	0	579	0.9698	514	0.8877	513728 No KEGG functional class	1	597	jgi|NeoGfMa1|368699|estExt_Genewise1.C_26_t10043	1	597	Neocallimastix sp. Gf-Ma3-1 v1.0	NeoGfMa1_GeneCatalog_proteins_20201119.aa
NeoWI3_1|565716	4-152:590.0 152-183:145.0	735	1.3e-87	181	0.9837	134	0.7403	514058 No KEGG functional class	4	183	jgi|NeoWI3_1|565716|estExt_Genewise1Plus.C_5_t10229	3	183	Neocallimastix sp. WI3-B v1.0	NeoWI3_1_GeneCatalog_proteins_20201119.aa
NeoWI3_1|565693	1-184:915.0	915	8.5e-118	184	1	173	0.9402	514058 No KEGG functional class	1	184	jgi|NeoWI3_1|565693|estExt_Genewise1Plus.C_5_t10199	1	184	Neocallimastix sp. WI3-B v1.0	NeoWI3_1_GeneCatalog_proteins_20201119.aa
Neosp1|699332	17-152:580.0 152-183:140.0 1-18:58.0	778	8.02e-89	186	1.0164	143	0.7688	514058 No KEGG functional class	1	183	jgi|Neosp1|699332|fgenesh2_kg.29_#_76_#_Locus7818v1rpkm5.08	1	182	Neocallimastix californiae G1 v1.0	Neosp1_GeneCatalog_proteins_20170918.aa
Neosp1|514058	1-184:962.0	962	2e-124	184	1	184	1	514058 No KEGG functional class	1	184	jgi|Neosp1|514058|fgenesh1_pg.208_#_43	1	184	Neocallimastix californiae G1 v1.0	Neosp1_GeneCatalog_proteins_20170918.aa
Neosp1|153645	17-152:580.0 152-183:140.0 1-18:58.0	778	8.02e-89	186	1.0164	143	0.7688	514058 No KEGG functional class	1	183	jgi|Neosp1|153645|CE153644_248	1	182	Neocallimastix californiae G1 v1.0	Neosp1_GeneCatalog_proteins_20170918.aa
Neolan1|1629563	17-152:580.0 152-183:140.0 1-18:58.0	778	1.09e-88	186	1.0164	143	0.7688	514058 No KEGG functional class	1	183	jgi|Neolan1|1629563|fgenesh2_kg.7___206___TRINITY_DN8939_c0_g1_i1	1	182	Neocallimastix lanati v1.0	Neolan1_GeneCatalog_proteins_20200610.aa
Neolan1|1629493	1-184:962.0	962	2.71e-124	184	1	184	1	514058 No KEGG functional class	1	184	jgi|Neolan1|1629493|fgenesh2_kg.7___136___TRINITY_DN8939_c0_g2_i1	1	184	Neocallimastix lanati v1.0	Neolan1_GeneCatalog_proteins_20200610.aa
Neolan1|538121	17-152:576.0 154-183:138.0 1-18:58.0	772	7.16e-88	184	1.0055	141	0.7663	514058 No KEGG functional class	1	183	jgi|Neolan1|538121|CE538120_463	1	182	Neocallimastix lanati v1.0	Neolan1_GeneCatalog_proteins_20200610.aa
NeoGfMa1|592146	4-152:594.0 152-183:145.0	739	3.68e-88	181	0.9837	135	0.7459	514058 No KEGG functional class	4	183	jgi|NeoGfMa1|592146|estExt_fgenesh1_pg.C_690026	3	183	Neocallimastix sp. Gf-Ma3-1 v1.0	NeoGfMa1_GeneCatalog_proteins_20201119.aa
NeoGfMa1|417937	1-184:915.0	915	8.52e-118	184	1	173	0.9402	514058 No KEGG functional class	1	184	jgi|NeoGfMa1|417937|estExt_Genewise1Plus.C_690025	1	184	Neocallimastix sp. Gf-Ma3-1 v1.0	NeoGfMa1_GeneCatalog_proteins_20201119.aa
Piromy_p0_1|331906	21-301:988.0 337-434:358.0 449-500:205.0 515-581:149.0	1700	0	498	0.8058	314	0.6305	514399 No KEGG functional class	21	581	jgi|Piromy_p0_1|331906|estExt_Genewise1.C_chromosome_10_t10381	25	584	Piromyces sp. UH3-1 v2.0	Piromy_p0_1_GeneCatalog_proteins_20200513.aa
Piromy_p0_1|300726	339-512:562.0 163-301:523.0 48-169:324.0 536-579:118.0 516-534:55.0 311-331:48.0	1630	0	519	0.9202	297	0.5723	514399 No KEGG functional class	48	579	jgi|Piromy_p0_1|300726|e_gw1.10.603.1	1	530	Piromyces sp. UH3-1 v2.0	Piromy_p0_1_GeneCatalog_proteins_20200513.aa
Pecora1|8029	69-301:836.0 339-433:373.0 441-500:231.0 536-579:137.0 311-331:68.0 516-533:52.0 1-96:310.0	2007	0	567	0.9878	364	0.642	514399 No KEGG functional class	1	579	jgi|Pecora1|8029|allA08186	1	572	Pecoramyces sp. F1	Pecora1_ExternalModels_proteins_2021-11-19.fasta
Pecora1|4073	48-336:1252.0 341-515:811.0 516-578:218.0	2281	0	527	0.9777	417	0.7913	514399 No KEGG functional class	48	578	jgi|Pecora1|4073|allA04097	1	533	Pecoramyces sp. F1	Pecora1_ExternalModels_proteins_2021-11-19.fasta
Pecora1|2688	207-506:1159.0 87-204:410.0 8-82:278.0 532-580:152.0	1999	0	542	0.9186	362	0.6679	514399 No KEGG functional class	8	580	jgi|Pecora1|2688|allA02680	9	583	Pecoramyces sp. F1	Pecora1_ExternalModels_proteins_2021-11-19.fasta
Pecora1|2687	85-304:816.0 334-525:626.0 8-85:302.0 311-333:82.0 516-579:137.0	1963	0	577	0.9382	344	0.5962	514399 No KEGG functional class	8	579	jgi|Pecora1|2687|allA02679	9	579	Pecoramyces sp. F1	Pecora1_ExternalModels_proteins_2021-11-19.fasta
Neolan1|1646030	86-304:854.0 337-525:636.0 2-82:291.0 311-331:74.0 515-576:145.0	2000	0	572	0.9316	359	0.6276	514399 No KEGG functional class	2	576	jgi|Neolan1|1646030|fgenesh2_kg.17___400___TRINITY_DN153_c7_g1_i1	3	576	Neocallimastix lanati v1.0	Neolan1_GeneCatalog_proteins_20200610.aa
Neolan1|1280564	1-581:3071.0	3071	0	581	1	581	1	514399 No KEGG functional class	1	581	jgi|Neolan1|1280564|fgenesh1_pm.109_#_58	1	581	Neocallimastix lanati v1.0	Neolan1_GeneCatalog_proteins_20200610.aa
Neolan1|1055664	87-301:820.0 339-430:385.0 2-85:268.0 441-525:229.0 536-579:135.0 311-331:65.0	1902	0	541	0.9442	343	0.634	514399 No KEGG functional class	2	579	jgi|Neolan1|1055664|estExt_Genewise1Plus.C_1090188	3	573	Neocallimastix lanati v1.0	Neolan1_GeneCatalog_proteins_20200610.aa
Neolan1|1055657	1-506:1912.0 506-579:177.0	2089	0	580	0.9797	377	0.65	514399 No KEGG functional class	1	579	jgi|Neolan1|1055657|estExt_Genewise1Plus.C_1090181	1	581	Neocallimastix lanati v1.0	Neolan1_GeneCatalog_proteins_20200610.aa
Piromy_p0_1|431667	64-138:296.0 4-72:191.0	487	2.66e-53	144	1.0213	97	0.6736	514973 No KEGG functional class	4	138	jgi|Piromy_p0_1|431667|fgenesh1_pm.chromosome_5_#_643	5	141	Piromyces sp. UH3-1 v2.0	Piromy_p0_1_GeneCatalog_proteins_20200513.aa
Pirfi3|283247	61-138:299.0 4-67:186.0	485	3.17e-53	142	1.0071	98	0.6901	514973 No KEGG functional class	4	138	jgi|Pirfi3|283247|e_gw1.11.720.1	5	141	Piromyces finnis v3.0	Pirfi3_GeneCatalog_proteins_20160330.aa
PirE2_1|8501	61-138:299.0 4-72:194.0	493	3.2e-33	147	1.0426	99	0.6735	514973 No KEGG functional class	4	138	jgi|PirE2_1|8501|gm1.7447_g	5	141	Piromyces sp. E2 v1.0	PirE2_1_GeneCatalog_proteins_20110421.aa
Pecora1|12588	3-138:353.0 61-119:195.0	548	2.23e-40	195	1.3929	115	0.5897	514973 No KEGG functional class	3	138	jgi|Pecora1|12588|allA13153	4	139	Pecoramyces sp. F1	Pecora1_ExternalModels_proteins_2021-11-19.fasta
NeoWI3_1|608618	1-67:326.0 66-118:222.0 80-138:128.0	676	2.23e-61	179	1.3259	138	0.7709	514973 No KEGG functional class	1	138	jgi|NeoWI3_1|608618|fgenesh1_pg.6_#_579	1	135	Neocallimastix sp. WI3-B v1.0	NeoWI3_1_GeneCatalog_proteins_20201119.aa
Neosp1|514973	1-138:690.0	690	4.6e-86	138	1	138	1	514973 No KEGG functional class	1	138	jgi|Neosp1|514973|fgenesh1_pg.232_#_22	1	138	Neocallimastix californiae G1 v1.0	Neosp1_GeneCatalog_proteins_20170918.aa
Neolan1|1039750	1-138:690.0	690	6.17e-86	138	1	138	1	514973 No KEGG functional class	1	138	jgi|Neolan1|1039750|estExt_Genewise1Plus.C_390148	1	138	Neocallimastix lanati v1.0	Neolan1_GeneCatalog_proteins_20200610.aa
NeoGfMa1|704907	1-67:326.0 66-118:222.0 80-138:128.0	676	2.26e-61	179	1.3259	138	0.7709	514973 No KEGG functional class	1	138	jgi|NeoGfMa1|704907|fgenesh2_kg.6___269___TRINITY_DN2246_c0_g1_i1	1	135	Neocallimastix sp. Gf-Ma3-1 v1.0	NeoGfMa1_GeneCatalog_proteins_20201119.aa
Caecom1|522088	3-138:366.0	366	3.47e-42	136	0.9784	73	0.5368	514973 No KEGG functional class	3	138	jgi|Caecom1|522088|estExt_fgenesh1_pg.C_140005	4	139	Caecomyces churrovis A v1.0	Caecom1_GeneCatalog_proteins_20171213.aa
Anasp1|293113	5-64:199.0 63-119:195.0 60-138:158.0 41-67:61.0	613	6.63e-41	223	1.5594	127	0.5695	514973 No KEGG functional class	5	138	jgi|Anasp1|293113|estExt_Genemark1.C_1120020	6	143	Anaeromyces robustus v1.0	Anasp1_GeneCatalog_proteins_20160330.aa
PirE2_1|61132	107-368:1189.0	1189	3.25e-155	262	1	221	0.8435	515922 No KEGG functional class	107	368	jgi|PirE2_1|61132|fgenesh1_pg.138_#_14	1	262	Piromyces sp. E2 v1.0	PirE2_1_GeneCatalog_proteins_20110421.aa
NeoWI3_1|851795	99-366:1208.0 1-38:141.0 37-65:108.0 65-73:43.0	1500	2.27e-179	344	0.8753	269	0.782	515922 No KEGG functional class	1	366	jgi|NeoWI3_1|851795|MIX34904_312_4	1	391	Neocallimastix sp. WI3-B v1.0	NeoWI3_1_GeneCatalog_proteins_20201119.aa
NeoWI3_1|832917	100-370:1351.0 1-65:324.0 65-73:45.0 30-61:98.0 99-135:43.0	1861	0	414	1.0172	335	0.8092	515922 No KEGG functional class	1	370	jgi|NeoWI3_1|832917|MIX16026_6_23	1	407	Neocallimastix sp. WI3-B v1.0	NeoWI3_1_GeneCatalog_proteins_20201119.aa
NeoWI3_1|569066	22-76:193.0 33-63:102.0 12-33:70.0	365	3.7e-18	108	0.1993	56	0.5185	515922 No KEGG functional class	12	76	jgi|NeoWI3_1|569066|estExt_Genewise1Plus.C_7_t30164	67	152	Neocallimastix sp. WI3-B v1.0	NeoWI3_1_GeneCatalog_proteins_20201119.aa
Neosp1|515922	98-370:1444.0 1-80:459.0	1903	0	353	0.9541	353	1	515922 No KEGG functional class	1	370	jgi|Neosp1|515922|fgenesh1_pg.260_#_3	1	370	Neocallimastix californiae G1 v1.0	Neosp1_GeneCatalog_proteins_20170918.aa
Neolan1|1274947	98-370:1444.0 1-80:459.0	1903	0	353	0.9541	353	1	515922 No KEGG functional class	1	370	jgi|Neolan1|1274947|fgenesh1_pm.41_#_109	1	370	Neocallimastix lanati v1.0	Neolan1_GeneCatalog_proteins_20200610.aa
NeoGfMa1|643918	100-370:1346.0 1-65:324.0 65-73:45.0	1715	0	345	0.8477	313	0.9072	515922 No KEGG functional class	1	370	jgi|NeoGfMa1|643918|MIX37533_4_34	1	407	Neocallimastix sp. Gf-Ma3-1 v1.0	NeoGfMa1_GeneCatalog_proteins_20201119.aa
NeoGfMa1|640088	99-366:1208.0 1-38:141.0 37-65:108.0 65-73:43.0	1500	2.3e-179	344	0.8753	269	0.782	515922 No KEGG functional class	1	366	jgi|NeoGfMa1|640088|MIX33703_184_4	1	391	Neocallimastix sp. Gf-Ma3-1 v1.0	NeoGfMa1_GeneCatalog_proteins_20201119.aa
NeoGfMa1|360946	22-76:193.0 33-63:102.0 12-33:70.0	365	3.74e-18	108	0.1993	56	0.5185	515922 No KEGG functional class	12	76	jgi|NeoGfMa1|360946|estExt_Genewise1.C_12_t10269	67	152	Neocallimastix sp. Gf-Ma3-1 v1.0	NeoGfMa1_GeneCatalog_proteins_20201119.aa
Caecom1|451959	100-370:1270.0 1-67:325.0 66-73:48.0	1643	0	346	0.8543	299	0.8642	515922 No KEGG functional class	1	370	jgi|Caecom1|451959|fgenesh1_kg.103_#_34_#_TRINITY_DN6726_c1_g1_i1	1	405	Caecomyces churrovis A v1.0	Caecom1_GeneCatalog_proteins_20171213.aa
Pecora1|14171	924-1112:682.0 1165-1309:428.0 1312-1365:132.0 865-905:123.0 557-599:114.0 642-695:99.0 1130-1162:92.0 827-847:76.0 731-769:72.0 445-476:70.0 228-268:69.0 479-505:62.0 170-184:53.0 307-339:53.0 703-726:51.0 143-163:50.0 775-797:49.0 196-222:47.0 645-686:84.0 1163-1190:78.0 180-208:74.0 316-357:74.0 1067-1102:71.0 554-575:55.0 138-155:51.0 1018-1068:51.0 621-657:82.0 249-332:67.0 493-518:62.0 1144…	3293	0	1385	0.4376	598	0.4318	516526 No KEGG functional class	138	1365	jgi|Pecora1|14171|allA14827	575	3161	Pecoramyces sp. F1	Pecora1_ExternalModels_proteins_2021-11-19.fasta
Pecora1|13047	1165-1359:583.0 1009-1162:449.0 924-1017:392.0 865-905:124.0 642-695:107.0 479-517:98.0 825-847:98.0 176-208:75.0 445-476:71.0 731-759:62.0 554-575:55.0 701-726:51.0 775-797:48.0 645-686:85.0 1161-1190:75.0 1067-1102:66.0 230-260:59.0 319-333:51.0	2549	0	919	0.6941	444	0.4831	516526 No KEGG functional class	176	1359	jgi|Pecora1|13047|allA13532	303	1314	Pecoramyces sp. F1	Pecora1_ExternalModels_proteins_2021-11-19.fasta
Pecora1|13046	924-1115:680.0 1165-1365:573.0 865-905:124.0 642-695:107.0 557-596:106.0 1126-1162:106.0 479-517:98.0 825-847:98.0 176-208:75.0 445-476:71.0 701-726:51.0 775-797:48.0 621-657:87.0 1161-1190:75.0 1067-1102:66.0 705-726:57.0 493-555:53.0 304-336:52.0 1096-1139:46.0 676-698:44.0 316-357:75.0 645-668:63.0 1145-1166:57.0 554-575:55.0 926-956:53.0 230-260:59.0 176-195:56.0 252-313:55.0	3090	0	1283	1.1781	550	0.4287	516526 No KEGG functional class	176	1365	jgi|Pecora1|13046|allA13531	37	1084	Pecoramyces sp. F1	Pecora1_ExternalModels_proteins_2021-11-19.fasta
Pecora1|12882	1165-1365:617.0 1008-1162:471.0 924-999:319.0 865-905:125.0 619-695:112.0 479-518:102.0 825-847:98.0 445-476:74.0 519-582:61.0 731-755:59.0 701-726:51.0 775-797:48.0 557-599:94.0 645-686:84.0 1161-1190:75.0 157-189:71.0 521-558:66.0 1067-1102:64.0 239-289:62.0 1018-1068:58.0 327-345:50.0 1096-1139:47.0 621-657:82.0 241-269:63.0 306-338:61.0 705-726:58.0 1144-1166:58.0 926-956:57.0 529-575:51.0 18…	3495	0	1522	0.4454	631	0.4146	516526 No KEGG functional class	157	1365	jgi|Pecora1|12882|allA13350	450	3414	Pecoramyces sp. F1	Pecora1_ExternalModels_proteins_2021-11-19.fasta
Pecora1|12361	1165-1365:600.0 998-1162:502.0 924-996:312.0 557-596:106.0 642-695:102.0 479-517:98.0 825-847:98.0 865-898:86.0 176-208:75.0 445-476:71.0 731-755:59.0 701-726:51.0 775-797:48.0 621-657:87.0 1161-1190:75.0 1067-1102:69.0 705-726:57.0 493-555:53.0 304-336:52.0 1096-1139:46.0 645-686:85.0 316-357:75.0 926-956:60.0 1145-1166:57.0	2924	0	1170	1.0588	520	0.4444	516526 No KEGG functional class	176	1365	jgi|Pecora1|12361|allA12793	37	1102	Pecoramyces sp. F1	Pecora1_ExternalModels_proteins_2021-11-19.fasta
Pecora1|10173	1064-1311:660.0 965-1062:249.0 268-375:174.0 925-968:129.0 700-751:124.0 1311-1346:120.0 865-904:102.0 625-670:101.0 825-845:93.0 478-518:89.0 572-591:83.0 138-169:76.0 774-797:68.0 445-471:62.0 414-438:50.0 554-597:88.0 1021-1068:68.0 1133-1167:68.0 529-555:61.0 204-245:60.0 316-337:57.0 635-656:53.0 249-269:48.0 553-584:74.0 705-741:62.0 629-674:59.0 1047-1102:56.0 232-259:55.0 514-553:51.0 116…	4128	0	1995	1.3674	761	0.3815	516526 No KEGG functional class	138	1346	jgi|Pecora1|10173|allA10442	64	1433	Pecoramyces sp. F1	Pecora1_ExternalModels_proteins_2021-11-19.fasta
Pecora1|5719	924-1164:739.0 1165-1267:299.0 1316-1368:142.0 865-905:133.0 1263-1311:128.0 622-683:125.0 702-748:119.0 825-846:93.0 559-591:90.0 479-517:89.0 314-341:75.0 440-471:73.0 772-797:69.0 231-256:62.0 168-217:58.0 342-378:52.0 625-673:94.0 1068-1102:66.0 705-726:65.0 231-267:61.0 559-590:60.0 200-227:57.0 1166-1184:54.0 553-591:70.0 643-668:64.0 527-551:58.0 201-225:56.0 229-244:56.0 877-904:54.0 1146…	3777	0	1602	1.1386	682	0.4257	516526 No KEGG functional class	168	1368	jgi|Pecora1|5719|allA05809	23	1406	Pecoramyces sp. F1	Pecora1_ExternalModels_proteins_2021-11-19.fasta
Pecora1|5401	924-1162:826.0 1165-1326:495.0 865-905:123.0 557-598:111.0 642-687:101.0 479-518:99.0 825-847:98.0 445-476:70.0 274-338:68.0 731-759:62.0 229-268:60.0 164-185:53.0 126-144:49.0 775-797:49.0 621-657:85.0 1161-1190:76.0 180-208:74.0 1067-1102:71.0 705-726:57.0 138-155:51.0 1018-1068:51.0 626-649:60.0 1144-1166:58.0 258-288:56.0 665-683:56.0 926-956:53.0 319-345:51.0 399-433:50.0 701-716:47.0	3160	0	1252	0.4549	566	0.4521	516526 No KEGG functional class	126	1326	jgi|Pecora1|5401|allA05512	110	2751	Pecoramyces sp. F1	Pecora1_ExternalModels_proteins_2021-11-19.fasta
Pecora1|3229	924-1162:817.0 1165-1338:561.0 865-905:124.0 642-695:105.0 557-599:102.0 479-518:99.0 825-847:98.0 445-476:70.0 233-256:65.0 731-759:62.0 303-343:61.0 194-215:53.0 175-196:52.0 701-726:51.0 775-797:49.0 645-686:85.0 1161-1190:78.0 1067-1102:71.0 519-582:67.0 233-256:65.0 316-338:55.0 1018-1068:52.0 268-320:50.0 621-657:88.0 1144-1166:58.0 705-726:57.0 245-273:54.0 536-564:53.0 307-340:52.0 926-95…	3357	0	1393	0.3779	606	0.435	516526 No KEGG functional class	120	1338	jgi|Pecora1|3229|allA03232	62	3684	Pecoramyces sp. F1	Pecora1_ExternalModels_proteins_2021-11-19.fasta
Pecora1|152	1067-1367:883.0 924-1066:485.0 626-695:140.0 865-906:125.0 476-518:107.0 557-591:98.0 825-847:91.0 755-797:78.0 433-462:76.0 287-337:72.0 203-238:70.0 138-169:56.0 731-754:56.0 701-726:48.0 625-691:121.0 557-590:89.0 1067-1102:74.0 1025-1068:60.0 1156-1184:57.0 170-211:56.0 316-337:56.0 684-726:48.0 546-590:105.0 646-686:94.0 230-256:64.0 138-168:55.0 1130-1169:51.0 1091-1123:50.0 1072-1092:47.0 …	4136	0	1938	1.4303	778	0.4014	516526 No KEGG functional class	138	1367	jgi|Pecora1|152|allA00070	101	1354	Pecoramyces sp. F1	Pecora1_ExternalModels_proteins_2021-11-19.fasta
Piromy_p0_1|282033	1-214:1132.0 218-286:280.0 327-345:48.0	1460	0	302	0.6439	263	0.8709	517403 No KEGG functional class	1	345	jgi|Piromy_p0_1|282033|e_gw1.4.2060.1	1	319	Piromyces sp. UH3-1 v2.0	Piromy_p0_1_GeneCatalog_proteins_20200513.aa
Pirfi3|174203	1-214:1120.0 218-286:271.0 311-339:111.0 301-312:59.0 336-352:46.0	1607	0	341	0.7949	286	0.8387	517403 No KEGG functional class	1	352	jgi|Pirfi3|174203|CE174202_18921	1	350	Piromyces finnis v3.0	Pirfi3_GeneCatalog_proteins_20160330.aa
PirE2_1|58991	1-214:1110.0 218-286:285.0	1395	1.43e-178	283	0.6008	251	0.8869	517403 No KEGG functional class	1	286	jgi|PirE2_1|58991|fgenesh1_pg.50_#_26	1	284	Piromyces sp. E2 v1.0	PirE2_1_GeneCatalog_proteins_20110421.aa
Pecora1|12323	1-286:1441.0 300-344:208.0 341-354:61.0	1710	0	345	0.8061	303	0.8783	517403 No KEGG functional class	1	354	jgi|Pecora1|12323|allA12882	1	356	Pecoramyces sp. F1	Pecora1_ExternalModels_proteins_2021-11-19.fasta
Orpsp1_1|1183991	1-286:1447.0 300-344:208.0 341-354:61.0	1716	0	345	0.8234	304	0.8812	517403 No KEGG functional class	1	354	jgi|Orpsp1_1|1183991|evm.model.c7180000087537.1	1	356	Orpinomyces sp.	Orpsp1_1_GeneCatalog_proteins_20140826.aa
NeoWI3_1|496816	1-343:1714.0 339-354:57.0	1771	0	359	1.0141	322	0.8969	517403 No KEGG functional class	1	354	jgi|NeoWI3_1|496816|e_gw1.37.546.1	1	353	Neocallimastix sp. WI3-B v1.0	NeoWI3_1_GeneCatalog_proteins_20201119.aa
Neosp1|517403	1-355:1798.0	1798	0	355	1	328	0.9239	517403 No KEGG functional class	1	355	jgi|Neosp1|517403|fgenesh1_pg.319_#_2	1	355	Neocallimastix californiae G1 v1.0	Neosp1_GeneCatalog_proteins_20170918.aa
Neolan1|940921	1-355:1798.0	1798	0	355	1	328	0.9239	517403 No KEGG functional class	1	355	jgi|Neolan1|940921|e_gw1.43.110.1	1	355	Neocallimastix lanati v1.0	Neolan1_GeneCatalog_proteins_20200610.aa
NeoGfMa1|574122	1-343:1714.0 339-352:52.0	1766	0	357	0.8302	321	0.8992	517403 No KEGG functional class	1	352	jgi|NeoGfMa1|574122|estExt_Genemark4.C_490053	1	351	Neocallimastix sp. Gf-Ma3-1 v1.0	NeoGfMa1_GeneCatalog_proteins_20201119.aa
Anasp1|294235	13-214:1060.0 218-286:285.0 301-343:166.0 1-15:49.0	1560	0	329	0.7633	278	0.845	517403 No KEGG functional class	1	343	jgi|Anasp1|294235|estExt_Genemark1.C_1640022	1	336	Anaeromyces robustus v1.0	Anasp1_GeneCatalog_proteins_20160330.aa
Piromy_p0_1|318494	233-501:1258.0 154-230:271.0 33-60:107.0 82-107:100.0	1736	0	400	0.8457	297	0.7425	518456 No KEGG functional class	33	501	jgi|Piromy_p0_1|318494|estExt_Genewise1.C_chromosome_4_t80166	30	473	Piromyces sp. UH3-1 v2.0	Piromy_p0_1_GeneCatalog_proteins_20200513.aa
Piromy_p0_1|284648	137-508:1973.0 1-113:367.0 18-58:141.0 71-107:135.0	2616	0	563	1.1061	444	0.7886	518456 No KEGG functional class	1	508	jgi|Piromy_p0_1|284648|e_gw1.5.2020.1	1	506	Piromyces sp. UH3-1 v2.0	Piromy_p0_1_GeneCatalog_proteins_20200513.aa
Pecora1|14068	346-501:732.0 255-342:409.0 161-230:271.0 79-107:111.0 43-61:84.0 23-33:55.0 30-61:102.0	1764	0	405	0.871	293	0.7235	518456 No KEGG functional class	23	501	jgi|Pecora1|14068|allA14702	21	464	Pecoramyces sp. F1	Pecora1_ExternalModels_proteins_2021-11-19.fasta
Pecora1|14067	346-501:746.0 233-342:508.0 154-230:282.0 79-107:119.0 33-67:116.0 22-33:59.0 82-109:105.0 68-82:57.0 30-65:124.0	2116	0	498	1.0573	352	0.7068	518456 No KEGG functional class	22	501	jgi|Pecora1|14067|allA14701	17	470	Pecoramyces sp. F1	Pecora1_ExternalModels_proteins_2021-11-19.fasta
Pecora1|14066	229-500:1246.0 187-230:141.0 79-107:117.0 33-67:108.0 161-176:80.0 22-33:59.0 82-109:113.0 68-82:57.0 30-74:118.0	2039	0	496	1.0377	339	0.6835	518456 No KEGG functional class	22	500	jgi|Pecora1|14066|allA14700	17	476	Pecoramyces sp. F1	Pecora1_ExternalModels_proteins_2021-11-19.fasta
Pecora1|1083	135-507:2032.0 1-71:282.0 65-115:247.0 22-60:170.0 71-109:152.0	2883	0	573	1.1235	485	0.8464	518456 No KEGG functional class	1	507	jgi|Pecora1|1083|allA01041	1	509	Pecoramyces sp. F1	Pecora1_ExternalModels_proteins_2021-11-19.fasta
Neolan1|1056544	233-501:1261.0 161-230:262.0 33-113:232.0 23-33:55.0 82-109:107.0 72-82:49.0 30-61:121.0	2087	0	502	1.0502	350	0.6972	518456 No KEGG functional class	23	501	jgi|Neolan1|1056544|estExt_Genewise1Plus.C_1150040	21	478	Neocallimastix lanati v1.0	Neolan1_GeneCatalog_proteins_20200610.aa
Neolan1|1041221	233-501:1270.0 161-230:266.0 79-107:141.0 33-61:117.0 22-33:58.0 82-109:113.0 68-82:55.0 30-65:123.0	2143	0	488	1.0339	353	0.7234	518456 No KEGG functional class	22	501	jgi|Neolan1|1041221|estExt_Genewise1Plus.C_430256	17	472	Neocallimastix lanati v1.0	Neolan1_GeneCatalog_proteins_20200610.aa
Neolan1|990773	135-507:2051.0 1-115:507.0 17-60:161.0 71-107:150.0	2869	0	569	1.1245	486	0.8541	518456 No KEGG functional class	1	507	jgi|Neolan1|990773|estExt_Genewise1.C_370215	1	506	Neocallimastix lanati v1.0	Neolan1_GeneCatalog_proteins_20200610.aa
Neolan1|986760	135-508:2133.0 1-115:605.0 71-109:157.0 22-60:157.0	3052	0	567	1.1161	527	0.9295	518456 No KEGG functional class	1	508	jgi|Neolan1|986760|estExt_Genewise1.C_270029	1	508	Neocallimastix lanati v1.0	Neolan1_GeneCatalog_proteins_20200610.aa
NeoWI3_1|843379	291-511:983.0 740-869:554.0 71-212:525.0 505-622:498.0 622-739:405.0 250-286:162.0 213-251:157.0 923-963:147.0 874-909:94.0 799-877:261.0 1107-1183:214.0 608-655:193.0 513-559:177.0 1021-1051:125.0 667-710:116.0 932-969:116.0 771-803:107.0 1000-1027:65.0 1059-1074:60.0 339-406:204.0 30-91:167.0 213-256:111.0 309-335:99.0 126-182:76.0 469-500:75.0 408-427:59.0 430-456:58.0 112-126:54.0 1060-1133:2…	6808	0	2068	1.7451	1311	0.6339	627810 No KEGG functional class	30	1191	jgi|NeoWI3_1|843379|MIX26488_2_6	21	958	Neocallimastix sp. WI3-B v1.0	NeoWI3_1_GeneCatalog_proteins_20201119.aa
Neosp1|627810	1-1430:7250.0 800-877:243.0 1059-1111:213.0 608-663:189.0 513-559:177.0 1018-1051:134.0 771-803:113.0 939-970:110.0 565-604:96.0 676-710:92.0 998-1017:67.0 337-423:275.0 607-659:213.0 112-167:134.0 563-596:134.0 32-78:127.0 309-341:113.0 471-502:110.0 79-118:96.0 213-247:92.0 538-557:67.0 1060-1136:247.0 1000-1051:131.0 1148-1187:104.0 112-188:193.0 61-110:129.0 213-252:104.0 1107-1187:192.0 635-…	11445	0	2847	1.9909	2191	0.7696	627810 No KEGG functional class	1	1430	jgi|Neosp1|627810|MIX8951_17_37	1	1430	Neocallimastix californiae G1 v1.0	Neosp1_GeneCatalog_proteins_20170918.aa
Neosp1|512814	307-392:249.0 799-872:247.0 607-655:229.0 26-108:218.0 508-559:152.0 770-796:134.0 467-500:129.0 939-972:106.0 428-459:103.0 736-759:83.0 123-182:77.0 111-126:73.0 579-595:72.0 213-229:62.0 403-427:61.0 275-301:51.0 1039-1083:47.0 1055-1187:412.0 619-689:268.0 513-559:175.0 808-854:154.0 771-797:128.0 565-594:111.0 939-972:110.0 739-769:97.0 1028-1050:69.0 608-622:68.0 694-714:66.0 1000-1018:61.0…	5967	0	1959	1.5966	1131	0.5773	627810 No KEGG functional class	26	1190	jgi|Neosp1|512814|fgenesh1_pg.178_#_23	26	1165	Neocallimastix californiae G1 v1.0	Neosp1_GeneCatalog_proteins_20170918.aa
Neolan1|1438009	971-1217:1011.0 310-499:609.0 739-872:500.0 622-726:352.0 26-108:216.0 511-559:168.0 126-206:167.0 558-596:148.0 213-251:126.0 940-965:107.0 605-622:74.0 269-290:69.0 111-126:66.0 250-266:46.0 898-908:44.0 799-877:213.0 1107-1184:203.0 1015-1074:181.0 513-559:166.0 622-677:144.0 565-594:111.0 772-797:93.0 940-974:84.0 608-622:61.0 1000-1018:58.0 337-408:221.0 635-715:187.0 412-459:156.0 32-78:108…	7999	0	2608	1.8562	1546	0.5928	627810 No KEGG functional class	26	1217	jgi|Neolan1|1438009|estExt_Genemark4.C_3190003	26	1196	Neocallimastix lanati v1.0	Neolan1_GeneCatalog_proteins_20200610.aa
Neolan1|1429167	971-1217:1011.0 310-499:609.0 739-872:500.0 633-726:296.0 511-559:168.0 558-596:148.0 940-965:107.0 605-622:74.0 269-290:69.0 249-266:48.0 898-908:44.0 337-408:221.0 635-715:187.0 412-459:156.0 32-78:108.0 563-596:104.0 309-336:102.0 214-247:99.0 74-116:97.0 472-497:89.0 154-196:63.0 538-557:60.0 112-126:56.0 799-877:213.0 1107-1184:203.0 1015-1074:181.0 772-797:93.0 940-974:84.0 1000-1018:58.0 1…	5827	0	1854	1.6038	1106	0.5965	627810 No KEGG functional class	32	1217	jgi|Neolan1|1429167|estExt_Genemark4.C_740212	1	947	Neocallimastix lanati v1.0	Neolan1_GeneCatalog_proteins_20200610.aa
Neolan1|1425538	971-1217:1011.0 309-499:629.0 727-872:504.0 620-726:367.0 26-108:223.0 123-206:173.0 511-559:162.0 558-596:148.0 213-251:137.0 940-965:102.0 273-291:74.0 605-622:74.0 111-126:69.0 250-266:46.0 898-908:44.0 799-877:217.0 1107-1187:202.0 1015-1074:181.0 513-559:166.0 619-655:140.0 668-716:136.0 565-594:113.0 771-797:106.0 940-974:84.0 608-622:64.0 1000-1018:58.0 337-408:221.0 635-715:191.0 412-459:…	8130	0	2656	1.7982	1562	0.5881	627810 No KEGG functional class	26	1267	jgi|Neolan1|1425538|estExt_Genemark4.C_450037	26	1196	Neocallimastix lanati v1.0	Neolan1_GeneCatalog_proteins_20200610.aa
Neolan1|1383280	971-1217:1015.0 309-499:621.0 761-872:416.0 622-715:319.0 26-108:212.0 123-206:173.0 558-596:147.0 213-251:137.0 940-965:107.0 605-622:74.0 111-126:69.0 273-290:68.0 250-266:46.0 800-877:217.0 1107-1184:203.0 1015-1074:184.0 513-559:155.0 619-655:140.0 668-716:136.0 565-594:113.0 771-798:109.0 940-974:85.0 608-622:64.0 1000-1018:58.0 337-408:221.0 635-715:191.0 412-459:156.0 32-78:108.0 563-596:1…	7889	0	2581	1.8609	1526	0.5912	627810 No KEGG functional class	26	1275	jgi|Neolan1|1383280|MIX18155_9_13	26	1148	Neocallimastix lanati v1.0	Neolan1_GeneCatalog_proteins_20200610.aa
Neolan1|1351700	307-392:249.0 799-872:247.0 635-726:229.0 26-108:218.0 770-796:134.0 467-500:129.0 505-559:129.0 939-972:105.0 428-459:103.0 736-759:86.0 123-182:77.0 111-126:73.0 579-595:72.0 213-229:62.0 403-427:61.0 275-301:53.0 558-579:50.0 1039-1083:47.0 1059-1187:407.0 619-689:268.0 513-559:175.0 808-854:154.0 771-797:128.0 565-594:111.0 939-972:110.0 739-769:98.0 1028-1050:69.0 608-622:68.0 694-714:66.0 1…	5928	0	1940	1.6316	1128	0.5814	627810 No KEGG functional class	26	1190	jgi|Neolan1|1351700|gm4.31310_g	23	1127	Neocallimastix lanati v1.0	Neolan1_GeneCatalog_proteins_20200610.aa
Neolan1|1312175	511-1430:4713.0 1-511:2538.0 800-877:243.0 1059-1111:213.0 608-663:189.0 513-559:177.0 1018-1051:134.0 771-803:113.0 939-970:110.0 565-604:96.0 676-710:92.0 998-1017:67.0 337-423:275.0 607-659:213.0 112-167:134.0 563-596:134.0 32-78:127.0 309-341:113.0 471-502:110.0 79-118:96.0 213-247:92.0 538-557:67.0 1060-1136:247.0 1000-1051:131.0 1148-1187:104.0 112-188:193.0 61-110:129.0 213-252:104.0 1107-…	11446	0	2848	1.9778	2191	0.7693	627810 No KEGG functional class	1	1430	jgi|Neolan1|1312175|estExt_fgenesh1_pg.C_740070	1	1440	Neocallimastix lanati v1.0	Neolan1_GeneCatalog_proteins_20200610.aa
NeoGfMa1|575019	253-511:1181.0 71-212:525.0 505-622:487.0 769-869:432.0 622-739:408.0 213-250:152.0 923-963:141.0 740-760:103.0 874-909:94.0 799-877:261.0 1107-1183:220.0 608-655:193.0 513-559:177.0 667-714:119.0 1021-1051:119.0 932-969:116.0 771-803:107.0 1000-1027:65.0 1059-1074:62.0 339-406:204.0 32-84:128.0 213-247:116.0 309-335:99.0 82-111:79.0 126-182:76.0 469-500:72.0 408-427:59.0 430-456:58.0 112-126:56.…	6842	0	2042	1.696	1308	0.6405	627810 No KEGG functional class	30	1183	jgi|NeoGfMa1|575019|estExt_Genemark4.C_570265	21	955	Neocallimastix sp. Gf-Ma3-1 v1.0	NeoGfMa1_GeneCatalog_proteins_20201119.aa
Pecora1|14693	558-607:164.0 198-236:105.0 279-332:104.0 485-528:85.0 616-635:81.0 241-257:53.0 474-492:52.0 543-566:52.0	696	1.38e-49	267	0.5287	132	0.4944	627813 No KEGG functional class	198	635	jgi|Pecora1|14693|allA15381	198	503	Pecoramyces sp. F1	Pecora1_ExternalModels_proteins_2021-11-19.fasta
Pecora1|14675	449-523:257.0 555-609:204.0 311-360:150.0 181-237:104.0 611-635:89.0 239-263:75.0 278-296:55.0	934	2.35e-84	306	0.4789	171	0.5588	627813 No KEGG functional class	181	635	jgi|Pecora1|14675|allA15363	154	636	Pecoramyces sp. F1	Pecora1_ExternalModels_proteins_2021-11-19.fasta
Orpsp1_1|1181784	449-566:327.0 311-360:149.0 181-237:101.0 408-445:99.0 596-628:78.0 241-263:76.0 278-296:63.0 555-614:211.0 357-375:67.0	1171	2.91e-79	417	0.7104	231	0.554	627813 No KEGG functional class	181	628	jgi|Orpsp1_1|1181784|evm.model.c7180000078610.1	139	587	Orpinomyces sp.	Orpsp1_1_GeneCatalog_proteins_20140826.aa
Orpsp1_1|1181275	556-607:169.0 198-236:99.0 279-332:97.0 485-528:97.0 616-635:81.0 474-492:60.0 241-257:53.0 361-402:65.0 459-478:63.0 543-566:49.0 274-285:44.0	877	7.99e-49	343	0.7191	162	0.4723	627813 No KEGG functional class	198	635	jgi|Orpsp1_1|1181275|evm.model.c7180000076580.1	16	476	Orpinomyces sp.	Orpsp1_1_GeneCatalog_proteins_20140826.aa
Neosp1|627813	1-638:3274.0	3274	0	638	1	627	0.9828	627813 No KEGG functional class	1	638	jgi|Neosp1|627813|MIX8954_1_5	1	638	Neocallimastix californiae G1 v1.0	Neosp1_GeneCatalog_proteins_20170918.aa
Neosp1|512892	543-618:230.0 476-519:117.0 273-328:93.0 209-236:86.0 614-635:83.0 241-264:53.0 343-385:116.0 385-432:49.0	827	7.24e-54	341	0.7381	154	0.4516	627813 No KEGG functional class	209	635	jgi|Neosp1|512892|fgenesh1_pg.180_#_34	187	461	Neocallimastix californiae G1 v1.0	Neosp1_GeneCatalog_proteins_20170918.aa
Neolan1|1294341	543-618:230.0 476-519:117.0 273-328:93.0 209-236:86.0 614-635:83.0 241-264:53.0 343-385:116.0 385-432:49.0	827	1.02e-53	341	0.7302	154	0.4516	627813 No KEGG functional class	209	635	jgi|Neolan1|1294341|estExt_fgenesh1_pm.C_740030	192	466	Neocallimastix lanati v1.0	Neolan1_GeneCatalog_proteins_20200610.aa
Neolan1|1001209	264-361:219.0 549-607:196.0 449-489:162.0 181-241:125.0 498-529:121.0 396-441:89.0 236-264:82.0 357-383:72.0 616-636:72.0	1138	7.02e-108	414	0.6765	215	0.5193	627813 No KEGG functional class	181	636	jgi|Neolan1|1001209|estExt_Genewise1.C_740146	154	611	Neocallimastix lanati v1.0	Neolan1_GeneCatalog_proteins_20200610.aa
Neolan1|1001198	1-638:3269.0	3269	0	638	1	626	0.9812	627813 No KEGG functional class	1	638	jgi|Neolan1|1001198|estExt_Genewise1.C_740132	1	638	Neocallimastix lanati v1.0	Neolan1_GeneCatalog_proteins_20200610.aa
NeoGfMa1|541083	543-635:295.0 240-275:80.0 457-475:70.0 216-237:64.0 476-493:59.0 497-509:51.0 96-150:46.0 358-432:98.0 343-357:53.0 285-328:52.0	868	1.38e-49	390	0.7847	175	0.4487	627813 No KEGG functional class	96	635	jgi|NeoGfMa1|541083|gm4.40076_g	89	493	Neocallimastix sp. Gf-Ma3-1 v1.0	NeoGfMa1_GeneCatalog_proteins_20201119.aa
Pecora1|15293	1-74:257.0 75-133:183.0 205-248:119.0 154-186:87.0	646	1.8e-65	210	0.7778	114	0.5429	632074 No KEGG functional class	1	248	jgi|Pecora1|15293|allA15923	1	255	Pecoramyces sp. F1	Pecora1_ExternalModels_proteins_2021-11-19.fasta
Orpsp1_1|1190201	1-74:257.0 75-133:183.0 205-248:119.0 154-186:87.0	646	1.52e-65	210	0.8015	114	0.5429	632074 No KEGG functional class	1	248	jgi|Orpsp1_1|1190201|evm.model.d7180000077392.1	1	255	Orpinomyces sp.	Orpsp1_1_GeneCatalog_proteins_20140826.aa
Orpsp1_1|1174133	1-74:257.0 75-133:183.0 205-248:119.0 154-186:87.0	646	1.52e-65	210	0.7807	114	0.5429	632074 No KEGG functional class	1	248	jgi|Orpsp1_1|1174133|evm.model.c7180000049031.1	1	255	Orpinomyces sp.	Orpsp1_1_GeneCatalog_proteins_20140826.aa
Orpsp1_1|1174131	1-74:257.0 75-133:183.0 205-248:119.0 154-186:87.0	646	1.52e-65	210	0.7807	114	0.5429	632074 No KEGG functional class	1	248	jgi|Orpsp1_1|1174131|evm.model.c7180000049030.1	1	255	Orpinomyces sp.	Orpsp1_1_GeneCatalog_proteins_20140826.aa
NeoWI3_1|766617	1-157:646.0 149-250:342.0	988	5.6e-121	259	0.5351	192	0.7413	632074 No KEGG functional class	1	250	jgi|NeoWI3_1|766617|estExt_Genemark4.C_640112	1	252	Neocallimastix sp. WI3-B v1.0	NeoWI3_1_GeneCatalog_proteins_20201119.aa
Neosp1|702679	1-186:586.0 203-251:83.0	669	7.91e-78	235	0.8188	123	0.5234	632074 No KEGG functional class	1	251	jgi|Neosp1|702679|fgenesh2_kg.92_#_64_#_Locus7327v1rpkm5.76	1	251	Neocallimastix californiae G1 v1.0	Neosp1_GeneCatalog_proteins_20170918.aa
Neosp1|632074	1-251:1209.0	1209	7.23e-157	251	0.9436	236	0.9402	632074 No KEGG functional class	1	251	jgi|Neosp1|632074|MIX13215_16_95	1	251	Neocallimastix californiae G1 v1.0	Neosp1_GeneCatalog_proteins_20170918.aa
Neolan1|1728793	1-251:1195.0	1195	7.91e-155	251	0.9436	233	0.9283	632074 No KEGG functional class	1	251	jgi|Neolan1|1728793|fgenesh2_kg.126___133___TRINITY_DN35767_c0_g2_i1	1	251	Neocallimastix lanati v1.0	Neolan1_GeneCatalog_proteins_20200610.aa
Neolan1|1061817	1-186:586.0 203-251:83.0	669	1.07e-77	235	0.8188	123	0.5234	632074 No KEGG functional class	1	251	jgi|Neolan1|1061817|estExt_Genewise1Plus.C_1560060	1	251	Neocallimastix lanati v1.0	Neolan1_GeneCatalog_proteins_20200610.aa
NeoGfMa1|336087	1-157:646.0 149-250:342.0	988	5.68e-121	259	0.9664	192	0.7413	632074 No KEGG functional class	1	250	jgi|NeoGfMa1|336087|e_gw1.59.440.1	1	252	Neocallimastix sp. Gf-Ma3-1 v1.0	NeoGfMa1_GeneCatalog_proteins_20201119.aa
Pecora1|14171	875-1099:933.0 1193-1355:657.0 679-789:513.0 584-674:350.0 526-582:217.0 816-857:206.0 1120-1158:180.0 1358-1414:167.0 802-818:74.0 348-539:757.0 1185-1208:107.0 296-320:104.0 643-692:88.0 245-285:78.0 184-211:69.0 724-767:56.0 967-1002:54.0 930-970:53.0 353-398:76.0 275-316:70.0 256-279:62.0 679-710:60.0 1218-1236:56.0 1121-1148:53.0 578-624:50.0 197-225:49.0 297-317:64.0 578-622:63.0 346-382:62…	5492	0	1742	0.5504	1000	0.5741	642241 No KEGG functional class	184	1414	jgi|Pecora1|14171|allA14827	52	3164	Pecoramyces sp. F1	Pecora1_ExternalModels_proteins_2021-11-19.fasta
Pecora1|13047	816-1063:1099.0 342-579:973.0 1193-1406:839.0 679-789:522.0 622-674:198.0 1055-1099:181.0 792-818:104.0 1120-1208:378.0 353-398:76.0 679-727:65.0 256-280:55.0 918-970:55.0 597-616:61.0 724-767:57.0 1218-1236:56.0 533-564:53.0 967-1002:52.0	4824	0	1349	1.0189	874	0.6479	642241 No KEGG functional class	256	1406	jgi|Pecora1|13047|allA13532	56	1315	Pecoramyces sp. F1	Pecora1_ExternalModels_proteins_2021-11-19.fasta
Pecora1|13046	816-1099:1252.0 342-582:976.0 1193-1415:845.0 679-762:409.0 584-674:357.0 1120-1163:198.0 805-818:65.0 1172-1208:154.0 643-692:108.0 597-616:61.0 724-767:57.0 918-970:57.0 967-1002:54.0 353-398:76.0 275-312:70.0 1218-1236:56.0 256-280:55.0 679-700:51.0 1121-1148:49.0	4950	0	1399	1.2847	892	0.6376	642241 No KEGG functional class	256	1415	jgi|Pecora1|13046|allA13531	31	1088	Pecoramyces sp. F1	Pecora1_ExternalModels_proteins_2021-11-19.fasta
Pecora1|12882	816-1051:1031.0 348-582:930.0 679-795:520.0 584-674:362.0 792-818:104.0 1193-1412:847.0 1044-1099:211.0 292-320:119.0 643-692:94.0 721-767:59.0 597-617:54.0 250-281:53.0 210-226:50.0 1120-1208:368.0 353-398:87.0 256-279:65.0 275-312:65.0 679-727:63.0 918-970:56.0 260-289:71.0 578-622:70.0 1218-1236:56.0 967-1002:50.0	5385	0	1607	0.4703	975	0.6067	642241 No KEGG functional class	210	1412	jgi|Pecora1|12882|allA13350	2096	3415	Pecoramyces sp. F1	Pecora1_ExternalModels_proteins_2021-11-19.fasta
Pecora1|12361	342-582:976.0 802-944:538.0 679-789:521.0 950-1042:426.0 1120-1208:378.0 584-658:299.0 1044-1099:229.0 1193-1412:833.0 643-692:108.0 792-818:102.0 967-1002:62.0 597-616:61.0 740-795:60.0 275-312:70.0 679-726:64.0 1218-1236:56.0 256-280:55.0 374-398:55.0 1121-1148:51.0	4944	0	1400	1.267	894	0.6386	642241 No KEGG functional class	256	1412	jgi|Pecora1|12361|allA12793	31	1103	Pecoramyces sp. F1	Pecora1_ExternalModels_proteins_2021-11-19.fasta
Pecora1|5401	816-1099:1242.0 348-582:929.0 1120-1208:380.0 679-742:228.0 584-641:211.0 758-789:132.0 802-818:74.0 657-674:66.0 1193-1372:732.0 296-320:104.0 643-692:100.0 245-281:72.0 724-767:57.0 918-970:54.0 967-1002:54.0 192-211:52.0 597-617:50.0 361-398:75.0 275-316:67.0 256-279:62.0 1207-1236:59.0 1121-1148:53.0 197-225:48.0	4901	0	1454	0.5283	890	0.6121	642241 No KEGG functional class	192	1372	jgi|Pecora1|5401|allA05512	1428	2751	Pecoramyces sp. F1	Pecora1_ExternalModels_proteins_2021-11-19.fasta
Pecora1|4387	801-1099:1262.0 1193-1384:792.0 679-789:510.0 1120-1208:363.0 679-706:57.0 374-398:54.0 918-957:52.0	3090	0	784	1.0538	554	0.7066	642241 No KEGG functional class	374	1384	jgi|Pecora1|4387|allA04458	6	737	Pecoramyces sp. F1	Pecora1_ExternalModels_proteins_2021-11-19.fasta
Pecora1|4382	801-1099:1256.0 427-582:581.0 679-789:510.0 584-674:368.0 1120-1208:363.0 342-421:329.0 1193-1384:792.0 292-320:113.0 643-690:93.0 250-286:71.0 969-1002:58.0 740-767:57.0 597-617:54.0 105-135:53.0 918-957:52.0 614-635:50.0 1193-1384:789.0 353-398:75.0 260-289:70.0 679-706:57.0 184-211:54.0 1141-1208:257.0 701-767:67.0 267-312:61.0 356-382:58.0	6288	0	1840	0.3842	1125	0.6114	642241 No KEGG functional class	105	1384	jgi|Pecora1|4382|allA04453	417	4776	Pecoramyces sp. F1	Pecora1_ExternalModels_proteins_2021-11-19.fasta
Pecora1|3229	806-1099:1236.0 387-582:758.0 679-789:517.0 1120-1208:392.0 584-674:360.0 292-346:113.0 1193-1384:810.0 643-692:97.0 796-818:76.0 613-644:65.0 250-286:58.0 724-767:58.0 109-138:54.0 967-1002:53.0 275-312:76.0 353-398:75.0 679-727:65.0 109-138:60.0 1218-1236:56.0 1121-1148:53.0 578-622:59.0 250-286:58.0 525-572:57.0 292-312:54.0 392-409:53.0 1192-1217:49.0	5362	0	1685	0.4571	982	0.5828	642241 No KEGG functional class	109	1384	jgi|Pecora1|3229|allA03232	600	3684	Pecoramyces sp. F1	Pecora1_ExternalModels_proteins_2021-11-19.fasta
Pecora1|152	821-1099:975.0 1120-1390:898.0 655-789:312.0 572-634:170.0 512-565:168.0 634-650:64.0 477-495:44.0 639-707:140.0 597-646:99.0 248-318:67.0 1219-1269:61.0 739-770:55.0 1121-1148:50.0 122-164:49.0 679-719:80.0 280-312:68.0 345-379:66.0 598-628:64.0 254-282:61.0 966-1001:51.0 1217-1230:48.0 634-671:47.0 260-284:68.0 281-312:62.0 366-399:51.0 681-718:51.0 489-547:48.0 598-635:48.0	3965	0	1665	1.2288	732	0.4396	642241 No KEGG functional class	122	1390	jgi|Pecora1|152|allA00070	133	1331	Pecoramyces sp. F1	Pecora1_ExternalModels_proteins_2021-11-19.fasta
Pecora1|13045	398-523:271.0 3242-3312:201.0 1845-1932:185.0 1744-1814:140.0 3120-3175:139.0 2114-2178:137.0 2925-3003:135.0 2459-2530:127.0 2402-2457:114.0 3212-3245:110.0 2029-2063:100.0 2325-2354:94.0 2176-2202:90.0 2775-2806:90.0 328-365:89.0 1952-1980:79.0 1974-2001:79.0 534-558:77.0 2732-2768:77.0 2289-2326:74.0 573-595:73.0 3024-3047:60.0 2084-2106:59.0 3041-3060:59.0 121-140:58.0 1721-1745:56.0 194-211:…	9508	0	4942	1.7581	1841	0.3725	643126 No KEGG functional class	121	3312	jgi|Pecora1|13045|allA13536	33	2574	Pecoramyces sp. F1	Pecora1_ExternalModels_proteins_2021-11-19.fasta
Pecora1|12362	3245-3316:205.0 3120-3188:145.0 2287-2380:142.0 2485-2538:139.0 2181-2227:134.0 1891-1952:131.0 1843-1895:121.0 1038-1086:120.0 1743-1784:118.0 2702-2774:115.0 2030-2066:104.0 2086-2121:97.0 2984-3019:96.0 2403-2460:95.0 515-585:87.0 1088-1118:84.0 1948-1980:78.0 3045-3064:74.0 2534-2587:73.0 2774-2806:73.0 3212-3234:73.0 910-927:64.0 3020-3042:64.0 993-1024:63.0 2870-2887:62.0 498-516:58.0 2612-…	8709	0	4572	1.7331	1679	0.3672	643126 No KEGG functional class	344	3316	jgi|Pecora1|12362|allA12794	64	2558	Pecoramyces sp. F1	Pecora1_ExternalModels_proteins_2021-11-19.fasta
Neolan1|1342477	1821-3024:5448.0 812-1045:939.0 1604-1818:859.0 3020-3194:818.0 3189-3346:787.0 534-655:552.0 399-534:502.0 711-807:333.0 655-698:210.0 1558-1606:191.0 1045-1094:142.0 299-329:120.0 340-365:116.0 1365-1407:170.0 1293-1346:167.0 81-150:153.0 1452-1488:128.0 1131-1168:125.0 1747-1802:109.0 1171-1214:108.0 1414-1453:108.0 1034-1110:96.0 1610-1645:91.0 765-806:80.0 897-923:79.0 954-1000:74.0 699-726:…	21678	0	7970	1.5254	4181	0.5246	643126 No KEGG functional class	42	3346	jgi|Neolan1|1342477|gm4.22087_g	27	4005	Neocallimastix lanati v1.0	Neolan1_GeneCatalog_proteins_20200610.aa
Neolan1|1319757	1293-3024:8534.0 1023-1275:1185.0 3020-3188:836.0 3189-3346:835.0 655-807:581.0 534-655:544.0 812-939:474.0 400-497:299.0 980-1028:159.0 335-363:104.0 299-328:103.0 228-263:89.0 963-983:68.0 947-964:58.0 474-533:212.0 166-253:172.0 1044-1106:162.0 996-1049:125.0 625-655:106.0 1747-1786:95.0 772-799:89.0 1610-1644:86.0 915-939:67.0 1103-1131:64.0 1901-1926:64.0 2867-2902:60.0 2047-2061:58.0 817-83…	23433	0	7969	1.5662	4501	0.5648	643126 No KEGG functional class	90	3346	jgi|Neolan1|1319757|estExt_fgenesh1_pg.C_3870001	14	3875	Neocallimastix lanati v1.0	Neolan1_GeneCatalog_proteins_20200610.aa
Neolan1|1318469	1579-3024:7239.0 3020-3194:817.0 3189-3346:808.0 871-968:130.0 608-651:106.0 763-813:88.0 1047-1077:78.0 483-526:73.0 1820-1851:67.0 1761-1779:66.0 834-867:64.0 3226-3260:64.0 556-585:57.0 2184-2207:54.0 722-743:52.0 2791-2816:51.0 1044-1106:161.0 1609-1645:91.0 1747-1786:91.0 1021-1049:74.0 1103-1131:64.0 1901-1926:63.0 2867-2902:58.0 2047-2061:56.0 2836-2867:54.0 620-653:94.0 912-932:76.0 316-3…	12298	0	3567	0.9727	2351	0.6591	643126 No KEGG functional class	316	3346	jgi|Neolan1|1318469|estExt_fgenesh1_pg.C_1900016	7	2411	Neocallimastix lanati v1.0	Neolan1_GeneCatalog_proteins_20200610.aa
Neolan1|1317810	1471-3024:7791.0 980-1275:1304.0 3020-3194:817.0 1293-1473:808.0 3189-3346:808.0 655-807:588.0 534-655:541.0 812-939:475.0 399-497:309.0 335-365:110.0 299-328:103.0 228-263:97.0 963-983:68.0 947-964:58.0 474-533:215.0 166-253:175.0 1603-1665:157.0 81-139:138.0 1552-1605:126.0 1036-1105:112.0 2031-2070:95.0 1852-1924:93.0 903-938:79.0 1663-1691:75.0 1465-1508:74.0 2372-2403:72.0 3226-3260:64.0 61-…	23746	0	7905	1.8509	4555	0.5762	643126 No KEGG functional class	1	3346	jgi|Neolan1|1317810|estExt_fgenesh1_pg.C_1660020	1	3981	Neocallimastix lanati v1.0	Neolan1_GeneCatalog_proteins_20200610.aa
Neolan1|1310413	1293-3024:8534.0 980-1275:1337.0 3020-3188:836.0 3189-3346:835.0 655-807:581.0 534-655:544.0 812-939:474.0 400-497:299.0 335-363:104.0 299-328:103.0 228-263:89.0 963-983:68.0 947-964:58.0 474-533:212.0 166-253:172.0 1603-1665:158.0 81-139:127.0 1552-1605:126.0 1036-1105:113.0 2031-2070:96.0 1852-1924:92.0 2172-2220:80.0 903-938:79.0 1465-1508:78.0 1663-1691:74.0 1005-1039:61.0 2867-2902:60.0 2836…	23953	0	8181	1.8327	4604	0.5628	643126 No KEGG functional class	61	3346	jgi|Neolan1|1310413|estExt_fgenesh1_pg.C_560119	49	4024	Neocallimastix lanati v1.0	Neolan1_GeneCatalog_proteins_20200610.aa
Neolan1|1075431	2405-3024:2765.0 1885-2170:1172.0 2179-2363:805.0 3020-3188:794.0 3189-3346:772.0 1851-1892:138.0 1825-1858:72.0 2367-2381:46.0 1146-1275:456.0 985-1074:337.0 871-943:223.0 1550-1596:168.0 1739-1777:148.0 1366-1406:129.0 1419-1487:121.0 1492-1529:109.0 1641-1683:109.0 1293-1317:101.0 1311-1347:100.0 1683-1711:95.0 1717-1741:90.0 1609-1645:89.0 2179-2209:70.0 3229-3260:70.0 963-979:64.0 2118-2159:…	16105	0	6218	1.4103	3111	0.5003	643126 No KEGG functional class	307	3346	jgi|Neolan1|1075431|fgenesh1_pg.29_#_72	7	4184	Neocallimastix lanati v1.0	Neolan1_GeneCatalog_proteins_20200610.aa
Neolan1|1062567	1293-3024:8561.0 284-1275:4986.0 3020-3188:836.0 3189-3346:835.0 228-263:105.0 27-242:889.0 1603-1665:162.0 1554-1606:125.0 2031-2070:95.0 1852-1924:93.0 912-945:83.0 2172-2220:80.0 1068-1122:75.0 1045-1074:73.0 1663-1691:70.0 1478-1502:67.0 1197-1220:64.0 1323-1343:64.0 2867-2902:60.0 937-968:57.0 1373-1395:57.0 2836-2867:55.0 1-8:53.0 603-634:52.0 1499-1529:52.0 2327-2339:50.0 2823-2842:50.0 31…	25837	0	8187	1.5582	4930	0.6022	643126 No KEGG functional class	1	3346	jgi|Neolan1|1062567|estExt_Genewise1Plus.C_1660002	1	4041	Neocallimastix lanati v1.0	Neolan1_GeneCatalog_proteins_20200610.aa
Neolan1|1036086	1851-2597:3330.0 2587-3024:2068.0 655-978:1097.0 1604-1818:848.0 3020-3188:799.0 3189-3346:786.0 534-655:509.0 442-534:329.0 994-1045:191.0 1558-1606:189.0 1045-1094:139.0 392-441:131.0 299-329:107.0 79-124:105.0 342-364:103.0 368-398:102.0 228-263:55.0 1-8:53.0 162-190:51.0 43-62:44.0 1365-1407:180.0 1293-1346:171.0 1799-1853:143.0 1452-1488:131.0 1131-1168:127.0 1414-1453:122.0 1176-1214:104.0 …	20779	0	7602	1.4458	4002	0.5264	643126 No KEGG functional class	1	3346	jgi|Neolan1|1036086|estExt_Genewise1Plus.C_290150	1	5233	Neocallimastix lanati v1.0	Neolan1_GeneCatalog_proteins_20200610.aa
Piromy_p0_1|533080	174-579:2122.0 109-157:174.0 72-102:104.0 27-55:80.0 85-105:66.0 25-52:107.0	2653	0	564	1.0994	450	0.7979	662688 No KEGG functional class	25	579	jgi|Piromy_p0_1|533080|fgenesh2_kg.chromosome_5___2553___TRINITY_DN8653_c10_g13_i2	1	507	Piromyces sp. UH3-1 v2.0	Piromy_p0_1_GeneCatalog_proteins_20200513.aa
Piromy_p0_1|485951	379-495:528.0 174-305:515.0 326-373:226.0 499-525:137.0 531-565:118.0 117-153:107.0 24-57:100.0 307-328:79.0 74-97:72.0 567-581:66.0 61-103:155.0 27-47:49.0 83-109:84.0 115-150:69.0	2305	0	618	0.9984	393	0.6359	662688 No KEGG functional class	24	581	jgi|Piromy_p0_1|485951|estExt_Genemark4.C_chromosome_7_t30158	22	570	Piromyces sp. UH3-1 v2.0	Piromy_p0_1_GeneCatalog_proteins_20200513.aa
Pecora1|11191	175-305:528.0 379-495:522.0 326-377:240.0 499-525:141.0 25-96:127.0 531-561:114.0 307-328:82.0 117-140:78.0 567-579:62.0 97-117:43.0 47-108:147.0	2084	0	572	0.9862	359	0.6276	662688 No KEGG functional class	25	579	jgi|Pecora1|11191|allA11522	19	578	Pecoramyces sp. F1	Pecora1_ExternalModels_proteins_2021-11-19.fasta
Pecora1|2163	174-579:2139.0 56-155:391.0 11-60:218.0 77-102:91.0 103-150:90.0 25-50:119.0 141-162:47.0 115-140:114.0 27-52:82.0 71-100:59.0	3350	0	760	1.3172	570	0.75	662688 No KEGG functional class	11	579	jgi|Pecora1|2163|allA02153	10	576	Pecoramyces sp. F1	Pecora1_ExternalModels_proteins_2021-11-19.fasta
Pecora1|2162	174-579:2158.0 66-164:392.0 12-63:209.0 111-151:91.0 77-102:87.0 27-52:91.0 77-105:60.0 25-52:117.0 115-140:114.0	3319	0	733	1.277	559	0.7626	662688 No KEGG functional class	12	579	jgi|Pecora1|2162|allA02152	11	573	Pecoramyces sp. F1	Pecora1_ExternalModels_proteins_2021-11-19.fasta
Neolan1|1670560	174-579:2230.0 96-161:288.0 25-52:113.0	2631	0	500	1.0352	451	0.902	662688 No KEGG functional class	25	579	jgi|Neolan1|1670560|fgenesh2_kg.37___551___TRINITY_DN855_c0_g1_i5	3	480	Neocallimastix lanati v1.0	Neolan1_GeneCatalog_proteins_20200610.aa
Neolan1|1011920	379-495:532.0 174-307:527.0 326-374:225.0 499-525:145.0 531-561:111.0 25-57:106.0 73-94:83.0 308-328:77.0 117-138:65.0 567-580:63.0 96-109:46.0 66-97:123.0 27-48:73.0 97-110:50.0 117-138:87.0 83-100:61.0 137-158:44.0 115-152:112.0	2530	0	652	1.1379	429	0.658	662688 No KEGG functional class	25	580	jgi|Neolan1|1011920|estExt_Genewise1.C_1370017	23	573	Neocallimastix lanati v1.0	Neolan1_GeneCatalog_proteins_20200610.aa
Neolan1|934182	1-581:3245.0 115-142:130.0 25-52:130.0 77-134:82.0 27-52:75.0 117-151:81.0 77-102:75.0	3818	0	782	1.346	668	0.8542	662688 No KEGG functional class	1	581	jgi|Neolan1|934182|e_gw1.27.209.1	1	581	Neocallimastix lanati v1.0	Neolan1_GeneCatalog_proteins_20200610.aa
Neolan1|292348	174-581:2215.0 61-159:446.0 50-65:53.0 77-110:84.0 27-52:79.0 25-52:129.0	3006	0	611	1.1572	513	0.8396	662688 No KEGG functional class	25	581	jgi|Neolan1|292348|CE292347_124404	3	528	Neocallimastix lanati v1.0	Neolan1_GeneCatalog_proteins_20200610.aa
Neolan1|134374	174-581:2215.0 61-159:446.0 50-65:53.0 77-110:84.0 27-52:79.0 25-52:129.0	3006	0	611	1.1572	513	0.8396	662688 No KEGG functional class	25	581	jgi|Neolan1|134374|CE134373_125133	3	528	Neocallimastix lanati v1.0	Neolan1_GeneCatalog_proteins_20200610.aa
Pecora1|6902	38-145:426.0 141-255:382.0 299-375:323.0 404-457:197.0 476-514:177.0 4-31:92.0 260-277:45.0 298-379:297.0 169-235:221.0 49-89:108.0 237-274:75.0 90-168:62.0 396-493:253.0 299-359:148.0 165-205:101.0 237-257:75.0 202-236:64.0 496-514:43.0 259-270:42.0 162-236:194.0 78-139:130.0 237-259:63.0 324-461:212.0 299-327:97.0 477-491:47.0 77-141:156.0 53-89:116.0 52-89:107.0	4253	0	1515	3	776	0.5122	663118 No KEGG functional class	4	514	jgi|Pecora1|6902|allA06964	2	504	Pecoramyces sp. F1	Pecora1_ExternalModels_proteins_2021-11-19.fasta
Pecora1|3610	38-275:1005.0 410-510:330.0 298-378:296.0 1-39:87.0 377-404:49.0 298-379:308.0 162-235:228.0 49-89:107.0 119-154:103.0 237-261:77.0 91-119:67.0 403-496:245.0 299-357:199.0 162-205:111.0 358-407:108.0 235-270:93.0 208-236:72.0 496-513:58.0 171-236:217.0 50-89:116.0 106-140:99.0 237-259:65.0 401-461:148.0 317-391:123.0 476-493:79.0 78-143:143.0 408-445:93.0 448-493:73.0 54-89:105.0	4804	0	1608	3.1406	876	0.5448	663118 No KEGG functional class	1	513	jgi|Pecora1|3610|allA03584	1	508	Pecoramyces sp. F1	Pecora1_ExternalModels_proteins_2021-11-19.fasta
NeoWI3_1|800072	1-278:1218.0 406-514:412.0 298-379:354.0 396-509:373.0 299-379:324.0 165-205:113.0 237-268:93.0 208-236:72.0 377-394:54.0 299-379:349.0 166-236:236.0 117-164:114.0 49-89:100.0 91-119:57.0 237-257:54.0 403-511:322.0 299-357:188.0 359-396:97.0 168-236:238.0 78-136:138.0 237-257:54.0 317-389:141.0 404-461:130.0 476-493:64.0 169-235:199.0 237-257:54.0 78-136:138.0 78-139:125.0 52-89:119.0 52-89:115.0…	6261	0	1930	3.0831	1140	0.5907	663118 No KEGG functional class	1	514	jgi|NeoWI3_1|800072|estExt_fgenesh1_pg.C_3_t10165	1	626	Neocallimastix sp. WI3-B v1.0	NeoWI3_1_GeneCatalog_proteins_20201119.aa
NeoWI3_1|791128	1-278:1365.0 298-399:498.0 407-514:463.0 299-379:321.0 168-236:221.0 119-152:115.0 49-89:112.0 237-274:86.0 91-119:65.0 377-392:42.0 403-498:318.0 299-357:196.0 165-205:109.0 237-270:107.0 358-408:97.0 208-236:68.0 496-511:53.0 155-233:198.0 52-89:122.0 238-254:53.0 255-272:43.0 404-461:150.0 317-391:133.0 476-493:66.0 78-162:137.0 78-139:135.0 299-327:106.0	5379	0	1601	3.1392	993	0.6202	663118 No KEGG functional class	1	514	jgi|NeoWI3_1|791128|estExt_fgenesh1_pm.C_170324	1	510	Neocallimastix sp. WI3-B v1.0	NeoWI3_1_GeneCatalog_proteins_20201119.aa
Neosp1|673258	1-278:1176.0 406-514:404.0 298-379:347.0 396-509:362.0 299-379:321.0 165-205:113.0 237-270:105.0 208-236:51.0 377-394:51.0 298-379:352.0 166-235:207.0 117-164:105.0 29-89:102.0 237-257:61.0 91-119:56.0 409-511:327.0 299-357:192.0 359-406:110.0 159-236:216.0 78-139:142.0 237-257:66.0 317-391:135.0 404-461:132.0 476-497:71.0 169-235:197.0 237-257:53.0 408-445:101.0 476-496:84.0 77-139:142.0 52-89:1…	6361	0	2037	3.2488	1154	0.5665	663118 No KEGG functional class	1	514	jgi|Neosp1|673258|estExt_fgenesh1_pg.C_1560032	1	627	Neocallimastix californiae G1 v1.0	Neosp1_GeneCatalog_proteins_20170918.aa
Neosp1|663118	1-278:1452.0 298-514:1060.0 299-380:327.0 168-235:217.0 119-152:110.0 49-89:109.0 237-275:84.0 91-119:67.0 377-392:43.0 403-498:307.0 299-357:197.0 237-270:110.0 165-205:109.0 358-408:88.0 208-236:67.0 496-511:43.0 137-236:203.0 52-89:124.0 232-254:61.0 377-461:150.0 299-327:106.0 476-493:59.0 78-139:139.0 317-391:127.0 78-152:127.0	5486	0	1635	3.1809	1021	0.6245	663118 No KEGG functional class	1	514	jgi|Neosp1|663118|estExt_fgenesh1_pg.C_20039	1	514	Neocallimastix californiae G1 v1.0	Neosp1_GeneCatalog_proteins_20170918.aa
Neolan1|1058046	1-278:1176.0 406-514:399.0 298-379:342.0 396-509:367.0 299-379:329.0 165-205:113.0 237-270:105.0 208-236:51.0 377-394:51.0 298-379:352.0 166-236:209.0 117-164:105.0 29-89:102.0 237-257:66.0 91-119:56.0 409-511:335.0 299-357:192.0 359-406:110.0 159-236:219.0 78-139:144.0 237-257:66.0 317-391:135.0 404-461:132.0 476-497:71.0 169-235:205.0 237-257:53.0 408-445:101.0 476-496:84.0 77-139:142.0 52-89:1…	6396	0	2038	3.2504	1158	0.5682	663118 No KEGG functional class	1	514	jgi|Neolan1|1058046|estExt_Genewise1Plus.C_1250035	1	627	Neocallimastix lanati v1.0	Neolan1_GeneCatalog_proteins_20200610.aa
Neolan1|11572	1-278:1452.0 298-514:1048.0 299-380:323.0 168-235:217.0 119-152:110.0 49-89:109.0 237-275:95.0 91-119:67.0 377-392:43.0 403-498:318.0 299-357:197.0 237-270:110.0 165-205:109.0 358-408:88.0 208-236:67.0 496-511:43.0 137-236:206.0 52-89:124.0 232-254:61.0 377-461:150.0 299-327:106.0 476-493:59.0 78-139:139.0 78-152:138.0 317-391:127.0	5506	0	1635	3.1809	1022	0.6251	663118 No KEGG functional class	1	514	jgi|Neolan1|11572|CE11571_2525	1	514	Neocallimastix lanati v1.0	Neolan1_GeneCatalog_proteins_20200610.aa
NeoGfMa1|671847	1-278:1365.0 298-399:498.0 407-514:463.0 299-379:321.0 168-236:221.0 119-152:115.0 49-89:112.0 237-274:86.0 91-119:65.0 377-392:42.0 403-498:318.0 299-357:196.0 165-205:109.0 237-270:107.0 358-408:97.0 208-236:68.0 496-511:53.0 155-233:198.0 52-89:122.0 238-254:53.0 255-272:43.0 404-461:150.0 317-391:133.0 476-493:66.0 78-162:137.0 78-139:135.0 299-327:106.0	5379	0	1601	3.1392	993	0.6202	663118 No KEGG functional class	1	514	jgi|NeoGfMa1|671847|MIX65462_22_60	1	510	Neocallimastix sp. Gf-Ma3-1 v1.0	NeoGfMa1_GeneCatalog_proteins_20201119.aa
NeoGfMa1|666216	1-278:1215.0 406-514:412.0 298-379:354.0 396-509:373.0 299-379:324.0 165-205:112.0 237-268:93.0 208-236:72.0 377-394:50.0 299-379:349.0 166-236:236.0 117-164:114.0 49-89:100.0 91-119:57.0 237-257:54.0 403-511:318.0 299-357:188.0 359-396:97.0 168-236:238.0 78-136:138.0 237-257:54.0 319-389:140.0 404-461:130.0 476-493:64.0 169-235:199.0 237-257:54.0 78-136:138.0 78-139:125.0 52-89:119.0 52-89:115.0…	6141	0	1899	3.0335	1120	0.5898	663118 No KEGG functional class	1	514	jgi|NeoGfMa1|666216|MIX59831_6_34	1	626	Neocallimastix sp. Gf-Ma3-1 v1.0	NeoGfMa1_GeneCatalog_proteins_20201119.aa
Pecora1|11107	23-145:533.0 191-286:391.0 147-192:169.0	1093	2.7e-130	265	0.8893	203	0.766	663203 No KEGG functional class	23	286	jgi|Pecora1|11107|allA11437	21	280	Pecoramyces sp. F1	Pecora1_ExternalModels_proteins_2021-11-19.fasta
Orpsp1_1|1175009	27-145:520.0 191-236:178.0 147-192:169.0	867	8.58e-100	211	1.0096	160	0.7583	663203 No KEGG functional class	27	236	jgi|Orpsp1_1|1175009|evm.model.c7180000052296.2	1	206	Orpinomyces sp.	Orpsp1_1_GeneCatalog_proteins_20140826.aa
NeoWI3_1|912253	1-303:1406.0	1406	0	303	1	270	0.8911	663203 No KEGG functional class	1	303	jgi|NeoWI3_1|912253|fgenesh2_kg.17___839___TRINITY_DN12791_c2_g1_i1	1	303	Neocallimastix sp. WI3-B v1.0	NeoWI3_1_GeneCatalog_proteins_20201119.aa
NeoWI3_1|108940	1-144:572.0 186-286:424.0 146-187:183.0	1179	1.04e-141	287	0.9631	219	0.7631	663203 No KEGG functional class	1	286	jgi|NeoWI3_1|108940|CE108939_3001	1	281	Neocallimastix sp. WI3-B v1.0	NeoWI3_1_GeneCatalog_proteins_20201119.aa
Neosp1|667221	1-144:594.0 190-286:417.0 159-187:108.0 146-160:77.0	1196	2.54e-139	285	0.9532	226	0.793	663203 No KEGG functional class	1	286	jgi|Neosp1|667221|estExt_fgenesh1_pg.C_400089	1	282	Neocallimastix californiae G1 v1.0	Neosp1_GeneCatalog_proteins_20170918.aa
Neosp1|663203	1-303:1437.0	1437	0	303	1	279	0.9208	663203 No KEGG functional class	1	303	jgi|Neosp1|663203|estExt_fgenesh1_pg.C_20133	1	303	Neocallimastix californiae G1 v1.0	Neosp1_GeneCatalog_proteins_20170918.aa
Neolan1|1677641	1-144:594.0 190-286:417.0 159-187:108.0 146-160:77.0	1196	3.45e-139	285	0.9532	226	0.793	663203 No KEGG functional class	1	286	jgi|Neolan1|1677641|fgenesh2_kg.46___189___TRINITY_DN2663_c0_g1_i1	1	282	Neocallimastix lanati v1.0	Neolan1_GeneCatalog_proteins_20200610.aa
Neolan1|1617194	1-303:1437.0	1437	0	303	1	279	0.9208	663203 No KEGG functional class	1	303	jgi|Neolan1|1617194|fgenesh2_kg.1___1949___TRINITY_DN2663_c0_g1_i2	1	303	Neocallimastix lanati v1.0	Neolan1_GeneCatalog_proteins_20200610.aa
NeoGfMa1|581014	1-303:1406.0	1406	0	303	1	270	0.8911	663203 No KEGG functional class	1	303	jgi|NeoGfMa1|581014|estExt_fgenesh1_pg.C_4_t20155	1	303	Neocallimastix sp. Gf-Ma3-1 v1.0	NeoGfMa1_GeneCatalog_proteins_20201119.aa
NeoGfMa1|555550	1-144:572.0 186-286:424.0 146-187:183.0	1179	1.05e-141	287	0.9631	219	0.7631	663203 No KEGG functional class	1	286	jgi|NeoGfMa1|555550|fgenesh1_pm.37_#_39	1	281	Neocallimastix sp. Gf-Ma3-1 v1.0	NeoGfMa1_GeneCatalog_proteins_20201119.aa
Piromy_p0_1|524108	166-235:260.0 20-95:223.0 244-292:173.0 150-163:68.0 100-116:51.0	775	4.13e-78	226	0.7197	136	0.6018	663238 No KEGG functional class	20	292	jgi|Piromy_p0_1|524108|fgenesh2_kg.chromosome_3___594___TRINITY_DN8658_c9_g1_i1	20	298	Piromyces sp. UH3-1 v2.0	Piromy_p0_1_GeneCatalog_proteins_20200513.aa
Pirfi3|410182	168-235:248.0 20-95:219.0 254-292:176.0 133-163:96.0 100-116:46.0	785	1.19e-79	231	0.7726	138	0.5974	663238 No KEGG functional class	20	292	jgi|Pirfi3|410182|estExt_fgenesh1_pg.C_90016	20	294	Piromyces finnis v3.0	Pirfi3_GeneCatalog_proteins_20160330.aa
Pecora1|2067	16-116:352.0 166-235:272.0 258-292:150.0 133-173:140.0	914	2.73e-101	247	0.8179	162	0.6559	663238 No KEGG functional class	16	292	jgi|Pecora1|2067|allA02107	15	300	Pecoramyces sp. F1	Pecora1_ExternalModels_proteins_2021-11-19.fasta
Orpsp1_1|1183852	166-235:272.0 66-116:183.0 258-292:150.0 133-173:140.0	745	1.18e-78	197	0.8312	132	0.6701	663238 No KEGG functional class	66	292	jgi|Orpsp1_1|1183852|evm.model.c7180000086931.1	1	236	Orpinomyces sp.	Orpsp1_1_GeneCatalog_proteins_20140826.aa
NeoWI3_1|534324	16-116:492.0 166-237:329.0 238-292:246.0 133-166:155.0	1222	1.42e-142	262	0.8851	225	0.8588	663238 No KEGG functional class	16	292	jgi|NeoWI3_1|534324|estExt_Genewise1.C_17_t20187	15	295	Neocallimastix sp. WI3-B v1.0	NeoWI3_1_GeneCatalog_proteins_20201119.aa
Neosp1|663238	133-292:860.0 1-116:549.0	1409	4.66e-178	276	0.9452	264	0.9565	663238 No KEGG functional class	1	292	jgi|Neosp1|663238|estExt_fgenesh1_pg.C_20176	1	292	Neocallimastix californiae G1 v1.0	Neosp1_GeneCatalog_proteins_20170918.aa
Neolan1|972905	133-292:860.0 1-116:549.0	1409	6.29e-178	276	0.9452	264	0.9565	663238 No KEGG functional class	1	292	jgi|Neolan1|972905|estExt_Genewise1.C_1_t20168	1	292	Neocallimastix lanati v1.0	Neolan1_GeneCatalog_proteins_20200610.aa
NeoGfMa1|563750	16-116:492.0 166-237:329.0 238-292:246.0 133-166:155.0	1222	1.44e-142	262	0.8851	225	0.8588	663238 No KEGG functional class	16	292	jgi|NeoGfMa1|563750|estExt_Genemark4.C_4_t20441	15	295	Neocallimastix sp. Gf-Ma3-1 v1.0	NeoGfMa1_GeneCatalog_proteins_20201119.aa
Caecom1|525189	133-249:280.0 18-96:207.0 256-292:146.0	633	6.8e-67	233	0.754	113	0.485	663238 No KEGG functional class	18	292	jgi|Caecom1|525189|estExt_fgenesh1_pg.C_870005	18	309	Caecomyces churrovis A v1.0	Caecom1_GeneCatalog_proteins_20171213.aa
Anasp1|249239	16-96:239.0	239	1.11e-24	81	0.7431	40	0.4938	663238 No KEGG functional class	16	96	jgi|Anasp1|249239|fgenesh1_pg.334_#_6	17	97	Anaeromyces robustus v1.0	Anasp1_GeneCatalog_proteins_20160330.aa
Piromy_p0_1|439236	86-313:886.0 317-488:648.0 1-63:210.0 518-552:193.0 486-518:147.0 70-90:71.0	2155	0	552	0.9718	380	0.6884	663240 No KEGG functional class	1	552	jgi|Piromy_p0_1|439236|estExt_fgenesh1_pg.C_chromosome_3_t10382	1	568	Piromyces sp. UH3-1 v2.0	Piromy_p0_1_GeneCatalog_proteins_20200513.aa
Pirfi3|346838	86-310:869.0 317-518:816.0 1-63:213.0 518-551:171.0 70-90:70.0	2139	0	545	0.9715	379	0.6954	663240 No KEGG functional class	1	551	jgi|Pirfi3|346838|estExt_Genewise1Plus.C_9_t10014	1	560	Piromyces finnis v3.0	Pirfi3_GeneCatalog_proteins_20160330.aa
Pecora1|2885	317-552:998.0 70-308:958.0 1-63:235.0	2191	0	538	0.9711	382	0.71	663240 No KEGG functional class	1	552	jgi|Pecora1|2885|allA02875	1	553	Pecoramyces sp. F1	Pecora1_ExternalModels_proteins_2021-11-19.fasta
NeoWI3_1|920332	70-311:994.0 313-551:985.0 1-63:228.0	2207	0	544	0.9749	392	0.7206	663240 No KEGG functional class	1	551	jgi|NeoWI3_1|920332|fgenesh2_kg.26___195___TRINITY_DN12479_c6_g6_i1	1	557	Neocallimastix sp. WI3-B v1.0	NeoWI3_1_GeneCatalog_proteins_20201119.aa
NeoWI3_1|757795	1-552:2819.0	2819	0	552	1	518	0.9384	663240 No KEGG functional class	1	552	jgi|NeoWI3_1|757795|estExt_Genemark4.C_17_t10394	1	552	Neocallimastix sp. WI3-B v1.0	NeoWI3_1_GeneCatalog_proteins_20201119.aa
Neolan1|1300655	1-552:2960.0	2960	0	552	1	552	1	663240 No KEGG functional class	1	552	jgi|Neolan1|1300655|estExt_fgenesh1_pg.C_10271	1	552	Neocallimastix lanati v1.0	Neolan1_GeneCatalog_proteins_20200610.aa
Neolan1|1042036	317-552:1031.0 70-308:970.0 1-63:232.0	2233	0	538	0.9694	394	0.7323	663240 No KEGG functional class	1	552	jgi|Neolan1|1042036|estExt_Genewise1Plus.C_460301	1	555	Neocallimastix lanati v1.0	Neolan1_GeneCatalog_proteins_20200610.aa
NeoGfMa1|651302	1-552:2819.0	2819	0	552	1	518	0.9384	663240 No KEGG functional class	1	552	jgi|NeoGfMa1|651302|MIX44917_2_18	1	552	Neocallimastix sp. Gf-Ma3-1 v1.0	NeoGfMa1_GeneCatalog_proteins_20201119.aa
NeoGfMa1|605415	70-311:994.0 313-551:985.0 1-63:228.0	2207	0	544	0.9749	392	0.7206	663240 No KEGG functional class	1	551	jgi|NeoGfMa1|605415|estExt_fgenesh1_pm.C_880037	1	557	Neocallimastix sp. Gf-Ma3-1 v1.0	NeoGfMa1_GeneCatalog_proteins_20201119.aa
Anasp1|329637	84-314:899.0 317-517:782.0 1-63:208.0 518-551:184.0 70-90:67.0	2140	0	550	0.9666	383	0.6964	663240 No KEGG functional class	1	551	jgi|Anasp1|329637|fgenesh2_kg.334_#_7_#_Locus3423v1rpkm12.18	1	569	Anaeromyces robustus v1.0	Anasp1_GeneCatalog_proteins_20160330.aa
Neosp1|705548	189-491:1061.0 496-552:213.0 19-111:181.0 114-147:135.0 150-193:105.0	1695	0	531	0.9283	306	0.5763	664385 No KEGG functional class	19	552	jgi|Neosp1|705548|fgenesh2_kg.180_#_2_#_Locus10743v1rpkm2.62	18	568	Neocallimastix californiae G1 v1.0	Neosp1_GeneCatalog_proteins_20170918.aa
Neosp1|704813	309-491:681.0 191-299:367.0 6-111:251.0 498-552:191.0 115-148:137.0 143-191:108.0	1735	0	536	0.9658	315	0.5877	664385 No KEGG functional class	6	552	jgi|Neosp1|704813|fgenesh2_kg.147_#_29_#_Locus3732v1rpkm17.78	5	551	Neocallimastix californiae G1 v1.0	Neosp1_GeneCatalog_proteins_20170918.aa
Neosp1|702018	62-559:2403.0 1-60:173.0	2576	0	558	0.8455	466	0.8351	664385 No KEGG functional class	1	559	jgi|Neosp1|702018|fgenesh2_kg.78_#_13_#_Locus2186v1rpkm39.97	1	558	Neocallimastix californiae G1 v1.0	Neosp1_GeneCatalog_proteins_20170918.aa
Neosp1|675317	191-556:1309.0 19-113:228.0 113-149:154.0 146-188:91.0	1782	0	541	0.7262	329	0.6081	664385 No KEGG functional class	19	556	jgi|Neosp1|675317|estExt_fgenesh1_pg.C_2260007	18	563	Neocallimastix californiae G1 v1.0	Neosp1_GeneCatalog_proteins_20170918.aa
Neosp1|664385	1-576:3017.0	3017	0	576	1	565	0.9809	664385 No KEGG functional class	1	576	jgi|Neosp1|664385|estExt_fgenesh1_pg.C_110142	1	576	Neocallimastix californiae G1 v1.0	Neosp1_GeneCatalog_proteins_20170918.aa
Neosp1|504234	187-491:1082.0 496-548:216.0 15-113:206.0 113-147:159.0 161-188:63.0	1726	0	520	0.6915	313	0.6019	664385 No KEGG functional class	15	548	jgi|Neosp1|504234|fgenesh1_pg.44_#_65	14	542	Neocallimastix californiae G1 v1.0	Neosp1_GeneCatalog_proteins_20170918.aa
Neosp1|417089	169-556:1549.0 41-148:385.0 1-37:95.0	2029	0	533	0.8825	361	0.6773	664385 No KEGG functional class	1	556	jgi|Neosp1|417089|e_gw1.114.70.1	2	539	Neocallimastix californiae G1 v1.0	Neosp1_GeneCatalog_proteins_20170918.aa
Neosp1|411232	194-420:990.0 52-188:472.0 431-538:453.0	1915	0	472	0.9916	344	0.7288	664385 No KEGG functional class	52	538	jgi|Neosp1|411232|e_gw1.78.116.1	8	476	Neocallimastix californiae G1 v1.0	Neosp1_GeneCatalog_proteins_20170918.aa
Neosp1|405098	310-487:725.0 181-310:443.0 44-150:323.0 144-188:100.0 19-37:57.0	1648	0	479	0.9876	295	0.6159	664385 No KEGG functional class	19	487	jgi|Neosp1|405098|e_gw1.44.69.1	18	485	Neocallimastix californiae G1 v1.0	Neosp1_GeneCatalog_proteins_20170918.aa
Neosp1|397408	194-538:1519.0 52-188:459.0	1978	0	482	0.9777	355	0.7365	664385 No KEGG functional class	52	538	jgi|Neosp1|397408|e_gw1.11.193.1	8	493	Neocallimastix californiae G1 v1.0	Neosp1_GeneCatalog_proteins_20170918.aa
Pecora1|1763	1-54:238.0 73-117:217.0 152-167:78.0	533	1.08e-55	115	0.5721	100	0.8696	664436 No KEGG functional class	1	167	jgi|Pecora1|1763|allA01742	1	199	Pecoramyces sp. F1	Pecora1_ExternalModels_proteins_2021-11-19.fasta
NeoWI3_1|814792	1-54:258.0 74-114:211.0 152-168:86.0	555	1.08e-58	112	0.6667	105	0.9375	664436 No KEGG functional class	1	168	jgi|NeoWI3_1|814792|estExt_fgenesh1_pg.C_690039	1	168	Neocallimastix sp. WI3-B v1.0	NeoWI3_1_GeneCatalog_proteins_20201119.aa
NeoWI3_1|585471	1-54:237.0 73-118:229.0 152-168:82.0	548	2e-57	117	0.5342	103	0.8803	664436 No KEGG functional class	1	168	jgi|NeoWI3_1|585471|estExt_Genewise1Plus.C_28_t10264	1	219	Neocallimastix sp. WI3-B v1.0	NeoWI3_1_GeneCatalog_proteins_20201119.aa
Neosp1|699145	1-54:234.0 73-118:229.0 152-168:82.0	545	3.83e-57	117	0.52	102	0.8718	664436 No KEGG functional class	1	168	jgi|Neosp1|699145|fgenesh2_kg.27_#_33_#_Locus1033v1rpkm120.01	1	225	Neocallimastix californiae G1 v1.0	Neosp1_GeneCatalog_proteins_20170918.aa
Neosp1|664436	1-54:264.0 73-118:252.0 152-168:89.0	605	1.11e-65	117	0.6964	117	1	664436 No KEGG functional class	1	168	jgi|Neosp1|664436|estExt_fgenesh1_pg.C_120028	1	168	Neocallimastix californiae G1 v1.0	Neosp1_GeneCatalog_proteins_20170918.aa
Neolan1|1727319	1-54:264.0 73-118:252.0 152-168:89.0	605	1.5e-65	117	0.6964	117	1	664436 No KEGG functional class	1	168	jgi|Neolan1|1727319|fgenesh2_kg.122___185___TRINITY_DN642_c0_g2_i1	1	168	Neocallimastix lanati v1.0	Neolan1_GeneCatalog_proteins_20200610.aa
Neolan1|935958	1-54:234.0 73-118:229.0 152-168:82.0	545	5.02e-57	117	0.52	102	0.8718	664436 No KEGG functional class	1	168	jgi|Neolan1|935958|e_gw1.31.3.1	1	225	Neocallimastix lanati v1.0	Neolan1_GeneCatalog_proteins_20200610.aa
NeoGfMa1|584293	1-54:258.0 74-114:211.0 152-168:86.0	555	1.09e-58	112	0.6667	105	0.9375	664436 No KEGG functional class	1	168	jgi|NeoGfMa1|584293|estExt_fgenesh1_pg.C_130262	1	168	Neocallimastix sp. Gf-Ma3-1 v1.0	NeoGfMa1_GeneCatalog_proteins_20201119.aa
Caecom1|548180	73-118:211.0 1-54:206.0 152-168:82.0	499	2.41e-51	117	0.6842	93	0.7949	664436 No KEGG functional class	1	168	jgi|Caecom1|548180|gm1.5968_g	1	171	Caecomyces churrovis A v1.0	Caecom1_GeneCatalog_proteins_20171213.aa
Caecom1|492596	1-54:217.0 73-118:212.0 152-168:81.0	510	7.67e-53	117	0.7048	94	0.8034	664436 No KEGG functional class	1	168	jgi|Caecom1|492596|fgenesh1_pg.132_#_11	1	166	Caecomyces churrovis A v1.0	Caecom1_GeneCatalog_proteins_20171213.aa
Piromy_p0_1|519382	401-590:625.0 71-194:328.0 193-271:296.0 322-402:265.0 1-65:192.0 278-320:98.0	1804	0	582	0.9798	334	0.5739	664796 No KEGG functional class	1	590	jgi|Piromy_p0_1|519382|fgenesh2_kg.chromosome_1___1021___TRINITY_DN8096_c0_g1_i1	3	591	Piromyces sp. UH3-1 v2.0	Piromy_p0_1_GeneCatalog_proteins_20200513.aa
Pecora1|2662	48-279:974.0 394-595:781.0 317-394:344.0 269-313:160.0	2259	0	557	1.0183	404	0.7253	664796 No KEGG functional class	48	595	jgi|Pecora1|2662|allA02706	1	546	Pecoramyces sp. F1	Pecora1_ExternalModels_proteins_2021-11-19.fasta
NeoWI3_1|867411	1-275:1220.0 400-595:812.0 270-386:475.0	2507	0	588	1	461	0.784	664796 No KEGG functional class	1	595	jgi|NeoWI3_1|867411|MIX50520_3_9	1	587	Neocallimastix sp. WI3-B v1.0	NeoWI3_1_GeneCatalog_proteins_20201119.aa
NeoWI3_1|788274	1-596:2927.0	2927	0	596	1	542	0.9094	664796 No KEGG functional class	1	596	jgi|NeoWI3_1|788274|estExt_fgenesh1_pm.C_80088	1	596	Neocallimastix sp. WI3-B v1.0	NeoWI3_1_GeneCatalog_proteins_20201119.aa
Neosp1|667575	1-275:1201.0 400-595:815.0 270-386:480.0	2496	0	588	1	458	0.7789	664796 No KEGG functional class	1	595	jgi|Neosp1|667575|estExt_fgenesh1_pg.C_460014	1	587	Neocallimastix californiae G1 v1.0	Neosp1_GeneCatalog_proteins_20170918.aa
Neosp1|664796	1-596:3173.0	3173	0	596	1	596	1	664796 No KEGG functional class	1	596	jgi|Neosp1|664796|estExt_fgenesh1_pg.C_150065	1	596	Neocallimastix californiae G1 v1.0	Neosp1_GeneCatalog_proteins_20170918.aa
Neolan1|1708581	1-275:1201.0 400-595:817.0 270-386:480.0	2498	0	588	1	459	0.7806	664796 No KEGG functional class	1	595	jgi|Neolan1|1708581|fgenesh2_kg.87___503___TRINITY_DN649_c1_g4_i1	1	587	Neocallimastix lanati v1.0	Neolan1_GeneCatalog_proteins_20200610.aa
Neolan1|1292719	1-596:3167.0	3167	0	596	1	595	0.9983	664796 No KEGG functional class	1	596	jgi|Neolan1|1292719|estExt_fgenesh1_pm.C_530092	1	596	Neocallimastix lanati v1.0	Neolan1_GeneCatalog_proteins_20200610.aa
NeoGfMa1|415127	1-275:1220.0 400-595:812.0 270-386:475.0	2507	0	588	1	461	0.784	664796 No KEGG functional class	1	595	jgi|NeoGfMa1|415127|estExt_Genewise1Plus.C_530149	1	587	Neocallimastix sp. Gf-Ma3-1 v1.0	NeoGfMa1_GeneCatalog_proteins_20201119.aa
NeoGfMa1|356987	1-596:2927.0	2927	0	596	1	542	0.9094	664796 No KEGG functional class	1	596	jgi|NeoGfMa1|356987|estExt_Genewise1.C_7_t30303	1	596	Neocallimastix sp. Gf-Ma3-1 v1.0	NeoGfMa1_GeneCatalog_proteins_20201119.aa
Piromy_p0_1|488393	387-585:771.0 188-339:510.0 343-387:175.0 42-74:65.0 71-96:56.0	1577	0	455	0.5556	279	0.6132	665007 No KEGG functional class	42	585	jgi|Piromy_p0_1|488393|estExt_Genemark4.C_chromosome_10_t10125	89	712	Piromyces sp. UH3-1 v2.0	Piromy_p0_1_GeneCatalog_proteins_20200513.aa
Piromy_p0_1|456688	343-585:967.0 188-314:472.0 14-73:84.0 316-332:65.0 124-168:56.0	1644	0	492	0.6252	292	0.5935	665007 No KEGG functional class	14	585	jgi|Piromy_p0_1|456688|estExt_fgenesh1_pm.C_chromosome_9_t30018	62	649	Piromyces sp. UH3-1 v2.0	Piromy_p0_1_GeneCatalog_proteins_20200513.aa
Piromy_p0_1|434642	316-585:1032.0 174-314:540.0 128-176:70.0 71-96:52.0	1694	0	486	0.5927	308	0.6337	665007 No KEGG functional class	71	585	jgi|Piromy_p0_1|434642|fgenesh1_pm.chromosome_9_#_1017	123	674	Piromyces sp. UH3-1 v2.0	Piromy_p0_1_GeneCatalog_proteins_20200513.aa
Pecora1|15830	342-585:981.0 188-314:485.0 12-73:98.0 73-96:60.0 148-168:60.0 316-332:56.0	1740	0	495	0.5796	304	0.6141	665007 No KEGG functional class	12	585	jgi|Pecora1|15830|allA16511	60	682	Pecoramyces sp. F1	Pecora1_ExternalModels_proteins_2021-11-19.fasta
Pecora1|13580	386-585:783.0 184-342:553.0 343-386:168.0 43-74:80.0 74-98:69.0	1653	0	460	0.5583	297	0.6457	665007 No KEGG functional class	43	585	jgi|Pecora1|13580|allA14074	91	715	Pecoramyces sp. F1	Pecora1_ExternalModels_proteins_2021-11-19.fasta
Neosp1|665007	1-611:3158.0 628-641:78.0	3236	0	625	0.947	613	0.9808	665007 No KEGG functional class	1	641	jgi|Neosp1|665007|estExt_fgenesh1_pg.C_170025	1	641	Neocallimastix californiae G1 v1.0	Neosp1_GeneCatalog_proteins_20170918.aa
Neosp1|459188	342-585:990.0 188-316:491.0 44-73:80.0 71-96:65.0 316-332:59.0	1685	0	446	0.6068	291	0.6525	665007 No KEGG functional class	44	585	jgi|Neosp1|459188|estExt_Genewise1Plus.C_1380073	1	585	Neocallimastix californiae G1 v1.0	Neosp1_GeneCatalog_proteins_20170918.aa
Neosp1|399205	244-611:1763.0 628-637:55.0	1818	0	378	0.877	339	0.8968	665007 No KEGG functional class	244	637	jgi|Neosp1|399205|e_gw1.17.300.1	1	412	Neocallimastix californiae G1 v1.0	Neosp1_GeneCatalog_proteins_20170918.aa
Neosp1|250107	386-585:764.0 188-339:523.0 343-386:153.0 45-95:90.0	1530	0	447	0.5418	277	0.6197	665007 No KEGG functional class	45	585	jgi|Neosp1|250107|CE250106_130	92	722	Neocallimastix californiae G1 v1.0	Neosp1_GeneCatalog_proteins_20170918.aa
Neosp1|77673	266-611:1701.0 628-641:78.0	1779	0	360	0.9114	330	0.9167	665007 No KEGG functional class	266	641	jgi|Neosp1|77673|CE77672_3189	1	376	Neocallimastix californiae G1 v1.0	Neosp1_GeneCatalog_proteins_20170918.aa
Piromy_p0_1|547486	224-574:1305.0 58-207:583.0 3-56:166.0	2054	0	555	0.9098	363	0.6541	665454 No KEGG functional class	3	574	jgi|Piromy_p0_1|547486|fgenesh2_kg.chromosome_12___1665___TRINITY_DN8544_c4_g3_i2	1	571	Piromyces sp. UH3-1 v2.0	Piromy_p0_1_GeneCatalog_proteins_20200513.aa
Pecora1|506	224-552:1388.0 95-207:493.0 3-98:405.0 555-574:64.0	2350	0	558	0.9058	422	0.7563	665454 No KEGG functional class	3	574	jgi|Pecora1|506|allA00456	1	576	Pecoramyces sp. F1	Pecora1_ExternalModels_proteins_2021-11-19.fasta
NeoWI3_1|751216	224-601:1886.0 1-207:992.0	2878	0	585	0.8864	538	0.9197	665454 No KEGG functional class	1	601	jgi|NeoWI3_1|751216|estExt_Genemark4.C_2_t20367	1	601	Neocallimastix sp. WI3-B v1.0	NeoWI3_1_GeneCatalog_proteins_20201119.aa
NeoWI3_1|41850	224-550:1410.0 3-207:898.0 555-574:59.0 590-606:53.0	2420	0	569	0.9343	438	0.7698	665454 No KEGG functional class	3	606	jgi|NeoWI3_1|41850|CE41849_22768	1	596	Neocallimastix sp. WI3-B v1.0	NeoWI3_1_GeneCatalog_proteins_20201119.aa
Neosp1|665454	224-607:2050.0 1-207:1059.0	3109	0	591	0.9548	591	1	665454 No KEGG functional class	1	607	jgi|Neosp1|665454|estExt_fgenesh1_pg.C_210015	1	607	Neocallimastix californiae G1 v1.0	Neosp1_GeneCatalog_proteins_20170918.aa
Neosp1|501967	224-552:1423.0 3-207:901.0 555-581:67.0 593-606:44.0	2435	0	575	0.9442	443	0.7704	665454 No KEGG functional class	3	606	jgi|Neosp1|501967|fgenesh1_pg.24_#_42	1	596	Neocallimastix californiae G1 v1.0	Neosp1_GeneCatalog_proteins_20170918.aa
Neolan1|1431162	224-607:2050.0 1-207:1059.0	3109	0	591	0.9548	591	1	665454 No KEGG functional class	1	607	jgi|Neolan1|1431162|estExt_Genemark4.C_950127	1	607	Neocallimastix lanati v1.0	Neolan1_GeneCatalog_proteins_20200610.aa
Neolan1|365949	224-552:1423.0 3-207:901.0 555-581:67.0 593-606:44.0	2435	0	575	0.923	443	0.7704	665454 No KEGG functional class	3	606	jgi|Neolan1|365949|CE365948_97240	1	596	Neocallimastix lanati v1.0	Neolan1_GeneCatalog_proteins_20200610.aa
NeoGfMa1|503782	224-601:1886.0 1-207:992.0	2878	0	585	0.8864	538	0.9197	665454 No KEGG functional class	1	601	jgi|NeoGfMa1|503782|gm4.2775_g	1	601	Neocallimastix sp. Gf-Ma3-1 v1.0	NeoGfMa1_GeneCatalog_proteins_20201119.aa
NeoGfMa1|301431	224-550:1410.0 3-207:898.0 555-569:57.0 590-606:53.0	2418	0	564	0.9261	437	0.7748	665454 No KEGG functional class	3	606	jgi|NeoGfMa1|301431|e_gw1.5.1595.1	1	596	Neocallimastix sp. Gf-Ma3-1 v1.0	NeoGfMa1_GeneCatalog_proteins_20201119.aa
Pecora1|12950	22-186:718.0 187-216:96.0	814	1.92e-99	195	0.8864	147	0.7538	665714 No KEGG functional class	22	216	jgi|Pecora1|12950|allA13425	21	216	Pecoramyces sp. F1	Pecora1_ExternalModels_proteins_2021-11-19.fasta
Orpsp1_1|1189337	22-186:718.0 187-216:96.0	814	1.61e-99	195	0.8904	147	0.7538	665714 No KEGG functional class	22	216	jgi|Orpsp1_1|1189337|evm.model.d7180000071245.1	21	216	Orpinomyces sp.	Orpsp1_1_GeneCatalog_proteins_20140826.aa
NeoWI3_1|908170	1-185:896.0 183-219:133.0	1029	6.65e-129	222	1.0091	191	0.8604	665714 No KEGG functional class	1	219	jgi|NeoWI3_1|908170|fgenesh2_kg.14___284___TRINITY_DN12513_c0_g2_i1	1	220	Neocallimastix sp. WI3-B v1.0	NeoWI3_1_GeneCatalog_proteins_20201119.aa
NeoWI3_1|751199	1-211:832.0	832	3.09e-107	211	0.591	153	0.7251	665714 No KEGG functional class	1	211	jgi|NeoWI3_1|751199|estExt_Genemark4.C_2_t20332	1	211	Neocallimastix sp. WI3-B v1.0	NeoWI3_1_GeneCatalog_proteins_20201119.aa
Neosp1|709568	1-183:813.0 197-219:47.0	860	9.89e-106	206	0.9279	157	0.7621	665714 No KEGG functional class	1	219	jgi|Neosp1|709568|fgenesh2_kg.565_#_2_#_Locus3050v1rpkm24.50	1	222	Neocallimastix californiae G1 v1.0	Neosp1_GeneCatalog_proteins_20170918.aa
Neosp1|665714	1-219:1089.0	1089	5.09e-143	219	1	206	0.9406	665714 No KEGG functional class	1	219	jgi|Neosp1|665714|estExt_fgenesh1_pg.C_240017	1	219	Neocallimastix californiae G1 v1.0	Neosp1_GeneCatalog_proteins_20170918.aa
Neolan1|1713022	1-183:813.0 197-219:47.0	860	1.33e-105	206	0.9279	157	0.7621	665714 No KEGG functional class	1	219	jgi|Neolan1|1713022|fgenesh2_kg.95___471___TRINITY_DN1433_c2_g1_i1	1	222	Neocallimastix lanati v1.0	Neolan1_GeneCatalog_proteins_20200610.aa
Neolan1|1669692	1-219:1089.0	1089	6.86e-143	219	1	206	0.9406	665714 No KEGG functional class	1	219	jgi|Neolan1|1669692|fgenesh2_kg.36___475___TRINITY_DN1433_c2_g1_i2	1	219	Neocallimastix lanati v1.0	Neolan1_GeneCatalog_proteins_20200610.aa
NeoGfMa1|716707	1-211:832.0	832	3.13e-107	211	0.9591	153	0.7251	665714 No KEGG functional class	1	211	jgi|NeoGfMa1|716707|fgenesh2_kg.21___422___TRINITY_DN11492_c13_g1_i1	1	211	Neocallimastix sp. Gf-Ma3-1 v1.0	NeoGfMa1_GeneCatalog_proteins_20201119.aa
NeoGfMa1|106494	1-185:896.0 183-219:133.0	1029	6.73e-129	222	1.0091	191	0.8604	665714 No KEGG functional class	1	219	jgi|NeoGfMa1|106494|CE106493_290	1	220	Neocallimastix sp. Gf-Ma3-1 v1.0	NeoGfMa1_GeneCatalog_proteins_20201119.aa
Piromy_p0_1|545808	457-621:489.0 260-453:484.0 193-255:218.0 1-80:182.0 620-678:165.0 88-113:96.0 130-198:90.0	1724	0	656	0.9175	311	0.4741	665879 No KEGG functional class	1	678	jgi|Piromy_p0_1|545808|fgenesh2_kg.chromosome_11___1658___TRINITY_DN8905_c2_g1_i1	1	679	Piromyces sp. UH3-1 v2.0	Piromy_p0_1_GeneCatalog_proteins_20200513.aa
Pecora1|13133	353-453:378.0 497-621:325.0 260-353:261.0 199-255:179.0 620-678:172.0 1-80:164.0 457-502:131.0 86-117:101.0 130-154:64.0	1775	0	619	0.7905	311	0.5024	665879 No KEGG functional class	1	678	jgi|Pecora1|13133|allA13624	1	681	Pecoramyces sp. F1	Pecora1_ExternalModels_proteins_2021-11-19.fasta
Pecora1|12508	26-683:3060.0 718-795:239.0 684-704:45.0	3344	0	757	0.9486	611	0.8071	665879 No KEGG functional class	26	795	jgi|Pecora1|12508|allA12943	1	775	Pecoramyces sp. F1	Pecora1_ExternalModels_proteins_2021-11-19.fasta
Pecora1|9456	457-621:496.0 342-453:394.0 260-346:258.0 193-255:234.0 1-81:217.0 88-152:151.0 620-659:119.0 662-688:57.0	1926	0	640	0.9027	345	0.5391	665879 No KEGG functional class	1	688	jgi|Pecora1|9456|allA09692	1	685	Pecoramyces sp. F1	Pecora1_ExternalModels_proteins_2021-11-19.fasta
Neosp1|707264	454-621:501.0 342-452:376.0 260-337:252.0 193-255:219.0 1-81:189.0 620-680:161.0 88-152:147.0	1845	0	627	0.8806	330	0.5263	665879 No KEGG functional class	1	680	jgi|Neosp1|707264|fgenesh2_kg.254_#_4_#_Locus9976v1rpkm3.10	1	678	Neocallimastix californiae G1 v1.0	Neosp1_GeneCatalog_proteins_20170918.aa
Neosp1|706960	457-621:490.0 342-453:394.0 259-346:261.0 193-255:228.0 88-152:147.0 26-80:137.0 620-658:108.0 662-678:60.0	1825	0	604	0.8909	326	0.5397	665879 No KEGG functional class	26	678	jgi|Neosp1|706960|fgenesh2_kg.239_#_18_#_Locus2022v1rpkm44.31	1	650	Neocallimastix californiae G1 v1.0	Neosp1_GeneCatalog_proteins_20170918.aa
Neosp1|665879	1-823:4235.0	4235	0	823	1	798	0.9696	665879 No KEGG functional class	1	823	jgi|Neosp1|665879|estExt_fgenesh1_pg.C_250091	1	823	Neocallimastix californiae G1 v1.0	Neosp1_GeneCatalog_proteins_20170918.aa
Neosp1|388102	1-683:2854.0	2854	0	683	0.9552	514	0.7526	665879 No KEGG functional class	1	683	jgi|Neosp1|388102|estExt_Genewise1.C_1860039	1	683	Neocallimastix californiae G1 v1.0	Neosp1_GeneCatalog_proteins_20170918.aa
Neosp1|382852	278-452:519.0 457-621:455.0 194-255:174.0 16-80:158.0 620-659:120.0 88-117:109.0 259-283:65.0 130-151:62.0 663-677:52.0 168-200:48.0	1762	0	632	0.8852	309	0.4889	665879 No KEGG functional class	16	677	jgi|Neosp1|382852|estExt_Genewise1.C_860009	17	673	Neocallimastix californiae G1 v1.0	Neosp1_GeneCatalog_proteins_20170918.aa
Neosp1|56299	282-452:532.0 505-621:332.0 15-80:171.0 187-252:169.0 620-659:130.0 457-492:119.0 88-116:109.0 259-283:69.0 130-151:62.0 663-678:54.0	1747	0	588	0.8473	315	0.5357	665879 No KEGG functional class	15	678	jgi|Neosp1|56299|CE56298_13521	16	675	Neocallimastix californiae G1 v1.0	Neosp1_GeneCatalog_proteins_20170918.aa
Piromy_p0_1|444213	193-311:478.0 117-190:304.0 18-113:301.0 318-395:266.0 568-609:138.0 395-443:85.0 484-506:83.0 539-562:76.0 524-536:63.0 443-453:50.0 524-562:129.0	1973	0	568	0.9342	332	0.5845	666197 No KEGG functional class	18	609	jgi|Piromy_p0_1|444213|estExt_fgenesh1_pg.C_chromosome_6_t30137	13	608	Piromyces sp. UH3-1 v2.0	Piromy_p0_1_GeneCatalog_proteins_20200513.aa
Piromy_p0_1|350521	11-189:604.0 193-308:454.0 320-445:309.0 567-609:128.0 482-508:91.0 543-565:79.0 524-536:69.0 443-471:45.0 524-563:140.0	1919	0	596	0.9597	336	0.5638	666197 No KEGG functional class	11	609	jgi|Piromy_p0_1|350521|estExt_Genewise1Plus.C_chromosome_4_t90163	6	621	Piromyces sp. UH3-1 v2.0	Piromy_p0_1_GeneCatalog_proteins_20200513.aa
Pecora1|7482	195-414:919.0 38-190:648.0 524-601:323.0 414-509:235.0 558-613:141.0 524-552:121.0	2387	0	632	1.1088	423	0.6693	666197 No KEGG functional class	38	613	jgi|Pecora1|7482|allA07650	1	563	Pecoramyces sp. F1	Pecora1_ExternalModels_proteins_2021-11-19.fasta
Pecora1|2632	11-188:623.0 193-310:475.0 315-445:352.0 565-601:103.0 484-508:86.0 543-562:81.0 523-536:71.0 443-462:44.0	1835	0	543	0.8633	317	0.5838	666197 No KEGG functional class	11	601	jgi|Pecora1|2632|allA02617	6	628	Pecoramyces sp. F1	Pecora1_ExternalModels_proteins_2021-11-19.fasta
Neosp1|675862	19-189:576.0 258-445:565.0 191-257:230.0 565-609:145.0 538-562:91.0 484-508:87.0 524-536:67.0 442-471:51.0 524-562:133.0 583-609:98.0 571-582:46.0	2089	0	642	1.0388	363	0.5654	666197 No KEGG functional class	19	609	jgi|Neosp1|675862|estExt_fgenesh1_pg.C_2470005	8	617	Neocallimastix californiae G1 v1.0	Neosp1_GeneCatalog_proteins_20170918.aa
Neosp1|669624	11-189:650.0 193-314:427.0 328-445:370.0 569-609:127.0 541-565:94.0 482-506:76.0 524-535:64.0 443-453:43.0 523-562:110.0 586-610:95.0 569-582:47.0	2103	0	612	0.9653	362	0.5915	666197 No KEGG functional class	11	610	jgi|Neosp1|669624|estExt_fgenesh1_pg.C_770050	6	634	Neocallimastix californiae G1 v1.0	Neosp1_GeneCatalog_proteins_20170918.aa
Neosp1|666197	1-614:3218.0 559-614:151.0 524-567:150.0	3519	0	714	1.1629	638	0.8936	666197 No KEGG functional class	1	614	jgi|Neosp1|666197|estExt_fgenesh1_pg.C_290006	1	614	Neocallimastix californiae G1 v1.0	Neosp1_GeneCatalog_proteins_20170918.aa
Neosp1|392622	196-311:470.0 11-113:302.0 117-188:299.0 318-395:253.0 567-609:144.0 399-453:117.0 484-506:83.0 539-558:69.0 524-535:61.0 524-562:134.0	1932	0	561	0.9197	329	0.5865	666197 No KEGG functional class	11	609	jgi|Neosp1|392622|estExt_Genewise1.C_4030005	6	610	Neocallimastix californiae G1 v1.0	Neosp1_GeneCatalog_proteins_20170918.aa
Neosp1|392363	193-311:431.0 76-190:412.0 317-392:255.0 565-609:151.0 14-67:142.0 482-508:96.0 539-558:92.0 395-443:86.0 524-536:68.0 443-453:51.0 524-562:127.0	1911	0	568	0.9327	321	0.5651	666197 No KEGG functional class	14	609	jgi|Neosp1|392363|estExt_Genewise1.C_3780025	9	608	Neocallimastix californiae G1 v1.0	Neosp1_GeneCatalog_proteins_20170918.aa
Neosp1|385759	116-509:1615.0 524-609:388.0 38-115:310.0 524-562:158.0 567-609:143.0	2614	0	640	1.0959	462	0.7219	666197 No KEGG functional class	38	609	jgi|Neosp1|385759|estExt_Genewise1.C_1290038	1	584	Neocallimastix californiae G1 v1.0	Neosp1_GeneCatalog_proteins_20170918.aa
Piromy_p0_1|487601	127-501:1346.0 58-127:261.0 505-547:133.0 19-37:73.0	1813	0	507	0.8741	315	0.6213	667048 No KEGG functional class	19	547	jgi|Piromy_p0_1|487601|estExt_Genemark4.C_chromosome_9_t30320	55	579	Piromyces sp. UH3-1 v2.0	Piromy_p0_1_GeneCatalog_proteins_20200513.aa
PirE2_1|7128	127-545:1395.0 64-118:184.0 40-64:84.0 19-47:67.0	1730	0	528	0.6608	302	0.572	667048 No KEGG functional class	19	545	jgi|PirE2_1|7128|gm1.6074_g	54	576	Piromyces sp. E2 v1.0	PirE2_1_GeneCatalog_proteins_20110421.aa
PirE2_1|7127	133-548:1389.0 64-119:197.0 38-64:93.0	1679	0	499	0.6671	292	0.5852	667048 No KEGG functional class	38	548	jgi|PirE2_1|7127|gm1.6073_g	9	514	Piromyces sp. E2 v1.0	PirE2_1_GeneCatalog_proteins_20110421.aa
PirE2_1|3209	126-290:488.0 399-547:395.0 289-396:349.0 59-122:216.0 1-35:94.0	1542	0	521	0.8983	284	0.5451	667048 No KEGG functional class	1	547	jgi|PirE2_1|3209|gm1.2155_g	1	543	Piromyces sp. E2 v1.0	PirE2_1_GeneCatalog_proteins_20110421.aa
PirE2_1|3205	127-548:1424.0 85-119:114.0	1538	0	457	0.9177	266	0.5821	667048 No KEGG functional class	85	548	jgi|PirE2_1|3205|gm1.2151_g	1	463	Piromyces sp. E2 v1.0	PirE2_1_GeneCatalog_proteins_20110421.aa
Neosp1|667048	1-548:2920.0	2920	0	548	1	548	1	667048 No KEGG functional class	1	548	jgi|Neosp1|667048|estExt_fgenesh1_pg.C_380099	1	548	Neocallimastix californiae G1 v1.0	Neosp1_GeneCatalog_proteins_20170918.aa
Caecom1|524819	258-476:612.0 122-256:441.0 19-123:298.0 476-548:155.0	1506	0	532	0.8793	266	0.5	667048 No KEGG functional class	19	548	jgi|Caecom1|524819|estExt_fgenesh1_pg.C_760006	54	585	Caecomyces churrovis A v1.0	Caecom1_GeneCatalog_proteins_20171213.aa
Caecom1|450177	123-548:2009.0 19-124:503.0 1-18:59.0	2571	0	550	0.945	468	0.8509	667048 No KEGG functional class	1	548	jgi|Caecom1|450177|fgenesh1_kg.76_#_4_#_TRINITY_DN7763_c1_g2_i1	1	582	Caecomyces churrovis A v1.0	Caecom1_GeneCatalog_proteins_20171213.aa
Anasp1|291148	256-546:919.0 122-260:491.0 38-125:307.0	1717	0	518	0.5893	294	0.5676	667048 No KEGG functional class	38	546	jgi|Anasp1|291148|estExt_Genemark1.C_470004	74	581	Anaeromyces robustus v1.0	Anasp1_GeneCatalog_proteins_20160330.aa
Anasp1|246451	256-548:927.0 122-260:489.0 38-125:298.0	1714	0	520	0.7939	295	0.5673	667048 No KEGG functional class	38	548	jgi|Anasp1|246451|fgenesh1_pg.178_#_16	74	584	Anaeromyces robustus v1.0	Anasp1_GeneCatalog_proteins_20160330.aa
Piromy_p0_1|321586	705-885:515.0 497-627:371.0 394-501:249.0 323-400:178.0 267-316:99.0 670-697:88.0 631-668:86.0 184-227:62.0 233-277:65.0 559-601:60.0 185-233:57.0 606-645:49.0 139-158:48.0	1927	0	855	0.4222	349	0.4082	667057 No KEGG functional class	139	885	jgi|Piromy_p0_1|321586|estExt_Genewise1.C_chromosome_5_t60220	466	1534	Piromyces sp. UH3-1 v2.0	Piromy_p0_1_GeneCatalog_proteins_20200513.aa
PirE2_1|10347	703-882:517.0 497-628:375.0 394-501:233.0 323-400:179.0 267-316:100.0 670-701:89.0 630-668:79.0 199-227:57.0 137-171:50.0 177-192:42.0 186-231:64.0 233-277:64.0 551-601:58.0 606-646:52.0 294-315:48.0	2007	0	904	0.5806	355	0.3927	667057 No KEGG functional class	137	882	jgi|PirE2_1|10347|gm1.9293_g	426	1533	Piromyces sp. E2 v1.0	PirE2_1_GeneCatalog_proteins_20110421.aa
Pecora1|5167	318-904:2726.0 137-271:449.0 276-320:191.0 88-116:97.0 64-86:43.0 193-214:91.0 242-284:61.0 1-29:60.0 418-460:55.0	3773	0	956	1.0391	700	0.7322	667057 No KEGG functional class	1	904	jgi|Pecora1|5167|allA05625	1	919	Pecoramyces sp. F1	Pecora1_ExternalModels_proteins_2021-11-19.fasta
Pecora1|3188	493-637:456.0 701-819:286.0 394-501:275.0 813-882:262.0 323-400:165.0 670-702:109.0 277-316:75.0 643-666:65.0 601-646:76.0 242-287:74.0 209-233:64.0 684-697:54.0 506-529:46.0	2007	0	772	0.588	343	0.4443	667057 No KEGG functional class	209	882	jgi|Pecora1|3188|allA03197	579	1311	Pecoramyces sp. F1	Pecora1_ExternalModels_proteins_2021-11-19.fasta
Neosp1|668559	319-904:2724.0 231-315:322.0 138-196:199.0 89-121:97.0 213-236:80.0 197-214:79.0 1-29:70.0 48-92:66.0	3637	0	879	0.9788	674	0.7668	667057 No KEGG functional class	1	904	jgi|Neosp1|668559|estExt_fgenesh1_pg.C_600021	1	898	Neocallimastix californiae G1 v1.0	Neosp1_GeneCatalog_proteins_20170918.aa
Neosp1|667057	1-904:4619.0	4619	0	904	1	877	0.9701	667057 No KEGG functional class	1	904	jgi|Neosp1|667057|estExt_fgenesh1_pg.C_380115	1	904	Neocallimastix californiae G1 v1.0	Neosp1_GeneCatalog_proteins_20170918.aa
Caecom1|543387	322-904:2666.0 137-199:172.0 276-314:164.0 231-272:141.0 197-212:75.0 217-230:63.0 87-111:61.0	3342	0	782	0.8556	608	0.7775	667057 No KEGG functional class	87	904	jgi|Caecom1|543387|gm1.1175_g	103	914	Caecomyces churrovis A v1.0	Caecom1_GeneCatalog_proteins_20171213.aa
Caecom1|447911	495-638:464.0 701-809:277.0 396-501:265.0 813-904:255.0 323-400:150.0 670-702:107.0 636-667:82.0 276-313:70.0 237-287:87.0 601-646:65.0 194-231:50.0 684-697:50.0 145-171:47.0 506-529:47.0	2016	0	832	0.6181	351	0.4219	667057 No KEGG functional class	145	904	jgi|Caecom1|447911|fgenesh1_kg.46_#_25_#_TRINITY_DN4975_c0_g2_i1	547	1342	Caecomyces churrovis A v1.0	Caecom1_GeneCatalog_proteins_20171213.aa
Anasp1|294287	238-904:2935.0 156-185:111.0 190-214:76.0 217-235:65.0 57-106:53.0 138-157:53.0 248-318:87.0 418-460:64.0 1-15:45.0	3489	0	940	1.0444	642	0.683	667057 No KEGG functional class	1	904	jgi|Anasp1|294287|estExt_Genemark1.C_1670001	1	900	Anaeromyces robustus v1.0	Anasp1_GeneCatalog_proteins_20160330.aa
Anasp1|270788	705-882:552.0 497-628:405.0 396-501:282.0 323-399:172.0 185-289:109.0 674-701:90.0 636-674:83.0	1693	0	665	0.4141	300	0.4511	667057 No KEGG functional class	185	882	jgi|Anasp1|270788|estExt_fgenesh1_pg.C_2590006	768	1579	Anaeromyces robustus v1.0	Anasp1_GeneCatalog_proteins_20160330.aa
Piromy_p0_1|442080	76-178:253.0 182-281:244.0 279-330:120.0 338-370:86.0 22-58:85.0 375-404:69.0	857	6.61e-86	355	0.4778	163	0.4592	667374 No KEGG functional class	22	404	jgi|Piromy_p0_1|442080|estExt_fgenesh1_pg.C_chromosome_4_t50078	9	391	Piromyces sp. UH3-1 v2.0	Piromy_p0_1_GeneCatalog_proteins_20200513.aa
Pecora1|14933	444-678:821.0 679-705:75.0	896	6.73e-110	262	0.9776	169	0.645	667374 No KEGG functional class	444	705	jgi|Pecora1|14933|allA15519	1	267	Pecoramyces sp. F1	Pecora1_ExternalModels_proteins_2021-11-19.fasta
Orpsp1_1|1179072	76-270:546.0 276-331:144.0 18-60:84.0 329-366:77.0	851	3.74e-94	332	0.9459	160	0.4819	667374 No KEGG functional class	18	366	jgi|Orpsp1_1|1179072|evm.model.c7180000067823.1	1	351	Orpinomyces sp.	Orpsp1_1_GeneCatalog_proteins_20140826.aa
Orpsp1_1|1174853	31-270:614.0 329-407:179.0 276-331:144.0	937	1.16e-110	375	0.9236	177	0.472	667374 No KEGG functional class	31	407	jgi|Orpsp1_1|1174853|evm.model.c7180000051687.1	15	391	Orpinomyces sp.	Orpsp1_1_GeneCatalog_proteins_20140826.aa
NeoWI3_1|468568	76-266:479.0 340-408:146.0 284-337:105.0 41-60:54.0	784	1.05e-84	334	0.7952	149	0.4461	667374 No KEGG functional class	41	408	jgi|NeoWI3_1|468568|e_gw1.6.543.1	25	389	Neocallimastix sp. WI3-B v1.0	NeoWI3_1_GeneCatalog_proteins_20201119.aa
Neosp1|667374	15-706:3412.0	3412	0	692	0.9802	662	0.9566	667374 No KEGG functional class	15	706	jgi|Neosp1|667374|estExt_fgenesh1_pg.C_420090	15	706	Neocallimastix californiae G1 v1.0	Neosp1_GeneCatalog_proteins_20170918.aa
Neolan1|1737451	15-706:3412.0	3412	0	692	0.9802	662	0.9566	667374 No KEGG functional class	15	706	jgi|Neolan1|1737451|fgenesh2_kg.150___67___TRINITY_DN445_c7_g1_i1	15	706	Neocallimastix lanati v1.0	Neolan1_GeneCatalog_proteins_20200610.aa
NeoGfMa1|581565	76-266:479.0 340-408:146.0 284-337:105.0 41-60:54.0	784	1.06e-84	334	0.7859	149	0.4461	667374 No KEGG functional class	41	408	jgi|NeoGfMa1|581565|estExt_fgenesh1_pg.C_6_t10086	30	394	Neocallimastix sp. Gf-Ma3-1 v1.0	NeoGfMa1_GeneCatalog_proteins_20201119.aa
Caecom1|102216	76-267:560.0 306-407:246.0 20-58:91.0 76-234:467.0 41-60:51.0 279-333:139.0	1554	3.76e-105	567	0.7043	295	0.5203	667374 No KEGG functional class	20	407	jgi|Caecom1|102216|CE102215_489	18	796	Caecomyces churrovis A v1.0	Caecom1_GeneCatalog_proteins_20171213.aa
Anasp1|291429	79-249:470.0 253-330:144.0 336-370:83.0 36-60:75.0 374-404:65.0	837	9.53e-88	340	0.4696	165	0.4853	667374 No KEGG functional class	36	404	jgi|Anasp1|291429|estExt_Genemark1.C_550014	26	394	Anaeromyces robustus v1.0	Anasp1_GeneCatalog_proteins_20160330.aa
Neosp1|704451	194-568:1737.0 22-192:830.0 1-19:60.0	2627	0	565	0.7474	454	0.8035	667449 No KEGG functional class	1	568	jgi|Neosp1|704451|fgenesh2_kg.137_#_8_#_Locus1266v1rpkm89.28	1	649	Neocallimastix californiae G1 v1.0	Neosp1_GeneCatalog_proteins_20170918.aa
Neosp1|703870	183-575:1819.0 1-193:962.0	2781	0	586	0.7741	487	0.8311	667449 No KEGG functional class	1	575	jgi|Neosp1|703870|fgenesh2_kg.120_#_27_#_Locus187v1rpkm1607.33	1	658	Neocallimastix californiae G1 v1.0	Neosp1_GeneCatalog_proteins_20170918.aa
Neosp1|697093	183-568:1797.0 1-192:893.0	2690	0	578	0.7666	470	0.8131	667449 No KEGG functional class	1	568	jgi|Neosp1|697093|fgenesh2_kg.4_#_80_#_Locus2069v1rpkm43.06	1	651	Neocallimastix californiae G1 v1.0	Neosp1_GeneCatalog_proteins_20170918.aa
Neosp1|216560	183-574:1896.0 40-193:797.0	2693	0	546	0.7604	472	0.8645	667449 No KEGG functional class	40	574	jgi|Neosp1|216560|CE216559_499367	1	618	Neocallimastix californiae G1 v1.0	Neosp1_GeneCatalog_proteins_20170918.aa
Caecom1|625070	194-575:1686.0 1-192:881.0	2567	0	574	0.4614	439	0.7648	667449 No KEGG functional class	1	575	jgi|Caecom1|625070|estExt_Genemark1.C_2400020	1	658	Caecomyces churrovis A v1.0	Caecom1_GeneCatalog_proteins_20171213.aa
Caecom1|623630	194-570:1735.0 1-192:865.0	2600	0	569	0.7438	446	0.7838	667449 No KEGG functional class	1	570	jgi|Caecom1|623630|estExt_Genemark1.C_1550016	1	653	Caecomyces churrovis A v1.0	Caecom1_GeneCatalog_proteins_20171213.aa
Caecom1|621773	194-423:1157.0 425-568:569.0 125-192:327.0 71-124:254.0 23-62:165.0 1-23:87.0	2559	0	559	0.7524	442	0.7907	667449 No KEGG functional class	1	568	jgi|Caecom1|621773|estExt_Genemark1.C_780029	1	631	Caecomyces churrovis A v1.0	Caecom1_GeneCatalog_proteins_20171213.aa
Caecom1|417587	194-422:1146.0 13-192:806.0 420-568:625.0	2577	0	558	0.742	447	0.8011	667449 No KEGG functional class	13	568	jgi|Caecom1|417587|estExt_Genewise1.C_780013	12	647	Caecomyces churrovis A v1.0	Caecom1_GeneCatalog_proteins_20171213.aa
Caecom1|400904	194-423:1142.0 23-192:804.0 425-568:560.0 1-24:87.0	2593	0	568	0.7415	448	0.7887	667449 No KEGG functional class	1	568	jgi|Caecom1|400904|e_gw1.78.19.1	1	648	Caecomyces churrovis A v1.0	Caecom1_GeneCatalog_proteins_20171213.aa
Caecom1|162374	194-572:1752.0 1-192:894.0	2646	0	571	0.7769	462	0.8091	667449 No KEGG functional class	1	572	jgi|Caecom1|162374|CE162373_4247	1	655	Caecomyces churrovis A v1.0	Caecom1_GeneCatalog_proteins_20171213.aa
Pecora1|16183	91-378:1010.0 496-561:174.0 381-419:160.0 446-493:148.0 419-446:84.0	1576	0	469	0.7949	276	0.5885	667495 No KEGG functional class	91	561	jgi|Pecora1|16183|allA16896	81	541	Pecoramyces sp. F1	Pecora1_ExternalModels_proteins_2021-11-19.fasta
Pecora1|8261	73-266:847.0 424-554:529.0 266-371:460.0 382-427:191.0 19-93:182.0	2209	0	552	0.7032	395	0.7156	667495 No KEGG functional class	19	554	jgi|Pecora1|8261|allA08442	19	543	Pecoramyces sp. F1	Pecora1_ExternalModels_proteins_2021-11-19.fasta
Pecora1|5310	265-597:1498.0 20-266:1176.0	2674	0	580	0.928	481	0.8293	667495 No KEGG functional class	20	597	jgi|Pecora1|5310|allA05382	20	598	Pecoramyces sp. F1	Pecora1_ExternalModels_proteins_2021-11-19.fasta
Pecora1|4471	267-426:697.0 80-264:687.0 425-557:481.0 37-78:87.0 20-30:45.0	1997	0	531	0.8939	348	0.6554	667495 No KEGG functional class	20	557	jgi|Pecora1|4471|allA04508	20	557	Pecoramyces sp. F1	Pecora1_ExternalModels_proteins_2021-11-19.fasta
Neosp1|677280	152-265:483.0 261-378:368.0 380-442:253.0 506-561:168.0 90-143:156.0 451-492:143.0 66-78:43.0	1614	0	460	0.7757	286	0.6217	667495 No KEGG functional class	66	561	jgi|Neosp1|677280|estExt_fgenesh1_pg.C_3240001	60	544	Neocallimastix californiae G1 v1.0	Neosp1_GeneCatalog_proteins_20170918.aa
Neosp1|676946	267-426:700.0 77-264:679.0 425-557:463.0 37-74:75.0 20-32:42.0	1959	0	532	0.8941	347	0.6523	667495 No KEGG functional class	20	557	jgi|Neosp1|676946|estExt_fgenesh1_pg.C_3010006	20	557	Neocallimastix californiae G1 v1.0	Neosp1_GeneCatalog_proteins_20170918.aa
Neosp1|670950	65-264:680.0 267-426:679.0 425-556:455.0 18-30:46.0	1860	0	505	0.8502	328	0.6495	667495 No KEGG functional class	18	556	jgi|Neosp1|670950|estExt_fgenesh1_pg.C_1000091	18	556	Neocallimastix californiae G1 v1.0	Neosp1_GeneCatalog_proteins_20170918.aa
Neosp1|667495	15-601:3178.0	3178	0	587	0.9514	587	1	667495 No KEGG functional class	15	601	jgi|Neosp1|667495|estExt_fgenesh1_pg.C_440082	15	601	Neocallimastix californiae G1 v1.0	Neosp1_GeneCatalog_proteins_20170918.aa
Caecom1|550796	265-426:762.0 121-266:712.0 425-584:655.0 25-64:145.0 80-109:124.0	2398	0	538	0.8967	429	0.7974	667495 No KEGG functional class	25	584	jgi|Caecom1|550796|gm1.8584_g	27	561	Caecomyces churrovis A v1.0	Caecom1_GeneCatalog_proteins_20171213.aa
Caecom1|420155	267-424:660.0 151-264:498.0 426-556:485.0 84-146:197.0 37-78:84.0	1924	0	508	0.8596	340	0.6693	667495 No KEGG functional class	37	556	jgi|Caecom1|420155|estExt_Genewise1.C_1890012	36	555	Caecomyces churrovis A v1.0	Caecom1_GeneCatalog_proteins_20171213.aa
Piromy_p0_1|519382	393-584:670.0 193-319:423.0 71-194:306.0 323-390:260.0 1-65:146.0	1805	0	576	0.9697	336	0.5833	667575 No KEGG functional class	1	584	jgi|Piromy_p0_1|519382|fgenesh2_kg.chromosome_1___1021___TRINITY_DN8096_c0_g1_i1	3	593	Piromyces sp. UH3-1 v2.0	Piromy_p0_1_GeneCatalog_proteins_20200513.aa
Pecora1|2662	48-312:1127.0 393-587:843.0 316-385:315.0	2285	0	530	0.9689	406	0.766	667575 No KEGG functional class	48	587	jgi|Pecora1|2662|allA02706	1	546	Pecoramyces sp. F1	Pecora1_ExternalModels_proteins_2021-11-19.fasta
NeoWI3_1|867411	1-588:2893.0	2893	0	588	1	532	0.9048	667575 No KEGG functional class	1	588	jgi|NeoWI3_1|867411|MIX50520_3_9	1	588	Neocallimastix sp. WI3-B v1.0	NeoWI3_1_GeneCatalog_proteins_20201119.aa
NeoWI3_1|788274	1-275:1150.0 392-587:828.0 269-385:481.0	2459	0	588	0.9866	450	0.7653	667575 No KEGG functional class	1	587	jgi|NeoWI3_1|788274|estExt_fgenesh1_pm.C_80088	1	595	Neocallimastix sp. WI3-B v1.0	NeoWI3_1_GeneCatalog_proteins_20201119.aa
Neosp1|667575	1-588:3063.0	3063	0	588	1	575	0.9779	667575 No KEGG functional class	1	588	jgi|Neosp1|667575|estExt_fgenesh1_pg.C_460014	1	588	Neocallimastix californiae G1 v1.0	Neosp1_GeneCatalog_proteins_20170918.aa
Neosp1|664796	1-275:1137.0 392-587:815.0 269-385:480.0	2432	0	588	0.9866	448	0.7619	667575 No KEGG functional class	1	587	jgi|Neosp1|664796|estExt_fgenesh1_pg.C_150065	1	595	Neocallimastix californiae G1 v1.0	Neosp1_GeneCatalog_proteins_20170918.aa
Neolan1|1708581	1-588:3060.0	3060	0	588	1	574	0.9762	667575 No KEGG functional class	1	588	jgi|Neolan1|1708581|fgenesh2_kg.87___503___TRINITY_DN649_c1_g4_i1	1	588	Neocallimastix lanati v1.0	Neolan1_GeneCatalog_proteins_20200610.aa
Neolan1|1292719	1-275:1146.0 392-587:815.0 269-385:480.0	2441	0	588	0.9866	449	0.7636	667575 No KEGG functional class	1	587	jgi|Neolan1|1292719|estExt_fgenesh1_pm.C_530092	1	595	Neocallimastix lanati v1.0	Neolan1_GeneCatalog_proteins_20200610.aa
NeoGfMa1|415127	1-588:2893.0	2893	0	588	1	532	0.9048	667575 No KEGG functional class	1	588	jgi|NeoGfMa1|415127|estExt_Genewise1Plus.C_530149	1	588	Neocallimastix sp. Gf-Ma3-1 v1.0	NeoGfMa1_GeneCatalog_proteins_20201119.aa
NeoGfMa1|356987	1-275:1150.0 392-587:828.0 269-385:481.0	2459	0	588	0.9866	450	0.7653	667575 No KEGG functional class	1	587	jgi|NeoGfMa1|356987|estExt_Genewise1.C_7_t30303	1	595	Neocallimastix sp. Gf-Ma3-1 v1.0	NeoGfMa1_GeneCatalog_proteins_20201119.aa
Pecora1|16953	145-279:463.0 293-408:327.0 59-145:310.0 419-494:239.0 5-58:198.0 512-547:128.0	1665	0	504	0.6308	302	0.5992	667953 No KEGG functional class	5	547	jgi|Pecora1|16953|allA17749	4	541	Pecoramyces sp. F1	Pecora1_ExternalModels_proteins_2021-11-19.fasta
Pecora1|5280	148-281:445.0 290-408:349.0 58-146:344.0 5-58:189.0 419-483:179.0 512-547:132.0	1638	0	497	0.5746	290	0.5835	667953 No KEGG functional class	5	547	jgi|Pecora1|5280|allA05348	2	537	Pecoramyces sp. F1	Pecora1_ExternalModels_proteins_2021-11-19.fasta
Pecora1|803	33-286:1104.0 288-495:946.0 512-548:175.0 1-42:118.0	2343	0	541	0.7483	433	0.8004	667953 No KEGG functional class	1	548	jgi|Pecora1|803|allA00823	1	551	Pecoramyces sp. F1	Pecora1_ExternalModels_proteins_2021-11-19.fasta
Pecora1|802	145-495:1347.0 1-145:541.0 512-550:150.0	2038	0	535	0.6516	378	0.7065	667953 No KEGG functional class	1	550	jgi|Pecora1|802|allA00822	1	549	Pecoramyces sp. F1	Pecora1_ExternalModels_proteins_2021-11-19.fasta
Neosp1|708252	152-310:559.0 5-84:267.0 305-395:238.0 85-148:205.0 415-482:203.0 512-547:136.0	1608	0	498	0.685	292	0.5863	667953 No KEGG functional class	5	547	jgi|Neosp1|708252|fgenesh2_kg.321_#_2_#_Locus3122v1rpkm23.54	2	544	Neocallimastix californiae G1 v1.0	Neosp1_GeneCatalog_proteins_20170918.aa
Neosp1|667953	1-495:2574.0 512-550:203.0	2777	0	534	0.9709	534	1	667953 No KEGG functional class	1	550	jgi|Neosp1|667953|estExt_fgenesh1_pg.C_510024	1	550	Neocallimastix californiae G1 v1.0	Neosp1_GeneCatalog_proteins_20170918.aa
Neosp1|463607	145-281:459.0 295-414:317.0 58-145:301.0 419-482:216.0 1-58:205.0 512-546:97.0	1595	0	502	0.5948	289	0.5757	667953 No KEGG functional class	1	546	jgi|Neosp1|463607|estExt_Genewise1Plus.C_2730004	1	536	Neocallimastix californiae G1 v1.0	Neosp1_GeneCatalog_proteins_20170918.aa
Neosp1|330314	145-472:1251.0 74-145:237.0	1488	0	400	1.0025	268	0.67	667953 No KEGG functional class	74	472	jgi|Neosp1|330314|gw1.136.98.1	1	398	Neocallimastix californiae G1 v1.0	Neosp1_GeneCatalog_proteins_20170918.aa
Neosp1|223839	1-495:2019.0 512-547:183.0	2202	0	531	0.598	406	0.7646	667953 No KEGG functional class	1	547	jgi|Neosp1|223839|CE223838_13068	1	547	Neocallimastix californiae G1 v1.0	Neosp1_GeneCatalog_proteins_20170918.aa
Neosp1|105875	290-413:366.0 59-146:343.0 193-281:286.0 1-58:221.0 419-482:206.0 148-195:156.0 512-547:137.0	1715	0	507	0.5671	308	0.6075	667953 No KEGG functional class	1	547	jgi|Neosp1|105875|CE105874_27497	1	539	Neocallimastix californiae G1 v1.0	Neosp1_GeneCatalog_proteins_20170918.aa
Pecora1|12296	141-297:549.0 91-138:191.0 22-59:150.0 91-127:123.0 148-185:116.0 25-53:74.0 146-186:125.0 94-120:81.0 249-281:81.0 152-180:90.0 186-240:84.0 95-154:101.0 25-53:64.0	1829	2.74e-101	621	1.8933	313	0.504	668555 No KEGG functional class	22	297	jgi|Pecora1|12296|allA12713	22	326	Pecoramyces sp. F1	Pecora1_ExternalModels_proteins_2021-11-19.fasta
Pecora1|8889	131-298:463.0 90-126:159.0 24-55:105.0 91-131:125.0 148-193:111.0 20-49:78.0 145-186:116.0 95-120:70.0 201-243:68.0 249-283:42.0 149-197:95.0 249-281:69.0 204-240:61.0 95-125:101.0 25-49:66.0	1729	3.38e-79	675	1.8392	305	0.4519	668555 No KEGG functional class	20	298	jgi|Pecora1|8889|allA09085	22	342	Pecoramyces sp. F1	Pecora1_ExternalModels_proteins_2021-11-19.fasta
NeoWI3_1|753198	88-296:1096.0 19-58:189.0 153-191:109.0 242-279:83.0 95-118:81.0 93-131:109.0 148-185:84.0 23-57:72.0 249-298:85.0 155-182:83.0 95-154:84.0 25-53:71.0	2146	5.91e-160	629	1.5884	377	0.5994	668555 No KEGG functional class	19	298	jgi|NeoWI3_1|753198|estExt_Genemark4.C_6_t20336	18	330	Neocallimastix sp. WI3-B v1.0	NeoWI3_1_GeneCatalog_proteins_20201119.aa
Neosp1|673152	90-191:333.0 201-282:313.0 26-55:134.0 91-133:143.0 148-185:107.0 25-49:80.0 145-197:129.0 249-281:77.0 95-118:75.0 95-127:106.0 25-49:74.0 155-197:94.0 249-279:74.0	1739	2.7e-86	562	1.5525	287	0.5107	668555 No KEGG functional class	25	282	jgi|Neosp1|673152|estExt_fgenesh1_pg.C_1520019	26	324	Neocallimastix californiae G1 v1.0	Neosp1_GeneCatalog_proteins_20170918.aa
Neosp1|668555	88-301:1210.0 1-59:254.0 153-191:114.0 93-131:114.0 242-279:92.0 148-185:92.0 92-118:68.0 23-49:68.0 191-243:85.0 154-197:74.0 90-129:80.0 25-53:72.0	2323	0	647	2.1495	418	0.6461	668555 No KEGG functional class	1	301	jgi|Neosp1|668555|estExt_fgenesh1_pg.C_600017	1	301	Neocallimastix californiae G1 v1.0	Neosp1_GeneCatalog_proteins_20170918.aa
Neosp1|667474	201-282:313.0 141-186:163.0 91-135:154.0 26-55:133.0 90-131:155.0 148-185:108.0 25-53:76.0 95-185:137.0 191-240:71.0 155-197:104.0 249-281:76.0 205-239:59.0 95-127:105.0 25-49:69.0 249-279:82.0 95-120:74.0	1879	3.41e-79	679	2.0269	318	0.4683	668555 No KEGG functional class	25	282	jgi|Neosp1|667474|estExt_fgenesh1_pg.C_440047	26	298	Neocallimastix californiae G1 v1.0	Neosp1_GeneCatalog_proteins_20170918.aa
Neolan1|1648094	90-191:333.0 201-282:313.0 26-55:134.0 91-133:143.0 148-185:107.0 25-49:80.0 145-197:129.0 249-281:77.0 95-118:75.0 95-127:106.0 25-49:74.0 155-197:94.0 249-279:74.0	1739	3.94e-86	562	1.5027	287	0.5107	668555 No KEGG functional class	25	282	jgi|Neolan1|1648094|fgenesh2_kg.18___390___TRINITY_DN4885_c1_g1_i1	26	336	Neocallimastix lanati v1.0	Neolan1_GeneCatalog_proteins_20200610.aa
Neolan1|1639615	201-282:313.0 141-186:163.0 91-135:154.0 26-55:133.0 90-131:155.0 148-185:108.0 25-53:76.0 95-185:137.0 191-240:71.0 155-197:104.0 249-281:76.0 205-239:59.0 95-127:105.0 25-49:69.0 249-279:82.0 95-120:74.0	1879	4.63e-79	679	2.0269	318	0.4683	668555 No KEGG functional class	25	282	jgi|Neolan1|1639615|fgenesh2_kg.12___1071___TRINITY_DN5380_c0_g1_i1	26	298	Neocallimastix lanati v1.0	Neolan1_GeneCatalog_proteins_20200610.aa
Neolan1|991449	88-299:1200.0 1-59:254.0 153-191:114.0 93-131:114.0 242-279:92.0 148-185:92.0 92-118:68.0 23-49:68.0 90-129:80.0 25-53:72.0 191-243:85.0 154-182:72.0	2311	0	630	1.8639	413	0.6556	668555 No KEGG functional class	1	299	jgi|Neolan1|991449|estExt_Genewise1.C_390074	1	319	Neocallimastix lanati v1.0	Neolan1_GeneCatalog_proteins_20200610.aa
NeoGfMa1|355046	88-296:1096.0 19-58:189.0 153-191:109.0 242-279:83.0 95-118:81.0 93-131:109.0 148-185:84.0 23-57:72.0 249-298:85.0 155-182:83.0 95-154:84.0 25-53:71.0	2146	5.27e-160	629	1.7768	377	0.5994	668555 No KEGG functional class	19	298	jgi|NeoGfMa1|355046|estExt_Genewise1.C_6_t10245	18	343	Neocallimastix sp. Gf-Ma3-1 v1.0	NeoGfMa1_GeneCatalog_proteins_20201119.aa
Piromy_p0_1|431707	310-671:1491.0 666-898:1171.0 185-226:159.0 274-309:150.0 234-270:144.0 131-174:138.0 80-135:89.0 234-301:80.0 575-639:66.0 171-195:58.0	3546	0	968	1.0852	659	0.6808	668559 No KEGG functional class	80	898	jgi|Piromy_p0_1|431707|fgenesh1_pm.chromosome_5_#_683	71	892	Piromyces sp. UH3-1 v2.0	Piromy_p0_1_GeneCatalog_proteins_20200513.aa
Pecora1|5167	275-898:2976.0 133-185:219.0 227-271:186.0 192-231:161.0 81-113:97.0 1-31:105.0 575-639:65.0 230-277:60.0 187-221:51.0	3920	0	974	1.0587	732	0.7515	668559 No KEGG functional class	1	898	jgi|Pecora1|5167|allA05625	1	919	Pecoramyces sp. F1	Pecora1_ExternalModels_proteins_2021-11-19.fasta
Pecora1|3188	487-631:475.0 695-813:275.0 388-495:271.0 807-876:263.0 315-394:151.0 664-696:103.0 279-306:69.0 637-663:60.0 201-224:50.0 239-260:45.0 203-263:90.0 595-640:74.0 678-691:54.0 284-312:53.0 500-523:46.0 203-241:67.0 235-268:67.0 412-486:57.0 600-632:52.0	2322	0	1011	0.77	411	0.4065	668559 No KEGG functional class	201	876	jgi|Pecora1|3188|allA03197	204	1311	Pecoramyces sp. F1	Pecora1_ExternalModels_proteins_2021-11-19.fasta
NeoWI3_1|772178	272-898:3143.0 32-231:789.0 231-274:201.0 1-31:136.0	4269	0	902	1	800	0.8869	668559 No KEGG functional class	1	898	jgi|NeoWI3_1|772178|fgenesh1_pm.6_#_468	1	902	Neocallimastix sp. WI3-B v1.0	NeoWI3_1_GeneCatalog_proteins_20201119.aa
Neosp1|668559	1-898:4667.0	4667	0	898	1	885	0.9855	668559 No KEGG functional class	1	898	jgi|Neosp1|668559|estExt_fgenesh1_pg.C_600021	1	898	Neocallimastix californiae G1 v1.0	Neosp1_GeneCatalog_proteins_20170918.aa
Neosp1|667057	313-898:2724.0 224-308:322.0 122-193:210.0 91-123:97.0 207-230:80.0 192-209:79.0 1-29:70.0 49-93:66.0	3648	0	892	0.9867	677	0.759	668559 No KEGG functional class	1	898	jgi|Neosp1|667057|estExt_fgenesh1_pg.C_380115	1	904	Neocallimastix californiae G1 v1.0	Neosp1_GeneCatalog_proteins_20170918.aa
Neolan1|1274589	1-898:4667.0	4667	0	898	1	885	0.9855	668559 No KEGG functional class	1	898	jgi|Neolan1|1274589|fgenesh1_pm.39_#_21	1	898	Neocallimastix lanati v1.0	Neolan1_GeneCatalog_proteins_20200610.aa
Neolan1|1027601	310-898:2728.0 224-309:327.0 122-193:218.0 91-123:97.0 207-230:80.0 192-209:79.0 1-29:70.0 49-93:66.0	3665	0	896	0.9912	679	0.7578	668559 No KEGG functional class	1	898	jgi|Neolan1|1027601|estExt_Genewise1Plus.C_9_t10461	1	904	Neocallimastix lanati v1.0	Neolan1_GeneCatalog_proteins_20200610.aa
Caecom1|543387	316-898:2683.0 192-272:285.0 115-182:184.0 275-309:152.0 75-119:53.0	3357	0	812	0.8884	614	0.7562	668559 No KEGG functional class	75	898	jgi|Caecom1|543387|gm1.1175_g	89	914	Caecomyces churrovis A v1.0	Caecom1_GeneCatalog_proteins_20171213.aa
Caecom1|447911	489-632:476.0 695-803:272.0 391-495:262.0 807-898:258.0 315-394:143.0 664-696:101.0 630-663:67.0 142-168:55.0 229-241:44.0 243-283:44.0 191-224:42.0 207-256:88.0 279-326:68.0 595-640:63.0 678-691:50.0 500-523:47.0 250-287:46.0	2126	0	932	0.6924	383	0.4109	668559 No KEGG functional class	142	898	jgi|Caecom1|447911|fgenesh1_kg.46_#_25_#_TRINITY_DN4975_c0_g2_i1	219	1342	Caecomyces churrovis A v1.0	Caecom1_GeneCatalog_proteins_20171213.aa
Piromy_p0_1|307997	17-287:1398.0	1398	0	271	0.8856	263	0.9705	668638 No KEGG functional class	17	287	jgi|Piromy_p0_1|307997|estExt_Genewise1.C_chromosome_1_t50337	17	287	Piromyces sp. UH3-1 v2.0	Piromy_p0_1_GeneCatalog_proteins_20200513.aa
Pirfi3|580071	17-287:1400.0	1400	0	271	0.8686	262	0.9668	668638 No KEGG functional class	17	287	jgi|Pirfi3|580071|fgenesh2_kg.4_#_116_#_Locus2861v1rpkm9.44	17	287	Piromyces finnis v3.0	Pirfi3_GeneCatalog_proteins_20160330.aa
PirE2_1|7450	17-285:1386.0	1386	0	269	0.8734	261	0.9703	668638 No KEGG functional class	17	285	jgi|PirE2_1|7450|gm1.6396_g	17	285	Piromyces sp. E2 v1.0	PirE2_1_GeneCatalog_proteins_20110421.aa
Pecora1|6319	1-287:1386.0	1386	0	287	0.9228	262	0.9129	668638 No KEGG functional class	1	287	jgi|Pecora1|6319|allA06419	1	287	Pecoramyces sp. F1	Pecora1_ExternalModels_proteins_2021-11-19.fasta
Orpsp1_1|1192124	1-287:1386.0	1386	0	287	0.9258	262	0.9129	668638 No KEGG functional class	1	287	jgi|Orpsp1_1|1192124|evm.model.d7180000090764.1	1	287	Orpinomyces sp.	Orpsp1_1_GeneCatalog_proteins_20140826.aa
NeoWI3_1|804601	1-287:1336.0	1336	1.66e-174	287	0.9288	250	0.8711	668638 No KEGG functional class	1	287	jgi|NeoWI3_1|804601|estExt_fgenesh1_pg.C_130235	1	287	Neocallimastix sp. WI3-B v1.0	NeoWI3_1_GeneCatalog_proteins_20201119.aa
NeoWI3_1|803464	1-287:1436.0	1436	0	287	0.9228	273	0.9512	668638 No KEGG functional class	1	287	jgi|NeoWI3_1|803464|estExt_fgenesh1_pg.C_10_t10442	1	287	Neocallimastix sp. WI3-B v1.0	NeoWI3_1_GeneCatalog_proteins_20201119.aa
Neosp1|668638	1-287:1445.0	1445	0	287	0.9228	275	0.9582	668638 No KEGG functional class	1	287	jgi|Neosp1|668638|estExt_fgenesh1_pg.C_610019	1	287	Neocallimastix californiae G1 v1.0	Neosp1_GeneCatalog_proteins_20170918.aa
Neolan1|922763	1-287:1445.0	1445	0	287	0.9228	275	0.9582	668638 No KEGG functional class	1	287	jgi|Neolan1|922763|e_gw1.5.559.1	1	287	Neocallimastix lanati v1.0	Neolan1_GeneCatalog_proteins_20200610.aa
NeoGfMa1|349884	1-287:1436.0	1436	0	287	0.9228	273	0.9512	668638 No KEGG functional class	1	287	jgi|NeoGfMa1|349884|estExt_Genewise1.C_1_t40433	1	287	Neocallimastix sp. Gf-Ma3-1 v1.0	NeoGfMa1_GeneCatalog_proteins_20201119.aa
Pecora1|1797	1088-1360:1121.0 608-784:614.0 786-912:502.0 905-981:260.0 1040-1083:192.0 519-566:167.0 62-162:154.0 201-244:111.0 364-409:110.0 421-456:110.0 487-524:96.0 269-313:95.0 39-65:90.0 465-487:89.0 594-612:80.0 312-343:73.0 243-267:67.0 567-598:64.0 538-576:90.0 406-437:81.0 331-357:71.0 138-168:68.0 868-890:67.0 1271-1322:53.0 67-83:49.0 867-915:81.0 516-560:70.0 935-960:63.0 750-802:52.0 490-507:50…	5135	0	1807	1.0925	918	0.508	668892 No KEGG functional class	39	1360	jgi|Pecora1|1797|allA01777	31	1412	Pecoramyces sp. F1	Pecora1_ExternalModels_proteins_2021-11-19.fasta
Pecora1|1796	608-1361:3147.0 515-567:200.0 566-598:100.0 594-612:79.0 273-336:179.0 366-408:152.0 188-259:151.0 39-85:144.0 81-162:115.0 421-454:111.0 486-524:94.0 338-365:90.0 786-859:88.0 460-485:86.0 868-890:64.0 1271-1326:57.0 406-437:86.0 845-915:85.0 239-272:84.0 138-171:81.0 932-957:61.0 71-106:58.0 174-198:55.0 1122-1178:53.0 1192-1231:47.0 533-581:85.0 770-807:67.0 284-331:61.0 887-912:58.0 490-506:5…	6085	0	2177	1.3472	1143	0.525	668892 No KEGG functional class	39	1361	jgi|Pecora1|1796|allA01776	15	1353	Pecoramyces sp. F1	Pecora1_ExternalModels_proteins_2021-11-19.fasta
Neosp1|705108	557-1019:1747.0 1041-1361:1522.0 486-567:258.0 366-406:159.0 991-1038:146.0 39-109:141.0 180-224:129.0 414-458:107.0 336-364:94.0 245-272:81.0 138-173:76.0 845-899:74.0 786-853:69.0 101-122:56.0 291-308:52.0 1271-1322:52.0 461-480:50.0 406-437:102.0 309-347:88.0 845-912:75.0 769-797:58.0 128-162:50.0 932-957:47.0 1122-1177:46.0 490-559:109.0 827-865:66.0 563-583:55.0 859-884:54.0 704-776:89.0 770…	5766	0	2021	1.1888	1075	0.5319	668892 No KEGG functional class	39	1361	jgi|Neosp1|705108|fgenesh2_kg.160_#_4_#_Locus3846v1rpkm16.93	48	1419	Neocallimastix californiae G1 v1.0	Neosp1_GeneCatalog_proteins_20170918.aa
Neosp1|673388	604-1003:1511.0 1038-1361:1500.0 518-569:192.0 376-407:137.0 74-124:120.0 486-524:109.0 434-453:101.0 45-73:89.0 333-360:87.0 464-487:85.0 191-220:79.0 244-272:76.0 273-299:75.0 128-151:54.0 999-1052:150.0 567-616:134.0 406-443:94.0 135-198:93.0 304-366:72.0 868-912:70.0 827-862:58.0 933-957:58.0 39-64:52.0 524-581:99.0 786-849:72.0 179-199:57.0 865-890:56.0 486-516:54.0 730-757:64.0 825-860:58.0…	5512	0	1808	1.061	1019	0.5636	668892 No KEGG functional class	39	1361	jgi|Neosp1|673388|estExt_fgenesh1_pg.C_1600006	65	1424	Neocallimastix californiae G1 v1.0	Neosp1_GeneCatalog_proteins_20170918.aa
Neosp1|673387	1082-1361:1087.0 785-912:432.0 608-696:272.0 707-784:235.0 905-981:225.0 1013-1081:153.0 519-566:128.0 306-359:124.0 266-304:104.0 434-458:102.0 377-409:96.0 483-515:89.0 460-487:88.0 573-598:77.0 104-151:74.0 252-272:63.0 208-221:55.0 53-85:52.0 536-581:92.0 598-615:84.0 809-849:66.0 866-890:64.0 138-168:58.0 760-804:58.0 402-416:49.0 406-443:86.0 868-912:75.0 788-808:65.0 933-960:63.0 138-154:5…	4313	0	1529	0.9272	771	0.5043	668892 No KEGG functional class	53	1361	jgi|Neosp1|673387|estExt_fgenesh1_pg.C_1600004	55	1369	Neocallimastix californiae G1 v1.0	Neosp1_GeneCatalog_proteins_20170918.aa
Neosp1|668892	39-1361:6979.0 1-20:105.0 845-912:76.0 786-853:76.0 506-581:73.0 224-299:73.0 932-957:60.0 865-890:60.0 254-299:47.0 145-190:47.0 490-505:46.0 203-218:46.0 741-787:45.0 783-815:45.0 299-345:45.0 485-517:45.0	7868	0	1967	1.4453	1519	0.7722	668892 No KEGG functional class	1	1361	jgi|Neosp1|668892|estExt_fgenesh1_pg.C_650001	1	1361	Neocallimastix californiae G1 v1.0	Neosp1_GeneCatalog_proteins_20170918.aa
Caecom1|531898	616-999:1241.0 1126-1361:935.0 1035-1087:184.0 67-162:180.0 520-568:138.0 356-409:128.0 191-240:126.0 414-458:126.0 333-359:83.0 273-306:82.0 458-484:81.0 594-615:69.0 253-274:66.0 169-198:61.0 311-334:58.0 570-583:57.0 1087-1135:150.0 486-529:98.0 930-957:86.0 138-168:73.0 406-437:73.0 868-912:68.0 828-863:65.0 49-82:58.0 533-587:75.0 809-849:69.0 770-807:68.0 868-890:62.0 285-301:47.0 1279-1326…	4903	0	1824	1.0483	896	0.4912	668892 No KEGG functional class	49	1361	jgi|Caecom1|531898|estExt_fgenesh1_pg.C_5650005	50	1455	Caecomyces churrovis A v1.0	Caecom1_GeneCatalog_proteins_20171213.aa
Caecom1|531897	1079-1361:1243.0 597-888:973.0 513-568:173.0 70-122:152.0 369-407:117.0 203-245:114.0 43-72:112.0 994-1048:97.0 311-360:95.0 412-456:92.0 138-172:77.0 240-270:76.0 566-584:66.0 488-516:62.0 463-480:46.0 871-984:421.0 1042-1096:167.0 411-437:88.0 538-565:52.0 770-805:51.0 128-162:49.0 1192-1226:49.0 252-271:48.0 1122-1178:48.0 160-173:46.0 538-565:80.0 865-890:70.0 248-312:61.0 1271-1322:49.0 135-…	5141	0	1922	1.1705	960	0.4995	668892 No KEGG functional class	43	1361	jgi|Caecom1|531897|estExt_fgenesh1_pg.C_5650004	46	1375	Caecomyces churrovis A v1.0	Caecom1_GeneCatalog_proteins_20171213.aa
Caecom1|469389	641-984:1247.0 43-106:177.0 520-568:154.0 104-162:122.0 411-458:115.0 564-613:115.0 177-237:110.0 613-645:101.0 377-409:100.0 333-370:95.0 486-517:94.0 997-1034:93.0 311-334:79.0 463-484:71.0 252-270:63.0 284-307:57.0 805-856:86.0 138-167:74.0 406-437:72.0 232-271:63.0 865-890:62.0 163-240:55.0 788-808:49.0 73-113:45.0 770-836:79.0 859-896:62.0 237-279:61.0 94-118:52.0 280-303:46.0 543-563:46.0 1…	4008	0	1669	1.4265	751	0.45	668892 No KEGG functional class	43	1034	jgi|Caecom1|469389|fgenesh1_kg.1117_#_4_#_TRINITY_DN6149_c0_g1_i1	54	1045	Caecomyces churrovis A v1.0	Caecom1_GeneCatalog_proteins_20171213.aa
Caecom1|453316	1085-1361:1268.0 641-984:1247.0 997-1089:271.0 520-568:154.0 411-458:115.0 564-613:115.0 613-645:101.0 377-409:100.0 333-370:95.0 486-517:94.0 311-334:79.0 463-484:71.0 252-270:63.0 284-307:57.0 43-106:177.0 104-162:122.0 805-856:86.0 406-437:72.0 232-271:63.0 865-890:62.0 163-240:55.0 1271-1322:51.0 788-808:49.0 138-167:74.0 930-966:73.0 868-909:64.0 237-279:61.0 828-863:53.0 280-303:46.0 770-83…	5155	0	1862	1.1444	966	0.5188	668892 No KEGG functional class	43	1361	jgi|Caecom1|453316|fgenesh1_kg.126_#_67_#_TRINITY_DN6149_c0_g1_i1	48	1347	Caecomyces churrovis A v1.0	Caecom1_GeneCatalog_proteins_20171213.aa
Caecom1|624180	32-403:1346.0 401-491:263.0	1609	0	463	0.8973	292	0.6307	669088 No KEGG functional class	32	491	jgi|Caecom1|624180|estExt_Genemark1.C_1850011	30	495	Caecomyces churrovis A v1.0	Caecom1_GeneCatalog_proteins_20171213.aa
Caecom1|556840	32-395:1355.0 399-488:329.0	1684	0	454	0.8748	300	0.6608	669088 No KEGG functional class	32	488	jgi|Caecom1|556840|gm1.14628_g	29	497	Caecomyces churrovis A v1.0	Caecom1_GeneCatalog_proteins_20171213.aa
Caecom1|476562	99-430:1355.0 433-481:232.0	1587	0	381	0.987	281	0.7375	669088 No KEGG functional class	99	481	jgi|Caecom1|476562|fgenesh1_kg.2731_#_11_#_TRINITY_DN7877_c5_g1_i1	1	382	Caecomyces churrovis A v1.0	Caecom1_GeneCatalog_proteins_20171213.aa
Caecom1|476558	99-430:1362.0 433-481:232.0	1594	0	381	0.7728	282	0.7402	669088 No KEGG functional class	99	481	jgi|Caecom1|476558|fgenesh1_kg.2731_#_7_#_TRINITY_DN7877_c5_g1_i1	1	382	Caecomyces churrovis A v1.0	Caecom1_GeneCatalog_proteins_20171213.aa
Caecom1|435797	46-235:663.0 246-398:605.0 409-507:267.0 31-47:53.0	1588	0	459	0.7969	286	0.6231	669088 No KEGG functional class	31	507	jgi|Caecom1|435797|estExt_Genewise1Plus.C_3020009	22	492	Caecomyces churrovis A v1.0	Caecom1_GeneCatalog_proteins_20171213.aa
Caecom1|434246	32-403:1365.0 438-492:218.0 404-433:84.0	1667	0	457	0.8822	304	0.6652	669088 No KEGG functional class	32	492	jgi|Caecom1|434246|estExt_Genewise1Plus.C_1850005	33	495	Caecomyces churrovis A v1.0	Caecom1_GeneCatalog_proteins_20171213.aa
Caecom1|423038	32-403:1359.0 401-493:270.0	1629	0	465	0.8259	293	0.6301	669088 No KEGG functional class	32	493	jgi|Caecom1|423038|estExt_Genewise1.C_4710003	31	498	Caecomyces churrovis A v1.0	Caecom1_GeneCatalog_proteins_20171213.aa
Caecom1|408374	32-395:1355.0 399-488:329.0	1684	0	454	0.8748	300	0.6608	669088 No KEGG functional class	32	488	jgi|Caecom1|408374|e_gw1.820.4.1	29	497	Caecomyces churrovis A v1.0	Caecom1_GeneCatalog_proteins_20171213.aa
Caecom1|246743	31-260:846.0 263-403:516.0 403-491:305.0	1667	0	460	0.9037	296	0.6435	669088 No KEGG functional class	31	491	jgi|Caecom1|246743|CE246742_31723	30	488	Caecomyces churrovis A v1.0	Caecom1_GeneCatalog_proteins_20171213.aa
Caecom1|69273	23-398:1326.0 403-491:280.0	1606	0	465	0.919	289	0.6215	669088 No KEGG functional class	23	491	jgi|Caecom1|69273|CE69272_17341	17	488	Caecomyces churrovis A v1.0	Caecom1_GeneCatalog_proteins_20171213.aa
NeoWI3_1|946460	16-104:436.0	436	5.25e-53	89	0.8476	75	0.8427	669165 No KEGG functional class	16	104	jgi|NeoWI3_1|946460|fgenesh2_kg.87___50___TRINITY_DN12779_c0_g1_i1	16	104	Neocallimastix sp. WI3-B v1.0	NeoWI3_1_GeneCatalog_proteins_20201119.aa
NeoWI3_1|929414	16-100:333.0	333	1.1e-38	85	0.8416	56	0.6588	669165 No KEGG functional class	16	100	jgi|NeoWI3_1|929414|fgenesh2_kg.39___4___TRINITY_DN23207_c0_g1_i1	15	99	Neocallimastix sp. WI3-B v1.0	NeoWI3_1_GeneCatalog_proteins_20201119.aa
NeoWI3_1|810131	16-103:358.0	358	3.69e-42	88	0.8073	63	0.7159	669165 No KEGG functional class	16	103	jgi|NeoWI3_1|810131|estExt_fgenesh1_pg.C_330236	20	107	Neocallimastix sp. WI3-B v1.0	NeoWI3_1_GeneCatalog_proteins_20201119.aa
Neosp1|669165	16-104:499.0	499	6.27e-62	89	0.8558	89	1	669165 No KEGG functional class	16	104	jgi|Neosp1|669165|estExt_fgenesh1_pg.C_700005	16	104	Neocallimastix californiae G1 v1.0	Neosp1_GeneCatalog_proteins_20170918.aa
Neosp1|665640	16-100:334.0	334	5.51e-39	85	0.8416	55	0.6471	669165 No KEGG functional class	16	100	jgi|Neosp1|665640|estExt_fgenesh1_pg.C_230024	15	99	Neocallimastix californiae G1 v1.0	Neosp1_GeneCatalog_proteins_20170918.aa
Neolan1|1736382	16-104:499.0	499	8.36e-62	89	0.8558	89	1	669165 No KEGG functional class	16	104	jgi|Neolan1|1736382|fgenesh2_kg.145___268___TRINITY_DN13344_c0_g1_i1	16	104	Neocallimastix lanati v1.0	Neolan1_GeneCatalog_proteins_20200610.aa
Neolan1|1423028	16-100:334.0	334	7.35e-39	85	0.8416	55	0.6471	669165 No KEGG functional class	16	100	jgi|Neolan1|1423028|estExt_Genemark4.C_300168	15	99	Neocallimastix lanati v1.0	Neolan1_GeneCatalog_proteins_20200610.aa
NeoGfMa1|736170	16-104:441.0	441	1.07e-53	89	0.8476	76	0.8539	669165 No KEGG functional class	16	104	jgi|NeoGfMa1|736170|fgenesh2_kg.96___21___TRINITY_DN10569_c1_g1_i1	16	104	Neocallimastix sp. Gf-Ma3-1 v1.0	NeoGfMa1_GeneCatalog_proteins_20201119.aa
NeoGfMa1|646873	16-103:358.0	358	3.73e-42	88	0.8381	63	0.7159	669165 No KEGG functional class	16	103	jgi|NeoGfMa1|646873|MIX40488_2_65	16	103	Neocallimastix sp. Gf-Ma3-1 v1.0	NeoGfMa1_GeneCatalog_proteins_20201119.aa
NeoGfMa1|415548	16-100:333.0	333	1.12e-38	85	0.8416	56	0.6588	669165 No KEGG functional class	16	100	jgi|NeoGfMa1|415548|estExt_Genewise1Plus.C_550114	15	99	Neocallimastix sp. Gf-Ma3-1 v1.0	NeoGfMa1_GeneCatalog_proteins_20201119.aa
Piromy_p0_1|438823	1-51:118.0 117-129:45.0	163	7.36e-10	64	0.3657	35	0.5469	669258 No KEGG functional class	1	129	jgi|Piromy_p0_1|438823|estExt_fgenesh1_pg.C_chromosome_2_t30440	1	144	Piromyces sp. UH3-1 v2.0	Piromy_p0_1_GeneCatalog_proteins_20200513.aa
Pirfi3|412970	1-52:114.0 89-129:47.0	161	9.02e-10	93	0.5138	38	0.4086	669258 No KEGG functional class	1	129	jgi|Pirfi3|412970|estExt_fgenesh1_pg.C_250076	1	137	Piromyces finnis v3.0	Pirfi3_GeneCatalog_proteins_20160330.aa
NeoWI3_1|769171	1-25:82.0 27-48:58.0	140	1.04e-06	47	0.2994	28	0.5957	669258 No KEGG functional class	1	48	jgi|NeoWI3_1|769171|estExt_Genemark4.C_1130018	1	49	Neocallimastix sp. WI3-B v1.0	NeoWI3_1_GeneCatalog_proteins_20201119.aa
NeoWI3_1|581457	1-50:218.0 99-129:121.0 80-105:106.0 50-58:50.0	495	3.25e-46	116	0.7296	89	0.7672	669258 No KEGG functional class	1	129	jgi|NeoWI3_1|581457|estExt_Genewise1Plus.C_21_t20012	1	136	Neocallimastix sp. WI3-B v1.0	NeoWI3_1_GeneCatalog_proteins_20201119.aa
Neosp1|675409	1-25:82.0 27-48:59.0	141	5.33e-07	47	0.3013	29	0.617	669258 No KEGG functional class	1	48	jgi|Neosp1|675409|estExt_fgenesh1_pg.C_2290042	1	49	Neocallimastix californiae G1 v1.0	Neosp1_GeneCatalog_proteins_20170918.aa
Neosp1|669258	1-58:295.0 80-129:283.0	578	8.97e-66	108	0.8372	108	1	669258 No KEGG functional class	1	129	jgi|Neosp1|669258|estExt_fgenesh1_pg.C_710051	1	129	Neocallimastix californiae G1 v1.0	Neosp1_GeneCatalog_proteins_20170918.aa
Neolan1|1660514	1-58:295.0 80-129:283.0	578	1.17e-65	108	0.8372	108	1	669258 No KEGG functional class	1	129	jgi|Neolan1|1660514|fgenesh2_kg.28___954___TRINITY_DN121_c1_g7_i1	1	129	Neocallimastix lanati v1.0	Neolan1_GeneCatalog_proteins_20200610.aa
Neolan1|1655788	1-25:82.0 27-48:59.0	141	7e-07	47	0.3013	29	0.617	669258 No KEGG functional class	1	48	jgi|Neolan1|1655788|fgenesh2_kg.24___1147___TRINITY_DN476_c1_g1_i1	1	49	Neocallimastix lanati v1.0	Neolan1_GeneCatalog_proteins_20200610.aa
NeoGfMa1|566685	1-50:218.0 99-129:121.0 80-105:106.0 50-58:50.0	495	3.29e-46	116	0.7296	89	0.7672	669258 No KEGG functional class	1	129	jgi|NeoGfMa1|566685|estExt_Genemark4.C_11_t10397	1	136	Neocallimastix sp. Gf-Ma3-1 v1.0	NeoGfMa1_GeneCatalog_proteins_20201119.aa
Anasp1|289810	1-57:105.0 80-129:59.0	164	3.29e-10	107	0.7086	37	0.3458	669258 No KEGG functional class	1	129	jgi|Anasp1|289810|estExt_Genemark1.C_170028	1	129	Anaeromyces robustus v1.0	Anasp1_GeneCatalog_proteins_20160330.aa
Neosp1|675862	111-194:354.0 308-411:346.0 16-109:292.0 251-303:201.0 421-475:199.0 197-250:177.0 578-626:174.0 625-665:150.0 488-523:96.0	1989	0	570	0.9223	336	0.5895	669604 No KEGG functional class	16	665	jgi|Neosp1|675862|estExt_fgenesh1_pg.C_2470005	10	617	Neocallimastix californiae G1 v1.0	Neosp1_GeneCatalog_proteins_20170918.aa
Neosp1|669624	195-302:414.0 111-195:345.0 1-113:343.0 326-413:313.0 420-473:200.0 627-665:159.0 578-626:157.0 493-522:69.0	2000	0	566	0.8927	344	0.6078	669604 No KEGG functional class	1	665	jgi|Neosp1|669624|estExt_fgenesh1_pg.C_770050	1	634	Neocallimastix californiae G1 v1.0	Neosp1_GeneCatalog_proteins_20170918.aa
Neosp1|669604	1-525:2850.0 566-668:615.0	3465	0	628	0.9401	628	1	669604 No KEGG functional class	1	668	jgi|Neosp1|669604|estExt_fgenesh1_pg.C_770002	1	668	Neocallimastix californiae G1 v1.0	Neosp1_GeneCatalog_proteins_20170918.aa
Neosp1|666197	193-301:386.0 315-413:321.0 110-182:311.0 6-111:261.0 625-665:127.0 421-445:86.0 598-621:86.0 502-522:64.0 568-592:63.0 450-460:43.0 624-668:129.0	1877	0	579	0.943	324	0.5596	669604 No KEGG functional class	6	668	jgi|Neosp1|666197|estExt_fgenesh1_pg.C_290006	11	609	Neocallimastix californiae G1 v1.0	Neosp1_GeneCatalog_proteins_20170918.aa
Neosp1|392622	1-182:608.0 193-293:407.0 567-665:333.0 312-390:249.0 421-443:87.0 451-467:75.0 492-522:59.0 397-413:47.0	1865	0	549	0.9	322	0.5865	669604 No KEGG functional class	1	665	jgi|Neosp1|392622|estExt_Genewise1.C_4030005	1	610	Neocallimastix californiae G1 v1.0	Neosp1_GeneCatalog_proteins_20170918.aa
Neosp1|383447	80-207:506.0 212-317:366.0 569-668:362.0 314-413:346.0 419-473:205.0 33-83:144.0 484-523:76.0	2005	0	580	0.8882	344	0.5931	669604 No KEGG functional class	33	668	jgi|Neosp1|383447|estExt_Genewise1.C_910105	1	653	Neocallimastix californiae G1 v1.0	Neosp1_GeneCatalog_proteins_20170918.aa
Caecom1|472013	195-302:428.0 113-195:332.0 316-413:324.0 1-112:314.0 420-471:180.0 580-622:161.0 627-667:134.0 493-521:45.0	1918	0	566	0.8984	334	0.5901	669604 No KEGG functional class	1	667	jgi|Caecom1|472013|fgenesh1_kg.1607_#_4_#_TRINITY_DN4809_c0_g2_i1	1	618	Caecomyces churrovis A v1.0	Caecom1_GeneCatalog_proteins_20171213.aa
Caecom1|273612	33-194:590.0 212-301:347.0 316-413:330.0 580-665:305.0 410-473:207.0 491-522:98.0 193-214:53.0	1930	0	554	0.8921	327	0.5903	669604 No KEGG functional class	33	665	jgi|Caecom1|273612|CE273611_259	1	621	Caecomyces churrovis A v1.0	Caecom1_GeneCatalog_proteins_20171213.aa
Caecom1|273591	1-194:707.0 212-301:345.0 316-413:333.0 578-665:309.0 410-473:207.0 491-522:98.0 193-214:59.0	2058	0	588	0.9005	350	0.5952	669604 No KEGG functional class	1	665	jgi|Caecom1|273591|CE273590_988	1	653	Caecomyces churrovis A v1.0	Caecom1_GeneCatalog_proteins_20171213.aa
Caecom1|22	1-194:696.0 212-301:347.0 316-413:330.0 580-665:305.0 410-473:207.0 491-522:98.0 193-214:53.0	2036	0	586	0.8974	347	0.5922	669604 No KEGG functional class	1	665	jgi|Caecom1|22|CE21_874	1	653	Caecomyces churrovis A v1.0	Caecom1_GeneCatalog_proteins_20171213.aa
Neosp1|675862	14-253:947.0 313-459:589.0 254-298:217.0 592-634:168.0 545-594:166.0 475-503:111.0	2198	0	554	0.8964	376	0.6787	669624 No KEGG functional class	14	634	jgi|Neosp1|675862|estExt_fgenesh1_pg.C_2470005	8	617	Neocallimastix californiae G1 v1.0	Neosp1_GeneCatalog_proteins_20170918.aa
Neosp1|669624	1-506:2737.0 544-634:561.0	3298	0	597	0.9416	597	1	669624 No KEGG functional class	1	634	jgi|Neosp1|669624|estExt_fgenesh1_pg.C_770050	1	634	Neocallimastix californiae G1 v1.0	Neosp1_GeneCatalog_proteins_20170918.aa
Neosp1|669604	198-305:414.0 112-196:345.0 1-113:343.0 313-400:313.0 405-458:200.0 596-634:159.0 545-593:157.0 468-497:69.0	2000	0	566	0.8473	344	0.6078	669624 No KEGG functional class	1	634	jgi|Neosp1|669604|estExt_fgenesh1_pg.C_770002	1	665	Neocallimastix californiae G1 v1.0	Neosp1_GeneCatalog_proteins_20170918.aa
Neosp1|666197	6-184:650.0 313-430:438.0 189-310:427.0 594-634:127.0 567-591:94.0 473-497:76.0 547-558:64.0 435-445:43.0 590-634:114.0 565-589:95.0 545-558:47.0	2175	0	617	1.0049	373	0.6045	669624 No KEGG functional class	6	634	jgi|Neosp1|666197|estExt_fgenesh1_pg.C_290006	11	610	Neocallimastix californiae G1 v1.0	Neosp1_GeneCatalog_proteins_20170918.aa
Neosp1|392622	185-321:498.0 1-110:360.0 115-183:290.0 313-380:268.0 592-634:165.0 547-585:159.0 380-428:153.0 475-505:112.0 436-453:77.0	2082	0	564	0.9246	356	0.6312	669624 No KEGG functional class	1	634	jgi|Neosp1|392622|estExt_Genewise1.C_4030005	1	610	Neocallimastix californiae G1 v1.0	Neosp1_GeneCatalog_proteins_20170918.aa
Neosp1|392363	71-321:857.0 313-378:256.0 1-60:175.0 547-584:160.0 596-634:155.0 380-431:145.0 473-500:89.0 435-452:67.0	1904	0	552	0.9064	320	0.5797	669624 No KEGG functional class	1	634	jgi|Neosp1|392363|estExt_Genewise1.C_3780025	1	608	Neocallimastix californiae G1 v1.0	Neosp1_GeneCatalog_proteins_20170918.aa
Caecom1|472013	1-311:1379.0 313-496:758.0 594-634:156.0 547-589:150.0	2443	0	579	0.919	427	0.7375	669624 No KEGG functional class	1	634	jgi|Caecom1|472013|fgenesh1_kg.1607_#_4_#_TRINITY_DN4809_c0_g2_i1	1	616	Caecomyces churrovis A v1.0	Caecom1_GeneCatalog_proteins_20171213.aa
Caecom1|273612	313-456:579.0 112-217:433.0 215-306:402.0 33-113:304.0 545-592:201.0 593-634:157.0 468-505:122.0	2198	0	551	0.8873	385	0.6987	669624 No KEGG functional class	33	634	jgi|Caecom1|273612|CE273611_259	1	621	Caecomyces churrovis A v1.0	Caecom1_GeneCatalog_proteins_20171213.aa
Caecom1|273591	313-456:574.0 112-217:438.0 1-113:423.0 215-306:401.0 545-593:209.0 593-634:155.0 468-505:122.0 567-588:90.0 545-557:47.0	2459	0	619	0.9479	426	0.6882	669624 No KEGG functional class	1	634	jgi|Caecom1|273591|CE273590_988	1	653	Caecomyces churrovis A v1.0	Caecom1_GeneCatalog_proteins_20171213.aa
Caecom1|22	313-456:579.0 112-217:433.0 1-113:426.0 215-306:402.0 545-592:201.0 593-634:157.0 468-505:122.0	2320	0	583	0.8928	407	0.6981	669624 No KEGG functional class	1	634	jgi|Caecom1|22|CE21_874	1	653	Caecomyces churrovis A v1.0	Caecom1_GeneCatalog_proteins_20171213.aa
Pecora1|9387	182-514:1266.0 17-139:414.0 510-566:171.0 140-181:145.0	1996	0	555	0.9128	361	0.6505	669722 No KEGG functional class	17	566	jgi|Pecora1|9387|allA09564	17	561	Pecoramyces sp. F1	Pecora1_ExternalModels_proteins_2021-11-19.fasta
Pecora1|9386	182-396:786.0 17-139:434.0 433-500:233.0 512-566:184.0 137-171:87.0 402-416:52.0	1776	0	511	0.8502	313	0.6125	669722 No KEGG functional class	17	566	jgi|Pecora1|9386|allA09563	17	554	Pecoramyces sp. F1	Pecora1_ExternalModels_proteins_2021-11-19.fasta
Pecora1|7325	182-514:1312.0 17-139:434.0 510-566:162.0 138-181:135.0	2043	0	557	0.9252	372	0.6679	669722 No KEGG functional class	17	566	jgi|Pecora1|7325|allA07454	17	561	Pecoramyces sp. F1	Pecora1_ExternalModels_proteins_2021-11-19.fasta
Pecora1|3908	297-423:439.0 184-290:412.0 17-139:380.0 433-514:243.0 513-566:135.0 138-182:114.0	1723	0	538	0.8922	312	0.5799	669722 No KEGG functional class	17	566	jgi|Pecora1|3908|allA03981	17	560	Pecoramyces sp. F1	Pecora1_ExternalModels_proteins_2021-11-19.fasta
Neosp1|703728	134-552:1888.0 41-139:416.0	2304	0	518	0.9072	420	0.8108	669722 No KEGG functional class	41	552	jgi|Neosp1|703728|fgenesh2_kg.116_#_32_#_Locus7193v1rpkm5.97	1	511	Neocallimastix californiae G1 v1.0	Neosp1_GeneCatalog_proteins_20170918.aa
Neosp1|669722	1-589:3067.0	3067	0	589	0.9703	577	0.9796	669722 No KEGG functional class	1	589	jgi|Neosp1|669722|estExt_fgenesh1_pg.C_790031	1	589	Neocallimastix californiae G1 v1.0	Neosp1_GeneCatalog_proteins_20170918.aa
Neosp1|664082	296-401:401.0 17-142:396.0 182-290:374.0 433-500:248.0 512-566:184.0 144-171:84.0 399-420:68.0 164-181:49.0	1804	0	532	0.8881	324	0.609	669722 No KEGG functional class	17	566	jgi|Neosp1|664082|estExt_fgenesh1_pg.C_90064	17	553	Neocallimastix californiae G1 v1.0	Neosp1_GeneCatalog_proteins_20170918.aa
Caecom1|626315	292-399:393.0 17-128:349.0 184-259:325.0 432-514:253.0 529-566:120.0 147-179:102.0 260-292:94.0 402-416:52.0	1688	0	498	0.8286	303	0.6084	669722 No KEGG functional class	17	566	jgi|Caecom1|626315|estExt_Genemark1.C_3560003	17	562	Caecomyces churrovis A v1.0	Caecom1_GeneCatalog_proteins_20171213.aa
Caecom1|532880	295-395:408.0 184-292:397.0 17-134:361.0 432-479:180.0 144-179:100.0 529-566:98.0 481-514:90.0	1634	0	484	0.8013	301	0.6219	669722 No KEGG functional class	17	566	jgi|Caecom1|532880|estExt_fgenesh1_pg.C_7660003	17	565	Caecomyces churrovis A v1.0	Caecom1_GeneCatalog_proteins_20171213.aa
Caecom1|529044	143-293:556.0 18-140:399.0 297-396:378.0 433-514:257.0 509-549:111.0 402-417:62.0	1763	0	513	0.8221	324	0.6316	669722 No KEGG functional class	18	549	jgi|Caecom1|529044|estExt_fgenesh1_pg.C_2560014	18	540	Caecomyces churrovis A v1.0	Caecom1_GeneCatalog_proteins_20171213.aa
Piromy_p0_1|530194	21-192:740.0 194-332:569.0 349-431:342.0	1651	0	394	0.8455	288	0.731	670018 No KEGG functional class	21	431	jgi|Piromy_p0_1|530194|fgenesh2_kg.chromosome_4___3688___TRINITY_DN6705_c0_g2_i2	19	427	Piromyces sp. UH3-1 v2.0	Piromy_p0_1_GeneCatalog_proteins_20200513.aa
Pecora1|13335	194-431:1078.0 21-192:841.0	1919	0	410	0.8779	343	0.8366	670018 No KEGG functional class	21	431	jgi|Pecora1|13335|allA15229	21	430	Pecoramyces sp. F1	Pecora1_ExternalModels_proteins_2021-11-19.fasta
NeoWI3_1|801299	20-433:1961.0	1961	0	414	0.8961	353	0.8527	670018 No KEGG functional class	20	433	jgi|NeoWI3_1|801299|estExt_fgenesh1_pg.C_6_t10123	20	433	Neocallimastix sp. WI3-B v1.0	NeoWI3_1_GeneCatalog_proteins_20201119.aa
NeoWI3_1|617495	20-443:2175.0	2175	0	424	0.8964	400	0.9434	670018 No KEGG functional class	20	443	jgi|NeoWI3_1|617495|fgenesh1_pg.25_#_25	20	443	Neocallimastix sp. WI3-B v1.0	NeoWI3_1_GeneCatalog_proteins_20201119.aa
Neosp1|670018	18-445:2242.0	2242	0	428	0.9049	414	0.9673	670018 No KEGG functional class	18	445	jgi|Neosp1|670018|estExt_fgenesh1_pg.C_850034	18	445	Neocallimastix californiae G1 v1.0	Neosp1_GeneCatalog_proteins_20170918.aa
Neosp1|457800	20-435:1951.0	1951	0	416	0.9004	352	0.8462	670018 No KEGG functional class	20	435	jgi|Neosp1|457800|estExt_Genewise1Plus.C_1100087	20	435	Neocallimastix californiae G1 v1.0	Neosp1_GeneCatalog_proteins_20170918.aa
Neolan1|1738840	20-435:1951.0	1951	0	416	0.9004	352	0.8462	670018 No KEGG functional class	20	435	jgi|Neolan1|1738840|fgenesh2_kg.152___442___TRINITY_DN2663_c8_g1_i1	20	435	Neocallimastix lanati v1.0	Neolan1_GeneCatalog_proteins_20200610.aa
Neolan1|1665048	18-445:2242.0	2242	0	428	0.9049	414	0.9673	670018 No KEGG functional class	18	445	jgi|Neolan1|1665048|fgenesh2_kg.32___1231___TRINITY_DN1620_c1_g1_i1	18	445	Neocallimastix lanati v1.0	Neolan1_GeneCatalog_proteins_20200610.aa
NeoGfMa1|369508	20-443:2175.0	2175	0	424	0.8964	400	0.9434	670018 No KEGG functional class	20	443	jgi|NeoGfMa1|369508|estExt_Genewise1.C_27_t10343	20	443	Neocallimastix sp. Gf-Ma3-1 v1.0	NeoGfMa1_GeneCatalog_proteins_20201119.aa
Caecom1|435792	228-435:755.0 21-192:753.0 194-228:126.0	1634	0	415	0.8983	292	0.7036	670018 No KEGG functional class	21	435	jgi|Caecom1|435792|estExt_Genewise1Plus.C_3020003	20	432	Caecomyces churrovis A v1.0	Caecom1_GeneCatalog_proteins_20171213.aa
NeoWI3_1|808606	139-594:2365.0 23-118:544.0	2909	0	552	0.8776	521	0.9438	670098 No KEGG functional class	23	594	jgi|NeoWI3_1|808606|estExt_fgenesh1_pg.C_270026	60	629	Neocallimastix sp. WI3-B v1.0	NeoWI3_1_GeneCatalog_proteins_20201119.aa
NeoWI3_1|540675	139-594:2101.0 1-118:567.0 23-35:72.0 43-72:65.0	2805	0	617	1.0387	491	0.7958	670098 No KEGG functional class	1	594	jgi|NeoWI3_1|540675|estExt_Genewise1.C_27_t10047	1	594	Neocallimastix sp. WI3-B v1.0	NeoWI3_1_GeneCatalog_proteins_20201119.aa
Neosp1|705908	139-594:2015.0 23-116:481.0	2496	0	550	0.9402	436	0.7927	670098 No KEGG functional class	23	594	jgi|Neosp1|705908|fgenesh2_kg.193_#_17_#_Locus1616v1rpkm61.90	23	584	Neocallimastix californiae G1 v1.0	Neosp1_GeneCatalog_proteins_20170918.aa
Neosp1|670098	139-594:2460.0 1-118:613.0	3073	0	574	0.9663	559	0.9739	670098 No KEGG functional class	1	594	jgi|Neosp1|670098|estExt_fgenesh1_pg.C_860047	1	594	Neocallimastix californiae G1 v1.0	Neosp1_GeneCatalog_proteins_20170918.aa
Neosp1|513728	139-594:2026.0 23-114:468.0	2494	0	548	0.9179	431	0.7865	670098 No KEGG functional class	23	594	jgi|Neosp1|513728|fgenesh1_pg.200_#_47	32	597	Neocallimastix californiae G1 v1.0	Neosp1_GeneCatalog_proteins_20170918.aa
Neosp1|382908	139-594:2163.0 1-118:613.0	2776	0	574	0.9663	497	0.8659	670098 No KEGG functional class	1	594	jgi|Neosp1|382908|estExt_Genewise1.C_860118	1	594	Neocallimastix californiae G1 v1.0	Neosp1_GeneCatalog_proteins_20170918.aa
Neolan1|1718597	139-594:2015.0 23-116:481.0	2496	0	550	0.9402	436	0.7927	670098 No KEGG functional class	23	594	jgi|Neolan1|1718597|fgenesh2_kg.105___52___TRINITY_DN2122_c0_g2_i5	23	584	Neocallimastix lanati v1.0	Neolan1_GeneCatalog_proteins_20200610.aa
Neolan1|1428634	139-594:2026.0 23-114:472.0	2498	0	548	0.9179	432	0.7883	670098 No KEGG functional class	23	594	jgi|Neolan1|1428634|estExt_Genemark4.C_690156	32	597	Neocallimastix lanati v1.0	Neolan1_GeneCatalog_proteins_20200610.aa
Neolan1|101020	139-594:2163.0 1-118:613.0	2776	0	574	0.9663	497	0.8659	670098 No KEGG functional class	1	594	jgi|Neolan1|101020|CE101019_3933	1	594	Neocallimastix lanati v1.0	Neolan1_GeneCatalog_proteins_20200610.aa
Neolan1|101009	139-594:2457.0 1-118:613.0	3070	0	574	0.9663	558	0.9721	670098 No KEGG functional class	1	594	jgi|Neolan1|101009|CE101008_2209	1	594	Neocallimastix lanati v1.0	Neolan1_GeneCatalog_proteins_20200610.aa
Neosp1|702846	43-266:1132.0 1-25:104.0	1236	4.73e-157	249	0.9291	236	0.9478	670644 No KEGG functional class	1	266	jgi|Neosp1|702846|fgenesh2_kg.96_#_35_#_Locus11430v1rpkm2.25	1	266	Neocallimastix californiae G1 v1.0	Neosp1_GeneCatalog_proteins_20170918.aa
Neosp1|702844	43-265:1131.0 1-25:102.0	1233	1.23e-156	248	0.9254	235	0.9476	670644 No KEGG functional class	1	265	jgi|Neosp1|702844|fgenesh2_kg.96_#_33_#_Locus11430v1rpkm2.25	1	265	Neocallimastix californiae G1 v1.0	Neosp1_GeneCatalog_proteins_20170918.aa
Neosp1|702843	43-266:1130.0 1-25:112.0	1242	7.05e-158	249	0.9291	237	0.9518	670644 No KEGG functional class	1	266	jgi|Neosp1|702843|fgenesh2_kg.96_#_32_#_Locus11430v1rpkm2.25	1	266	Neocallimastix californiae G1 v1.0	Neosp1_GeneCatalog_proteins_20170918.aa
Neosp1|702839	43-266:1125.0 1-25:112.0	1237	3.45e-157	249	0.9291	237	0.9518	670644 No KEGG functional class	1	266	jgi|Neosp1|702839|fgenesh2_kg.96_#_28_#_Locus10617v1rpkm2.68	1	266	Neocallimastix californiae G1 v1.0	Neosp1_GeneCatalog_proteins_20170918.aa
Neosp1|670644	43-284:1269.0 1-25:118.0	1387	7.26e-178	267	0.9401	267	1	670644 No KEGG functional class	1	284	jgi|Neosp1|670644|estExt_fgenesh1_pg.C_960042	1	284	Neocallimastix californiae G1 v1.0	Neosp1_GeneCatalog_proteins_20170918.aa
Neolan1|1732759	43-266:1136.0 1-25:118.0	1254	2.11e-159	249	0.9291	241	0.9679	670644 No KEGG functional class	1	266	jgi|Neolan1|1732759|fgenesh2_kg.136___88___TRINITY_DN9017_c0_g1_i1	1	266	Neocallimastix lanati v1.0	Neolan1_GeneCatalog_proteins_20200610.aa
Neolan1|1732756	43-265:1131.0 1-25:102.0	1233	1.66e-156	248	0.9254	235	0.9476	670644 No KEGG functional class	1	265	jgi|Neolan1|1732756|fgenesh2_kg.136___85___TRINITY_DN9017_c0_g1_i1	1	265	Neocallimastix lanati v1.0	Neolan1_GeneCatalog_proteins_20200610.aa
Neolan1|1732754	43-266:1132.0 1-25:104.0	1236	6.39e-157	249	0.9291	236	0.9478	670644 No KEGG functional class	1	266	jgi|Neolan1|1732754|fgenesh2_kg.136___83___TRINITY_DN9017_c0_g1_i1	1	266	Neocallimastix lanati v1.0	Neolan1_GeneCatalog_proteins_20200610.aa
Neolan1|1316472	43-266:1130.0 1-25:112.0	1242	9.52e-158	249	0.9291	237	0.9518	670644 No KEGG functional class	1	266	jgi|Neolan1|1316472|estExt_fgenesh1_pg.C_1360021	1	266	Neocallimastix lanati v1.0	Neolan1_GeneCatalog_proteins_20200610.aa
Neolan1|1059433	43-266:1125.0 1-25:112.0	1237	4.65e-157	249	0.9291	237	0.9518	670644 No KEGG functional class	1	266	jgi|Neolan1|1059433|estExt_Genewise1Plus.C_1360048	1	266	Neocallimastix lanati v1.0	Neolan1_GeneCatalog_proteins_20200610.aa
NeoWI3_1|801097	151-346:1001.0 86-157:299.0 25-86:258.0	1558	0	330	0.9677	293	0.8879	670851 No KEGG functional class	25	346	jgi|NeoWI3_1|801097|estExt_fgenesh1_pg.C_5_t20061	18	341	Neocallimastix sp. WI3-B v1.0	NeoWI3_1_GeneCatalog_proteins_20201119.aa
NeoWI3_1|542462	170-346:809.0 86-149:170.0 25-76:157.0 1-26:84.0	1220	1.19e-143	319	0.9667	224	0.7022	670851 No KEGG functional class	1	346	jgi|NeoWI3_1|542462|estExt_Genewise1.C_30_t10181	1	330	Neocallimastix sp. WI3-B v1.0	NeoWI3_1_GeneCatalog_proteins_20201119.aa
Neosp1|675292	170-346:800.0 25-175:475.0	1275	2.72e-161	328	0.9762	235	0.7165	670851 No KEGG functional class	25	346	jgi|Neosp1|675292|estExt_fgenesh1_pg.C_2250017	18	336	Neocallimastix californiae G1 v1.0	Neosp1_GeneCatalog_proteins_20170918.aa
Neosp1|670851	1-346:1810.0	1810	0	346	1	346	1	670851 No KEGG functional class	1	346	jgi|Neosp1|670851|estExt_fgenesh1_pg.C_990046	1	346	Neocallimastix californiae G1 v1.0	Neosp1_GeneCatalog_proteins_20170918.aa
Neolan1|1723199	1-346:1810.0	1810	0	346	1	346	1	670851 No KEGG functional class	1	346	jgi|Neolan1|1723199|fgenesh2_kg.113___349___TRINITY_DN354_c4_g1_i2	1	346	Neocallimastix lanati v1.0	Neolan1_GeneCatalog_proteins_20200610.aa
Neolan1|995608	170-346:800.0 25-175:475.0	1275	3.69e-161	328	0.9762	235	0.7165	670851 No KEGG functional class	25	346	jgi|Neolan1|995608|estExt_Genewise1.C_520182	18	336	Neocallimastix lanati v1.0	Neolan1_GeneCatalog_proteins_20200610.aa
NeoGfMa1|532341	170-346:809.0 86-149:170.0 25-76:157.0 1-26:84.0	1220	1.19e-143	319	0.9667	224	0.7022	670851 No KEGG functional class	1	346	jgi|NeoGfMa1|532341|gm4.31334_g	1	330	Neocallimastix sp. Gf-Ma3-1 v1.0	NeoGfMa1_GeneCatalog_proteins_20201119.aa
NeoGfMa1|366633	151-346:1001.0 86-157:299.0 25-86:258.0	1558	0	330	0.9677	293	0.8879	670851 No KEGG functional class	25	346	jgi|NeoGfMa1|366633|estExt_Genewise1.C_22_t10300	18	341	Neocallimastix sp. Gf-Ma3-1 v1.0	NeoGfMa1_GeneCatalog_proteins_20201119.aa
Caecom1|530356	154-346:702.0 35-147:314.0	1016	6.16e-126	306	0.9134	183	0.598	670851 No KEGG functional class	35	346	jgi|Caecom1|530356|estExt_fgenesh1_pg.C_3670016	32	335	Caecomyces churrovis A v1.0	Caecom1_GeneCatalog_proteins_20171213.aa
Caecom1|528975	161-346:645.0 27-148:293.0	938	2.92e-115	308	0.9139	173	0.5617	670851 No KEGG functional class	27	346	jgi|Caecom1|528975|estExt_fgenesh1_pg.C_2520005	23	337	Caecomyces churrovis A v1.0	Caecom1_GeneCatalog_proteins_20171213.aa
Piromy_p0_1|518677	311-494:492.0 142-246:286.0 517-578:219.0 77-128:139.0 13-73:115.0 597-636:95.0 583-594:63.0 1-21:46.0	1455	5.92e-150	537	0.8075	256	0.4767	671216 No KEGG functional class	1	636	jgi|Piromy_p0_1|518677|fgenesh2_kg.chromosome_1___316___TRINITY_DN5588_c0_g3_i1	1	664	Piromyces sp. UH3-1 v2.0	Piromy_p0_1_GeneCatalog_proteins_20200513.aa
Pecora1|13918	376-495:354.0 147-241:275.0 597-637:187.0 517-560:149.0 562-598:136.0 74-114:109.0 15-74:108.0 325-366:98.0 264-321:61.0	1477	2.44e-154	538	0.8226	263	0.4888	671216 No KEGG functional class	15	637	jgi|Pecora1|13918|allA14399	28	653	Pecoramyces sp. F1	Pecora1_ExternalModels_proteins_2021-11-19.fasta
Pecora1|13917	281-495:631.0 176-242:187.0 597-637:174.0 57-114:168.0 562-595:151.0 519-560:141.0 111-157:128.0 133-178:80.0 619-636:58.0 599-614:55.0	1773	3.8e-177	584	0.9915	304	0.5205	671216 No KEGG functional class	57	637	jgi|Pecora1|13917|allA14398	1	584	Pecoramyces sp. F1	Pecora1_ExternalModels_proteins_2021-11-19.fasta
Orpsp1_1|1180201	281-495:630.0 35-114:235.0 176-242:198.0 597-636:163.0 562-595:151.0 519-560:145.0 111-157:128.0 1-21:66.0 133-178:80.0 619-636:58.0 599-614:55.0	1909	0	626	0.9343	328	0.524	671216 No KEGG functional class	1	636	jgi|Orpsp1_1|1180201|evm.model.c7180000072496.2	1	658	Orpinomyces sp.	Orpsp1_1_GeneCatalog_proteins_20140826.aa
NeoWI3_1|129897	3-247:1149.0 264-497:1109.0 517-637:580.0	2838	0	600	0.9375	512	0.8533	671216 No KEGG functional class	3	637	jgi|NeoWI3_1|129897|CE129896_241	4	640	Neocallimastix sp. WI3-B v1.0	NeoWI3_1_GeneCatalog_proteins_20201119.aa
Neosp1|703292	265-495:519.0 122-241:289.0 596-637:205.0 517-561:156.0 558-595:156.0 77-128:128.0 264-287:54.0 597-610:53.0 619-636:52.0 57-73:44.0	1656	5.38e-152	601	1.0239	285	0.4742	671216 No KEGG functional class	57	637	jgi|Neosp1|703292|fgenesh2_kg.105_#_14_#_Locus9544v1rpkm3.44	1	587	Neocallimastix californiae G1 v1.0	Neosp1_GeneCatalog_proteins_20170918.aa
Neosp1|671216	1-247:1286.0 264-497:1254.0 517-637:696.0	3236	0	602	0.9451	602	1	671216 No KEGG functional class	1	637	jgi|Neosp1|671216|estExt_fgenesh1_pg.C_1050018	1	637	Neocallimastix californiae G1 v1.0	Neosp1_GeneCatalog_proteins_20170918.aa
Neolan1|1649267	1-247:1286.0 264-497:1247.0 517-637:696.0	3229	0	602	0.9451	601	0.9983	671216 No KEGG functional class	1	637	jgi|Neolan1|1649267|fgenesh2_kg.19___850___TRINITY_DN2091_c4_g1_i4	1	637	Neocallimastix lanati v1.0	Neolan1_GeneCatalog_proteins_20200610.aa
Neolan1|1649260	265-495:519.0 122-241:289.0 596-637:205.0 517-561:156.0 558-595:156.0 23-73:129.0 77-128:128.0 264-287:54.0 597-610:53.0 619-636:52.0	1741	1.28e-159	635	0.9784	300	0.4724	671216 No KEGG functional class	23	637	jgi|Neolan1|1649260|fgenesh2_kg.19___843___TRINITY_DN2805_c1_g1_i7	29	649	Neocallimastix lanati v1.0	Neolan1_GeneCatalog_proteins_20200610.aa
NeoGfMa1|412156	3-247:1147.0 264-497:1109.0 517-637:586.0	2842	0	600	0.9375	513	0.855	671216 No KEGG functional class	3	637	jgi|NeoGfMa1|412156|estExt_Genewise1Plus.C_420387	4	640	Neocallimastix sp. Gf-Ma3-1 v1.0	NeoGfMa1_GeneCatalog_proteins_20201119.aa
Piromy_p0_1|311826	83-540:2046.0 21-57:157.0	2203	0	495	0.8839	383	0.7737	671856 No KEGG functional class	21	540	jgi|Piromy_p0_1|311826|estExt_Genewise1.C_chromosome_3_t20155	25	559	Piromyces sp. UH3-1 v2.0	Piromy_p0_1_GeneCatalog_proteins_20200513.aa
PirE2_1|62393	84-539:2044.0	2044	0	456	0.9661	358	0.7851	671856 No KEGG functional class	84	539	jgi|PirE2_1|62393|fgenesh1_pg.225_#_2	13	468	Piromyces sp. E2 v1.0	PirE2_1_GeneCatalog_proteins_20110421.aa
Pecora1|8172	88-541:2209.0	2209	0	454	0.9978	389	0.8568	671856 No KEGG functional class	88	541	jgi|Pecora1|8172|allA08356	1	454	Pecoramyces sp. F1	Pecora1_ExternalModels_proteins_2021-11-19.fasta
NeoWI3_1|786771	83-541:2453.0 1-58:232.0	2685	0	517	0.9383	484	0.9362	671856 No KEGG functional class	1	541	jgi|NeoWI3_1|786771|estExt_fgenesh1_pm.C_40007	3	551	Neocallimastix sp. WI3-B v1.0	NeoWI3_1_GeneCatalog_proteins_20201119.aa
Neosp1|678759	84-541:2197.0 20-58:188.0	2385	0	497	0.929	419	0.8431	671856 No KEGG functional class	20	541	jgi|Neosp1|678759|estExt_fgenesh1_pg.C_5420005	22	535	Neocallimastix californiae G1 v1.0	Neosp1_GeneCatalog_proteins_20170918.aa
Neosp1|673892	242-541:1482.0 96-221:467.0 84-96:70.0	2019	0	439	0.9301	358	0.8155	671856 No KEGG functional class	84	541	jgi|Neosp1|673892|estExt_fgenesh1_pg.C_1760046	28	472	Neocallimastix californiae G1 v1.0	Neosp1_GeneCatalog_proteins_20170918.aa
Neosp1|671856	83-541:2527.0 1-58:246.0	2773	0	517	0.9556	504	0.9749	671856 No KEGG functional class	1	541	jgi|Neosp1|671856|estExt_fgenesh1_pg.C_1190016	1	541	Neocallimastix californiae G1 v1.0	Neosp1_GeneCatalog_proteins_20170918.aa
Neolan1|1436424	83-541:2527.0 1-58:246.0	2773	0	517	0.9556	504	0.9749	671856 No KEGG functional class	1	541	jgi|Neolan1|1436424|estExt_Genemark4.C_1870016	1	541	Neocallimastix lanati v1.0	Neolan1_GeneCatalog_proteins_20200610.aa
Neolan1|1022653	84-541:2197.0 20-58:188.0	2385	0	497	0.929	419	0.8431	671856 No KEGG functional class	20	541	jgi|Neolan1|1022653|estExt_Genewise1Plus.C_2_t20165	22	535	Neocallimastix lanati v1.0	Neolan1_GeneCatalog_proteins_20200610.aa
Caecom1|457683	84-539:2041.0	2041	0	456	0.7391	361	0.7917	671856 No KEGG functional class	84	539	jgi|Caecom1|457683|fgenesh1_kg.221_#_58_#_TRINITY_DN4360_c0_g1_i1	158	613	Caecomyces churrovis A v1.0	Caecom1_GeneCatalog_proteins_20171213.aa
Pecora1|14913	1-79:266.0 115-124:41.0	307	7.23e-30	89	0.6054	54	0.6067	671879 No KEGG functional class	1	124	jgi|Pecora1|14913|allA15631	1	127	Pecoramyces sp. F1	Pecora1_ExternalModels_proteins_2021-11-19.fasta
Orpsp1_1|1189435	1-79:266.0 115-124:41.0	307	6.03e-30	89	0.6096	54	0.6067	671879 No KEGG functional class	1	124	jgi|Orpsp1_1|1189435|evm.model.d7180000072023.1	1	127	Orpinomyces sp.	Orpsp1_1_GeneCatalog_proteins_20140826.aa
Orpsp1_1|1188588	1-79:266.0 115-124:41.0	307	6.03e-30	89	0.6096	54	0.6067	671879 No KEGG functional class	1	124	jgi|Orpsp1_1|1188588|evm.model.d7180000065905.1	1	127	Orpinomyces sp.	Orpsp1_1_GeneCatalog_proteins_20140826.aa
Orpsp1_1|1186789	1-79:266.0 115-124:41.0	307	6.03e-30	89	0.6096	54	0.6067	671879 No KEGG functional class	1	124	jgi|Orpsp1_1|1186789|evm.model.d7180000053324.1	1	127	Orpinomyces sp.	Orpsp1_1_GeneCatalog_proteins_20140826.aa
NeoWI3_1|768486	1-81:323.0 102-124:43.0	366	9.62e-38	104	0.7172	71	0.6827	671879 No KEGG functional class	1	124	jgi|NeoWI3_1|768486|estExt_Genemark4.C_880020	1	127	Neocallimastix sp. WI3-B v1.0	NeoWI3_1_GeneCatalog_proteins_20201119.aa
Neosp1|703846	1-88:451.0 102-125:131.0	582	1.22e-67	112	0.8296	110	0.9821	671879 No KEGG functional class	1	125	jgi|Neosp1|703846|fgenesh2_kg.120_#_3_#_Locus1130v1rpkm104.58	1	124	Neocallimastix californiae G1 v1.0	Neosp1_GeneCatalog_proteins_20170918.aa
Neosp1|671879	1-125:574.0	574	7.25e-72	125	0.8803	112	0.896	671879 No KEGG functional class	1	125	jgi|Neosp1|671879|estExt_fgenesh1_pg.C_1200005	1	125	Neocallimastix californiae G1 v1.0	Neosp1_GeneCatalog_proteins_20170918.aa
Neolan1|1680650	1-88:454.0 102-125:131.0	585	6.58e-68	112	0.7943	111	0.9911	671879 No KEGG functional class	1	125	jgi|Neolan1|1680650|fgenesh2_kg.48___963___TRINITY_DN10743_c1_g1_i1	1	124	Neocallimastix lanati v1.0	Neolan1_GeneCatalog_proteins_20200610.aa
Neolan1|1309446	1-125:574.0	574	9.73e-72	125	0.8803	112	0.896	671879 No KEGG functional class	1	125	jgi|Neolan1|1309446|estExt_fgenesh1_pg.C_480111	1	125	Neocallimastix lanati v1.0	Neolan1_GeneCatalog_proteins_20200610.aa
NeoGfMa1|442654	1-81:323.0 102-124:43.0	366	9.73e-38	104	0.7172	71	0.6827	671879 No KEGG functional class	1	124	jgi|NeoGfMa1|442654|fgenesh1_pg.50_#_78	1	127	Neocallimastix sp. Gf-Ma3-1 v1.0	NeoGfMa1_GeneCatalog_proteins_20201119.aa
PirE2_1|20846	915-1070:553.0 1155-1321:471.0 792-918:338.0 644-730:159.0 1318-1368:147.0 486-524:77.0 318-344:68.0 431-468:67.0 119-139:57.0 569-597:51.0 599-614:46.0 628-643:46.0 172-194:45.0 1109-1189:194.0 1058-1108:101.0 546-615:87.0 1025-1060:67.0 326-344:64.0 648-669:52.0 155-185:51.0 302-314:48.0 340-353:45.0 575-590:63.0 709-746:60.0 1073-1113:58.0 628-643:52.0 666-685:52.0 297-314:50.0 1153-1165:50.0 …	3534	0	1505	1.1165	642	0.4266	672438 No KEGG functional class	119	1368	jgi|PirE2_1|20846|estExt_Genemark1.C_1970020	145	1339	Piromyces sp. E2 v1.0	PirE2_1_GeneCatalog_proteins_20110421.aa
PirE2_1|19070	752-1073:1022.0 648-751:213.0 482-553:209.0 566-649:159.0 324-344:85.0 436-468:66.0 344-361:51.0 1180-1196:51.0 1060-1170:277.0 628-676:111.0 709-749:65.0 561-599:51.0 326-358:85.0 1073-1113:69.0 612-643:66.0 724-746:61.0 1175-1221:48.0	2689	0	1087	1.2409	492	0.4526	672438 No KEGG functional class	324	1221	jgi|PirE2_1|19070|gm1.18016_g	8	874	Piromyces sp. E2 v1.0	PirE2_1_GeneCatalog_proteins_20110421.aa
PirE2_1|18575	818-1073:924.0 1167-1346:659.0 1058-1182:266.0	1849	0	561	1.0625	328	0.5847	672438 No KEGG functional class	818	1346	jgi|PirE2_1|18575|gm1.17521_g	1	527	Piromyces sp. E2 v1.0	PirE2_1_GeneCatalog_proteins_20110421.aa
PirE2_1|18244	759-1073:993.0 1167-1352:662.0 482-569:252.0 648-766:225.0 566-627:159.0 318-344:90.0 436-463:57.0 169-190:55.0 347-365:54.0 1060-1171:276.0 625-675:112.0 709-749:74.0 326-350:56.0 561-599:56.0 187-213:53.0 324-382:88.0 1073-1112:68.0 587-614:59.0 632-678:59.0 1180-1197:57.0 175-200:52.0 217-293:70.0 587-614:68.0 882-928:63.0 988-1045:53.0 621-644:66.0 597-628:61.0 1148-1185:53.0 566-587:52.0 233…	4091	0	1729	1.0052	757	0.4378	672438 No KEGG functional class	169	1352	jgi|PirE2_1|18244|gm1.17190_g	61	1698	Piromyces sp. E2 v1.0	PirE2_1_GeneCatalog_proteins_20110421.aa
PirE2_1|17801	790-1064:890.0 1167-1354:637.0 646-756:185.0 470-523:133.0 566-616:124.0 318-344:87.0 531-553:65.0 347-365:60.0 434-463:60.0 175-195:51.0 628-646:49.0 1052-1156:193.0 628-680:93.0 709-749:72.0 281-339:66.0 561-599:62.0 552-614:82.0 1140-1182:80.0 326-358:72.0 1073-1112:50.0	3111	0	1294	0.2699	554	0.4281	672438 No KEGG functional class	175	1354	jgi|PirE2_1|17801|gm1.16747_g	331	4768	Piromyces sp. E2 v1.0	PirE2_1_GeneCatalog_proteins_20110421.aa
PirE2_1|12265	792-1070:796.0 1128-1363:730.0 478-521:131.0 628-688:113.0 565-601:90.0 702-735:79.0 263-318:70.0 436-471:67.0 326-357:53.0 598-615:53.0 1058-1141:200.0 628-663:89.0 717-758:71.0 568-603:60.0 284-325:59.0 166-201:55.0 1180-1202:46.0 310-359:92.0 565-628:81.0 229-253:53.0 648-674:52.0 118-129:50.0 922-968:47.0 281-375:97.0 587-612:66.0	3300	0	1478	1.046	607	0.4107	672438 No KEGG functional class	118	1363	jgi|PirE2_1|12265|gm1.11211_g	165	1402	Piromyces sp. E2 v1.0	PirE2_1_GeneCatalog_proteins_20110421.aa
PirE2_1|10348	792-1070:719.0 1168-1276:314.0 480-551:155.0 1270-1317:155.0 566-616:130.0 628-685:120.0 1324-1373:114.0 321-374:112.0 694-733:73.0 436-472:65.0 1058-1169:284.0 625-685:98.0 547-598:90.0 709-751:90.0 597-615:56.0 976-998:51.0 319-344:49.0 575-615:96.0 324-359:81.0 1142-1170:59.0 880-906:53.0 628-670:49.0 591-627:78.0 628-658:65.0 658-694:55.0 656-685:56.0 617-647:55.0 715-749:55.0 544-582:43.0 32…	3621	0	1642	0.9988	661	0.4026	672438 No KEGG functional class	319	1373	jgi|PirE2_1|10348|gm1.9294_g	393	1642	Piromyces sp. E2 v1.0	PirE2_1_GeneCatalog_proteins_20110421.aa
PirE2_1|10347	792-1070:715.0 1172-1274:311.0 480-597:185.0 1270-1321:156.0 1320-1371:128.0 628-686:126.0 696-733:87.0 436-474:76.0 329-366:74.0 369-409:62.0 311-336:53.0 120-147:48.0 240-252:46.0 1058-1166:269.0 561-627:159.0 709-757:98.0 311-349:81.0 528-569:56.0 878-912:55.0 310-357:114.0 575-645:85.0 871-909:53.0 170-208:50.0 1142-1165:50.0 615-675:104.0 321-346:55.0 547-575:55.0 572-596:54.0 1052-1088:49.0…	3974	0	1921	1.2338	724	0.3769	672438 No KEGG functional class	120	1371	jgi|PirE2_1|10347|gm1.9293_g	137	1553	Piromyces sp. E2 v1.0	PirE2_1_GeneCatalog_proteins_20110421.aa
PirE2_1|6599	759-1073:999.0 1167-1356:660.0 566-627:148.0 717-749:67.0 624-773:302.0 1060-1170:278.0 534-585:94.0 576-614:82.0 326-382:70.0 1073-1112:65.0 632-678:59.0 1175-1222:52.0 628-675:97.0 882-928:63.0 988-1045:53.0	3089	0	1297	1.5477	577	0.4449	672438 No KEGG functional class	326	1356	jgi|PirE2_1|6599|gm1.5545_g	16	838	Piromyces sp. E2 v1.0	PirE2_1_GeneCatalog_proteins_20110421.aa
PirE2_1|3223	1074-1321:699.0 869-969:269.0 969-1074:249.0 469-551:148.0 658-756:113.0 1318-1375:105.0 575-638:91.0 823-849:87.0 792-821:83.0 627-673:95.0 878-960:92.0 324-357:83.0 684-730:72.0 436-476:66.0 1152-1165:53.0 166-193:52.0 547-605:52.0 230-252:48.0 301-344:83.0 542-589:77.0 640-679:70.0 1073-1113:57.0 624-648:53.0 1168-1185:47.0 719-746:46.0 573-612:85.0 311-384:80.0 187-276:55.0 666-695:64.0 628-6…	3801	0	2068	1.3047	724	0.3501	672438 No KEGG functional class	166	1375	jgi|PirE2_1|3223|gm1.2169_g	185	1585	Piromyces sp. E2 v1.0	PirE2_1_GeneCatalog_proteins_20110421.aa
Piromy_p0_1|348875	252-633:1302.0 133-245:341.0 31-75:127.0 76-144:177.0 317-362:116.0 255-312:101.0 609-678:98.0 141-165:47.0 545-580:105.0 471-540:75.0 591-621:48.0 34-86:93.0 131-165:61.0 96-116:42.0	2733	0	1054	1.4866	474	0.4497	672821 No KEGG functional class	31	678	jgi|Piromy_p0_1|348875|estExt_Genewise1Plus.C_chromosome_4_t50303	40	681	Piromyces sp. UH3-1 v2.0	Piromy_p0_1_GeneCatalog_proteins_20200513.aa
Pirfi3|320824	253-626:1215.0 133-252:330.0 75-128:163.0 26-75:129.0 648-674:68.0 317-361:129.0 255-312:98.0 37-87:65.0 364-402:49.0 141-162:46.0 539-580:97.0 512-543:60.0 591-621:49.0 479-497:42.0 34-86:92.0 141-162:60.0 96-116:43.0	2735	0	1060	1.5014	466	0.4396	672821 No KEGG functional class	26	674	jgi|Pirfi3|320824|estExt_Genewise1.C_8_t20124	35	676	Piromyces finnis v3.0	Pirfi3_GeneCatalog_proteins_20160330.aa
PirE2_1|58343	250-626:1265.0 76-242:502.0 31-75:104.0 626-674:90.0 318-361:121.0 255-309:95.0 37-87:61.0 141-165:51.0 547-588:98.0 479-543:76.0 591-621:46.0 34-86:91.0 141-173:65.0	2665	0	1037	0.8542	463	0.4465	672821 No KEGG functional class	31	674	jgi|PirE2_1|58343|fgenesh1_pg.31_#_21	547	1182	Piromyces sp. E2 v1.0	PirE2_1_GeneCatalog_proteins_20110421.aa
Pecora1|15570	21-637:2462.0 634-653:44.0 620-677:147.0 255-312:95.0 319-361:95.0 31-87:71.0 3-33:62.0 140-165:48.0 207-243:46.0 531-588:105.0 483-530:83.0 591-617:53.0 34-83:95.0 136-162:58.0 78-117:42.0 480-540:89.0 249-305:53.0 330-372:46.0 562-588:43.0	3737	0	1385	1.9645	683	0.4931	672821 No KEGG functional class	3	677	jgi|Pecora1|15570|allA16239	1	679	Pecoramyces sp. F1	Pecora1_ExternalModels_proteins_2021-11-19.fasta
Orpsp1_1|1175387	21-637:2462.0 634-653:44.0 620-677:147.0 255-312:95.0 319-361:95.0 31-87:71.0 3-33:62.0 140-165:48.0 207-243:46.0 531-588:105.0 483-530:83.0 591-617:53.0 34-83:95.0 136-162:58.0 78-117:42.0 480-540:89.0 249-305:53.0 330-372:46.0 562-588:43.0	3737	0	1385	1.9673	683	0.4931	672821 No KEGG functional class	3	677	jgi|Orpsp1_1|1175387|evm.model.c7180000053655.2	1	679	Orpinomyces sp.	Orpsp1_1_GeneCatalog_proteins_20140826.aa
NeoWI3_1|575527	3-587:2849.0 583-703:427.0 531-588:104.0 480-537:101.0 258-308:85.0 321-344:43.0 305-361:107.0 255-312:93.0 37-87:77.0 480-529:93.0 585-617:68.0 528-566:48.0 34-83:95.0 135-162:69.0	4259	0	1263	1.8069	797	0.631	672821 No KEGG functional class	3	703	jgi|NeoWI3_1|575527|estExt_Genewise1Plus.C_14_t10139	1	699	Neocallimastix sp. WI3-B v1.0	NeoWI3_1_GeneCatalog_proteins_20201119.aa
Neosp1|672821	1-703:3585.0 531-588:105.0 305-362:105.0 480-537:98.0 255-312:98.0 258-308:75.0 37-87:75.0 480-529:98.0 34-83:98.0 585-617:74.0 130-162:74.0	4485	0	1203	1.7112	852	0.7082	672821 No KEGG functional class	1	703	jgi|Neosp1|672821|estExt_fgenesh1_pg.C_1420059	1	703	Neocallimastix californiae G1 v1.0	Neosp1_GeneCatalog_proteins_20170918.aa
Neolan1|1062984	1-703:3585.0 531-588:105.0 305-362:105.0 480-537:98.0 255-312:98.0 258-308:75.0 37-87:75.0 480-529:98.0 34-83:98.0 585-617:74.0 130-162:74.0	4485	0	1203	1.7112	852	0.7082	672821 No KEGG functional class	1	703	jgi|Neolan1|1062984|estExt_Genewise1Plus.C_1720004	1	703	Neocallimastix lanati v1.0	Neolan1_GeneCatalog_proteins_20200610.aa
NeoGfMa1|596523	3-587:2849.0 583-703:427.0 531-588:104.0 480-537:101.0 258-308:85.0 321-344:43.0 305-361:107.0 255-312:93.0 37-87:77.0 480-529:93.0 585-617:68.0 528-566:48.0 34-83:95.0 135-162:69.0	4259	0	1263	1.8069	797	0.631	672821 No KEGG functional class	3	703	jgi|NeoGfMa1|596523|estExt_fgenesh1_pm.C_50230	1	699	Neocallimastix sp. Gf-Ma3-1 v1.0	NeoGfMa1_GeneCatalog_proteins_20201119.aa
Anasp1|294257	253-570:1206.0 21-255:733.0 568-632:197.0 3-27:59.0 544-579:97.0 611-678:96.0 479-543:94.0 265-307:51.0 367-393:50.0 255-312:97.0 317-344:69.0 37-87:62.0 342-365:60.0 34-87:87.0 131-165:72.0 480-533:97.0 592-617:53.0	3180	0	1212	1.7414	567	0.4678	672821 No KEGG functional class	3	678	jgi|Anasp1|294257|estExt_Genemark1.C_1650017	1	669	Anaeromyces robustus v1.0	Anasp1_GeneCatalog_proteins_20160330.aa
Orpsp1_1|1190813	84-348:625.0 682-860:531.0 356-446:236.0 509-542:140.0 469-506:79.0 543-695:516.0 844-991:430.0	2557	0	908	1.2337	475	0.5231	673242 No KEGG functional class	84	991	jgi|Orpsp1_1|1190813|evm.model.d7180000081358.1	56	734	Orpinomyces sp.	Orpsp1_1_GeneCatalog_proteins_20140826.aa
Orpsp1_1|1183929	692-994:878.0 84-348:615.0 543-695:512.0 356-446:236.0 509-542:140.0 469-506:79.0 682-860:533.0 858-985:389.0 543-824:848.0 844-991:432.0 544-668:378.0	5040	0	1746	1.6902	925	0.5298	673242 No KEGG functional class	84	994	jgi|Orpsp1_1|1183929|evm.model.c7180000087265.1	56	1029	Orpinomyces sp.	Orpsp1_1_GeneCatalog_proteins_20140826.aa
Orpsp1_1|1183475	187-445:675.0 684-840:501.0 83-189:269.0 503-542:151.0 469-505:93.0 543-680:442.0 844-984:438.0	2569	0	879	1.2739	472	0.537	673242 No KEGG functional class	83	984	jgi|Orpsp1_1|1183475|evm.model.c7180000085370.1	18	690	Orpinomyces sp.	Orpsp1_1_GeneCatalog_proteins_20140826.aa
Orpsp1_1|1181901	692-994:901.0 543-695:495.0 246-346:301.0 351-446:247.0 84-181:227.0 509-539:133.0 190-236:130.0 469-504:92.0 682-860:544.0 858-985:399.0 543-825:847.0 844-984:434.0 544-665:387.0	5137	0	1718	1.686	937	0.5454	673242 No KEGG functional class	84	994	jgi|Orpsp1_1|1181901|evm.model.c7180000079072.1	38	1015	Orpinomyces sp.	Orpsp1_1_GeneCatalog_proteins_20140826.aa
Orpsp1_1|1180663	698-994:884.0 543-700:491.0 246-346:301.0 351-446:247.0 84-181:227.0 509-539:133.0 190-236:130.0 469-504:92.0 682-856:536.0 858-985:394.0 543-824:840.0 844-984:425.0 544-668:382.0	5082	0	1715	1.683	925	0.5394	673242 No KEGG functional class	84	994	jgi|Orpsp1_1|1180663|evm.model.c7180000074246.1	38	1015	Orpinomyces sp.	Orpsp1_1_GeneCatalog_proteins_20140826.aa
Neosp1|696771	543-996:1519.0 272-447:577.0 84-275:551.0 467-541:288.0 24-42:57.0 672-996:1103.0 543-669:431.0 543-851:1093.0 858-991:424.0 543-825:930.0 830-996:604.0 672-985:1039.0 543-667:437.0 543-895:1137.0 890-985:328.0 543-985:1412.0 730-984:857.0 543-733:578.0 576-829:824.0 825-984:479.0 543-575:132.0 830-985:527.0 543-726:507.0 732-800:56.0 698-984:955.0 684-985:913.0 543-825:911.0 672-825:511.0 543-66…	20485	0	6314	2.4008	3677	0.5824	673242 No KEGG functional class	24	996	jgi|Neosp1|696771|fgenesh2_kg.2_#_25_#_Locus13091v1rpkm1.61	25	2630	Neocallimastix californiae G1 v1.0	Neosp1_GeneCatalog_proteins_20170918.aa
Neosp1|673242	465-996:2932.0 24-448:2120.0 703-985:883.0 543-825:883.0 686-709:47.0 514-537:47.0 987-996:44.0 829-838:44.0 863-987:384.0 543-667:384.0	7768	0	1841	1.8484	1438	0.7811	673242 No KEGG functional class	24	996	jgi|Neosp1|673242|estExt_fgenesh1_pg.C_1560003	24	996	Neocallimastix californiae G1 v1.0	Neosp1_GeneCatalog_proteins_20170918.aa
Neosp1|673241	193-445:689.0 684-801:344.0 509-542:161.0 127-181:144.0 802-840:135.0 92-123:104.0 467-504:99.0 842-975:350.0 543-655:290.0 642-675:120.0	2436	0	850	1.1456	455	0.5353	673242 No KEGG functional class	92	975	jgi|Neosp1|673241|estExt_fgenesh1_pg.C_1560002	50	742	Neocallimastix californiae G1 v1.0	Neosp1_GeneCatalog_proteins_20170918.aa
Neosp1|621216	543-695:599.0 84-275:573.0 698-831:516.0 351-447:313.0 469-542:311.0 281-338:225.0 684-853:548.0 855-984:427.0 844-987:463.0 543-664:440.0	4415	0	1274	1.4444	795	0.624	673242 No KEGG functional class	84	987	jgi|Neosp1|621216|MIX2357_10_46	77	872	Neocallimastix californiae G1 v1.0	Neosp1_GeneCatalog_proteins_20170918.aa
Neosp1|498680	543-996:1677.0 84-275:574.0 270-447:541.0 467-540:307.0 24-42:57.0 543-825:926.0 829-995:617.0 829-996:586.0 671-825:508.0 543-667:419.0 671-825:504.0 543-667:433.0 684-985:869.0 543-667:434.0 844-987:420.0	8872	0	2666	1.9748	1572	0.5896	673242 No KEGG functional class	24	996	jgi|Neosp1|498680|fgenesh1_pg.2_#_25	24	1350	Neocallimastix californiae G1 v1.0	Neosp1_GeneCatalog_proteins_20170918.aa
NeoWI3_1|948154	258-386:546.0 132-238:293.0	839	5.32e-102	236	0.6448	158	0.6695	673326 No KEGG functional class	132	386	jgi|NeoWI3_1|948154|fgenesh2_kg.101___70___TRINITY_DN8463_c0_g1_i1	112	366	Neocallimastix sp. WI3-B v1.0	NeoWI3_1_GeneCatalog_proteins_20201119.aa
NeoWI3_1|730568	143-233:339.0 258-304:211.0 318-356:188.0 26-79:176.0 358-377:55.0	969	8.07e-103	251	0.5744	184	0.7331	673326 No KEGG functional class	26	377	jgi|NeoWI3_1|730568|gm4.24245_g	116	373	Neocallimastix sp. WI3-B v1.0	NeoWI3_1_GeneCatalog_proteins_20201119.aa
Neosp1|673326	258-386:671.0 132-238:570.0 1-115:440.0	1681	0	351	0.9093	322	0.9174	673326 No KEGG functional class	1	386	jgi|Neosp1|673326|estExt_fgenesh1_pg.C_1580010	1	386	Neocallimastix californiae G1 v1.0	Neosp1_GeneCatalog_proteins_20170918.aa
Neolan1|1427111	258-386:671.0 132-238:570.0 1-115:433.0	1674	0	351	0.9093	321	0.9145	673326 No KEGG functional class	1	386	jgi|Neolan1|1427111|estExt_Genemark4.C_560206	1	386	Neocallimastix lanati v1.0	Neolan1_GeneCatalog_proteins_20200610.aa
Neolan1|1294326	258-386:605.0 132-234:421.0 1-90:227.0	1253	3.6e-152	322	0.832	245	0.7609	673326 No KEGG functional class	1	386	jgi|Neolan1|1294326|estExt_fgenesh1_pm.C_740001	2	387	Neocallimastix lanati v1.0	Neolan1_GeneCatalog_proteins_20200610.aa
Neolan1|1291947	258-386:606.0 132-234:414.0 1-88:221.0	1241	1.45e-150	320	0.8649	242	0.7563	673326 No KEGG functional class	1	386	jgi|Neolan1|1291947|estExt_fgenesh1_pm.C_450051	2	370	Neocallimastix lanati v1.0	Neolan1_GeneCatalog_proteins_20200610.aa
Neolan1|1031677	258-383:483.0 132-190:220.0 197-229:102.0	805	1.8e-92	218	0.7219	148	0.6789	673326 No KEGG functional class	132	383	jgi|Neolan1|1031677|estExt_Genewise1Plus.C_180163	41	299	Neocallimastix lanati v1.0	Neolan1_GeneCatalog_proteins_20200610.aa
NeoGfMa1|517922	143-233:339.0 258-304:211.0 318-356:188.0 26-79:176.0 358-377:55.0	969	9.11e-103	251	0.5603	184	0.7331	673326 No KEGG functional class	26	377	jgi|NeoGfMa1|517922|gm4.16915_g	127	384	Neocallimastix sp. Gf-Ma3-1 v1.0	NeoGfMa1_GeneCatalog_proteins_20201119.aa
NeoGfMa1|422920	258-386:546.0 132-238:293.0	839	5.38e-102	236	0.6448	158	0.6695	673326 No KEGG functional class	132	386	jgi|NeoGfMa1|422920|estExt_Genewise1Plus.C_1320030	112	366	Neocallimastix sp. Gf-Ma3-1 v1.0	NeoGfMa1_GeneCatalog_proteins_20201119.aa
Caecom1|589658	258-383:516.0 134-190:175.0 194-229:111.0	802	2.62e-92	219	0.6169	147	0.6712	673326 No KEGG functional class	134	383	jgi|Caecom1|589658|MIX17054_2_28	103	355	Caecomyces churrovis A v1.0	Caecom1_GeneCatalog_proteins_20171213.aa
Orpsp1_1|1189170	66-248:704.0 661-776:334.0 252-330:200.0 466-530:194.0 351-438:174.0 594-646:167.0 537-576:143.0 152-227:195.0 63-101:101.0 112-154:99.0 687-776:123.0 528-564:113.0 487-523:103.0 593-654:79.0	2729	0	1008	0.9786	496	0.4921	673328 No KEGG functional class	63	776	jgi|Orpsp1_1|1189170|evm.model.d7180000069965.2	48	784	Orpinomyces sp.	Orpsp1_1_GeneCatalog_proteins_20140826.aa
Orpsp1_1|1188997	66-225:647.0 594-714:307.0 248-330:222.0 351-432:211.0 716-784:198.0 471-527:168.0 536-566:91.0 831-849:60.0 681-777:161.0 528-567:104.0 593-655:96.0 495-536:90.0 161-227:170.0 119-150:110.0 64-103:105.0 274-314:66.0 572-602:55.0	2861	0	1075	1.289	526	0.4893	673328 No KEGG functional class	64	849	jgi|Orpsp1_1|1188997|evm.model.d7180000068721.1	1	834	Orpinomyces sp.	Orpsp1_1_GeneCatalog_proteins_20140826.aa
Orpsp1_1|1187171	65-225:638.0 594-701:303.0 258-335:207.0 716-789:203.0 364-431:199.0 466-523:160.0 528-578:141.0 829-849:44.0 179-244:131.0 64-94:110.0 116-149:89.0 274-300:64.0 491-536:115.0 537-564:99.0 681-738:72.0 593-610:57.0	2632	0	927	1.0704	465	0.5016	673328 No KEGG functional class	64	849	jgi|Orpsp1_1|1187171|evm.model.d7180000055913.2	89	866	Orpinomyces sp.	Orpsp1_1_GeneCatalog_proteins_20140826.aa
Orpsp1_1|1185476	67-232:684.0 591-710:378.0 351-438:245.0 716-784:230.0 471-529:190.0 527-594:163.0 822-849:59.0 810-824:47.0 157-234:177.0 126-163:110.0 64-94:87.0 274-298:59.0 218-326:294.0 526-560:103.0 502-523:85.0 593-636:78.0	2989	0	995	1.132	526	0.5286	673328 No KEGG functional class	64	849	jgi|Orpsp1_1|1185476|evm.model.c7180000093935.1	95	879	Orpinomyces sp.	Orpsp1_1_GeneCatalog_proteins_20140826.aa
Orpsp1_1|1180175	67-232:681.0 589-709:375.0 351-438:244.0 712-784:239.0 471-529:189.0 529-576:162.0 574-592:57.0 157-234:186.0 126-163:110.0 64-94:87.0 274-298:59.0 218-326:294.0 526-560:103.0 502-523:85.0 593-636:78.0	2949	0	956	1.1247	523	0.5471	673328 No KEGG functional class	64	784	jgi|Orpsp1_1|1180175|evm.model.c7180000072391.1	107	835	Orpinomyces sp.	Orpsp1_1_GeneCatalog_proteins_20140826.aa
Orpsp1_1|1178323	63-225:730.0 657-788:433.0 218-329:338.0 351-441:262.0 469-535:194.0 594-659:162.0 829-843:60.0 158-245:159.0 116-150:106.0 64-94:86.0 274-332:71.0 528-560:101.0 499-523:88.0 593-636:84.0 681-734:82.0 526-591:173.0	3129	0	1081	1.3649	571	0.5282	673328 No KEGG functional class	63	843	jgi|Orpsp1_1|1178323|evm.model.c7180000064840.1	7	792	Orpinomyces sp.	Orpsp1_1_GeneCatalog_proteins_20140826.aa
Anasp1|329263	68-225:633.0 586-702:305.0 719-784:209.0 365-441:191.0 252-330:184.0 490-531:154.0 834-848:45.0 187-220:133.0 64-110:126.0 125-154:98.0 274-300:70.0 240-272:42.0 722-776:104.0 537-564:92.0 593-653:88.0 497-523:83.0 687-713:61.0 527-597:163.0	2781	0	994	1.0911	489	0.492	673328 No KEGG functional class	64	848	jgi|Anasp1|329263|fgenesh2_kg.286_#_4_#_Locus6792v1rpkm3.02	104	910	Anaeromyces robustus v1.0	Anasp1_GeneCatalog_proteins_20160330.aa
Anasp1|327418	63-225:681.0 591-783:489.0 351-431:212.0 472-534:190.0 252-326:170.0 157-227:169.0 64-103:107.0 117-150:101.0 530-567:104.0 487-536:98.0 593-636:96.0 512-568:118.0 575-597:42.0	2577	0	932	1.013	452	0.485	673328 No KEGG functional class	63	783	jgi|Anasp1|327418|fgenesh2_kg.126_#_1_#_Locus4152v1rpkm8.57	120	865	Anaeromyces robustus v1.0	Anasp1_GeneCatalog_proteins_20160330.aa
Anasp1|288110	64-246:629.0 629-703:222.0 251-330:216.0 365-432:186.0 717-783:164.0 590-636:116.0 529-561:114.0 505-530:74.0 183-229:138.0 118-149:99.0 276-332:75.0 681-772:130.0 526-560:106.0 593-631:75.0	2344	0	881	0.9303	424	0.4813	673328 No KEGG functional class	64	783	jgi|Anasp1|288110|gm1.14376_g	82	825	Anaeromyces robustus v1.0	Anasp1_GeneCatalog_proteins_20160330.aa
Anasp1|273575	64-246:629.0 629-703:222.0 251-330:216.0 365-441:194.0 717-783:164.0 590-636:116.0 529-561:114.0 505-530:74.0 183-229:138.0 118-149:99.0 276-332:75.0 681-772:130.0 526-560:106.0 593-631:75.0	2352	0	890	0.7793	427	0.4798	673328 No KEGG functional class	64	783	jgi|Anasp1|273575|estExt_fgenesh1_pg.C_7220001	88	830	Anaeromyces robustus v1.0	Anasp1_GeneCatalog_proteins_20160330.aa
PirE2_1|14525	1322-1649:1197.0 1136-1256:440.0 761-880:414.0 567-677:360.0 1036-1138:329.0 452-564:280.0 679-764:279.0 896-949:210.0 374-433:152.0 1242-1302:251.0 416-441:82.0 794-838:79.0 912-937:74.0 744-787:64.0 841-874:58.0 785-831:81.0 229-257:75.0 523-547:68.0 1130-1186:67.0 763-784:62.0 844-869:53.0	4675	0	1538	1.2053	841	0.5468	673387 No KEGG functional class	229	1649	jgi|PirE2_1|14525|gm1.13471_g	1	1276	Piromyces sp. E2 v1.0	PirE2_1_GeneCatalog_proteins_20110421.aa
PirE2_1|14522	1322-1649:1143.0 1091-1302:831.0 763-880:398.0 416-500:224.0 682-759:221.0 596-677:219.0 904-949:167.0 520-555:97.0 561-589:55.0 374-406:48.0 1049-1105:172.0 376-433:119.0 745-831:116.0 523-555:65.0 1128-1186:54.0 1448-1468:47.0 397-459:73.0 821-869:67.0 471-492:61.0 764-780:56.0 229-257:68.0 910-934:66.0 764-795:56.0 794-838:52.0	4475	0	1644	1.3141	819	0.4982	673387 No KEGG functional class	229	1649	jgi|PirE2_1|14522|gm1.13468_g	1	1251	Piromyces sp. E2 v1.0	PirE2_1_GeneCatalog_proteins_20110421.aa
Orpsp1_1|1181207	1322-1638:1227.0 1090-1302:810.0 1045-1093:159.0	2196	0	579	0.8603	388	0.6701	673387 No KEGG functional class	1045	1638	jgi|Orpsp1_1|1181207|evm.model.c7180000076302.1	78	673	Orpinomyces sp.	Orpsp1_1_GeneCatalog_proteins_20140826.aa
Orpsp1_1|1174598	1322-1641:1314.0 1033-1302:1048.0	2362	0	590	0.8263	420	0.7119	673387 No KEGG functional class	1033	1641	jgi|Orpsp1_1|1174598|evm.model.c7180000050701.1	106	714	Orpinomyces sp.	Orpsp1_1_GeneCatalog_proteins_20140826.aa
Caecom1|531898	1322-1631:1145.0 1134-1302:639.0 761-880:395.0 567-677:370.0 452-566:301.0 346-433:257.0 679-759:250.0 106-166:207.0 896-949:177.0 231-293:142.0 37-82:111.0 307-331:75.0 173-190:71.0 194-211:62.0 1-23:61.0 294-310:55.0 1035-1139:303.0 907-934:91.0 416-450:84.0 67-106:80.0 794-838:70.0 744-785:62.0 841-872:57.0 781-826:82.0 371-459:74.0 471-494:68.0 844-875:54.0 1128-1186:48.0	5391	0	1896	1.0897	972	0.5127	673387 No KEGG functional class	1	1631	jgi|Caecom1|531898|estExt_fgenesh1_pg.C_5650005	1	1717	Caecomyces churrovis A v1.0	Caecom1_GeneCatalog_proteins_20171213.aa
Caecom1|531897	1322-1649:1168.0 1089-1302:826.0 588-677:282.0 761-864:276.0 346-436:273.0 446-568:267.0 682-759:233.0 896-949:187.0 126-164:136.0 227-257:75.0 569-596:72.0 53-73:55.0 294-306:50.0 26-54:47.0 1038-1105:165.0 852-880:106.0 136-211:97.0 744-787:75.0 520-545:55.0 1201-1234:48.0 1130-1186:47.0 786-840:73.0 233-256:58.0 523-547:57.0 842-866:54.0 764-780:52.0 267-322:50.0	4884	0	1779	1.0834	886	0.498	673387 No KEGG functional class	26	1649	jgi|Caecom1|531897|estExt_fgenesh1_pg.C_5650004	25	1642	Caecomyces churrovis A v1.0	Caecom1_GeneCatalog_proteins_20171213.aa
Caecom1|453316	1322-1649:1207.0 1100-1302:812.0 761-880:382.0 416-563:350.0 682-759:236.0 106-210:229.0 896-949:194.0 566-623:170.0 627-677:160.0 1048-1100:153.0 233-268:82.0 289-331:76.0 66-106:51.0 346-433:237.0 782-831:103.0 523-546:61.0 763-784:61.0 842-869:58.0 294-307:50.0 53-84:49.0 744-798:75.0 907-937:71.0 530-564:66.0 794-870:52.0 65-80:49.0	5034	0	1790	1.1002	908	0.5073	673387 No KEGG functional class	53	1649	jgi|Caecom1|453316|fgenesh1_kg.126_#_67_#_TRINITY_DN6149_c0_g1_i1	56	1627	Caecomyces churrovis A v1.0	Caecom1_GeneCatalog_proteins_20171213.aa
Anasp1|303912	358-621:660.0 1096-1249:577.0 1447-1568:490.0 762-880:350.0 1322-1383:269.0 1578-1636:252.0 1243-1302:225.0 105-166:191.0 627-677:190.0 896-949:183.0 1033-1091:166.0 233-278:142.0 171-197:106.0 82-106:86.0 312-331:77.0 202-233:70.0 286-306:60.0 65-87:58.0 31-49:52.0 682-788:237.0 346-405:204.0 1371-1444:174.0 908-934:68.0 399-459:65.0 198-211:60.0 54-91:59.0 794-838:82.0 744-785:71.0 844-866:63.0…	5886	0	2086	1.2227	1070	0.5129	673387 No KEGG functional class	31	1636	jgi|Anasp1|303912|MIX5126_197_48	11	1699	Anaeromyces robustus v1.0	Anasp1_GeneCatalog_proteins_20160330.aa
Anasp1|290470	1325-1648:1188.0 1093-1302:821.0 762-880:384.0 573-677:336.0 682-764:246.0 416-492:223.0 345-405:214.0 497-579:196.0 896-949:183.0 1049-1091:153.0 123-167:133.0 234-293:125.0 173-197:84.0 285-326:65.0 194-210:60.0 108-125:58.0 86-99:56.0 57-80:53.0 781-830:78.0 376-433:69.0 310-331:64.0 744-786:63.0 840-869:60.0 261-304:48.0 474-495:64.0 822-838:63.0 912-934:59.0 520-546:56.0 844-872:54.0	5256	0	1769	1.043	939	0.5308	673387 No KEGG functional class	57	1648	jgi|Anasp1|290470|estExt_Genemark1.C_300042	57	1695	Anaeromyces robustus v1.0	Anasp1_GeneCatalog_proteins_20160330.aa
Anasp1|265437	1322-1649:1206.0 1090-1302:820.0 549-677:430.0 761-860:305.0 422-491:231.0 682-759:225.0 346-407:199.0 896-949:199.0 520-555:108.0 53-109:107.0 129-165:104.0 225-262:96.0 857-880:70.0 294-310:66.0 1-23:65.0 310-331:62.0 33-54:60.0 194-211:55.0 1048-1104:157.0 229-257:68.0 474-494:63.0 781-800:63.0 842-869:63.0 84-106:57.0 764-784:57.0 804-828:51.0 1126-1186:50.0 794-838:75.0 706-737:67.0 844-874:…	5291	0	1755	1.0611	947	0.5396	673387 No KEGG functional class	1	1649	jgi|Anasp1|265437|estExt_fgenesh1_pg.C_300032	1	1654	Anaeromyces robustus v1.0	Anasp1_GeneCatalog_proteins_20160330.aa
PirE2_1|14522	1156-1686:2282.0 969-1047:212.0 1108-1142:165.0 1044-1116:79.0 922-948:61.0 676-990:1063.0 462-649:631.0 658-672:42.0 832-870:75.0 908-953:73.0 603-647:69.0 872-913:66.0 230-256:62.0 546-597:54.0 1183-1241:50.0 496-539:46.0 833-874:71.0 930-972:60.0 891-926:57.0 995-1020:53.0 453-485:51.0	5322	0	1797	1.4365	985	0.5481	673388 No KEGG functional class	230	1686	jgi|PirE2_1|14522|gm1.13468_g	1	1233	Piromyces sp. E2 v1.0	PirE2_1_GeneCatalog_proteins_20110421.aa
PirE2_1|10348	1192-1362:408.0 1526-1663:340.0 1361-1485:220.0 746-827:132.0 845-882:115.0 710-752:107.0 1110-1141:97.0 1156-1192:94.0 588-629:92.0 1502-1526:90.0 554-591:87.0 1666-1679:64.0 882-942:63.0 941-976:57.0 851-882:98.0 1473-1496:69.0 463-493:64.0 586-617:59.0 550-568:55.0 936-958:49.0 1218-1244:48.0 928-970:75.0 849-908:69.0 974-1039:49.0 909-925:42.0 819-882:99.0 603-623:55.0 992-1038:49.0 902-928:4…	2942	0	1442	0.8771	556	0.3856	673388 No KEGG functional class	463	1679	jgi|PirE2_1|10348|gm1.9294_g	382	1620	Piromyces sp. E2 v1.0	PirE2_1_GeneCatalog_proteins_20110421.aa
Orpsp1_1|1181207	1074-1689:2582.0 1021-1066:140.0 1059-1116:140.0 1334-1389:61.0 1520-1533:44.0	2967	0	790	1.1738	550	0.6962	673388 No KEGG functional class	1021	1689	jgi|Orpsp1_1|1181207|evm.model.c7180000076302.1	1	669	Orpinomyces sp.	Orpsp1_1_GeneCatalog_proteins_20140826.aa
Orpsp1_1|1179578	1195-1362:466.0 1361-1467:208.0 1526-1600:179.0 770-840:143.0 1598-1649:109.0 1156-1199:107.0 849-882:94.0 1501-1526:93.0 996-1038:88.0 1104-1141:87.0 701-760:86.0 534-607:84.0 910-950:78.0 170-214:76.0 611-643:75.0 1473-1495:62.0 885-906:60.0 1665-1679:53.0 377-400:50.0 856-882:82.0 909-942:69.0 1205-1258:68.0 547-569:67.0 941-988:64.0 144-190:59.0 1255-1290:57.0 1503-1530:53.0 210-242:51.0 599-…	3143	0	1555	0.3911	596	0.3833	673388 No KEGG functional class	104	1679	jgi|Orpsp1_1|1179578|evm.model.c7180000069944.1	188	3953	Orpinomyces sp.	Orpsp1_1_GeneCatalog_proteins_20140826.aa
Orpsp1_1|1174598	1156-1689:2119.0 1104-1142:170.0	2289	0	573	0.8025	409	0.7138	673388 No KEGG functional class	1104	1689	jgi|Orpsp1_1|1174598|evm.model.c7180000050701.1	124	707	Orpinomyces sp.	Orpsp1_1_GeneCatalog_proteins_20140826.aa
Anasp1|303912	770-1061:913.0 1156-1303:584.0 1302-1438:526.0 1496-1628:514.0 496-635:409.0 1625-1689:261.0 420-484:240.0 710-770:200.0 157-243:176.0 1100-1142:173.0 679-709:109.0 114-156:96.0 276-335:91.0 373-398:74.0 350-377:70.0 88-101:69.0 655-676:59.0 1426-1495:254.0 621-657:94.0 908-953:80.0 832-867:78.0 239-256:77.0 589-625:69.0 872-916:62.0 1334-1387:48.0 930-972:67.0 891-926:65.0 477-508:64.0 808-873:5…	5679	0	1959	1.1483	1037	0.5294	673388 No KEGG functional class	88	1689	jgi|Anasp1|303912|MIX5126_197_48	42	1697	Anaeromyces robustus v1.0	Anasp1_GeneCatalog_proteins_20160330.aa
Anasp1|295759	1195-1362:451.0 1526-1664:329.0 1361-1480:195.0 746-826:158.0 830-882:157.0 710-753:108.0 1156-1199:102.0 1502-1526:96.0 588-629:87.0 533-558:81.0 1110-1141:80.0 1015-1055:59.0 882-950:58.0 1666-1679:58.0 144-190:52.0 1473-1496:51.0 588-647:87.0 851-882:71.0 506-543:63.0 1361-1385:60.0 159-180:52.0 941-969:50.0 847-880:65.0 909-950:65.0 947-974:51.0 993-1012:42.0 916-959:83.0 848-871:65.0 554-573…	3034	0	1497	0.7338	572	0.3821	673388 No KEGG functional class	144	1679	jgi|Anasp1|295759|estExt_Genemark1.C_2590012	294	1533	Anaeromyces robustus v1.0	Anasp1_GeneCatalog_proteins_20160330.aa
Anasp1|290470	1156-1689:2184.0 679-1053:1190.0 477-572:318.0 419-484:216.0 573-635:194.0 1109-1142:154.0 350-397:131.0 167-205:120.0 273-336:115.0 126-156:88.0 239-254:67.0 64-73:53.0 621-676:147.0 832-871:77.0 926-953:68.0 589-625:62.0 554-572:52.0 869-919:50.0 1334-1389:50.0 930-975:71.0 891-926:54.0 998-1020:44.0	5505	0	1768	1.0425	989	0.5594	673388 No KEGG functional class	64	1689	jgi|Anasp1|290470|estExt_Genemark1.C_300042	43	1681	Anaeromyces robustus v1.0	Anasp1_GeneCatalog_proteins_20160330.aa
Anasp1|270788	1187-1362:432.0 1526-1664:311.0 746-912:301.0 1361-1485:205.0 705-753:124.0 1502-1526:92.0 1156-1188:89.0 588-630:87.0 534-574:79.0 1110-1141:75.0 1015-1038:65.0 309-332:54.0 1666-1686:54.0 941-969:53.0 651-667:51.0 850-871:79.0 895-961:74.0 1473-1496:58.0 1361-1385:55.0 1216-1269:52.0 239-253:50.0 603-642:72.0 103-179:71.0 728-750:57.0 788-817:56.0 370-403:46.0 533-558:66.0 888-916:60.0 908-972:…	3115	0	1600	0.9963	583	0.3644	673388 No KEGG functional class	103	1686	jgi|Anasp1|270788|estExt_fgenesh1_pg.C_2590006	269	1586	Anaeromyces robustus v1.0	Anasp1_GeneCatalog_proteins_20160330.aa
Anasp1|265437	1101-1688:2520.0 676-947:996.0 947-1059:372.0 578-658:268.0 501-574:239.0 425-486:195.0 172-211:124.0 222-256:98.0 1066-1111:83.0 376-410:77.0 88-104:75.0 351-367:66.0 62-75:62.0 660-676:58.0 1334-1389:54.0 1520-1533:47.0 833-882:75.0 926-953:73.0 578-642:72.0 231-259:68.0 551-580:57.0 178-201:53.0 1181-1241:49.0 200-215:48.0 833-872:72.0 947-975:68.0 599-622:60.0 881-926:60.0 193-237:50.0	6139	0	1968	1.1898	1129	0.5737	673388 No KEGG functional class	62	1688	jgi|Anasp1|265437|estExt_fgenesh1_pg.C_300032	47	1638	Anaeromyces robustus v1.0	Anasp1_GeneCatalog_proteins_20160330.aa
Piromy_p0_1|525569	124-452:1497.0 1-55:229.0 66-96:155.0 28-53:107.0 18-34:59.0 68-93:111.0 199-223:54.0	2212	0	509	1.1138	371	0.7289	673436 No KEGG functional class	1	452	jgi|Piromy_p0_1|525569|fgenesh2_kg.chromosome_3___2055___TRINITY_DN8858_c8_g9_i6	1	457	Piromyces sp. UH3-1 v2.0	Piromy_p0_1_GeneCatalog_proteins_20200513.aa
Pecora1|3273	153-452:1440.0 29-54:115.0 58-80:104.0 116-162:152.0 67-96:111.0	1922	0	426	1.0785	319	0.7488	673436 No KEGG functional class	29	452	jgi|Pecora1|3273|allA03279	4	394	Pecoramyces sp. F1	Pecora1_ExternalModels_proteins_2021-11-19.fasta
Pecora1|2934	112-298:926.0 297-451:771.0 1-54:246.0 54-95:218.0 68-96:125.0 28-53:106.0 67-93:44.0	2436	0	520	1.1379	411	0.7904	673436 No KEGG functional class	1	451	jgi|Pecora1|2934|allA02926	1	455	Pecoramyces sp. F1	Pecora1_ExternalModels_proteins_2021-11-19.fasta
Orpsp1_1|1183643	181-452:1296.0 116-162:152.0 153-190:138.0	1586	0	357	1.0288	269	0.7535	673436 No KEGG functional class	116	452	jgi|Orpsp1_1|1183643|evm.model.c7180000086096.1	12	347	Orpinomyces sp.	Orpsp1_1_GeneCatalog_proteins_20140826.aa
Orpsp1_1|1181857	112-298:926.0 297-451:771.0 1-54:247.0 54-95:218.0 68-96:126.0 28-53:106.0 67-93:44.0	2438	0	520	1.1404	413	0.7942	673436 No KEGG functional class	1	451	jgi|Orpsp1_1|1181857|evm.model.c7180000078893.2	1	455	Orpinomyces sp.	Orpsp1_1_GeneCatalog_proteins_20140826.aa
Orpsp1_1|1179810	181-452:1296.0 116-162:152.0 153-190:138.0	1586	0	357	1.0288	269	0.7535	673436 No KEGG functional class	116	452	jgi|Orpsp1_1|1179810|evm.model.c7180000070825.1	12	347	Orpinomyces sp.	Orpsp1_1_GeneCatalog_proteins_20140826.aa
Neosp1|673436	1-452:2501.0 68-93:118.0 28-53:118.0	2737	0	504	1.115	476	0.9444	673436 No KEGG functional class	1	452	jgi|Neosp1|673436|estExt_fgenesh1_pg.C_1620006	1	452	Neocallimastix californiae G1 v1.0	Neosp1_GeneCatalog_proteins_20170918.aa
Neosp1|456134	116-451:1795.0 1-95:449.0 28-53:117.0 112-128:58.0 68-93:117.0 199-223:50.0	2586	0	525	1.1538	443	0.8438	673436 No KEGG functional class	1	451	jgi|Neosp1|456134|estExt_Genewise1Plus.C_870121	1	454	Neocallimastix californiae G1 v1.0	Neosp1_GeneCatalog_proteins_20170918.aa
Neolan1|1003974	116-451:1795.0 1-95:449.0 28-53:117.0 112-128:58.0 68-93:117.0 199-223:50.0	2586	0	525	1.1538	443	0.8438	673436 No KEGG functional class	1	451	jgi|Neolan1|1003974|estExt_Genewise1.C_880023	1	454	Neocallimastix lanati v1.0	Neolan1_GeneCatalog_proteins_20200610.aa
Caecom1|417014	236-452:999.0 1-96:409.0 141-189:209.0 192-235:198.0 116-138:51.0 28-53:113.0 68-93:108.0 199-223:44.0	2131	0	506	1.1072	353	0.6976	673436 No KEGG functional class	1	452	jgi|Caecom1|417014|estExt_Genewise1.C_570005	1	457	Caecomyces churrovis A v1.0	Caecom1_GeneCatalog_proteins_20171213.aa
Pecora1|11488	213-361:549.0 453-522:236.0 620-679:235.0 529-578:162.0 82-127:144.0 356-416:140.0 20-58:137.0 137-181:122.0 677-692:73.0 418-437:69.0 180-193:55.0 699-714:55.0 682-723:173.0 413-439:55.0	2205	0	655	0.7529	382	0.5832	673656 No KEGG functional class	20	723	jgi|Pecora1|11488|allA11840	21	860	Pecoramyces sp. F1	Pecora1_ExternalModels_proteins_2021-11-19.fasta
Pecora1|2906	214-361:547.0 626-677:243.0 461-522:236.0 529-582:146.0 20-61:144.0 356-416:135.0 82-119:117.0 136-175:100.0 418-441:78.0 674-692:73.0 699-713:54.0 676-723:174.0 413-440:59.0	2106	0	631	0.7397	363	0.5753	673656 No KEGG functional class	20	723	jgi|Pecora1|2906|allA02956	21	840	Pecoramyces sp. F1	Pecora1_ExternalModels_proteins_2021-11-19.fasta
Orpsp1_1|1184152	213-361:547.0 448-522:243.0 620-679:235.0 529-578:160.0 82-127:144.0 356-403:122.0 26-58:121.0 137-176:118.0 677-692:73.0 699-714:55.0 180-193:54.0 682-723:173.0	2045	0	589	0.7192	353	0.5993	673656 No KEGG functional class	26	723	jgi|Orpsp1_1|1184152|evm.model.c7180000088232.1	1	810	Orpinomyces sp.	Orpsp1_1_GeneCatalog_proteins_20140826.aa
Orpsp1_1|1184037	214-361:547.0 626-677:243.0 461-522:236.0 529-582:143.0 20-61:141.0 356-416:130.0 82-119:117.0 136-168:100.0 418-441:78.0 674-692:73.0 699-713:54.0 676-723:174.0 413-440:59.0	2095	0	624	0.7437	361	0.5785	673656 No KEGG functional class	20	723	jgi|Orpsp1_1|1184037|evm.model.c7180000087751.1	8	827	Orpinomyces sp.	Orpsp1_1_GeneCatalog_proteins_20140826.aa
Orpsp1_1|1183044	213-361:554.0 448-522:254.0 620-671:203.0 20-57:145.0 529-582:142.0 356-409:141.0 82-121:129.0 130-188:108.0 680-692:76.0 699-713:54.0 670-723:176.0 518-546:51.0	2033	0	632	0.7689	357	0.5649	673656 No KEGG functional class	20	723	jgi|Orpsp1_1|1183044|evm.model.c7180000083647.1	8	810	Orpinomyces sp.	Orpsp1_1_GeneCatalog_proteins_20140826.aa
Neosp1|678784	213-361:560.0 356-458:274.0 450-521:245.0 618-680:230.0 83-156:165.0 544-581:126.0 35-59:96.0 679-692:73.0 699-714:57.0 166-196:48.0 682-722:167.0 82-118:129.0 136-159:71.0 326-359:56.0 82-119:108.0 135-161:79.0 702-721:55.0 628-638:53.0 82-156:131.0 644-660:52.0	2775	0	909	0.7932	493	0.5424	673656 No KEGG functional class	35	722	jgi|Neosp1|678784|estExt_fgenesh1_pg.C_5520003	2	1139	Neocallimastix californiae G1 v1.0	Neosp1_GeneCatalog_proteins_20170918.aa
Neosp1|676636	213-437:827.0 82-194:252.0 452-521:219.0 617-673:218.0 20-60:165.0 544-581:114.0 678-692:79.0 699-714:58.0 82-188:245.0 676-720:153.0 83-159:223.0 702-721:55.0 628-638:50.0 83-161:218.0 645-660:52.0 82-200:183.0 82-121:119.0 136-158:68.0	3298	0	1112	0.7345	599	0.5387	673656 No KEGG functional class	20	721	jgi|Neosp1|676636|estExt_fgenesh1_pg.C_2820015	21	1510	Neocallimastix californiae G1 v1.0	Neosp1_GeneCatalog_proteins_20170918.aa
Neosp1|676635	213-439:837.0 82-188:249.0 617-673:228.0 20-60:168.0 541-580:119.0 678-692:79.0 505-521:65.0 699-714:58.0 82-177:246.0 676-720:163.0 82-177:232.0 702-721:55.0 628-638:50.0 82-161:222.0 645-660:52.0 82-159:218.0 83-161:216.0 82-122:123.0 136-158:67.0	3447	0	1105	0.6527	620	0.5611	673656 No KEGG functional class	20	721	jgi|Neosp1|676635|estExt_fgenesh1_pg.C_2820013	21	1689	Neocallimastix californiae G1 v1.0	Neosp1_GeneCatalog_proteins_20170918.aa
Neosp1|673656	81-585:2619.0 608-723:675.0 1-62:268.0 681-723:154.0 627-669:154.0	3870	0	769	1.0636	713	0.9272	673656 No KEGG functional class	1	723	jgi|Neosp1|673656|estExt_fgenesh1_pg.C_1690003	1	723	Neocallimastix californiae G1 v1.0	Neosp1_GeneCatalog_proteins_20170918.aa
Neosp1|512440	234-580:1683.0 81-192:555.0 13-62:254.0	2492	0	509	0.8613	468	0.9194	673656 No KEGG functional class	13	580	jgi|Neosp1|512440|fgenesh1_pg.169_#_2	2	522	Neocallimastix californiae G1 v1.0	Neosp1_GeneCatalog_proteins_20170918.aa
PirE2_1|20421	68-550:2024.0	2024	0	483	0.8519	364	0.7536	674165 No KEGG functional class	68	550	jgi|PirE2_1|20421|estExt_Genemark1.C_1010025	85	567	Piromyces sp. E2 v1.0	PirE2_1_GeneCatalog_proteins_20110421.aa
Pecora1|6716	68-550:2086.0	2086	0	483	0.8944	373	0.7723	674165 No KEGG functional class	68	550	jgi|Pecora1|6716|allA06809	57	539	Pecoramyces sp. F1	Pecora1_ExternalModels_proteins_2021-11-19.fasta
Neosp1|674166	68-550:2428.0 1-27:69.0	2497	0	510	0.9273	470	0.9216	674165 No KEGG functional class	1	550	jgi|Neosp1|674166|estExt_fgenesh1_pg.C_1870019	1	550	Neocallimastix californiae G1 v1.0	Neosp1_GeneCatalog_proteins_20170918.aa
Neosp1|674165	68-550:2509.0 1-27:73.0	2582	0	510	0.9273	486	0.9529	674165 No KEGG functional class	1	550	jgi|Neosp1|674165|estExt_fgenesh1_pg.C_1870018	1	550	Neocallimastix californiae G1 v1.0	Neosp1_GeneCatalog_proteins_20170918.aa
Neosp1|513182	68-550:2433.0 1-27:68.0	2501	0	510	0.929	469	0.9196	674165 No KEGG functional class	1	550	jgi|Neosp1|513182|fgenesh1_pg.187_#_21	1	549	Neocallimastix californiae G1 v1.0	Neosp1_GeneCatalog_proteins_20170918.aa
Neosp1|90905	68-550:2461.0 1-27:70.0	2531	0	510	0.929	473	0.9275	674165 No KEGG functional class	1	550	jgi|Neosp1|90905|CE90904_2647	1	549	Neocallimastix californiae G1 v1.0	Neosp1_GeneCatalog_proteins_20170918.aa
Neosp1|90897	68-550:2479.0 1-27:73.0	2552	0	510	0.929	477	0.9353	674165 No KEGG functional class	1	550	jgi|Neosp1|90897|CE90896_9367	1	549	Neocallimastix californiae G1 v1.0	Neosp1_GeneCatalog_proteins_20170918.aa
Neosp1|90890	78-550:2388.0	2388	0	473	1	447	0.945	674165 No KEGG functional class	78	550	jgi|Neosp1|90890|CE90889_299	1	473	Neocallimastix californiae G1 v1.0	Neosp1_GeneCatalog_proteins_20170918.aa
Caecom1|593371	68-239:784.0 243-387:658.0 387-550:595.0	2037	0	481	0.9877	361	0.7505	674165 No KEGG functional class	68	550	jgi|Caecom1|593371|MIX20767_150_99	2	487	Caecomyces churrovis A v1.0	Caecom1_GeneCatalog_proteins_20171213.aa
Caecom1|250068	82-550:2045.0	2045	0	469	0.6021	363	0.774	674165 No KEGG functional class	82	550	jgi|Caecom1|250068|CE250067_121265	311	779	Caecomyces churrovis A v1.0	Caecom1_GeneCatalog_proteins_20171213.aa
PirE2_1|20421	68-550:2004.0	2004	0	483	0.8519	359	0.7433	674166 No KEGG functional class	68	550	jgi|PirE2_1|20421|estExt_Genemark1.C_1010025	85	567	Piromyces sp. E2 v1.0	PirE2_1_GeneCatalog_proteins_20110421.aa
Pecora1|6716	46-550:2081.0	2081	0	505	0.9352	372	0.7366	674166 No KEGG functional class	46	550	jgi|Pecora1|6716|allA06809	35	539	Pecoramyces sp. F1	Pecora1_ExternalModels_proteins_2021-11-19.fasta
Neosp1|674166	1-550:2707.0	2707	0	550	1	513	0.9327	674166 No KEGG functional class	1	550	jgi|Neosp1|674166|estExt_fgenesh1_pg.C_1870019	1	550	Neocallimastix californiae G1 v1.0	Neosp1_GeneCatalog_proteins_20170918.aa
Neosp1|674165	1-550:2593.0	2593	0	550	1	491	0.8927	674166 No KEGG functional class	1	550	jgi|Neosp1|674165|estExt_fgenesh1_pg.C_1870018	1	550	Neocallimastix californiae G1 v1.0	Neosp1_GeneCatalog_proteins_20170918.aa
Neosp1|513182	50-550:2467.0 1-52:107.0	2574	0	553	1.0073	485	0.877	674166 No KEGG functional class	1	550	jgi|Neosp1|513182|fgenesh1_pg.187_#_21	1	549	Neocallimastix californiae G1 v1.0	Neosp1_GeneCatalog_proteins_20170918.aa
Neosp1|90905	54-550:2488.0 1-51:104.0	2592	0	548	0.9982	490	0.8942	674166 No KEGG functional class	1	550	jgi|Neosp1|90905|CE90904_2647	1	549	Neocallimastix californiae G1 v1.0	Neosp1_GeneCatalog_proteins_20170918.aa
Neosp1|90897	50-550:2502.0 1-52:107.0	2609	0	553	1.0073	495	0.8951	674166 No KEGG functional class	1	550	jgi|Neosp1|90897|CE90896_9367	1	549	Neocallimastix californiae G1 v1.0	Neosp1_GeneCatalog_proteins_20170918.aa
Neosp1|90890	78-550:2415.0	2415	0	473	1	452	0.9556	674166 No KEGG functional class	78	550	jgi|Neosp1|90890|CE90889_299	1	473	Neocallimastix californiae G1 v1.0	Neosp1_GeneCatalog_proteins_20170918.aa
Caecom1|593371	67-239:770.0 243-387:633.0 387-550:590.0	1993	0	482	0.9897	355	0.7365	674166 No KEGG functional class	67	550	jgi|Caecom1|593371|MIX20767_150_99	1	487	Caecomyces churrovis A v1.0	Caecom1_GeneCatalog_proteins_20171213.aa
Caecom1|250068	82-550:2017.0	2017	0	469	0.6021	357	0.7612	674166 No KEGG functional class	82	550	jgi|Caecom1|250068|CE250067_121265	311	779	Caecomyces churrovis A v1.0	Caecom1_GeneCatalog_proteins_20171213.aa
Piromy_p0_1|446338	359-532:616.0 597-738:397.0 194-284:353.0 82-138:195.0 27-82:154.0 147-196:145.0 291-338:118.0 563-595:105.0	2083	0	651	0.6302	359	0.5515	674402 No KEGG functional class	27	738	jgi|Piromy_p0_1|446338|estExt_fgenesh1_pg.C_chromosome_9_t20345	22	752	Piromyces sp. UH3-1 v2.0	Piromy_p0_1_GeneCatalog_proteins_20200513.aa
PirE2_1|63311	360-532:583.0 597-737:420.0 82-138:201.0 238-284:201.0 147-204:154.0 28-82:146.0 291-338:118.0 559-595:108.0	1931	0	616	0.6022	342	0.5552	674402 No KEGG functional class	28	737	jgi|PirE2_1|63311|fgenesh1_pg.304_#_6	4	713	Piromyces sp. E2 v1.0	PirE2_1_GeneCatalog_proteins_20110421.aa
Pecora1|7977	352-549:757.0 142-338:727.0 25-144:423.0 544-738:617.0 776-811:52.0	2576	0	746	0.7292	477	0.6394	674402 No KEGG functional class	25	811	jgi|Pecora1|7977|allA08152	20	778	Pecoramyces sp. F1	Pecora1_ExternalModels_proteins_2021-11-19.fasta
Orpsp1_1|1187808	142-338:727.0 352-477:528.0 25-144:423.0	1678	0	443	0.9466	312	0.7043	674402 No KEGG functional class	25	477	jgi|Orpsp1_1|1187808|evm.model.d7180000060312.1	20	468	Orpinomyces sp.	Orpsp1_1_GeneCatalog_proteins_20140826.aa
NeoWI3_1|948007	25-339:1513.0 352-534:864.0 548-683:624.0 682-738:285.0 773-803:81.0 2-18:59.0 530-556:79.0 773-815:79.0	3584	0	809	0.9963	671	0.8294	674402 No KEGG functional class	2	815	jgi|NeoWI3_1|948007|fgenesh2_kg.99___97___TRINITY_DN9466_c0_g1_i1	1	812	Neocallimastix sp. WI3-B v1.0	NeoWI3_1_GeneCatalog_proteins_20201119.aa
Neosp1|701292	356-550:781.0 158-344:696.0 598-738:525.0 25-145:433.0 559-597:159.0	2594	0	683	0.7597	476	0.6969	674402 No KEGG functional class	25	738	jgi|Neosp1|701292|fgenesh2_kg.62_#_16_#_Locus13574v1rpkm1.46	19	720	Neocallimastix californiae G1 v1.0	Neosp1_GeneCatalog_proteins_20170918.aa
Neosp1|674402	1-738:3843.0 773-815:210.0	4053	0	781	0.9583	775	0.9923	674402 No KEGG functional class	1	815	jgi|Neosp1|674402|estExt_fgenesh1_pg.C_1940023	1	815	Neocallimastix californiae G1 v1.0	Neosp1_GeneCatalog_proteins_20170918.aa
Neolan1|1331981	1-738:3843.0 773-815:207.0	4050	0	781	0.8592	774	0.991	674402 No KEGG functional class	1	815	jgi|Neolan1|1331981|gm4.11591_g	43	857	Neocallimastix lanati v1.0	Neolan1_GeneCatalog_proteins_20200610.aa
Neolan1|1051333	25-344:1172.0 356-550:781.0 598-738:525.0 559-597:159.0	2637	0	695	0.7621	484	0.6964	674402 No KEGG functional class	25	738	jgi|Neolan1|1051333|estExt_Genewise1Plus.C_850102	19	732	Neocallimastix lanati v1.0	Neolan1_GeneCatalog_proteins_20200610.aa
Caecom1|595725	359-530:557.0 597-738:382.0 213-284:258.0 82-143:211.0 151-208:176.0 25-82:139.0 561-602:125.0 288-343:123.0	1971	0	662	0.7126	363	0.5483	674402 No KEGG functional class	25	738	jgi|Caecom1|595725|MIX23121_1998_100	19	776	Caecomyces churrovis A v1.0	Caecom1_GeneCatalog_proteins_20171213.aa
Piromy_p0_1|535856	95-217:290.0 216-270:124.0 271-321:122.0 51-86:70.0 1-40:50.0	656	1.52e-60	305	0.7279	123	0.4033	674414 No KEGG functional class	1	321	jgi|Piromy_p0_1|535856|fgenesh2_kg.chromosome_6___2522___TRINITY_DN8926_c4_g5_i1	15	419	Piromyces sp. UH3-1 v2.0	Piromy_p0_1_GeneCatalog_proteins_20200513.aa
Piromy_p0_1|150836	95-217:293.0 216-270:130.0 275-321:115.0 51-89:75.0 1-40:55.0	668	3.75e-62	304	0.7255	129	0.4243	674414 No KEGG functional class	1	321	jgi|Piromy_p0_1|150836|CE150835_12518	15	419	Piromyces sp. UH3-1 v2.0	Piromy_p0_1_GeneCatalog_proteins_20200513.aa
Pecora1|5368	116-200:288.0 218-323:239.0 1-16:62.0 17-40:56.0	645	9.11e-64	231	0.5593	120	0.5195	674414 No KEGG functional class	1	323	jgi|Pecora1|5368|allA05480	1	409	Pecoramyces sp. F1	Pecora1_ExternalModels_proteins_2021-11-19.fasta
Neosp1|674414	1-323:1681.0	1681	0	323	1	323	1	674414 No KEGG functional class	1	323	jgi|Neosp1|674414|estExt_fgenesh1_pg.C_1950035	1	323	Neocallimastix californiae G1 v1.0	Neosp1_GeneCatalog_proteins_20170918.aa
Neosp1|212604	214-323:592.0 16-120:494.0 116-200:427.0	1513	0	300	0.7229	289	0.9633	674414 No KEGG functional class	16	323	jgi|Neosp1|212604|CE212603_2551	30	415	Neocallimastix californiae G1 v1.0	Neosp1_GeneCatalog_proteins_20170918.aa
Neolan1|1618176	214-323:592.0 16-120:494.0 116-200:427.0	1513	0	300	0.7229	289	0.9633	674414 No KEGG functional class	16	323	jgi|Neolan1|1618176|fgenesh2_kg.1___2931___TRINITY_DN2381_c0_g1_i1	30	415	Neocallimastix lanati v1.0	Neolan1_GeneCatalog_proteins_20200610.aa
Caecom1|624272	116-218:290.0 213-294:182.0 301-321:84.0 38-90:66.0 89-104:44.0	666	6.58e-62	275	0.6322	121	0.44	674414 No KEGG functional class	38	321	jgi|Caecom1|624272|estExt_Genemark1.C_1900018	62	435	Caecomyces churrovis A v1.0	Caecom1_GeneCatalog_proteins_20171213.aa
Caecom1|624271	97-217:288.0 213-288:156.0 65-90:94.0 301-321:82.0 1-15:51.0	671	1.31e-62	259	0.6051	123	0.4749	674414 No KEGG functional class	1	321	jgi|Caecom1|624271|estExt_Genemark1.C_1900017	1	428	Caecomyces churrovis A v1.0	Caecom1_GeneCatalog_proteins_20171213.aa
Caecom1|456299	95-218:304.0 213-294:205.0 67-90:77.0 1-60:66.0 294-320:64.0	716	1.27e-68	317	0.7321	137	0.4322	674414 No KEGG functional class	1	320	jgi|Caecom1|456299|fgenesh1_kg.190_#_12_#_TRINITY_DN8011_c10_g1_i1	1	432	Caecomyces churrovis A v1.0	Caecom1_GeneCatalog_proteins_20171213.aa
Caecom1|73106	95-218:291.0 212-294:178.0 70-90:74.0 301-321:64.0 1-16:48.0 39-75:48.0	703	2.29e-62	302	0.6537	132	0.4371	674414 No KEGG functional class	1	321	jgi|Caecom1|73106|CE73105_750	1	462	Caecomyces churrovis A v1.0	Caecom1_GeneCatalog_proteins_20171213.aa
Pirfi3|374676	100-336:810.0 32-74:123.0	933	5.15e-113	280	0.8284	167	0.5964	674864 No KEGG functional class	32	336	jgi|Pirfi3|374676|fgenesh1_pg.69_#_37	11	332	Piromyces finnis v3.0	Pirfi3_GeneCatalog_proteins_20160330.aa
Pecora1|732	102-336:985.0 10-77:194.0	1179	2.85e-147	303	0.8707	212	0.6997	674864 No KEGG functional class	10	336	jgi|Pecora1|732|allA00749	9	342	Pecoramyces sp. F1	Pecora1_ExternalModels_proteins_2021-11-19.fasta
Orpsp1_1|1183103	102-336:985.0 10-77:194.0	1179	2.4e-147	303	0.8732	212	0.6997	674864 No KEGG functional class	10	336	jgi|Orpsp1_1|1183103|evm.model.c7180000083867.1	9	342	Orpinomyces sp.	Orpsp1_1_GeneCatalog_proteins_20140826.aa
NeoWI3_1|871344	69-336:1304.0 1-104:279.0	1583	8.73e-170	372	1.1171	292	0.7849	674864 No KEGG functional class	1	336	jgi|NeoWI3_1|871344|MIX54453_4_50	1	331	Neocallimastix sp. WI3-B v1.0	NeoWI3_1_GeneCatalog_proteins_20201119.aa
Neosp1|674864	1-338:1818.0	1818	0	338	1	338	1	674864 No KEGG functional class	1	338	jgi|Neosp1|674864|estExt_fgenesh1_pg.C_2120014	1	338	Neocallimastix californiae G1 v1.0	Neosp1_GeneCatalog_proteins_20170918.aa
Neosp1|619895	66-245:752.0 1-64:224.0 294-336:124.0	1100	1.42e-119	287	1.0399	201	0.7003	674864 No KEGG functional class	1	336	jgi|Neosp1|619895|MIX1036_2_36	1	269	Neocallimastix californiae G1 v1.0	Neosp1_GeneCatalog_proteins_20170918.aa
Neolan1|1420928	66-336:1099.0 1-64:224.0	1323	1.09e-166	335	0.997	239	0.7134	674864 No KEGG functional class	1	336	jgi|Neolan1|1420928|estExt_Genemark4.C_190174	1	329	Neocallimastix lanati v1.0	Neolan1_GeneCatalog_proteins_20200610.aa
Neolan1|52218	1-338:1818.0	1818	0	338	1	338	1	674864 No KEGG functional class	1	338	jgi|Neolan1|52218|CE52217_836	1	338	Neocallimastix lanati v1.0	Neolan1_GeneCatalog_proteins_20200610.aa
NeoGfMa1|449026	69-336:1304.0 1-104:279.0	1583	8.83e-170	372	1.1171	292	0.7849	674864 No KEGG functional class	1	336	jgi|NeoGfMa1|449026|fgenesh1_pg.121_#_33	1	331	Neocallimastix sp. Gf-Ma3-1 v1.0	NeoGfMa1_GeneCatalog_proteins_20201119.aa
Anasp1|295543	93-336:843.0 40-76:85.0 82-98:65.0	993	4.4e-117	298	0.4197	181	0.6074	674864 No KEGG functional class	40	336	jgi|Anasp1|295543|estExt_Genemark1.C_2430011	398	701	Anaeromyces robustus v1.0	Anasp1_GeneCatalog_proteins_20160330.aa
PirE2_1|64379	52-341:1388.0 340-487:601.0	1989	0	438	1.0023	351	0.8014	675079 No KEGG functional class	52	487	jgi|PirE2_1|64379|fgenesh1_pg.444_#_4	1	435	Piromyces sp. E2 v1.0	PirE2_1_GeneCatalog_proteins_20110421.aa
PirE2_1|60141	22-487:2304.0	2304	0	466	0.8809	409	0.8777	675079 No KEGG functional class	22	487	jgi|PirE2_1|60141|fgenesh1_pg.91_#_19	62	527	Piromyces sp. E2 v1.0	PirE2_1_GeneCatalog_proteins_20110421.aa
PirE2_1|13865	25-487:2000.0	2000	0	463	0.759	347	0.7495	675079 No KEGG functional class	25	487	jgi|PirE2_1|13865|gm1.12811_g	147	609	Piromyces sp. E2 v1.0	PirE2_1_GeneCatalog_proteins_20110421.aa
PirE2_1|7747	11-488:2285.0	2285	0	478	0.9856	406	0.8494	675079 No KEGG functional class	11	488	jgi|PirE2_1|7747|gm1.6693_g	8	485	Piromyces sp. E2 v1.0	PirE2_1_GeneCatalog_proteins_20110421.aa
Orpsp1_1|1187390	22-487:2227.0	2227	0	466	0.8161	392	0.8412	675079 No KEGG functional class	22	487	jgi|Orpsp1_1|1187390|evm.model.d7180000057354.2	104	569	Orpinomyces sp.	Orpsp1_1_GeneCatalog_proteins_20140826.aa
Orpsp1_1|1180013	113-487:1521.0	1521	0	375	0.9973	260	0.6933	675079 No KEGG functional class	113	487	jgi|Orpsp1_1|1180013|evm.model.c7180000071787.2	1	375	Orpinomyces sp.	Orpsp1_1_GeneCatalog_proteins_20140826.aa
Neosp1|675079	1-488:2662.0	2662	0	488	1	488	1	675079 No KEGG functional class	1	488	jgi|Neosp1|675079|estExt_fgenesh1_pg.C_2190004	1	488	Neocallimastix californiae G1 v1.0	Neosp1_GeneCatalog_proteins_20170918.aa
Neosp1|664568	1-488:2603.0	2603	0	488	1	474	0.9713	675079 No KEGG functional class	1	488	jgi|Neosp1|664568|estExt_fgenesh1_pg.C_130060	1	488	Neocallimastix californiae G1 v1.0	Neosp1_GeneCatalog_proteins_20170918.aa
Caecom1|443826	231-487:1089.0 25-232:881.0	1970	0	465	0.7573	339	0.729	675079 No KEGG functional class	25	487	jgi|Caecom1|443826|fgenesh1_kg.9_#_137_#_TRINITY_DN8169_c7_g1_i1	150	613	Caecomyces churrovis A v1.0	Caecom1_GeneCatalog_proteins_20171213.aa
Anasp1|247635	25-487:1919.0	1919	0	463	0.9061	328	0.7084	675079 No KEGG functional class	25	487	jgi|Anasp1|247635|fgenesh1_pg.233_#_15	48	510	Anaeromyces robustus v1.0	Anasp1_GeneCatalog_proteins_20160330.aa
Orpsp1_1|1188497	955-1237:829.0 1342-1445:284.0 1270-1340:157.0 755-800:122.0 1440-1488:114.0 676-725:97.0 448-505:85.0 614-658:81.0 831-870:79.0 510-540:66.0 919-934:54.0 1246-1284:90.0 396-450:79.0 832-882:79.0 773-828:76.0 311-352:61.0 442-486:53.0 978-991:49.0 1055-1092:49.0 1350-1363:47.0 281-364:79.0 443-492:72.0 849-916:72.0 1305-1355:60.0 798-861:79.0 755-774:58.0 460-483:53.0 395-417:49.0 1057-1071:48.0	3121	0	1546	1.2662	590	0.3816	675183 No KEGG functional class	281	1488	jgi|Orpsp1_1|1188497|evm.model.d7180000065272.1	11	1162	Orpinomyces sp.	Orpsp1_1_GeneCatalog_proteins_20140826.aa
Orpsp1_1|1182987	948-1342:1166.0 1340-1449:257.0 672-729:117.0 755-793:95.0 511-543:89.0 831-870:86.0 614-659:78.0 310-352:76.0 870-916:74.0 798-828:65.0 198-230:53.0 1440-1484:140.0 773-832:91.0 832-876:76.0 396-431:73.0 1248-1281:60.0 1344-1367:58.0 442-484:55.0 284-298:50.0 311-353:50.0 515-538:47.0 400-434:71.0 1055-1104:58.0 307-329:57.0 337-377:56.0 699-720:52.0 1177-1221:46.0	3196	0	1460	0.6784	580	0.3973	675183 No KEGG functional class	198	1484	jgi|Orpsp1_1|1182987|evm.model.c7180000083385.1	658	2097	Orpinomyces sp.	Orpsp1_1_GeneCatalog_proteins_20140826.aa
Orpsp1_1|1179643	948-1350:1160.0 1440-1484:140.0 672-729:116.0 755-793:104.0 831-870:93.0 614-659:84.0 870-916:74.0 798-828:69.0 919-944:47.0 1340-1449:256.0 773-832:93.0 832-876:77.0 417-462:55.0 1101-1136:55.0 1055-1104:54.0 305-330:50.0 400-434:71.0 730-782:60.0 1248-1281:58.0 1344-1367:55.0 337-365:52.0 1197-1235:47.0 236-249:44.0	2914	0	1336	1.3163	523	0.3915	675183 No KEGG functional class	236	1484	jgi|Orpsp1_1|1179643|evm.model.c7180000070165.1	51	955	Orpinomyces sp.	Orpsp1_1_GeneCatalog_proteins_20140826.aa
Orpsp1_1|1179578	948-1342:1151.0 1340-1449:260.0 672-729:117.0 755-793:102.0 831-870:95.0 511-543:90.0 194-246:78.0 614-659:77.0 870-916:74.0 310-371:68.0 274-317:67.0 798-828:66.0 919-944:48.0 1440-1484:140.0 773-832:89.0 396-431:78.0 832-876:77.0 338-371:64.0 1248-1281:60.0 1344-1367:58.0 442-484:53.0 311-325:52.0 515-538:51.0 760-790:83.0 458-489:73.0 812-849:71.0 396-432:68.0 1055-1104:53.0 400-434:71.0 337-3…	3554	0	1622	0.4079	643	0.3964	675183 No KEGG functional class	194	1484	jgi|Orpsp1_1|1179578|evm.model.c7180000069944.1	292	3916	Orpinomyces sp.	Orpsp1_1_GeneCatalog_proteins_20140826.aa
Orpsp1_1|1178370	933-1334:1135.0 669-760:127.0 799-877:119.0 624-657:101.0 350-419:86.0 764-806:78.0 429-482:73.0 194-231:48.0 895-947:135.0 755-799:83.0 394-421:73.0 510-535:67.0 1062-1137:65.0 343-377:50.0 831-843:48.0 979-991:46.0 460-483:68.0 304-352:67.0 841-854:62.0 351-367:59.0 1327-1355:56.0 510-538:55.0 172-188:45.0 461-483:70.0 504-542:64.0 1271-1300:55.0 776-802:53.0	2988	0	1399	1.2359	560	0.4003	675183 No KEGG functional class	172	1355	jgi|Orpsp1_1|1178370|evm.model.c7180000065017.1	104	1132	Orpinomyces sp.	Orpsp1_1_GeneCatalog_proteins_20140826.aa
Orpsp1_1|1178357	572-804:870.0 798-944:594.0 197-288:291.0 494-572:279.0 436-492:173.0 338-394:170.0 397-439:149.0 115-192:118.0 304-331:78.0 31-76:122.0 812-886:98.0 718-763:69.0 409-433:63.0 278-298:58.0 461-482:52.0 598-632:50.0 895-916:50.0 206-217:44.0 755-799:89.0 347-390:69.0 488-537:69.0 832-854:56.0 398-440:49.0 710-724:46.0 841-861:53.0 355-380:51.0 399-417:50.0 755-771:50.0 1094-1117:50.0 1062-1085:48.…	4099	0	1508	1.6043	753	0.4993	675183 No KEGG functional class	31	1117	jgi|Orpsp1_1|1178357|evm.model.c7180000064990.1	20	933	Orpinomyces sp.	Orpsp1_1_GeneCatalog_proteins_20140826.aa
Orpsp1_1|1176766	948-1342:1157.0 1340-1449:259.0 672-729:109.0 755-793:100.0 831-870:90.0 511-543:85.0 614-659:76.0 870-916:74.0 198-230:66.0 269-352:65.0 798-828:65.0 1440-1484:140.0 773-832:89.0 832-876:76.0 391-431:75.0 1248-1281:60.0 1340-1367:59.0 515-538:54.0 309-330:49.0 462-483:49.0 1197-1242:47.0 812-846:81.0 446-481:64.0 755-774:59.0 1055-1104:56.0 919-963:48.0 1177-1221:46.0 400-434:71.0 337-377:62.0 3…	3383	0	1616	0.9495	615	0.3806	675183 No KEGG functional class	198	1484	jgi|Orpsp1_1|1176766|evm.model.c7180000058915.1	71	1641	Orpinomyces sp.	Orpsp1_1_GeneCatalog_proteins_20140826.aa
Orpsp1_1|1176525	928-1255:890.0 1285-1338:152.0 1342-1379:137.0 755-799:133.0 1394-1447:132.0 1439-1484:124.0 676-744:117.0 840-870:80.0 883-908:62.0 511-540:60.0 400-431:78.0 305-325:67.0 1347-1367:64.0 510-538:63.0 1248-1281:58.0 800-861:101.0 1130-1221:64.0 1058-1094:46.0 413-450:45.0 979-991:45.0	2518	0	1100	0.9121	461	0.4191	675183 No KEGG functional class	305	1484	jgi|Orpsp1_1|1176525|evm.model.c7180000057939.1	5	961	Orpinomyces sp.	Orpsp1_1_GeneCatalog_proteins_20140826.aa
Orpsp1_1|1176404	948-1342:1176.0 1340-1449:253.0 672-729:110.0 755-793:100.0 798-870:93.0 614-659:77.0 870-916:74.0 919-944:48.0 1440-1484:143.0 773-832:89.0 511-543:88.0 832-876:76.0 198-230:60.0 1055-1104:58.0 307-329:56.0 1344-1367:55.0 812-846:75.0 745-777:67.0 303-360:60.0 463-484:56.0 847-872:54.0 1248-1281:52.0 400-434:74.0 343-365:56.0 305-330:51.0 391-431:74.0 798-828:64.0 287-331:55.0 462-484:53.0 1074-…	3398	0	1602	0.6439	619	0.3864	675183 No KEGG functional class	198	1484	jgi|Orpsp1_1|1176404|evm.model.c7180000057469.1	565	2428	Orpinomyces sp.	Orpsp1_1_GeneCatalog_proteins_20140826.aa
Orpsp1_1|1175928	952-1344:1169.0 1343-1452:240.0 892-936:133.0 812-870:117.0 755-788:108.0 594-657:100.0 672-714:72.0 1440-1488:123.0 773-812:75.0 456-483:73.0 304-325:69.0 1098-1136:69.0 348-369:57.0 171-215:55.0 510-529:54.0 1320-1341:54.0 748-799:74.0 832-854:69.0 459-483:64.0 324-372:61.0 1205-1236:54.0 384-417:52.0 1349-1371:52.0 894-940:71.0 806-845:68.0 480-524:56.0 197-212:55.0 466-483:53.0 523-540:49.0 1…	3395	0	1485	0.6828	613	0.4128	675183 No KEGG functional class	171	1488	jgi|Orpsp1_1|1175928|evm.model.c7180000055762.1	179	1335	Orpinomyces sp.	Orpsp1_1_GeneCatalog_proteins_20140826.aa
NeoWI3_1|801097	157-336:795.0 1-94:237.0 146-160:44.0 80-150:222.0	1298	3.24e-128	360	1.0557	244	0.6778	675292 No KEGG functional class	1	336	jgi|NeoWI3_1|801097|estExt_fgenesh1_pg.C_5_t20061	1	341	Neocallimastix sp. WI3-B v1.0	NeoWI3_1_GeneCatalog_proteins_20201119.aa
NeoWI3_1|542462	144-336:886.0 1-70:290.0 74-142:229.0	1405	6.35e-175	332	1.0061	266	0.8012	675292 No KEGG functional class	1	336	jgi|NeoWI3_1|542462|estExt_Genewise1.C_30_t10181	1	330	Neocallimastix sp. WI3-B v1.0	NeoWI3_1_GeneCatalog_proteins_20201119.aa
Neosp1|675292	1-336:1757.0	1757	0	336	1	336	1	675292 No KEGG functional class	1	336	jgi|Neosp1|675292|estExt_fgenesh1_pg.C_2250017	1	336	Neocallimastix californiae G1 v1.0	Neosp1_GeneCatalog_proteins_20170918.aa
Neosp1|670851	160-336:800.0 18-168:475.0	1275	2.56e-162	328	0.948	235	0.7165	675292 No KEGG functional class	18	336	jgi|Neosp1|670851|estExt_fgenesh1_pg.C_990046	25	346	Neocallimastix californiae G1 v1.0	Neosp1_GeneCatalog_proteins_20170918.aa
Neolan1|1723199	160-336:800.0 18-168:475.0	1275	3.46e-162	328	0.948	235	0.7165	675292 No KEGG functional class	18	336	jgi|Neolan1|1723199|fgenesh2_kg.113___349___TRINITY_DN354_c4_g1_i2	25	346	Neocallimastix lanati v1.0	Neolan1_GeneCatalog_proteins_20200610.aa
Neolan1|995608	1-336:1757.0	1757	0	336	1	336	1	675292 No KEGG functional class	1	336	jgi|Neolan1|995608|estExt_Genewise1.C_520182	1	336	Neocallimastix lanati v1.0	Neolan1_GeneCatalog_proteins_20200610.aa
NeoGfMa1|532341	144-336:886.0 1-70:290.0 74-142:229.0	1405	6.42e-175	332	1.0061	266	0.8012	675292 No KEGG functional class	1	336	jgi|NeoGfMa1|532341|gm4.31334_g	1	330	Neocallimastix sp. Gf-Ma3-1 v1.0	NeoGfMa1_GeneCatalog_proteins_20201119.aa
NeoGfMa1|366633	157-336:795.0 1-94:237.0 146-160:44.0 80-150:222.0	1298	3.27e-128	360	1.0557	244	0.6778	675292 No KEGG functional class	1	336	jgi|NeoGfMa1|366633|estExt_Genewise1.C_22_t10300	1	341	Neocallimastix sp. Gf-Ma3-1 v1.0	NeoGfMa1_GeneCatalog_proteins_20201119.aa
Caecom1|530356	160-336:690.0 28-140:297.0 4-25:51.0	1038	8.72e-125	312	0.9313	188	0.6026	675292 No KEGG functional class	4	336	jgi|Caecom1|530356|estExt_fgenesh1_pg.C_3670016	7	335	Caecomyces churrovis A v1.0	Caecom1_GeneCatalog_proteins_20171213.aa
Caecom1|528975	160-336:634.0 4-141:300.0	934	1.82e-115	315	0.9347	170	0.5397	675292 No KEGG functional class	4	336	jgi|Caecom1|528975|estExt_fgenesh1_pg.C_2520005	7	337	Caecomyces churrovis A v1.0	Caecom1_GeneCatalog_proteins_20171213.aa
NeoWI3_1|769171	1-40:142.0 113-126:59.0 149-156:46.0	247	3.13e-17	62	0.3949	49	0.7903	675409 No KEGG functional class	1	156	jgi|NeoWI3_1|769171|estExt_Genemark4.C_1130018	1	157	Neocallimastix sp. WI3-B v1.0	NeoWI3_1_GeneCatalog_proteins_20201119.aa
Neosp1|675409	1-60:152.0 113-126:73.0 149-156:46.0	271	1.34e-20	82	0.5256	57	0.6951	675409 No KEGG functional class	1	156	jgi|Neosp1|675409|estExt_fgenesh1_pg.C_2290042	1	156	Neocallimastix californiae G1 v1.0	Neosp1_GeneCatalog_proteins_20170918.aa
Neolan1|1655788	1-60:152.0 113-126:73.0 149-156:46.0	271	1.74e-20	82	0.5256	57	0.6951	675409 No KEGG functional class	1	156	jgi|Neolan1|1655788|fgenesh2_kg.24___1147___TRINITY_DN476_c1_g1_i1	1	156	Neocallimastix lanati v1.0	Neolan1_GeneCatalog_proteins_20200610.aa
NeoGfMa1|605382	1-40:142.0 113-126:59.0 149-156:46.0	247	3.16e-17	62	0.3949	49	0.7903	675409 No KEGG functional class	1	156	jgi|NeoGfMa1|605382|estExt_fgenesh1_pm.C_870041	1	157	Neocallimastix sp. Gf-Ma3-1 v1.0	NeoGfMa1_GeneCatalog_proteins_20201119.aa
Piromy_p0_1|537325	23-381:1775.0 389-420:122.0 434-462:119.0	2016	0	420	0.7554	351	0.8357	675650 No KEGG functional class	23	462	jgi|Piromy_p0_1|537325|fgenesh2_kg.chromosome_7___1372___TRINITY_DN8748_c8_g1_i1	55	503	Piromyces sp. UH3-1 v2.0	Piromy_p0_1_GeneCatalog_proteins_20200513.aa
Piromy_p0_1|441110	23-389:1828.0 392-462:290.0 483-490:44.0 439-462:92.0 1-23:54.0	2308	0	493	0.8095	402	0.8154	675650 No KEGG functional class	1	490	jgi|Piromy_p0_1|441110|estExt_fgenesh1_pg.C_chromosome_4_t20475	1	597	Piromyces sp. UH3-1 v2.0	Piromy_p0_1_GeneCatalog_proteins_20200513.aa
Pirfi3|582138	23-389:1900.0 384-462:248.0 483-490:44.0 431-462:90.0 1-23:59.0	2341	0	509	0.8469	412	0.8094	675650 No KEGG functional class	1	490	jgi|Pirfi3|582138|fgenesh2_kg.13_#_9_#_Locus140v1rpkm864.77	1	589	Piromyces finnis v3.0	Pirfi3_GeneCatalog_proteins_20160330.aa
PirE2_1|21620	23-382:1886.0 382-427:186.0 425-462:147.0 1-19:50.0 483-491:48.0	2317	0	472	0.8582	407	0.8623	675650 No KEGG functional class	1	491	jgi|PirE2_1|21620|estExt_Genemark1.C_12590001	1	529	Piromyces sp. E2 v1.0	PirE2_1_GeneCatalog_proteins_20110421.aa
Pecora1|12899	23-389:1832.0 393-427:125.0 439-462:74.0 413-462:142.0	2173	0	476	0.7907	380	0.7983	675650 No KEGG functional class	23	462	jgi|Pecora1|12899|allA13370	107	590	Pecoramyces sp. F1	Pecora1_ExternalModels_proteins_2021-11-19.fasta
NeoWI3_1|722509	23-428:2120.0 430-462:153.0 1-23:112.0 483-491:49.0	2434	0	471	0.7889	428	0.9087	675650 No KEGG functional class	1	491	jgi|NeoWI3_1|722509|gm4.16186_g	1	575	Neocallimastix sp. WI3-B v1.0	NeoWI3_1_GeneCatalog_proteins_20201119.aa
Neosp1|675650	1-462:2565.0 483-519:194.0	2759	0	499	0.9615	499	1	675650 No KEGG functional class	1	519	jgi|Neosp1|675650|estExt_fgenesh1_pg.C_2390030	1	519	Neocallimastix californiae G1 v1.0	Neosp1_GeneCatalog_proteins_20170918.aa
Neolan1|1051950	1-462:2565.0 483-519:194.0	2759	0	499	0.9615	499	1	675650 No KEGG functional class	1	519	jgi|Neolan1|1051950|estExt_Genewise1Plus.C_880201	1	519	Neocallimastix lanati v1.0	Neolan1_GeneCatalog_proteins_20200610.aa
NeoGfMa1|512868	23-428:2120.0 430-462:153.0 1-23:112.0 483-491:49.0	2434	0	471	0.7889	428	0.9087	675650 No KEGG functional class	1	491	jgi|NeoGfMa1|512868|gm4.11861_g	1	575	Neocallimastix sp. Gf-Ma3-1 v1.0	NeoGfMa1_GeneCatalog_proteins_20201119.aa
Caecom1|495240	23-391:1807.0 396-427:113.0 425-462:113.0	2033	0	439	0.7209	354	0.8064	675650 No KEGG functional class	23	462	jgi|Caecom1|495240|fgenesh1_pg.230_#_15	135	586	Caecomyces churrovis A v1.0	Caecom1_GeneCatalog_proteins_20171213.aa
Piromy_p0_1|488935	512-641:460.0 50-180:382.0 397-513:370.0 796-898:275.0 332-395:154.0 905-963:153.0 23-47:93.0 672-797:453.0 550-656:223.0 227-321:193.0 490-553:127.0 167-200:95.0 655-673:87.0 199-232:76.0 710-799:203.0 540-634:187.0 813-866:171.0 906-963:163.0 288-324:134.0 644-703:130.0 866-905:74.0 495-513:72.0 512-545:63.0 355-462:250.0 540-638:215.0 234-326:206.0 173-240:138.0 334-355:87.0 512-545:73.0 495-5…	8711	0	3369	3.1934	1606	0.4767	676011 No KEGG functional class	23	963	jgi|Piromy_p0_1|488935|estExt_Genemark4.C_chromosome_10_t20333	184	1053	Piromyces sp. UH3-1 v2.0	Piromy_p0_1_GeneCatalog_proteins_20200513.aa
PirE2_1|5432	512-645:431.0 672-800:401.0 189-333:363.0 355-462:267.0 903-960:168.0 809-859:158.0 865-910:90.0 646-673:88.0 489-513:70.0 178-187:49.0 672-804:416.0 512-645:403.0 180-278:250.0 370-452:201.0 807-866:176.0 902-960:132.0 646-673:84.0 866-905:68.0 338-355:66.0 485-502:66.0 355-365:52.0 512-645:427.0 199-331:388.0 355-462:279.0 672-738:187.0 742-799:158.0 491-513:80.0 647-673:80.0 336-355:65.0 172-1…	13640	0	5041	3.1724	2420	0.4801	676011 No KEGG functional class	160	963	jgi|PirE2_1|5432|gm1.4378_g	464	1588	Piromyces sp. E2 v1.0	PirE2_1_GeneCatalog_proteins_20110421.aa
PirE2_1|5429	512-645:427.0 672-800:402.0 215-329:293.0 355-456:266.0 903-960:174.0 808-859:163.0 178-200:84.0 646-673:82.0 865-910:82.0 489-513:72.0 334-355:68.0 199-216:64.0 512-644:419.0 199-327:396.0 355-462:276.0 742-799:179.0 672-738:171.0 489-513:79.0 178-200:77.0 646-673:68.0 334-355:61.0 672-798:400.0 503-645:364.0 180-278:236.0 370-456:195.0 808-866:193.0 902-960:131.0 866-905:70.0 338-355:68.0 655-6…	13930	0	5269	3.3972	2464	0.4676	676011 No KEGG functional class	165	963	jgi|PirE2_1|5429|gm1.4375_g	380	1550	Piromyces sp. E2 v1.0	PirE2_1_GeneCatalog_proteins_20110421.aa
PirE2_1|1479	672-799:495.0 85-171:305.0 808-897:287.0 384-466:281.0 907-959:140.0 178-215:123.0 483-513:117.0 36-47:60.0 51-83:60.0 512-659:493.0 693-799:222.0 228-308:206.0 334-355:78.0 199-326:469.0 534-639:215.0 354-386:85.0 178-200:77.0 701-781:190.0 813-866:143.0 906-960:139.0 655-688:105.0 866-905:64.0 541-656:200.0 489-528:122.0 672-703:90.0 652-673:78.0 221-326:223.0 199-228:113.0 173-200:81.0 355-464…	6395	0	2422	3.8752	1172	0.4839	676011 No KEGG functional class	36	960	jgi|PirE2_1|1479|gm1.425_g	1	624	Piromyces sp. E2 v1.0	PirE2_1_GeneCatalog_proteins_20110421.aa
Pecora1|5554	512-673:616.0 199-326:554.0 672-806:547.0 50-186:459.0 804-905:364.0 1-55:120.0 332-355:85.0 178-200:77.0 512-673:643.0 672-806:526.0 334-464:515.0 804-866:176.0 906-960:155.0 483-513:112.0 866-905:80.0 512-673:627.0 173-326:412.0 693-800:318.0 355-457:267.0 330-355:83.0 491-513:77.0 672-806:549.0 490-656:396.0 806-866:183.0 896-960:165.0 199-331:543.0 534-640:315.0 355-457:251.0 332-355:86.0 173…	12950	0	4015	4.1137	2316	0.5768	676011 No KEGG functional class	1	963	jgi|Pecora1|5554|allA08755	1	975	Pecoramyces sp. F1	Pecora1_ExternalModels_proteins_2021-11-19.fasta
Neosp1|705501	36-331:1253.0 496-646:650.0 655-798:576.0 338-458:340.0 483-492:45.0 496-800:1365.0 336-458:331.0 906-963:135.0 835-866:79.0 866-904:68.0 483-492:45.0 493-809:1369.0 896-960:151.0 835-866:106.0 866-904:85.0 806-835:79.0 173-331:724.0 495-638:577.0 339-457:328.0 173-331:676.0 338-456:293.0 646-809:659.0 906-963:152.0 835-866:92.0 866-904:90.0 806-842:81.0 182-327:553.0 906-963:145.0 835-866:95.0 8…	11296	0	3112	4.0786	2037	0.6546	676011 No KEGG functional class	36	963	jgi|Neosp1|705501|fgenesh2_kg.177_#_2_#_Locus12272v1rpkm1.88	1	763	Neocallimastix californiae G1 v1.0	Neosp1_GeneCatalog_proteins_20170918.aa
Neosp1|676011	1-963:5014.0 652-809:754.0 491-656:377.0 334-458:360.0 906-963:151.0 866-904:84.0 806-835:77.0 835-866:69.0 492-649:754.0 178-320:365.0 334-456:358.0 743-800:151.0 701-739:84.0 644-673:77.0 672-703:69.0 483-492:42.0 491-644:701.0 652-793:354.0 906-963:139.0 866-904:93.0 835-866:78.0 813-835:61.0 178-331:701.0 335-456:352.0 583-640:139.0 541-579:93.0 512-543:78.0 491-513:61.0 646-805:698.0 904-956…	14561	0	3922	4.0727	2595	0.6617	676011 No KEGG functional class	1	963	jgi|Neosp1|676011|estExt_fgenesh1_pg.C_2530021	1	963	Neocallimastix californiae G1 v1.0	Neosp1_GeneCatalog_proteins_20170918.aa
Neosp1|83085	1-649:2878.0 693-739:96.0 644-673:82.0 652-912:1203.0 491-656:364.0 334-458:359.0 494-644:679.0 652-793:346.0 906-963:154.0 835-866:81.0 866-904:71.0 813-835:64.0 646-805:690.0 904-956:122.0 834-860:77.0 877-901:65.0 813-834:59.0 178-320:353.0 334-458:345.0 534-579:104.0 491-513:63.0 178-325:624.0 354-386:92.0 334-355:67.0 906-960:151.0 835-866:96.0 808-835:84.0 866-904:77.0 199-228:112.0 221-266…	9932	0	2901	3.8322	1760	0.6067	676011 No KEGG functional class	1	963	jgi|Neosp1|83085|CE83084_5804	1	752	Neocallimastix californiae G1 v1.0	Neosp1_GeneCatalog_proteins_20170918.aa
Neolan1|1429187	23-331:1314.0 496-646:650.0 655-794:557.0 338-458:327.0 483-492:45.0 496-800:1353.0 336-458:329.0 906-957:124.0 835-866:79.0 866-904:68.0 483-492:45.0 493-809:1359.0 896-960:151.0 835-866:106.0 866-904:85.0 806-835:79.0 173-331:708.0 495-634:558.0 339-457:328.0 173-331:676.0 338-456:293.0 646-809:659.0 906-963:153.0 835-866:92.0 806-842:81.0 866-904:77.0 182-342:544.0 906-963:145.0 835-866:95.0 8…	11234	0	3126	3.6604	2028	0.6488	676011 No KEGG functional class	23	963	jgi|Neolan1|1429187|estExt_Genemark4.C_750054	24	814	Neocallimastix lanati v1.0	Neolan1_GeneCatalog_proteins_20200610.aa
Neolan1|1342615	160-455:1594.0 483-649:824.0 1-150:678.0 743-796:147.0 701-739:84.0 644-673:78.0 672-703:69.0 652-959:1613.0 334-458:360.0 491-612:346.0 624-644:55.0 491-644:696.0 652-772:340.0 906-963:150.0 866-904:95.0 835-866:81.0 813-835:61.0 334-456:360.0 178-299:347.0 583-644:137.0 541-579:93.0 512-543:78.0 491-513:60.0 178-332:697.0 424-464:110.0 354-384:83.0 395-419:68.0 332-355:66.0 646-805:693.0 904-94…	11208	0	3043	3.2862	1989	0.6536	676011 No KEGG functional class	1	963	jgi|Neolan1|1342615|gm4.22225_g	1	784	Neocallimastix lanati v1.0	Neolan1_GeneCatalog_proteins_20200610.aa
Pirfi3|333118	361-462:406.0 273-340:248.0 62-113:159.0 114-178:145.0 26-58:79.0 337-347:52.0	1089	2.81e-111	331	0.7058	197	0.5952	676197 No KEGG functional class	26	462	jgi|Pirfi3|333118|estExt_Genewise1.C_400048	25	467	Piromyces finnis v3.0	Pirfi3_GeneCatalog_proteins_20160330.aa
Pecora1|6241	62-181:399.0 273-380:392.0 378-463:321.0 19-64:138.0	1250	1.36e-142	360	0.766	230	0.6389	676197 No KEGG functional class	19	463	jgi|Pecora1|6241|allA06264	21	468	Pecoramyces sp. F1	Pecora1_ExternalModels_proteins_2021-11-19.fasta
NeoWI3_1|580578	22-183:513.0 365-429:242.0 289-367:216.0 422-446:86.0 273-294:85.0 444-462:46.0	1188	6.02e-124	372	0.7546	213	0.5726	676197 No KEGG functional class	22	462	jgi|NeoWI3_1|580578|estExt_Genewise1Plus.C_20_t10105	19	492	Neocallimastix sp. WI3-B v1.0	NeoWI3_1_GeneCatalog_proteins_20201119.aa
NeoWI3_1|573191	273-463:880.0 1-184:797.0 222-236:64.0	1741	0	390	0.8423	332	0.8513	676197 No KEGG functional class	1	463	jgi|NeoWI3_1|573191|estExt_Genewise1Plus.C_11_t20365	1	463	Neocallimastix sp. WI3-B v1.0	NeoWI3_1_GeneCatalog_proteins_20201119.aa
Neosp1|697041	55-181:404.0 365-429:257.0 316-367:152.0 422-462:128.0 297-320:89.0 273-293:67.0	1097	4.01e-112	330	0.7036	194	0.5879	676197 No KEGG functional class	55	462	jgi|Neosp1|697041|fgenesh2_kg.4_#_28_#_Locus6199v1rpkm7.71	29	468	Neocallimastix californiae G1 v1.0	Neosp1_GeneCatalog_proteins_20170918.aa
Neosp1|676197	273-463:931.0 1-184:876.0 222-236:76.0	1883	0	390	0.8423	366	0.9385	676197 No KEGG functional class	1	463	jgi|Neosp1|676197|estExt_fgenesh1_pg.C_2620024	1	463	Neocallimastix californiae G1 v1.0	Neosp1_GeneCatalog_proteins_20170918.aa
Neolan1|1748020	22-181:484.0 365-429:256.0 316-367:152.0 422-462:125.0 297-320:89.0 273-293:67.0	1173	5.29e-122	363	0.7408	209	0.5758	676197 No KEGG functional class	22	462	jgi|Neolan1|1748020|fgenesh2_kg.199___16___TRINITY_DN1358_c4_g1_i1	19	489	Neocallimastix lanati v1.0	Neolan1_GeneCatalog_proteins_20200610.aa
Neolan1|1647485	273-463:931.0 1-184:876.0 222-236:71.0	1878	0	390	0.8423	365	0.9359	676197 No KEGG functional class	1	463	jgi|Neolan1|1647485|fgenesh2_kg.17___1855___TRINITY_DN15262_c0_g1_i2	1	463	Neocallimastix lanati v1.0	Neolan1_GeneCatalog_proteins_20200610.aa
NeoGfMa1|596017	273-463:880.0 1-184:797.0 222-236:64.0	1741	0	390	0.8423	332	0.8513	676197 No KEGG functional class	1	463	jgi|NeoGfMa1|596017|estExt_fgenesh1_pm.C_4_t10093	1	463	Neocallimastix sp. Gf-Ma3-1 v1.0	NeoGfMa1_GeneCatalog_proteins_20201119.aa
NeoGfMa1|585000	22-183:513.0 365-429:242.0 289-367:216.0 422-446:86.0 273-294:85.0 444-462:46.0	1188	6.09e-124	372	0.7546	213	0.5726	676197 No KEGG functional class	22	462	jgi|NeoGfMa1|585000|estExt_fgenesh1_pg.C_160044	19	492	Neocallimastix sp. Gf-Ma3-1 v1.0	NeoGfMa1_GeneCatalog_proteins_20201119.aa
Pirfi3|587595	14-218:810.0 1-21:49.0	859	1.59e-103	226	1.0135	154	0.6814	676442 No KEGG functional class	1	218	jgi|Pirfi3|587595|fgenesh2_kg.74_#_6_#_Locus681v1rpkm65.89	1	222	Piromyces finnis v3.0	Pirfi3_GeneCatalog_proteins_20160330.aa
Pecora1|4914	1-177:662.0 174-218:218.0	880	3.31e-106	222	1.0183	158	0.7117	676442 No KEGG functional class	1	218	jgi|Pecora1|4914|allA04972	1	217	Pecoramyces sp. F1	Pecora1_ExternalModels_proteins_2021-11-19.fasta
NeoWI3_1|760633	1-217:1108.0	1108	1.73e-142	217	0.7457	201	0.9263	676442 No KEGG functional class	1	217	jgi|NeoWI3_1|760633|estExt_Genemark4.C_27_t10133	1	217	Neocallimastix sp. WI3-B v1.0	NeoWI3_1_GeneCatalog_proteins_20201119.aa
NeoWI3_1|106988	50-218:669.0 1-52:200.0	869	1.73e-104	221	1.0231	155	0.7014	676442 No KEGG functional class	1	218	jgi|NeoWI3_1|106988|CE106987_14395	1	215	Neocallimastix sp. WI3-B v1.0	NeoWI3_1_GeneCatalog_proteins_20201119.aa
Neosp1|699671	47-218:689.0 1-52:196.0	885	8.03e-107	224	1.037	157	0.7009	676442 No KEGG functional class	1	218	jgi|Neosp1|699671|fgenesh2_kg.34_#_40_#_Locus1323v1rpkm82.56	1	215	Neocallimastix californiae G1 v1.0	Neosp1_GeneCatalog_proteins_20170918.aa
Neosp1|676442	1-218:1187.0	1187	2.17e-153	218	1	218	1	676442 No KEGG functional class	1	218	jgi|Neosp1|676442|estExt_fgenesh1_pg.C_2730028	1	218	Neocallimastix californiae G1 v1.0	Neosp1_GeneCatalog_proteins_20170918.aa
Neolan1|1732030	1-218:1187.0	1187	2.96e-153	218	1	218	1	676442 No KEGG functional class	1	218	jgi|Neolan1|1732030|fgenesh2_kg.133___555___TRINITY_DN1621_c9_g2_i1	1	218	Neocallimastix lanati v1.0	Neolan1_GeneCatalog_proteins_20200610.aa
Neolan1|1698506	47-218:689.0 1-52:196.0	885	1.09e-106	224	1.037	157	0.7009	676442 No KEGG functional class	1	218	jgi|Neolan1|1698506|fgenesh2_kg.70___736___TRINITY_DN2922_c2_g1_i1	1	215	Neocallimastix lanati v1.0	Neolan1_GeneCatalog_proteins_20200610.aa
NeoGfMa1|604053	50-218:669.0 1-52:200.0	869	1.75e-104	221	1.0231	155	0.7014	676442 No KEGG functional class	1	218	jgi|NeoGfMa1|604053|estExt_fgenesh1_pm.C_580033	1	215	Neocallimastix sp. Gf-Ma3-1 v1.0	NeoGfMa1_GeneCatalog_proteins_20201119.aa
NeoGfMa1|573420	1-218:1117.0	1117	1.05e-143	218	0.7124	202	0.9266	676442 No KEGG functional class	1	218	jgi|NeoGfMa1|573420|estExt_Genemark4.C_440148	1	218	Neocallimastix sp. Gf-Ma3-1 v1.0	NeoGfMa1_GeneCatalog_proteins_20201119.aa
NeoWI3_1|792473	34-245:1107.0 1-15:66.0	1173	1.4e-147	227	0.8566	223	0.9824	676501 No KEGG functional class	1	245	jgi|NeoWI3_1|792473|estExt_fgenesh1_pm.C_240133	1	265	Neocallimastix sp. WI3-B v1.0	NeoWI3_1_GeneCatalog_proteins_20201119.aa
NeoWI3_1|583226	34-245:1093.0 1-15:68.0	1161	6.21e-146	227	0.938	221	0.9736	676501 No KEGG functional class	1	245	jgi|NeoWI3_1|583226|estExt_Genewise1Plus.C_24_t10464	1	242	Neocallimastix sp. WI3-B v1.0	NeoWI3_1_GeneCatalog_proteins_20201119.aa
NeoWI3_1|583217	34-245:1103.0 1-15:68.0	1171	2.64e-147	227	0.938	223	0.9824	676501 No KEGG functional class	1	245	jgi|NeoWI3_1|583217|estExt_Genewise1Plus.C_24_t10455	1	242	Neocallimastix sp. WI3-B v1.0	NeoWI3_1_GeneCatalog_proteins_20201119.aa
Neosp1|676501	34-245:1118.0 1-16:72.0	1190	4.44e-150	228	0.9306	228	1	676501 No KEGG functional class	1	245	jgi|Neosp1|676501|estExt_fgenesh1_pg.C_2760016	1	245	Neocallimastix californiae G1 v1.0	Neosp1_GeneCatalog_proteins_20170918.aa
Neolan1|1433065	34-244:1108.0 1-15:68.0	1176	3.09e-147	226	0.6331	224	0.9912	676501 No KEGG functional class	1	244	jgi|Neolan1|1433065|estExt_Genemark4.C_1190029	1	322	Neocallimastix lanati v1.0	Neolan1_GeneCatalog_proteins_20200610.aa
Neolan1|1433063	34-244:1108.0 1-15:68.0	1176	3.1e-147	226	0.6313	224	0.9912	676501 No KEGG functional class	1	244	jgi|Neolan1|1433063|estExt_Genemark4.C_1190027	1	329	Neocallimastix lanati v1.0	Neolan1_GeneCatalog_proteins_20200610.aa
Neolan1|1433061	34-245:1108.0 1-15:68.0	1176	2.7e-147	227	0.7161	225	0.9912	676501 No KEGG functional class	1	245	jgi|Neolan1|1433061|estExt_Genemark4.C_1190025	1	317	Neocallimastix lanati v1.0	Neolan1_GeneCatalog_proteins_20200610.aa
Neolan1|1315540	34-245:1118.0 1-15:68.0	1186	2.12e-149	227	0.8833	227	1	676501 No KEGG functional class	1	245	jgi|Neolan1|1315540|estExt_fgenesh1_pg.C_1190012	1	257	Neocallimastix lanati v1.0	Neolan1_GeneCatalog_proteins_20200610.aa
NeoGfMa1|572122	34-245:1103.0 1-15:66.0	1169	2.64e-146	227	0.7323	222	0.978	676501 No KEGG functional class	1	245	jgi|NeoGfMa1|572122|estExt_Genemark4.C_350106	1	310	Neocallimastix sp. Gf-Ma3-1 v1.0	NeoGfMa1_GeneCatalog_proteins_20201119.aa
NeoGfMa1|372143	34-245:1103.0 1-15:68.0	1171	2.67e-147	227	0.938	223	0.9824	676501 No KEGG functional class	1	245	jgi|NeoGfMa1|372143|estExt_Genewise1.C_350111	1	242	Neocallimastix sp. Gf-Ma3-1 v1.0	NeoGfMa1_GeneCatalog_proteins_20201119.aa
[truncated: 110 more rows]
